# Supplementary material for: Analysis of single-nucleotide polymorphisms in genes associated with triple-negative breast cancer
Source: Front Genet. 2022 Dec 6;13:1071352. doi: 10.3389/fgene.2022.1071352 (PMC9763624; doi:10.3389/fgene.2022.1071352)
Supplement: Supplementary file 1 [file Table2.xlsx]

## Sheet: Scores
Supplementary table 2A. Number and percentage of SNPs predicted pathogenic by respective predictors for each gene
Genes	AA alt	SIFT		Polyphen		SNAP2		I-Mutant 2.0		PhD SNP		Consurf		CGI
		#	%	#	%	#	%	#	%	#	%	#	%	#	%
BRCA1	2121	1080	50.9194	752	35.455	1130	53.2768	1754	82.6968	538	25.3654	1025	48.3263	208	9.80669
BRCA2	3710	1631	43.9623	1853	49.9461	1156	31.159	3094	83.3962	968	26.0916	1706	45.9838	735	19.8113
EGFR	741	416	56.1404	412	55.6005	374	50.4723	668	90.1484	301	40.6208	442	59.6491	414	55.8704
PIK3CA	342	129	37.7193	162	47.3684	121	35.3801	294	85.9649	128	37.4269	178	52.0468	210	61.4035
PTEN	314	186	59.2357	199	63.3758	186	59.2357	281	89.4904	165	52.5478	196	62.4204	176	56.051
TP53	609	402	66.0099	418	68.6371	417	68.4729	523	85.8785	301	49.4253	421	69.1297	401	65.8456
Supplementary table 2B. Number of SNPs for each gene that were scored and filtered based on our framework
Score Genes	0		1		2		3		4		5		6		7
	#	%	#	%	#	%	#	%	#	%	#	%	#	%	#	%
BRCA1	58	2.73456	426	20.0849	411	19.3777	393	18.529	334	15.7473	311	14.6629	147	6.93069	41	1.93305
BRCA2	88	2.37197	846	22.8032	773	20.8356	626	16.8733	561	15.1213	417	11.2399	249	6.71159	150	4.04313
EGFR	14	1.88934	94	12.6856	110	14.8448	92	12.4157	74	9.9865	102	13.7652	154	20.7827	101	13.6302
PIK3CA	6	1.75439	56	16.3743	63	18.4211	48	14.0351	46	13.4503	56	16.3743	37	10.8187	30	8.77193
PTEN	1	0.318471	49	15.6051	45	14.3312	17	5.41401	29	9.23567	31	9.87261	66	21.0191	76	24.2038
TP53	30	4.92611	68	11.1658	46	7.55337	35	5.74713	40	6.56814	59	9.68801	154	25.2874	177	29.064
Supplementary table 2C. Number of SNPs that were scored in the prediction framework and matched with SNPs reported from breast cancer patients in in the cBioPortal
Genes	# AA alt		0		1		2		3		4		5		6		7
	PD	OL	#	%	#	%	#	%	#	%	#	%	#	%	#	%	#	%
BRCA1	89	25	0	0	0	0	8	32	5	20	2	8	2	8	6	24	2	8
BRCA2	151	63	3	4.76	8	12.7	14	22.22	6	9.52	11	17.46	9	14.29	6	9.52	6	9.52
EGFR	102	48	0	0	6	12.5	3	6.25	8	16.67	6	12.5	7	14.58	11	22.92	7	14.58
PIK3CA	167	62	0	0	0	0	7	11.29	7	11.29	15	24.19	14	22.58	15	24.19	4	6.45
PTEN	105	37	0	0	1	2.7	1	2.7	1	2.7	1	2.7	7	18.92	8	21.62	18	48.65
TP53	341	254	0	0	4	1.57	3	1.18	2	0.79	9	3.54	32	12.6	84	33.07	120	47.24
Supplementary table 2D. Number of samples mutated per gene and their 90th percentile values
					Total number of samples, N = 11632
					Genes		Number of samples mutated (%)			90th Percentile
					BRCA1		413 (4)			2
					BRCA2		552 (5)			2
					EGFR		396 (3)			2
					PIK3CA		4197 (36)			22
					PTEN		942 (8)			4
					TP53		3894 (33)			14
Legends: AA-Amino acid; alt-alteration; PD-Patient derived; OL-Overlapping; #-Number; %-Percentage
Individual score break up for each gene and their respective tools are present in the sheets named after each gene

## Sheet: BRCA1
id	chrom	position	ref	alt	Mutation	SIFT	PolyPhen	SNAP2	I_MUT	PHD_SNP	Consurf	CGI	Score	cBio	Count
rs781260818	17	43082446	G	A	L1439F	1	0	0	1	0	0	0	2	TCGA-B	1
rs878854932	17	43094176	A	G	V452A	0	0	1	1	0	0	0	2	TCGA-B	1
rs80357160	17	43091734	C	G	S1266T	0	0	1	1	0	0	0	2	TCGA-B	1
rs28897681	17	43093448	C	T	D695N	0	0	1	1	0	0	0	2	TCGA-B	1
rs730881442	17	43094272	T	C	D420G	0	0	1	1	0	0	0	2	TCGA-B	1
rs879255288	17	43094789	T	C	T248A	0	0	1	1	0	0	0	2	TCGA-B	1
rs28897676	17	43094045	G	A	R496C	0	0	0	1	1	0	0	2	TCGA-B	2
rs1289961661	17	43094435	C	T	D366N	0	0	1	1	0	0	0	2	TCGA-B	3
rs28897674	17	43099865	T	G	S153R	1	1	1	0	0	0	0	3	TCGA-B	1
rs80356991	17	43104136	C	T	E143K	0	0	1	1	0	1	0	3	TCGA-B	1
rs786203937	17	43093693	C	T	R613K	0	0	1	1	0	1	0	3	TCGA-B	1
rs397507198	17	43093250	C	T	E761K	1	0	1	1	0	0	0	3	TCGA-B	2
rs1222778457	17	43092787	G	C	S915C	1	0	0	1	0	1	0	3	TCGA-B	2
rs1451089848	17	43092152	A	G	Y1127H	1	0	1	1	1	0	0	4	TCGA-B	2
rs80356970	17	43092596	G	A	R979C	0	1	1	1	1	0	0	4	TCGA-B	2
rs80356906	17	43074337	C	G	D1578H	1	1	1	1	0	1	0	5	TCGA-B	1
rs80357360	17	43094164	A	G	I456T	1	1	1	1	0	1	0	5	TCGA-B	1
rs1064794100	17	43094096	C	T	E479K	1	0	1	1	1	1	1	6	TCGA-B	1
rs1306111238	17	43094417	A	G	W372R	1	1	1	1	1	1	0	6	TCGA-B	1
rs786202155	17	43092310	C	G	R1074T	1	1	1	1	1	1	0	6	TCGA-B	1
rs80357003	17	43092940	G	A	S864L	1	1	1	0	1	1	1	6	TCGA-B	1
rs28897672	17	43106487	A	C	C61G	1	1	1	1	1	1	0	6	TCGA-B	3
rs1060502343	17	43104922	C	A	V83F	1	1	1	1	1	1	1	7	TCGA-B	1
rs80356911	17	43092934	C	T	R866H	1	1	1	1	1	1	1	7	TCGA-B	1
rs80357024	17	43094298	A	C	D411E	0	0	0	0	0	0	0	0
rs730881485	17	43092723	A	C	D936E	0	0	0	0	0	0	0	0
rs730881448	17	43104143	A	C	S140R	0	0	0	0	0	0	0	0
rs143920945	17	43093488	A	C	S681R	0	0	0	0	0	0	0	0
rs80356946	17	43094450	A	G	S361P	0	0	0	0	0	0	0	0
rs1164807386	17	43094496	A	T	D345E	0	0	0	0	0	0	0	0
rs1064794375	17	43094799	AT	G	N244T	0	0	0	0	0	0	0	0
rs770193975	17	43071020	C	A	V1653L	0	0	0	0	0	0	0	0
rs397507223	17	43091654	C	G	A1293P	0	0	0	0	0	0	0	0
rs55909400	17	43092185	C	G	V1116L	0	0	0	0	0	0	0	0
rs28897691	17	43074370	C	T	D1567N	0	0	0	0	0	0	0	0
rs1064793057	17	43091992	C	T	S1180N	0	0	0	0	0	0	0	0
rs773709174	17	43091542	C	T	S1330N	0	0	0	0	0	0	0	0
rs1064793055	17	43104144	C	T	S140N	0	0	0	0	0	0	0	0
rs1452826319	17	43093489	C	T	S681N	0	0	0	0	0	0	0	0
rs878854939	17	43093273	C	T	S753N	0	0	0	0	0	0	0	0
rs56051266	17	43093000	C	T	S844N	0	0	0	0	0	0	0	0
rs183331660	17	43079334	C	T	V1475I	0	0	0	0	0	0	0	0
rs587782458	17	43091935	G	A	A1199V	0	0	0	0	0	0	0	0
rs431825391	17	43092883	G	A	A883V	0	0	0	0	0	0	0	0
rs759878392	17	43094222	G	A	H437Y	0	0	0	0	0	0	0	0
rs786203578	17	43094189	G	A	H448Y	0	0	0	0	0	0	0	0
rs545736576	17	43093457	G	A	H692Y	0	0	0	0	0	0	0	0
rs80356912	17	43093351	G	A	P727L	0	0	0	0	0	0	0	0
rs80357290	17	43091950	G	A	T1194I	0	0	0	0	0	0	0	0
rs273900737	17	43074363	G	A	T1569M	0	0	0	0	0	0	0	0
rs80357076	17	43074357	G	A	T1571I	0	0	0	0	0	0	0	0
rs876659163	17	43071058	G	A	T1640I	0	0	0	0	0	0	0	0
rs41293457	17	43074381	G	C	S1563C	0	0	0	0	0	0	0	0
rs587782134	17	43092874	G	C	S886C	0	0	0	0	0	0	0	0
rs786202757	17	43093293	G	T	D746E	0	0	0	0	0	0	0	0
rs80357182	17	43093408	G	T	S708Y	0	0	0	0	0	0	0	0
rs876659001	17	43074360	T	A	E1570V	0	0	0	0	0	0	0	0
rs80357420	17	43092839	T	C	K898E	0	0	0	0	0	0	0	0
rs876659928	17	43092290	T	C	N1081D	0	0	0	0	0	0	0	0
rs587782123	17	43094804	T	C	N243D	0	0	0	0	0	0	0	0
rs398122639	17	43093922	T	C	N537D	0	0	0	0	0	0	0	0
rs1064795217	17	43093882	T	C	N550S	0	0	0	0	0	0	0	0
rs760877199	17	43092761	T	C	N924D	0	0	0	0	0	0	0	0
rs587781641	17	43092626	T	C	N969D	0	0	0	0	0	0	0	0
rs483353090	17	43091755	T	G	N1259T	0	0	0	0	0	0	0	0
rs776512377	17	43092709	T	G	N941T	0	0	0	0	0	0	0	0
rs80357183	17	43045685	T	A	H1883L	0	0	1	0	0	0	0	1
rs730881467	17	43094802	A	C	N243K	1	0	0	0	0	0	0	1
rs746949187	17	43092013	C	T	S1173N	1	0	0	0	0	0	0	1
rs80356917	17	43074375	G	A	P1565L	1	0	0	0	0	0	0	1
rs1209769958	17	43079336	G	A	S1474L	1	0	0	0	0	0	0	1
rs80356881	17	43074454	G	T	Q1539K	1	0	0	0	0	0	0	1
rs1060502329	17	43093825	T	A	N569I	1	0	0	0	0	0	0	1
rs864622588	17	43092784	T	A	N916I	1	0	0	0	0	0	0	1
rs398122666	17	43092785	T	A	N916Y	1	0	0	0	0	0	0	1
rs767246037	17	43091470	T	G	N1354T	1	0	0	0	0	0	0	1
rs762068981	17	43079354	C	A	R1468M	0	0	0	1	0	0	0	1
rs762068981	17	43079354	C	T	R1468K	0	0	0	1	0	0	0	1
rs761585448	17	43045686	G	A	H1883Y	0	0	1	0	0	0	0	1
rs201196020	17	43045691	T	G	H1881P	0	0	1	0	0	0	0	1
rs765656957	17	43045698	T	G	I1879L	0	0	0	1	0	0	0	1
rs397507235	17	43074368	A	C	D1567E	0	0	1	0	0	0	0	1
rs80357033	17	43106467	A	C	D67E	0	0	1	0	0	0	0	1
rs80357400	17	43094073	A	C	F486L	0	0	0	1	0	0	0	1
rs750107618	17	43091577	A	C	I1318M	0	0	0	1	0	0	0	1
rs754398271	17	43093964	A	C	L523V	0	0	0	1	0	0	0	1
rs1465630651	17	43092708	A	C	N941K	0	0	0	1	0	0	0	1
rs730881480	17	43093272	A	C	S753R	0	0	1	0	0	0	0	1
rs876660550	17	43076542	A	G	F1498S	0	0	0	1	0	0	0	1
rs774159828	17	43094074	A	G	F486S	0	0	0	1	0	0	0	1
rs80357159	17	43093819	A	G	I571T	0	0	0	1	0	0	0	1
rs397508976	17	43092997	A	G	I845T	0	0	0	1	0	0	0	1
rs80356872	17	43092610	A	G	L974S	0	0	0	1	0	0	0	1
rs4986854	17	43071031	A	G	M1649T	0	0	0	1	0	0	0	1
rs80356895	17	43093525	A	G	M669T	0	0	0	1	0	0	0	1
rs1252889664	17	43093409	A	G	S708P	0	0	1	0	0	0	0	1
rs748812609	17	43094071	A	G	V487A	0	0	0	1	0	0	0	1
rs1234701709	17	43093240	A	G	V764A	0	0	0	1	0	0	0	1
rs757440752	17	43092943	A	G	V863A	0	0	0	1	0	0	0	1
rs80357008	17	43092772	A	G	V920A	0	0	0	1	0	0	0	1
rs786202106	17	43090985	A	T	C1382S	0	0	0	1	0	0	0	1
rs1281191417	17	43093905	A	T	N542K	0	0	0	1	0	0	0	1
rs431825408	17	43076589	A	T	S1482R	0	0	0	1	0	0	0	1
rs1325644035	17	43071131	A	T	S1616T	0	0	0	1	0	0	0	1
rs777916645	17	43094003	A	T	S510T	0	0	0	0	0	1	0	1
rs730881478	17	43093383	A	T	S716R	0	0	0	1	0	0	0	1
rs80357088	17	43095855	C	A	A221S	0	0	0	1	0	0	0	1
rs1064794098	17	43094216	C	A	A439S	0	0	0	1	0	0	0	1
rs752198747	17	43094488	C	A	C348F	0	0	0	0	1	0	0	1
rs80357102	17	43106469	C	A	D67Y	0	0	0	1	0	0	0	1
rs431825399	17	43091757	C	A	E1258D	0	0	0	1	0	0	0	1
rs1283231905	17	43094325	C	A	E402D	0	0	0	1	0	0	0	1
rs748674194	17	43091483	C	A	G1350C	0	0	0	1	0	0	0	1
rs864622265	17	43074365	C	A	L1568F	0	0	0	1	0	0	0	1
rs11658785	17	43094764	C	A	R256M	0	0	0	1	0	0	0	1
rs949577051	17	43076495	C	A	V1514L	0	0	0	1	0	0	0	1
rs876660885	17	43093127	C	A	V802L	0	0	1	0	0	0	0	1
rs80357361	17	43092773	C	A	V920L	0	0	0	1	0	0	0	1
rs80357101	17	43092107	C	G	A1142P	0	0	1	0	0	0	0	1
rs1188628175	17	43071197	C	G	D1594H	0	0	0	1	0	0	0	1
rs1414264431	17	43104232	C	G	E111Q	0	0	0	1	0	0	0	1
rs587782370	17	43092893	C	G	E880Q	0	0	0	1	0	0	0	1
rs80357035	17	43092821	C	G	E904Q	0	0	0	1	0	0	0	1
rs80357172	17	43092271	C	G	G1087A	0	0	1	0	0	0	0	1
rs876659133	17	43092061	C	G	G1157A	0	0	0	1	0	0	0	1
rs80357294	17	43091918	C	G	G1205R	0	0	0	1	0	0	0	1
rs587782708	17	43076560	C	G	G1492A	0	0	0	1	0	0	0	1
rs397507184	17	43094329	C	G	G401A	0	0	0	1	0	0	0	1
rs55678461	17	43093557	C	G	M658I	0	0	0	1	0	0	0	1
rs786203524	17	43076537	C	G	V1500L	0	0	0	1	0	0	0	1
rs1064796463	17	43091027	C	T	A1368T	0	0	0	1	0	0	0	1
rs1135401828	17	43076531	C	T	A1502T	0	0	0	1	0	0	0	1
rs774505084	17	43071035	C	T	A1648T	0	0	0	1	0	0	0	1
rs80357212	17	43047643	C	T	A1844T	0	0	0	1	0	0	0	1
rs1064794098	17	43094216	C	T	A439T	0	0	0	1	0	0	0	1
rs80357122	17	43093970	C	T	A521T	0	0	0	1	0	0	0	1
rs761178502	17	43093961	C	T	A524T	0	0	0	1	0	0	0	1
rs786203435	17	43093301	C	T	A744T	0	0	0	1	0	0	0	1
rs80357144	17	43093115	C	T	A806T	0	0	0	1	0	0	0	1
rs879254079	17	43091779	C	T	C1251Y	0	0	0	0	1	0	0	1
rs752198747	17	43094488	C	T	C348Y	0	0	0	0	1	0	0	1
rs1238452758	17	43092550	C	T	C994Y	0	0	1	0	0	0	0	1
rs55975699	17	43094837	C	T	D232N	0	1	0	0	0	0	0	1
rs756987689	17	43094510	C	T	D341N	0	0	0	1	0	0	0	1
rs80357301	17	43094300	C	T	D411N	0	0	0	1	0	0	0	1
rs80357148	17	43076492	C	T	E1515K	0	0	0	1	0	0	0	1
rs200432771	17	43071011	C	T	E1656K	0	0	0	1	0	0	0	1
rs876659852	17	43093346	C	T	E729K	0	0	0	1	0	0	0	1
rs397508988	17	43092890	C	T	E881K	0	0	0	1	0	0	0	1
rs878854945	17	43092314	C	T	G1073S	0	0	0	1	0	0	0	1
rs1472194405	17	43091981	C	T	G1184R	0	0	0	1	0	0	0	1
rs55725337	17	43091930	C	T	G1201S	0	0	0	1	0	0	0	1
rs431825403	17	43091576	C	T	G1319S	0	0	0	1	0	0	0	1
rs1433564897	17	43091482	C	T	G1350D	0	0	0	1	0	0	0	1
rs748674194	17	43091483	C	T	G1350S	0	0	0	1	0	0	0	1
rs786203545	17	43090978	C	T	G1384E	0	0	1	0	0	0	0	1
rs1173323937	17	43079385	C	T	G1458S	0	0	0	1	0	0	0	1
rs587782825	17	43071143	C	T	G1612S	0	0	0	1	0	0	0	1
rs397507184	17	43094329	C	T	G401E	0	0	0	1	0	0	0	1
rs80357200	17	43092863	C	T	G890R	0	0	0	1	0	0	0	1
rs80357195	17	43092990	C	T	M847I	0	0	0	1	0	0	0	1
rs876658464	17	43092496	C	T	R1012K	0	0	0	1	0	0	0	1
rs921253348	17	43091557	C	T	R1325K	0	0	0	1	0	0	0	1
rs752624544	17	43071166	C	T	R1604K	0	0	0	1	0	0	0	1
rs398122694	17	43051110	C	T	R1783K	0	0	0	1	0	0	0	1
rs876659731	17	43093063	C	T	R823K	0	0	0	1	0	0	0	1
rs779153035	17	43092655	C	T	R959K	0	0	0	1	0	0	0	1
rs1294360179	17	43091998	C	T	S1178N	0	0	0	0	0	1	0	1
rs80356975	17	43091971	C	T	S1187N	0	0	1	0	0	0	0	1
rs1060502348	17	43091797	C	T	S1245N	0	0	0	1	0	0	0	1
rs577465138	17	43076515	C	T	S1507N	0	0	0	0	0	1	0	1
rs273901742	17	43071022	C	T	S1652N	0	0	1	0	0	0	0	1
rs397509322	17	43094740	C	T	S264N	0	0	0	1	0	0	0	1
rs1465372282	17	43094584	C	T	S316N	0	0	0	0	0	1	0	1
rs1485510803	17	43094230	C	T	S434N	0	0	0	1	0	0	0	1
rs80357181	17	43094170	C	T	S454N	0	0	0	1	0	0	0	1
rs779748579	17	43093465	C	T	S689N	0	0	0	1	0	0	0	1
rs431825388	17	43093450	C	T	S694N	0	0	1	0	0	0	0	1
rs56336919	17	43091990	C	T	V1181I	0	0	0	1	0	0	0	1
rs80357191	17	43091792	C	T	V1247I	0	0	0	1	0	0	0	1
rs762908108	17	43091510	C	T	V1341I	0	0	0	1	0	0	0	1
rs786201658	17	43074412	C	T	V1553I	0	0	0	1	0	0	0	1
rs55815649	17	43074406	C	T	V1555M	0	0	0	1	0	0	0	1
rs770193975	17	43071020	C	T	V1653M	0	0	0	1	0	0	0	1
rs959797914	17	43094834	C	T	V233I	0	0	0	1	0	0	0	1
rs587776478	17	43094297	C	T	V412I	0	0	0	1	0	0	0	1
rs587782770	17	43094288	C	T	V415I	0	0	0	1	0	0	0	1
rs587782784	17	43094192	C	T	V447I	0	0	0	1	0	0	0	1
rs876660889	17	43093553	C	T	V660I	0	0	0	1	0	0	0	1
rs768904580	17	43093241	C	T	V764I	0	0	0	1	0	0	0	1
rs528902306	17	43124075	C	T	V8I	0	0	0	1	0	0	0	1
rs80357361	17	43092773	C	T	V920I	0	0	0	1	0	0	0	1
rs1324340897	17	43092764	C	T	V923I	0	0	0	1	0	0	0	1
rs762589415	17	43092737	C	T	V932I	0	0	0	1	0	0	0	1
rs1339736533	17	43091788	G	A	A1248V	0	0	0	0	0	1	0	1
rs730881489	17	43091701	G	A	A1277V	0	0	0	1	0	0	0	1
rs1385360559	17	43091026	G	A	A1368V	0	0	0	1	0	0	0	1
rs80357072	17	43071091	G	A	A1629V	0	1	0	0	0	0	0	1
rs764015648	17	43071034	G	A	A1648V	0	0	0	1	0	0	0	1
rs765681061	17	43045802	G	A	A1844V	0	0	0	1	0	0	0	1
rs876658636	17	43094500	G	A	A344V	0	0	0	1	0	0	0	1
rs80357333	17	43093960	G	A	A524V	0	0	0	1	0	0	0	1
rs1335137805	17	43124083	G	A	A5V	0	0	0	1	0	0	0	1
rs1042173379	17	43104214	G	A	H117Y	0	1	0	0	0	0	0	1
rs758539222	17	43067665	G	A	H1694Y	0	0	0	0	1	0	0	1
rs751656678	17	43093028	G	A	H835Y	0	0	1	0	0	0	0	1
rs80357480	17	43092869	G	A	H888Y	0	0	1	0	0	0	0	1
rs878854958	17	43049144	G	A	L1816F	0	0	0	1	0	0	0	1
rs1282963652	17	43094120	G	A	L471F	0	0	0	1	0	0	0	1
rs1057519249	17	43092503	G	A	P1010S	0	0	0	1	0	0	0	1
rs45599040	17	43092215	G	A	P1106S	0	0	0	1	0	0	0	1
rs768327850	17	43082488	G	A	P1425S	0	0	0	1	0	0	0	1
rs80357466	17	43082473	G	A	P1430S	0	0	0	1	0	0	0	1
rs886041143	17	43104129	G	A	P145L	0	0	0	1	0	0	0	1
rs56335406	17	43074501	G	A	P1523L	0	0	0	1	0	0	0	1
rs80357383	17	43074502	G	A	P1523S	0	0	0	1	0	0	0	1
rs1390166929	17	43074439	G	A	P1544S	0	0	0	1	0	0	0	1
rs70953660	17	43071074	G	A	P1635S	0	0	0	1	0	0	0	1
rs80357048	17	43071004	G	A	P1658L	0	0	0	0	0	1	0	1
rs80357274	17	43045704	G	A	P1877S	0	0	0	1	0	0	0	1
rs201596327	17	43095890	G	A	P209L	0	0	0	1	0	0	0	1
rs730881466	17	43095891	G	A	P209S	0	0	0	1	0	0	0	1
rs397508831	17	43094455	G	A	P359L	0	0	0	1	0	0	0	1
rs767666190	17	43094456	G	A	P359S	0	0	0	1	0	0	0	1
rs755122577	17	43093829	G	A	P568S	0	0	0	1	0	0	0	1
rs1064793999	17	43092718	G	A	P938L	0	0	0	1	0	0	0	1
rs1182090591	17	43092629	G	A	P968S	0	0	0	1	0	0	0	1
rs1064794043	17	43092602	G	A	P977S	0	0	0	1	0	0	0	1
rs781746476	17	43076533	G	A	S1501F	0	0	0	0	0	1	0	1
rs397508833	17	43094449	G	A	S361L	0	0	1	0	0	0	0	1
rs80356934	17	43094323	G	A	S403F	0	0	1	0	0	0	0	1
rs80356944	17	43091944	G	A	T1196I	0	0	0	1	0	0	0	1
rs80357374	17	43093915	G	A	T539M	0	0	0	1	0	0	0	1
rs1161074446	17	43093252	G	A	T760I	0	0	0	1	0	0	0	1
rs80357073	17	43094125	G	C	A469G	0	0	0	1	0	0	0	1
rs730881445	17	43082456	G	C	D1435E	0	0	0	1	0	0	0	1
rs373686790	17	43074371	G	C	H1566Q	0	0	0	1	0	0	0	1
rs80357452	17	43093731	G	C	I600M	0	0	0	1	0	0	0	1
rs876659315	17	43104211	G	C	L118V	0	0	0	1	0	0	0	1
rs775424259	17	43093433	G	C	L700V	0	0	0	1	0	0	0	1
rs80357080	17	43092614	G	C	L973V	0	0	0	1	0	0	0	1
rs1348911931	17	43082480	G	C	N1427K	0	0	0	1	0	0	0	1
rs1316419984	17	43093920	G	C	N537K	0	0	0	1	0	0	0	1
rs768327850	17	43082488	G	C	P1425A	0	0	0	1	0	0	0	1
rs142074233	17	43093931	G	C	Q534E	0	0	0	0	0	1	0	1
rs863224759	17	43092175	G	C	T1119S	0	0	0	1	0	0	0	1
rs80357099	17	43091785	G	C	T1249S	0	0	0	1	0	0	0	1
rs786202573	17	43071049	G	C	T1643S	0	0	0	1	0	0	0	1
rs764499766	17	43095893	G	C	T208S	0	0	0	1	0	0	0	1
rs80356990	17	43094824	G	C	T236S	0	0	0	1	0	0	0	1
rs776070899	17	43091679	G	T	H1284Q	0	0	0	1	0	0	0	1
rs773212667	17	43093676	G	T	H619N	0	0	0	1	0	0	0	1
rs80357478	17	43092620	G	T	H971N	0	0	0	1	0	0	0	1
rs200582930	17	43076558	G	T	L1493I	0	0	0	1	0	0	0	1
rs397509004	17	43092803	G	T	Q910K	0	0	0	1	0	0	0	1
rs80356944	17	43091944	G	T	T1196K	0	0	0	1	0	0	0	1
rs587782094	17	43094818	T	A	H238L	0	0	0	1	0	0	0	1
rs1391565083	17	43092553	T	A	K993I	0	0	0	1	0	0	0	1
rs587782241	17	43091561	T	A	M1324L	0	0	0	1	0	0	0	1
rs80356894	17	43091879	T	A	S1218C	0	0	0	0	0	1	0	1
rs1340335862	17	43091945	T	A	T1196S	0	0	0	1	0	0	0	1
rs1323940169	17	43092025	T	C	D1169G	0	0	0	1	0	0	0	1
rs876660809	17	43082457	T	C	D1435G	0	0	0	1	0	0	0	1
rs55680408	17	43095875	T	C	D214G	0	0	0	1	0	0	0	1
rs949793708	17	43082409	T	C	E1451G	0	0	0	1	0	0	0	1
rs922908090	17	43093267	T	C	E755G	0	0	0	1	0	0	0	1
rs80357047	17	43091683	T	C	H1283R	0	0	0	1	0	0	0	1
rs1277159752	17	43071061	T	C	H1639R	0	0	0	1	0	0	0	1
rs587782094	17	43094818	T	C	H238R	0	0	0	1	0	0	0	1
rs771890863	17	43093675	T	C	H619R	0	0	0	1	0	0	0	1
rs80357271	17	43092401	T	C	I1044V	0	0	0	1	0	0	0	1
rs1064795478	17	43092359	T	C	I1058V	0	0	0	1	0	0	0	1
rs273899708	17	43092023	T	C	I1170V	0	0	0	1	0	0	0	1
rs80357280	17	43091708	T	C	I1275V	0	0	0	1	0	0	0	1
rs397509121	17	43091579	T	C	I1318V	0	0	0	1	0	0	0	1
rs80357157	17	43082467	T	C	I1432V	0	0	0	1	0	0	0	1
rs541512953	17	43082464	T	C	I1433V	0	0	0	1	0	0	0	1
rs775348455	17	43079340	T	C	I1473V	0	0	0	1	0	0	0	1
rs777515082	17	43099811	T	C	I171V	0	0	0	1	0	0	0	1
rs786202721	17	43047691	T	C	I1828V	0	0	0	1	0	0	0	1
rs373218165	17	43094414	T	C	I373V	0	0	0	1	0	0	0	1
rs552505690	17	43093818	T	C	I571M	0	0	0	1	0	0	0	1
rs1310719199	17	43093820	T	C	I571V	0	0	0	1	0	0	0	1
rs749896277	17	43093583	T	C	I650V	0	0	0	1	0	0	0	1
rs80356948	17	43093184	T	C	I783V	0	0	0	1	0	0	0	1
rs747649874	17	43092998	T	C	I845V	0	0	0	1	0	0	0	1
rs1274520145	17	43092635	T	C	I966V	0	0	0	1	0	0	0	1
rs587781880	17	43076506	T	C	K1510R	0	0	0	1	0	0	0	1
rs201810810	17	43070971	T	C	K1669R	0	0	0	1	0	0	0	1
rs397509306	17	43095848	T	C	K223R	0	0	0	1	0	0	0	1
rs397508826	17	43094519	T	C	K338E	0	0	0	1	0	0	0	1
rs397508929	17	43093517	T	C	K672E	0	0	0	1	0	0	0	1
rs876658307	17	43093429	T	C	K701R	0	0	0	1	0	0	0	1
rs80357147	17	43093376	T	C	K719E	0	0	0	1	0	0	0	1
rs1415985638	17	43093339	T	C	K731R	0	0	0	1	0	0	0	1
rs397507204	17	43092796	T	C	K912R	0	0	0	1	0	0	0	1
rs778118145	17	43092691	T	C	K947R	0	0	0	1	0	0	0	1
rs771479616	17	43092122	T	C	M1137V	0	0	0	1	0	0	0	1
rs55932871	17	43093559	T	C	M658V	0	0	0	1	0	0	0	1
rs753286589	17	43092445	T	C	N1029S	0	0	0	1	0	0	0	1
rs753440254	17	43092289	T	C	N1081S	0	0	0	1	0	0	0	1
rs80356919	17	43092169	T	C	N1121S	0	0	0	1	0	0	0	1
rs587780800	17	43104225	T	C	N113S	0	0	0	1	0	0	0	1
rs786203310	17	43091887	T	C	N1215S	0	0	0	1	0	0	0	1
rs863224760	17	43091824	T	C	N1236S	0	0	0	1	0	0	0	1
rs273900716	17	43091728	T	C	N1268S	0	0	0	1	0	0	0	1
rs772703445	17	43091716	T	C	N1272S	0	0	0	1	0	0	0	1
rs876660530	17	43091468	T	C	N1355D	0	0	0	1	0	0	0	1
rs766962460	17	43074450	T	C	N1540S	0	0	0	1	0	0	0	1
rs80357171	17	43063337	T	C	N1751S	0	0	0	1	0	0	0	1
rs80357286	17	43047654	T	C	N1840S	0	0	0	1	0	0	0	1
rs767720128	17	43094792	T	C	N247D	0	0	0	1	0	0	0	1
rs80357113	17	43094281	T	C	N417S	0	0	0	1	0	0	0	1
rs587781315	17	43093826	T	C	N569D	0	0	0	1	0	0	0	1
rs786203455	17	43093565	T	C	N656D	0	0	1	0	0	0	0	1
rs876658733	17	43093307	T	C	N742D	0	0	0	1	0	0	0	1
rs1060499618	17	43093306	T	C	N742S	0	0	0	1	0	0	0	1
rs587782027	17	43093135	T	C	N799S	0	0	0	1	0	0	0	1
rs776512377	17	43092709	T	C	N941S	0	0	0	1	0	0	0	1
rs879254130	17	43092649	T	C	N961S	0	0	0	1	0	0	0	1
rs1060502363	17	43091539	T	C	Q1331R	0	0	0	1	0	0	0	1
rs70953659	17	43074396	T	C	Q1558R	0	0	0	1	0	0	0	1
rs397509321	17	43094741	T	C	S264G	0	0	0	1	0	0	0	1
rs730881472	17	43093880	T	C	S551G	0	0	0	1	0	0	0	1
rs876660188	17	43093466	T	C	S689G	0	0	0	1	0	0	0	1
rs377475866	17	43093013	T	C	S840G	0	0	0	1	0	0	0	1
rs769456095	17	43092044	T	C	T1163A	0	0	0	1	0	0	0	1
rs369982706	17	43091951	T	C	T1194A	0	0	0	1	0	0	0	1
rs587776488	17	43091795	T	C	T1246A	0	0	0	1	0	0	0	1
rs80357187	17	43071125	T	C	T1618A	0	0	0	1	0	0	0	1
rs878854929	17	43094432	T	C	T367A	0	0	0	1	0	0	0	1
rs1238203770	17	43094006	T	C	T509A	0	0	0	1	0	0	0	1
rs397508895	17	43093862	T	C	T557A	0	0	0	1	0	0	0	1
rs397508906	17	43093787	T	C	T582A	0	0	0	1	0	0	0	1
rs45564238	17	43093682	T	C	T617A	0	0	0	1	0	0	0	1
rs1268006720	17	43093505	T	C	T676A	0	0	0	1	0	0	0	1
rs80357441	17	43093445	T	C	T696A	0	0	0	1	0	0	0	1
rs876658243	17	43092186	T	G	E1115D	0	0	0	1	0	0	0	1
rs730881470	17	43094218	T	G	E438A	0	0	0	1	0	0	0	1
rs1375255651	17	43093912	T	G	E540A	0	0	0	1	0	0	0	1
rs876660463	17	43093336	T	G	E732A	0	0	0	1	0	0	0	1
rs876660266	17	43093296	T	G	E745D	0	0	0	1	0	0	0	1
rs876658843	17	43092868	T	G	H888P	0	0	1	0	0	0	0	1
rs80357448	17	43104193	T	G	I124L	0	0	0	1	0	0	0	1
rs777515082	17	43099811	T	G	I171L	0	0	0	1	0	0	0	1
rs80357343	17	43091567	T	G	K1322Q	0	1	0	0	0	0	0	1
rs273901743	17	43099819	T	G	K168T	0	0	0	0	0	1	0	1
rs587781737	17	43094515	T	G	K339T	0	0	0	1	0	0	0	1
rs1475423886	17	43093329	T	G	K734N	0	0	0	1	0	0	0	1
rs397508968	17	43093097	T	G	K812Q	0	0	0	1	0	0	0	1
rs80357170	17	43092854	T	G	K893Q	0	0	1	0	0	0	0	1
rs397509010	17	43092779	T	G	K918Q	0	0	0	1	0	0	0	1
rs876660526	17	43092170	T	G	N1121H	0	0	0	1	0	0	0	1
rs587781765	17	43092116	T	G	S1139R	0	0	1	0	0	0	0	1
rs1064795449	17	43091666	T	G	T1289P	0	0	0	1	0	0	0	1
rs80357231	17	43091486	T	G	T1349P	0	0	0	1	0	0	0	1
rs755427809	17	43045697	A	G	I1879T	0	1	0	1	0	0	0	2
rs876659941	17	43045696	G	C	I1879M	0	1	0	1	0	0	0	2
rs1014956762	17	43079369	G	C	S1463C	0	0	1	1	0	0	0	2
rs1317431294	17	43082463	A	C	I1433R	1	0	0	1	0	0	0	2
rs80357214	17	43094739	A	C	S264R	1	0	1	0	0	0	0	2
rs1277709335	17	43079337	A	G	S1474P	1	0	1	0	0	0	0	2
rs587782606	17	43076611	A	G	V1475A	1	0	0	1	0	0	0	2
rs769589630	17	43091499	A	T	D1344E	1	0	0	0	0	1	0	2
rs80357431	17	43074349	A	T	L1574M	1	0	0	1	0	0	0	2
rs1160287128	17	43091504	C	A	D1343Y	1	0	1	0	0	0	0	2
rs28897691	17	43074370	C	A	D1567Y	1	0	1	0	0	0	0	2
rs587781771	17	43092852	C	A	K893N	1	0	1	0	0	0	0	2
rs767544239	17	43092264	C	A	L1089F	1	0	0	1	0	0	0	2
rs80357228	17	43092115	C	A	S1139I	1	0	1	0	0	0	0	2
rs876660460	17	43074400	C	G	E1557Q	1	0	0	1	0	0	0	2
rs80357394	17	43095904	C	G	L204F	1	0	0	1	0	0	0	2
rs70953658	17	43091538	C	G	Q1331H	1	0	0	1	0	0	0	2
rs757184166	17	43082440	C	T	D1441N	1	0	0	1	0	0	0	2
rs876660267	17	43093295	C	T	D746N	1	0	0	1	0	0	0	2
rs80357237	17	43074427	C	T	E1548K	1	0	0	1	0	0	0	2
rs1414555819	17	43074379	C	T	G1564R	1	0	0	1	0	0	0	2
rs876658479	17	43092371	C	T	V1054M	1	0	0	1	0	0	0	2
rs80357060	17	43093169	C	T	V788I	1	0	0	1	0	0	0	2
rs876659903	17	43091948	G	A	H1195Y	1	0	1	0	0	0	0	2
rs1064794054	17	43071106	G	A	P1624L	1	0	0	1	0	0	0	2
rs766305255	17	43071073	G	A	P1635L	1	0	1	0	0	0	0	2
rs1060502358	17	43104126	G	A	S146F	1	0	1	0	0	0	0	2
rs1395897649	17	43071130	G	A	S1616F	1	0	1	0	0	0	0	2
rs80357051	17	43093309	G	A	S741F	1	0	1	0	0	0	0	2
rs150729791	17	43067658	G	A	T1696I	1	0	0	1	0	0	0	2
rs1238929596	17	43094431	G	A	T367I	1	0	0	1	0	0	0	2
rs1334969117	17	43093444	G	A	T696I	1	0	0	1	0	0	0	2
rs786202569	17	43091724	G	C	D1269E	1	0	1	0	0	0	0	2
rs587779367	17	43104224	G	C	N113K	1	0	0	1	0	0	0	2
rs758329415	17	43091886	G	C	N1215K	1	0	1	0	0	0	0	2
rs80356910	17	43093828	G	C	P568R	1	0	0	1	0	0	0	2
rs80356881	17	43074454	G	C	Q1539E	1	0	1	0	0	0	0	2
rs80357180	17	43099859	G	C	Q155E	1	0	0	0	0	1	0	2
rs80357051	17	43093309	G	C	S741C	1	0	1	0	0	0	0	2
rs876660309	17	43094441	G	T	P364T	1	0	0	1	0	0	0	2
rs1473461169	17	43074426	T	A	E1548V	1	0	0	1	0	0	0	2
rs398122689	17	43074417	T	A	K1551M	1	0	0	1	0	0	0	2
rs80356883	17	43106533	T	A	K45N	1	0	1	0	0	0	0	2
rs1131692093	17	43092849	T	A	K894N	1	0	1	0	0	0	0	2
rs80357127	17	43092805	T	A	N909I	1	0	1	0	0	0	0	2
rs879254151	17	43092325	T	A	Q1069L	1	0	0	0	1	0	0	2
rs1377750822	17	43076599	T	A	Q1479L	1	0	0	0	0	1	0	2
rs1485442602	17	43074338	T	A	Q1577H	1	0	0	1	0	0	0	2
rs80357255	17	43094221	T	C	H437R	1	0	0	1	0	0	0	2
rs80357388	17	43091820	T	C	I1237M	1	0	0	1	0	0	0	2
rs587781798	17	43104261	T	C	Y101C	1	0	0	0	1	0	0	2
rs1225577943	17	43092193	T	C	Y1113C	1	0	1	0	0	0	0	2
rs776278453	17	43094578	T	G	H318P	1	0	0	0	0	1	0	2
rs80357255	17	43094221	T	G	H437P	1	0	0	0	1	0	0	2
rs564375670	17	43093018	T	G	N838T	1	0	1	0	0	0	0	2
rs774284145	17	43095866	C	A	S217I	1	1	0	0	0	0	0	2
rs377475866	17	43093013	T	A	S840C	1	1	0	0	0	0	0	2
rs80357143	17	43091809	G	T	S1241Y	1	1	0	0	0	0	0	2
rs1273755215	17	43082424	T	A	E1446V	1	1	0	0	0	0	0	2
rs80357411	17	43071175	G	T	S1601Y	1	1	0	0	0	0	0	2
rs1057517571	17	43079349	T	C	R1470G	0	0	1	1	0	0	0	2
rs1334848140	17	43093625	A	C	C636G	0	0	0	1	1	0	0	2
rs397508918	17	43093599	A	C	C644W	0	0	1	1	0	0	0	2
rs80356833	17	43071101	A	C	L1626V	0	0	1	1	0	0	0	2
rs28897675	17	43094795	A	C	L246V	0	0	1	1	0	0	0	2
rs1458197554	17	43092027	A	C	N1168K	0	0	1	1	0	0	0	2
rs28897687	17	43091823	A	C	N1236K	0	0	1	1	0	0	0	2
rs80357197	17	43094280	A	C	N417K	0	0	0	1	1	0	0	2
rs879255285	17	43076514	A	C	S1507R	0	1	0	0	0	1	0	2
rs786203153	17	43092184	A	C	V1116G	0	0	1	1	0	0	0	2
rs1397965282	17	43071019	A	C	V1653G	0	0	1	1	0	0	0	2
rs398122628	17	43094275	A	C	V419G	0	0	1	1	0	0	0	2
rs786201928	17	43094489	A	G	C348R	0	0	1	0	1	0	0	2
rs766381694	17	43092425	A	G	F1036L	0	0	1	1	0	0	0	2
rs398122660	17	43093108	A	G	F808S	0	0	0	1	1	0	0	2
rs4986848	17	43092565	A	G	F989S	0	0	1	1	0	0	0	2
rs775869160	17	43094245	A	G	I429T	0	0	1	1	0	0	0	2
rs1163497041	17	43094209	A	G	I441T	0	0	1	1	0	0	0	2
rs1327980486	17	43094086	A	G	I482T	0	0	1	1	0	0	0	2
rs80357489	17	43094083	A	G	I483T	0	0	1	1	0	0	0	2
rs80356859	17	43093759	A	G	I591T	0	0	1	1	0	0	0	2
rs587781492	17	43092781	A	G	I917T	0	0	1	1	0	0	0	2
rs397507219	17	43091749	A	G	L1261S	0	0	0	1	1	0	0	2
rs1386991114	17	43093639	A	G	L631P	0	0	0	1	1	0	0	2
rs397508994	17	43092856	A	G	L892S	0	0	1	1	0	0	0	2
rs879120884	17	43092508	A	G	M1008T	0	0	1	1	0	0	0	2
rs80357297	17	43092121	A	G	M1137T	0	0	1	1	0	0	0	2
rs763596987	17	43091449	A	G	M1361T	0	0	1	1	0	0	0	2
rs80357205	17	43067694	A	G	M1684T	0	0	0	1	0	1	0	2
rs1213036734	17	43091816	A	G	S1239P	0	0	1	0	0	1	0	2
rs1011096937	17	43091747	A	G	S1262P	0	0	1	0	0	1	0	2
rs398122686	17	43076555	A	G	S1494P	0	1	0	0	0	1	0	2
rs80356909	17	43071185	A	G	S1598P	0	1	0	0	0	1	0	2
rs587781496	17	43094732	A	G	S267P	0	0	1	0	0	1	0	2
rs876658707	17	43124087	A	G	S4P	0	0	1	0	0	1	0	2
rs762310583	17	43092875	A	G	S886P	0	1	1	0	0	0	0	2
rs1468065357	17	43092665	A	G	S956P	0	0	1	0	1	0	0	2
rs397509037	17	43092391	A	G	V1047A	0	0	1	1	0	0	0	2
rs80357032	17	43091989	A	G	V1181A	0	0	1	1	0	0	0	2
rs1135401872	17	43091533	A	G	V1333A	0	0	1	1	0	0	0	2
rs786202539	17	43094305	A	G	V409A	0	0	0	1	0	1	0	2
rs1064796031	17	43094287	A	G	V415A	0	0	1	1	0	0	0	2
rs760588785	17	43092562	A	G	V990A	0	0	1	1	0	0	0	2
rs1163509151	17	43076585	A	G	Y1484H	0	0	1	1	0	0	0	2
rs764186025	17	43094267	A	G	Y422H	0	0	1	1	0	0	0	2
rs876659545	17	43092599	A	G	Y978H	0	0	1	1	0	0	0	2
rs753521391	17	43093601	A	T	C644S	0	0	1	1	0	0	0	2
rs184374817	17	43092887	A	T	C882S	0	0	1	1	0	0	0	2
rs144853230	17	43092551	A	T	C994S	0	0	1	1	0	0	0	2
rs55906931	17	43094075	A	T	F486I	0	0	1	1	0	0	0	2
rs1295122328	17	43092677	A	T	F952I	0	0	0	1	1	0	0	2
rs876659270	17	43092564	A	T	F989L	0	0	1	1	0	0	0	2
rs1345896191	17	43094676	A	T	H285Q	0	0	1	1	0	0	0	2
rs1135401826	17	43094577	A	T	H318Q	0	0	0	1	0	1	0	2
rs587782595	17	43093455	A	T	H692Q	0	0	1	1	0	0	0	2
rs562370358	17	43093183	A	T	I783N	0	0	0	1	1	0	0	2
rs730881492	17	43074367	A	T	L1568M	0	1	0	1	0	0	0	2
rs80356833	17	43071101	A	T	L1626M	0	0	1	1	0	0	0	2
rs80357404	17	43076522	A	T	S1505T	0	1	0	0	0	1	0	2
rs1384752453	17	43093688	A	T	S615T	0	1	0	0	0	1	0	2
rs80357070	17	43071164	C	A	A1605S	0	1	0	1	0	0	0	2
rs587781613	17	43093718	C	A	A605S	0	0	1	1	0	0	0	2
rs80357135	17	43092223	C	A	C1103F	0	0	1	0	1	0	0	2
rs764458412	17	43092255	C	A	E1092D	0	0	1	1	0	0	0	2
rs587779368	17	43091976	C	A	E1185D	0	0	1	1	0	0	0	2
rs1174774563	17	43071156	C	A	E1607D	0	0	1	1	0	0	0	2
rs80356980	17	43093855	C	A	G559V	0	0	1	1	0	0	0	2
rs747688901	17	43071078	C	A	Q1633H	0	0	1	1	0	0	0	2
rs397509269	17	43049172	C	A	Q1806H	0	0	1	1	0	0	0	2
rs80357459	17	43092448	C	A	R1028L	0	0	0	1	1	0	0	2
rs1453544316	17	43079377	C	A	R1460S	0	1	0	1	0	0	0	2
rs746199881	17	43071012	C	A	R1655S	0	0	1	1	0	0	0	2
rs80356884	17	43093263	C	A	R756S	0	0	1	1	0	0	0	2
rs28897690	17	43090997	C	A	V1378F	0	0	1	1	0	0	0	2
rs80357415	17	43093313	C	A	V740L	0	0	1	1	0	0	0	2
rs763639161	17	43092740	C	A	V931L	0	0	1	1	0	0	0	2
rs397509112	17	43091702	C	G	A1277P	0	0	0	1	1	0	0	2
rs398122649	17	43093624	C	G	C636S	0	0	0	1	1	0	0	2
rs28897691	17	43074370	C	G	D1567H	0	1	0	1	0	0	0	2
rs273902779	17	43095861	C	G	D219H	0	0	0	1	0	1	0	2
rs80356991	17	43104136	C	G	E143Q	0	0	1	0	0	1	0	2
rs1060502355	17	43071188	C	G	E1597Q	0	1	0	1	0	0	0	2
rs397507198	17	43093250	C	G	E761Q	0	1	0	1	0	0	0	2
rs80357149	17	43047702	C	G	G1824A	0	0	1	1	0	0	0	2
rs397509319	17	43094743	C	G	G263A	0	0	1	1	0	0	0	2
rs1064793602	17	43093927	C	G	G535A	0	1	1	0	0	0	0	2
rs786202215	17	43093031	C	G	G834R	0	0	0	1	1	0	0	2
rs80356941	17	43092733	C	G	G933A	0	0	0	1	1	0	0	2
rs768416164	17	43094793	C	G	L246F	0	0	1	1	0	0	0	2
rs55746541	17	43093119	C	G	Q804H	0	0	0	1	0	1	0	2
rs876658873	17	43094276	C	G	V419L	0	0	1	1	0	0	0	2
rs779459487	17	43092287	C	T	A1082T	0	0	0	1	0	1	0	2
rs80357036	17	43091696	C	T	A1279T	0	0	0	1	0	1	0	2
rs1040027065	17	43063949	C	T	A1714T	0	0	0	1	0	1	0	2
rs79727659	17	43094501	C	T	A344T	0	0	1	1	0	0	0	2
rs779974365	17	43094303	C	T	A410T	0	0	0	1	0	1	0	2
rs397507187	17	43094126	C	T	A469T	0	0	1	1	0	0	0	2
rs80357135	17	43092223	C	T	C1103Y	0	0	1	0	1	0	0	2
rs781212379	17	43091659	C	T	C1291Y	0	0	1	0	1	0	0	2
rs1285425507	17	43094206	C	T	C442Y	0	0	0	1	1	0	0	2
rs398122649	17	43093624	C	T	C636Y	0	0	0	1	1	0	0	2
rs80357175	17	43092077	C	T	D1152N	0	0	0	1	0	1	0	2
rs775463394	17	43091447	C	T	D1362N	0	1	1	0	0	0	0	2
rs80357109	17	43095915	C	T	D201N	0	0	0	1	0	1	0	2
rs786203797	17	43095876	C	T	D214N	0	1	0	1	0	0	0	2
rs273902779	17	43095861	C	T	D219N	0	0	0	1	0	1	0	2
rs397507259	17	43094543	C	T	D330N	0	0	0	1	0	1	0	2
rs786203145	17	43094345	C	T	D396N	0	0	1	1	0	0	0	2
rs80357102	17	43106469	C	T	D67N	0	0	1	1	0	0	0	2
rs876659974	17	43092500	C	T	E1011K	0	0	1	1	0	0	0	2
rs273899698	17	43092434	C	T	E1033K	0	0	1	1	0	0	0	2
rs397509105	17	43091759	C	T	E1258K	0	0	1	1	0	0	0	2
rs80357021	17	43091516	C	T	E1339K	0	0	0	1	0	1	0	2
rs863224762	17	43071221	C	T	E1586K	0	0	1	1	0	0	0	2
rs1060502355	17	43071188	C	T	E1597K	0	0	1	1	0	0	0	2
rs869320789	17	43045785	C	T	E1850K	0	0	0	1	1	0	0	2
rs80357472	17	43094477	C	T	E352K	0	0	1	1	0	0	0	2
rs80357083	17	43094279	C	T	E418K	0	0	1	1	0	0	0	2
rs397508902	17	43093808	C	T	E575K	0	0	1	1	0	0	0	2
rs80357029	17	43093523	C	T	E670K	0	0	1	1	0	0	0	2
rs80356875	17	43093373	C	T	E720K	0	0	1	1	0	0	0	2
rs41286296	17	43093268	C	T	E755K	0	1	0	1	0	0	0	2
rs876658552	17	43093007	C	T	E842K	0	0	1	1	0	0	0	2
rs80356978	17	43092809	C	T	E908K	0	0	1	1	0	0	0	2
rs749417532	17	43092368	C	T	G1055S	0	0	1	1	0	0	0	2
rs876660948	17	43091032	C	T	G1366D	0	0	1	1	0	0	0	2
rs398122688	17	43074462	C	T	G1536E	0	0	0	1	1	0	0	2
rs587776492	17	43049126	C	T	G1822S	0	0	0	1	1	0	0	2
rs398122698	17	43047652	C	T	G1841S	0	1	0	1	0	0	0	2
rs397509319	17	43094743	C	T	G263D	0	0	1	1	0	0	0	2
rs397509318	17	43094744	C	T	G263S	0	0	1	1	0	0	0	2
rs763051683	17	43094261	C	T	G424S	0	0	1	1	0	0	0	2
rs80357192	17	43093411	C	T	G707D	0	0	1	1	0	0	0	2
rs730881482	17	43093210	C	T	G774D	0	0	0	1	0	1	0	2
rs80357185	17	43093049	C	T	G828S	0	0	1	1	0	0	0	2
rs431825392	17	43092799	C	T	G911E	0	0	1	1	0	0	0	2
rs80356995	17	43092749	C	T	G928S	0	0	0	1	1	0	0	2
rs587782721	17	43092616	C	T	G972E	0	0	1	0	1	0	0	2
rs1800704	17	43092507	C	T	M1008I	0	0	1	1	0	0	0	2
rs786202900	17	43092120	C	T	M1137I	0	0	1	1	0	0	0	2
rs80357103	17	43094640	C	T	M297I	0	0	1	1	0	0	0	2
rs1060502340	17	43093893	C	T	M546I	0	0	1	1	0	0	0	2
rs80357459	17	43092448	C	T	R1028H	0	0	0	1	1	0	0	2
rs1437476481	17	43104156	C	T	R136K	0	0	1	1	0	0	0	2
rs786202165	17	43074342	C	T	R1576K	0	0	1	1	0	0	0	2
rs1489040931	17	43071013	C	T	R1655K	0	0	1	1	0	0	0	2
rs28897677	17	43094044	C	T	R496H	0	0	0	1	1	0	0	2
rs80357335	17	43093348	C	T	R728K	0	0	1	1	0	0	0	2
rs144792613	17	43124077	C	T	R7H	0	0	0	1	1	0	0	2
rs757579891	17	43092460	C	T	S1024N	0	0	0	1	0	1	0	2
rs4986852	17	43092412	C	T	S1040N	0	0	1	1	0	0	0	2
rs767217821	17	43092406	C	T	S1042N	0	0	0	1	0	1	0	2
rs41293447	17	43092229	C	T	S1101N	0	0	1	1	0	0	0	2
rs1057519496	17	43091629	C	T	S1301N	0	0	1	0	0	1	0	2
rs80357354	17	43082418	C	T	S1448N	0	0	1	0	0	1	0	2
rs397509167	17	43076593	C	T	S1481N	0	0	0	1	0	1	0	2
rs561998108	17	43094608	C	T	S308N	0	0	1	0	0	1	0	2
rs1462728426	17	43094560	C	T	S324N	0	0	1	0	0	1	0	2
rs786203044	17	43093756	C	T	S592N	0	0	0	1	0	1	0	2
rs587778117	17	43092254	C	T	V1093I	0	0	0	1	0	1	0	2
rs748894760	17	43092173	C	T	V1120I	0	0	0	1	0	1	0	2
rs777796838	17	43092005	C	T	V1176I	0	0	0	1	0	1	0	2
rs1064793309	17	43063889	C	T	V1734I	0	0	0	1	0	1	0	2
rs876659122	17	43057108	C	T	V1762I	0	0	0	1	0	1	0	2
rs1296005499	17	43045746	C	T	V1863I	0	0	0	1	0	1	0	2
rs80357090	17	43097266	C	T	V191I	0	0	0	1	0	1	0	2
rs80357273	17	43093958	C	T	V525I	0	0	0	1	0	1	0	2
rs397509029	17	43092563	C	T	V990I	0	0	1	1	0	0	0	2
rs1173254670	17	43092415	G	A	A1039V	0	0	1	1	0	0	0	2
rs759314330	17	43071151	G	A	A1609V	0	0	0	1	0	1	0	2
rs7502059	17	43093150	G	A	A794V	0	1	0	0	0	1	0	2
rs397508927	17	43093547	G	A	H662Y	0	1	1	0	0	0	0	2
rs879255291	17	43092239	G	A	L1098F	0	0	1	1	0	0	0	2
rs1350236972	17	43104154	G	A	L137F	0	0	1	1	0	0	0	2
rs200582930	17	43076558	G	A	L1493F	0	0	1	1	0	0	0	2
rs431825395	17	43092125	G	A	P1136S	0	0	1	1	0	0	0	2
rs876659772	17	43091819	G	A	P1238S	0	0	1	1	0	0	0	2
rs111034213	17	43076501	G	A	P1512S	0	0	1	1	0	0	0	2
rs145466894	17	43071179	G	A	P1600S	0	0	1	1	0	0	0	2
rs80357351	17	43094809	G	A	P241L	0	0	0	1	0	1	0	2
rs41286290	17	43094530	G	A	P334L	0	0	1	1	0	0	0	2
rs80357015	17	43094495	G	A	P346S	0	0	1	1	0	0	0	2
rs80357153	17	43093775	G	A	P586S	0	0	1	1	0	0	0	2
rs397508934	17	43093481	G	A	P684S	0	0	1	1	0	0	0	2
rs867654871	17	43092907	G	A	P875L	0	0	1	0	0	1	0	2
rs587776484	17	43092841	G	A	P897L	0	0	1	0	0	1	0	2
rs141465583	17	43092601	G	A	P977L	0	0	1	1	0	0	0	2
rs80357434	17	43092103	G	A	S1143F	0	0	1	0	0	1	0	2
rs80357269	17	43091746	G	A	S1262L	0	0	1	0	0	1	0	2
rs398122680	17	43091443	G	A	S1363L	0	0	1	0	0	1	0	2
rs1286565832	17	43074510	G	A	S1520F	0	0	1	0	0	1	0	2
rs879255492	17	43049137	G	A	S1818L	0	0	0	1	1	0	0	2
rs863224759	17	43092175	G	A	T1119I	0	0	1	1	0	0	0	2
rs80356918	17	43092043	G	A	T1163I	0	0	0	1	1	0	0	2
rs80356870	17	43076518	G	A	T1506I	0	0	1	1	0	0	0	2
rs587781623	17	43071124	G	A	T1618I	0	0	1	1	0	0	0	2
rs431825420	17	43094533	G	A	T333I	0	0	1	1	0	0	0	2
rs1249532992	17	43092631	G	A	T967I	0	0	1	1	0	0	0	2
rs80356862	17	43071046	G	C	A1644G	0	1	0	1	0	0	0	2
rs80356886	17	43091520	G	C	D1337E	0	1	0	0	0	1	0	2
rs786203868	17	43067660	G	C	I1695M	0	0	0	1	0	1	0	2
rs587781781	17	43093328	G	C	L735V	0	1	0	1	0	0	0	2
rs1060502344	17	43092638	G	C	L965V	0	1	0	1	0	0	0	2
rs111034213	17	43076501	G	C	P1512A	0	0	1	1	0	0	0	2
rs145466894	17	43071179	G	C	P1600A	0	1	0	1	0	0	0	2
rs80357241	17	43047694	G	C	P1827A	0	0	1	1	0	0	0	2
rs587782778	17	43045778	G	C	P1852R	0	0	0	1	1	0	0	2
rs80357015	17	43094495	G	C	P346A	0	0	1	1	0	0	0	2
rs876660543	17	43093510	G	C	P674R	0	0	1	1	0	0	0	2
rs80357456	17	43091456	G	C	Q1359E	0	0	1	0	0	1	0	2
rs80357305	17	43082503	G	C	Q1420E	0	0	0	0	0	1	1	2
rs397509267	17	43049192	G	C	Q1800E	0	0	1	0	0	1	0	2
rs80356982	17	43093121	G	C	Q804E	0	0	1	0	0	1	0	2
rs398122676	17	43091881	G	C	S1217C	0	0	1	0	0	1	0	2
rs80357213	17	43091653	G	T	A1293D	0	0	1	1	0	0	0	2
rs80357288	17	43092218	G	T	H1105N	0	0	1	1	0	0	0	2
rs1395644015	17	43094187	G	T	H448Q	0	0	1	1	0	0	0	2
rs1176222161	17	43093874	G	T	H553N	0	0	1	1	0	0	0	2
rs80356848	17	43092536	G	T	L999I	0	0	1	1	0	0	0	2
rs80357302	17	43070973	G	T	N1668K	0	0	0	1	1	0	0	2
rs431825395	17	43092125	G	T	P1136T	0	0	0	1	1	0	0	2
rs876659025	17	43092589	G	T	P981Q	0	0	0	1	1	0	0	2
rs776568544	17	43092587	G	T	P982T	0	0	1	1	0	0	0	2
rs876659614	17	43099880	G	T	Q148K	0	0	1	0	0	1	0	2
rs80356864	17	43106508	G	T	Q54K	0	0	0	1	0	1	0	2
rs80356970	17	43092596	G	T	R979S	0	0	1	1	0	0	0	2
rs876660367	17	43094526	G	T	S335R	0	0	1	0	1	0	0	2
rs80357257	17	43091602	G	T	T1310K	0	0	0	1	1	0	0	2
rs587781623	17	43071124	G	T	T1618N	0	0	1	1	0	0	0	2
rs747727601	17	43094341	T	A	D397V	0	0	1	1	0	0	0	2
rs730881469	17	43094299	T	A	D411V	0	0	0	1	1	0	0	2
rs80357396	17	43094815	T	A	H239L	0	0	1	1	0	0	0	2
rs765323349	17	43094479	T	A	K351I	0	0	1	1	0	0	0	2
rs80356831	17	43091748	T	A	L1261F	0	1	0	1	0	0	0	2
rs397507256	17	43094786	T	A	T249S	0	0	1	1	0	0	0	2
rs730881477	17	43093388	T	A	T715S	0	0	0	1	0	1	0	2
rs273899690	17	43092632	T	A	T967S	0	0	1	1	0	0	0	2
rs80357193	17	43093567	T	A	Y655F	0	0	1	0	0	1	0	2
rs398122708	17	43094836	T	C	D232G	0	0	1	1	0	0	0	2
rs756748588	17	43093453	T	C	D693G	0	0	1	1	0	0	0	2
rs16941	17	43092418	T	C	E1038G	0	0	1	1	0	0	0	2
rs751368643	17	43092256	T	C	E1092G	0	0	1	1	0	0	0	2
rs397507225	17	43091458	T	C	E1358G	0	0	0	1	0	1	0	2
rs758779691	17	43076491	T	C	E1515G	0	0	1	1	0	0	0	2
rs483353096	17	43071088	T	C	E1630G	0	0	1	1	0	0	0	2
rs80357016	17	43070983	T	C	E1665G	0	0	1	1	0	0	0	2
rs111539978	17	43093807	T	C	E575G	0	0	1	1	0	0	0	2
rs747287311	17	43092826	T	C	E902G	0	0	1	1	0	0	0	2
rs28897685	17	43091947	T	C	H1195R	0	0	1	1	0	0	0	2
rs80357499	17	43091680	T	C	H1284R	0	1	0	1	0	0	0	2
rs1064793913	17	43067664	T	C	H1694R	0	0	0	1	1	0	0	2
rs80357396	17	43094815	T	C	H239R	0	0	1	1	0	0	0	2
rs587780794	17	43094335	T	C	H399R	0	0	1	1	0	0	0	2
rs55720177	17	43094104	T	C	H476R	0	0	1	1	0	0	0	2
rs748431827	17	43093873	T	C	H553R	0	0	1	1	0	0	0	2
rs371631805	17	43093729	T	C	H601R	0	0	1	1	0	0	0	2
rs80357494	17	43093546	T	C	H662R	0	0	1	1	0	0	0	2
rs80357108	17	43093084	T	C	H816R	0	0	1	1	0	0	0	2
rs765157365	17	43093027	T	C	H835R	0	0	1	1	0	0	0	2
rs80357311	17	43092476	T	C	I1019V	0	0	1	1	0	0	0	2
rs1468925322	17	43092455	T	C	I1026V	0	0	1	1	0	0	0	2
rs786203979	17	43092440	T	C	I1031V	0	0	1	1	0	0	0	2
rs876658318	17	43092056	T	C	I1159V	0	0	1	1	0	0	0	2
rs80357448	17	43104193	T	C	I124V	0	0	1	1	0	0	0	2
rs80357353	17	43082548	T	C	I1405V	0	0	0	1	0	1	0	2
rs80357119	17	43071212	T	C	I1589V	0	0	1	1	0	0	0	2
rs1050371477	17	43067662	T	C	I1695V	0	0	0	1	0	1	0	2
rs886039314	17	43051099	T	C	I1787V	0	0	0	1	0	1	0	2
rs80356981	17	43093889	T	C	I548V	0	0	1	1	0	0	0	2
rs1064795358	17	43093760	T	C	I591V	0	0	1	1	0	0	0	2
rs1334134701	17	43092782	T	C	I917V	0	0	1	1	0	0	0	2
rs4986847	17	43092758	T	C	I925V	0	0	1	1	0	0	0	2
rs80357455	17	43091912	T	C	K1207E	0	0	1	1	0	0	0	2
rs80357362	17	43091771	T	C	K1254E	0	0	1	1	0	0	0	2
rs80357254	17	43091663	T	C	K1290E	0	0	1	1	0	0	0	2
rs12946486	17	43091519	T	C	K1338E	0	0	1	1	0	0	0	2
rs764016240	17	43074418	T	C	K1551E	0	0	1	1	0	0	0	2
rs398122705	17	43095851	T	C	K222R	0	0	1	1	0	0	0	2
rs1216516227	17	43094612	T	C	K307E	0	0	1	1	0	0	0	2
rs55842957	17	43094516	T	C	K339E	0	0	1	1	0	0	0	2
rs80357253	17	43094309	T	C	K408E	0	0	1	1	0	0	0	2
rs113656989	17	43094029	T	C	K501R	0	0	0	1	0	1	0	2
rs80356928	17	43093784	T	C	K583E	0	0	1	1	0	0	0	2
rs80357355	17	43093571	T	C	K654E	0	0	1	1	0	0	0	2
rs747046197	17	43093400	T	C	K711E	0	0	1	1	0	0	0	2
rs760810832	17	43093289	T	C	K748E	0	0	1	1	0	0	0	2
rs56082113	17	43093073	T	C	K820E	0	0	1	1	0	0	0	2
rs786202898	17	43092544	T	C	K996R	0	0	1	1	0	0	0	2
rs771606902	17	43045791	T	C	M1848V	0	0	1	1	0	0	0	2
rs587782390	17	43093895	T	C	M546V	0	0	1	1	0	0	0	2
rs561988641	17	43093526	T	C	M669V	0	0	1	1	0	0	0	2
rs80356900	17	43092226	T	C	N1102S	0	0	0	1	0	1	0	2
rs587782017	17	43104229	T	C	N112D	0	0	0	1	0	1	0	2
rs530464947	17	43092137	T	C	N1132D	0	0	1	1	0	0	0	2
rs864622233	17	43091600	T	C	N1311D	0	0	1	1	0	0	0	2
rs1395515080	17	43079375	T	C	N1461S	0	1	0	1	0	0	0	2
rs778707598	17	43076569	T	C	N1489S	0	0	0	1	0	1	0	2
rs397507258	17	43094575	T	C	N319S	0	0	0	1	0	1	0	2
rs80357057	17	43094113	T	C	N473S	0	0	0	1	0	1	0	2
rs786204263	17	43093933	T	C	N533S	0	0	0	1	0	1	0	2
rs1438140067	17	43106510	T	C	N53S	0	1	0	0	0	1	0	2
rs397508925	17	43093564	T	C	N656S	0	0	1	1	0	0	0	2
rs568312345	17	43093391	T	C	N714D	0	0	1	1	0	0	0	2
rs4986845	17	43093364	T	C	N723D	0	0	1	1	0	0	0	2
rs1212635015	17	43093304	T	C	N743D	0	0	1	1	0	0	0	2
rs1485586275	17	43093060	T	C	N824S	0	0	0	1	0	1	0	2
rs786203689	17	43092901	T	C	N877S	0	0	0	1	0	1	0	2
rs786203386	17	43074432	T	C	Q1546R	0	1	0	1	0	0	0	2
rs587781914	17	43092847	T	C	Q895R	0	0	1	1	0	0	0	2
rs2227945	17	43092113	T	C	S1140G	0	0	1	1	0	0	0	2
rs28897674	17	43099865	T	C	S153G	0	0	1	1	0	0	0	2
rs1799966	17	43071077	T	C	S1634G	0	0	0	1	0	1	0	2
rs786203753	17	43094231	T	C	S434G	0	0	1	1	0	0	0	2
rs398122656	17	43093229	T	C	S768G	0	0	1	1	0	0	0	2
rs1420399110	17	43093001	T	C	S844G	0	0	1	1	0	0	0	2
rs576828558	17	43091003	T	C	T1376A	0	0	0	1	0	1	0	2
rs8176219	17	43071056	T	C	T1641A	0	0	1	1	0	0	0	2
rs786202026	17	43071050	T	C	T1643A	0	1	0	1	0	0	0	2
rs967624732	17	43097269	T	C	T190A	0	0	0	1	0	1	0	2
rs786201634	17	43094534	T	C	T333A	0	0	1	1	0	0	0	2
rs80357120	17	43092881	T	C	T884A	0	0	1	1	0	0	0	2
rs876659228	17	43082475	T	C	Y1429C	0	0	1	0	0	1	0	2
rs730881494	17	43071040	T	C	Y1646C	0	0	1	0	1	0	0	2
rs1060502331	17	43106468	T	G	D67A	0	0	1	1	0	0	0	2
rs1371814796	17	43074359	T	G	E1570D	0	0	1	1	0	0	0	2
rs765189603	17	43071157	T	G	E1607A	0	1	0	1	0	0	0	2
rs397507196	17	43093324	T	G	E736A	0	1	0	1	0	0	0	2
rs80356869	17	43093249	T	G	E761A	0	0	1	1	0	0	0	2
rs398122665	17	43092825	T	G	E902D	0	0	1	1	0	0	0	2
rs771890863	17	43093675	T	G	H619P	0	0	1	0	1	0	0	2
rs398122689	17	43074417	T	G	K1551T	0	0	1	1	0	0	0	2
rs397507190	17	43093859	T	G	K558Q	0	0	1	1	0	0	0	2
rs1302678544	17	43092728	T	G	K935Q	0	0	1	1	0	0	0	2
rs431825394	17	43092621	T	G	K970N	0	0	1	1	0	0	0	2
rs876660683	17	43092558	T	G	K991N	0	0	1	0	0	1	0	2
rs730881487	17	43092609	T	G	L974F	0	0	1	1	0	0	0	2
rs80357196	17	43094642	T	G	M297L	0	0	1	1	0	0	0	2
rs1060502351	17	43093892	T	G	N547H	0	0	1	1	0	0	0	2
rs786203786	17	43092650	T	G	N961H	0	0	0	1	1	0	0	2
rs80357376	17	43094059	T	G	Q491P	0	0	0	1	1	0	0	2
rs587782743	17	43092654	T	G	R959S	0	0	1	1	0	0	0	2
rs377475866	17	43093013	T	G	S840R	0	0	1	0	1	0	0	2
rs879255288	17	43094789	T	G	T248P	0	0	1	1	0	0	0	2
rs184374817	17	43092887	A	C	C882G	1	0	1	1	0	0	0	3
rs183119644	17	43092021	A	C	I1170M	1	0	1	1	0	0	0	3
rs1268133978	17	43093845	A	C	I562M	1	0	0	1	0	1	0	3
rs879255482	17	43092483	A	C	N1016K	1	0	1	1	0	0	0	3
rs1064794483	17	43092835	A	C	V899G	1	0	1	1	0	0	0	3
rs80357166	17	43093568	A	C	Y655D	1	0	1	0	0	1	0	3
rs1388475291	17	43091578	A	G	I1318T	1	0	1	1	0	0	0	3
rs80356971	17	43092133	A	G	L1133S	1	0	1	1	0	0	0	3
rs397509332	17	43124089	A	G	L3S	1	0	0	1	0	0	1	3
rs273897656	17	43094212	A	G	L440S	1	0	1	1	0	0	0	3
rs80357020	17	43092490	A	G	M1014T	1	0	1	1	0	0	0	3
rs786203958	17	43092283	A	G	M1083T	1	0	1	1	0	0	0	3
rs1064793053	17	43104180	A	G	M128T	1	0	1	1	0	0	0	3
rs273900712	17	43091882	A	G	S1217P	1	0	1	0	0	1	0	3
rs773524529	17	43071145	A	G	V1611A	1	0	1	1	0	0	0	3
rs80356892	17	43092965	A	G	Y856H	1	0	1	1	0	0	0	3
rs1173044823	17	43094424	A	T	D369E	1	0	1	0	0	1	0	3
rs80357020	17	43092490	A	T	M1014K	1	0	1	1	0	0	0	3
rs80357203	17	43093134	A	T	N799K	1	0	0	1	1	0	0	3
rs80357036	17	43091696	C	A	A1279S	1	0	0	1	0	1	0	3
rs80356961	17	43094498	C	A	D345Y	1	0	1	0	1	0	0	3
rs397509275	17	43049145	C	A	E1815D	1	0	1	1	0	0	0	3
rs80356899	17	43092388	C	A	G1048V	1	0	1	1	0	0	0	3
rs730881490	17	43091536	C	A	G1332V	1	0	1	0	0	1	0	3
rs398122668	17	43092777	C	A	K918N	1	0	1	1	0	0	0	3
rs80357158	17	43071030	C	A	M1649I	1	0	1	1	0	0	0	3
rs748807039	17	43067693	C	A	M1684I	1	0	0	1	0	1	0	3
rs746067447	17	43094763	C	A	R256S	1	0	1	1	0	0	0	3
rs876660144	17	43093645	C	A	R629I	1	0	1	1	0	0	0	3
rs1800744	17	43074471	C	A	S1533I	1	0	1	0	1	0	0	3
rs749465132	17	43063371	C	A	V1740L	1	0	1	0	0	1	0	3
rs745418679	17	43092035	C	G	A1166P	1	0	1	1	0	0	0	3
rs1800726	17	43070993	C	G	A1662P	1	0	1	0	1	0	0	3
rs80357122	17	43093970	C	G	A521P	1	0	1	0	1	0	0	3
rs759108406	17	43093796	C	G	A579P	1	0	1	0	0	1	0	3
rs587781876	17	43071237	C	G	E1580D	1	0	0	1	0	1	0	3
rs774593602	17	43091018	C	G	G1371R	1	0	1	1	0	0	0	3
rs771837028	17	43094351	C	G	G394R	1	0	1	1	0	0	0	3
rs587781420	17	43093412	C	G	G707R	1	0	1	1	0	0	0	3
rs772226744	17	43106506	C	G	Q54H	1	0	0	1	0	1	0	3
rs1456509049	17	43091920	C	G	R1204T	1	0	1	1	0	0	0	3
rs80357470	17	43074486	C	G	R1528T	1	0	1	1	0	0	0	3
rs876660509	17	43070968	C	G	R1670T	1	0	1	1	0	0	0	3
rs746727823	17	43092697	C	G	S945T	1	0	0	1	0	1	0	3
rs56336919	17	43091990	C	G	V1181L	1	0	1	1	0	0	0	3
rs890599236	17	43071068	C	T	A1637T	1	0	1	1	0	0	0	3
rs1800726	17	43070993	C	T	A1662T	1	0	1	1	0	0	0	3
rs1333635543	17	43104897	C	T	C91Y	1	0	1	0	1	0	0	3
rs1064793302	17	43092065	C	T	D1156N	1	0	1	1	0	0	0	3
rs752300203	17	43090961	C	T	D1390N	1	0	1	1	0	0	0	3
rs4986850	17	43093454	C	T	D693N	1	0	1	1	0	0	0	3
rs80357114	17	43093286	C	T	D749N	1	0	1	1	0	0	0	3
rs80357461	17	43091627	C	T	E1302K	1	0	1	1	0	0	0	3
rs80357046	17	43094270	C	T	E421K	1	0	1	1	0	0	0	3
rs62625306	17	43093142	C	T	E797K	1	0	1	1	0	0	0	3
rs747364414	17	43082496	C	T	G1422E	1	0	1	0	0	0	1	3
rs752715574	17	43094597	C	T	G312S	1	0	1	1	0	0	0	3
rs757383244	17	43093030	C	T	G834E	1	0	1	0	1	0	0	3
rs587782432	17	43045789	C	T	M1848I	1	0	1	1	0	0	0	3
rs80357210	17	43091491	C	T	R1347K	1	0	0	1	0	1	0	3
rs4986849	17	43082433	C	T	R1443Q	1	0	1	1	0	0	0	3
rs878854948	17	43091959	C	T	S1191N	1	0	1	0	0	1	0	3
rs78951648	17	43090963	C	T	S1389N	1	0	0	0	0	1	1	3
rs80357398	17	43094401	C	T	S377N	1	0	0	1	0	1	0	3
rs80356983	17	43093636	C	T	S632N	1	0	0	1	0	1	0	3
rs1064793318	17	43099862	C	T	V154I	1	0	1	1	0	0	0	3
rs749702730	17	43071118	G	A	A1620V	1	0	1	1	0	0	0	3
rs56039126	17	43093666	G	A	A622V	1	0	1	0	0	1	0	3
rs1380919500	17	43094696	G	A	H279Y	1	0	1	0	0	1	0	3
rs1467535423	17	43067692	G	A	L1685F	1	0	1	1	0	0	0	3
rs1315262605	17	43124081	G	A	L6F	1	0	0	1	0	1	0	3
rs267604892	17	43071161	G	A	P1606S	1	0	1	1	0	0	0	3
rs1301795658	17	43094599	G	A	P311L	1	0	1	0	0	1	0	3
rs398122637	17	43094008	G	A	P508L	1	0	1	1	0	0	0	3
rs80356910	17	43093828	G	A	P568L	1	0	1	1	0	0	0	3
rs80357002	17	43071149	G	A	R1610C	1	0	1	1	0	0	0	3
rs398122645	17	43093687	G	A	S615F	1	0	1	0	0	1	0	3
rs786202070	17	43092466	G	A	T1022I	1	0	1	1	0	0	0	3
rs397509034	17	43092457	G	A	T1025I	1	0	1	1	0	0	0	3
rs397507226	17	43090948	G	A	T1394I	1	0	1	0	0	1	0	3
rs766784305	17	43067640	G	A	T1702I	1	0	1	0	0	1	0	3
rs1302055573	17	43093423	G	A	T703I	1	0	1	1	0	0	0	3
rs80357460	17	43092766	G	A	T922I	1	0	1	1	0	0	0	3
rs730881443	17	43092643	G	A	T963I	1	0	1	1	0	0	0	3
rs777132211	17	43094215	G	C	A439G	1	0	1	1	0	0	0	3
rs587782724	17	43104151	G	C	L138V	1	0	1	1	0	0	0	3
rs587778115	17	43099856	G	C	L156V	1	0	0	1	0	1	0	3
rs876659077	17	43092539	G	C	L998V	1	0	1	1	0	0	0	3
rs761925468	17	43071138	G	C	N1613K	1	0	1	1	0	0	0	3
rs1064794692	17	43094670	G	C	N287K	1	0	1	0	0	1	0	3
rs397509156	17	43104139	G	C	P142A	1	0	1	1	0	0	0	3
rs587776481	17	43093556	G	C	P659A	1	0	1	1	0	0	0	3
rs80356866	17	43091690	G	C	Q1281E	1	0	1	0	0	1	0	3
rs80356898	17	43093844	G	C	Q563E	1	0	1	0	0	1	0	3
rs41293455	17	43082434	G	C	R1443G	1	0	1	1	0	0	0	3
rs80357045	17	43099852	G	C	S157C	1	0	0	1	0	1	0	3
rs1060502336	17	43092664	G	C	S956C	1	0	1	1	0	0	0	3
rs1036328075	17	43070995	G	C	T1661R	1	0	1	1	0	0	0	3
rs80357326	17	43045717	G	T	D1872E	1	0	1	0	0	1	0	3
rs876659175	17	43093640	G	T	L631I	1	0	1	1	0	0	0	3
rs1468589409	17	43104220	G	T	P115T	1	0	0	1	0	1	0	3
rs111034213	17	43076501	G	T	P1512T	1	0	1	1	0	0	0	3
rs397509100	17	43091773	G	T	S1253Y	1	0	1	0	0	1	0	3
rs759366409	17	43094667	G	T	S288R	1	0	1	0	0	1	0	3
rs878854949	17	43091794	G	T	T1246N	1	0	1	1	0	0	0	3
rs1060502331	17	43106468	T	A	D67V	1	0	1	1	0	0	0	3
rs273899708	17	43092023	T	A	I1170F	1	0	1	1	0	0	0	3
rs1064793596	17	43067654	T	A	L1697F	1	0	1	1	0	0	0	3
rs876660410	17	43091562	T	A	Q1323H	1	0	0	1	0	1	0	3
rs864622260	17	43099857	T	A	Q155H	1	0	0	1	0	1	0	3
rs587782864	17	43092242	T	A	S1097C	1	0	0	1	0	1	0	3
rs786203753	17	43094231	T	A	S434C	1	0	1	1	0	0	0	3
rs766572561	17	43091872	T	C	D1220G	1	0	1	0	0	1	0	3
rs1165149350	17	43090960	T	C	D1390G	1	0	1	1	0	0	0	3
rs80356930	17	43071181	T	C	D1599G	1	0	1	1	0	0	0	3
rs28897684	17	43093006	T	C	E842G	1	0	1	1	0	0	0	3
rs1064794969	17	43092808	T	C	E908G	1	0	1	1	0	0	0	3
rs80356882	17	43082556	T	C	H1402R	1	0	0	1	0	1	0	3
rs1050289746	17	43093015	T	C	H839R	1	0	1	1	0	0	0	3
rs1426821558	17	43063359	T	C	I1744V	1	0	0	1	0	1	0	3
rs80357246	17	43094467	T	C	K355R	1	0	1	1	0	0	0	3
rs397508897	17	43106501	T	C	K56R	1	0	1	0	0	1	0	3
rs1060502357	17	43093483	T	C	K683R	1	0	1	1	0	0	0	3
rs56329598	17	43093316	T	C	K739E	1	0	1	1	0	0	0	3
rs756559408	17	43092622	T	C	K970R	1	0	1	1	0	0	0	3
rs80357196	17	43094642	T	C	M297V	1	0	1	1	0	0	0	3
rs786202665	17	43092527	T	C	N1002D	1	0	1	1	0	0	0	3
rs431825400	17	43091713	T	C	Q1273R	1	0	0	1	0	1	0	3
rs80357173	17	43093930	T	C	Q534R	1	0	0	1	0	1	0	3
rs397507203	17	43092817	T	C	Q905R	1	0	1	1	0	0	0	3
rs730881491	17	43091000	T	C	S1377G	1	0	1	1	0	0	0	3
rs56195342	17	43063368	T	C	T1741A	1	0	0	1	0	1	0	3
rs864622122	17	43092964	T	C	Y856C	1	0	1	0	1	0	0	3
rs587776482	17	43093189	T	G	E781A	1	0	1	1	0	0	0	3
rs80356882	17	43082556	T	G	H1402P	1	0	1	0	0	1	0	3
rs397509281	17	43047696	T	G	H1826P	1	0	1	0	1	0	0	3
rs4986847	17	43092758	T	G	I925L	1	0	1	1	0	0	0	3
rs397509053	17	43104234	T	G	K110T	1	0	1	1	0	0	0	3
rs397508829	17	43094468	T	G	K355Q	1	0	1	1	0	0	0	3
rs587783041	17	43093865	T	G	K556Q	1	0	1	1	0	0	0	3
rs80357355	17	43093571	T	G	K654Q	1	0	1	1	0	0	0	3
rs747046197	17	43093400	T	G	K711Q	1	0	1	1	0	0	0	3
rs786202937	17	43104247	T	G	N106H	1	0	1	1	0	0	0	3
rs80357057	17	43094113	T	G	N473T	1	0	1	0	0	1	0	3
rs786203965	17	43093612	T	G	Q640P	1	0	1	0	0	1	0	3
rs730881460	17	43092892	TC	T	E880T	1	0	1	1	0	0	0	3
rs397507191	17	43093841	T	A	N564Y	1	1	1	0	0	0	0	3
rs786204220	17	43093300	G	A	A744V	1	1	1	0	0	0	0	3
rs398122708	17	43094836	T	A	D232V	1	1	1	0	0	0	0	3
rs751104940	17	43093360	G	A	P724L	1	1	1	0	0	0	0	3
rs755920262	17	43071062	G	A	H1639Y	1	1	1	0	0	0	0	3
rs786202734	17	43071023	T	A	S1652C	1	1	1	0	0	0	0	3
rs899108857	17	43074409	C	A	D1554Y	1	1	1	0	0	0	0	3
rs756729124	17	43093362	A	T	N723K	1	1	1	0	0	0	0	3
rs4986850	17	43093454	C	A	D693Y	1	1	1	0	0	0	0	3
rs28897681	17	43093448	C	A	D695Y	1	1	1	0	0	0	0	3
rs80356863	17	43115726	T	G	K45T	1	1	1	0	0	0	0	3
rs769650474	17	43115727	T	G	K45Q	1	1	1	0	0	0	0	3
rs397507191	17	43093841	T	G	N564H	1	1	0	1	0	0	0	3
rs12946486	17	43091519	T	G	K1338Q	1	1	0	1	0	0	0	3
rs80357345	17	43091485	G	A	T1349M	1	1	0	1	0	0	0	3
rs397509321	17	43094741	T	A	S264C	1	1	0	1	0	0	0	3
rs80357137	17	43074472	T	A	S1533C	1	1	0	1	0	0	0	3
rs80357376	17	43094059	T	C	Q491R	1	1	0	1	0	0	0	3
rs765156052	17	43091440	T	G	N1364T	1	1	0	1	0	0	0	3
rs1060502323	17	43071163	G	A	A1605V	1	1	0	1	0	0	0	3
rs776999497	17	43094665	C	T	S289N	1	1	0	0	0	1	0	3
rs80357485	17	43092245	G	T	Q1096K	1	1	0	0	0	1	0	3
rs80357143	17	43091809	G	C	S1241C	1	1	0	1	0	0	0	3
rs80357136	17	43092128	G	C	Q1135E	1	1	0	0	0	1	0	3
rs80357160	17	43091734	C	A	S1266I	1	1	1	0	0	0	0	3
rs80357411	17	43071175	G	A	S1601F	1	1	1	0	0	0	0	3
rs397509100	17	43091773	G	C	S1253C	1	1	0	0	0	1	0	3
rs431825418	17	43095857	G	C	S220C	1	1	0	1	0	0	0	3
rs80357126	17	43076512	T	C	K1508R	1	1	0	1	0	0	0	3
rs879066235	17	43079373	T	A	N1462Y	0	0	1	1	1	0	0	3
rs80357381	17	43093128	A	C	C801W	0	0	1	1	1	0	0	3
rs56310439	17	43094814	A	C	H239Q	0	1	1	1	0	0	0	3
rs863224758	17	43092439	A	C	I1031S	0	0	1	1	1	0	0	3
rs398122643	17	43093732	A	C	I600S	0	0	1	1	1	0	0	3
rs587781492	17	43092781	A	C	I917S	0	0	1	1	1	0	0	3
rs748550848	17	43093378	A	C	L718R	0	0	1	1	1	0	0	3
rs774730386	17	43093159	A	C	L791R	0	0	1	1	1	0	0	3
rs876660682	17	43092637	A	C	L965R	0	0	1	1	1	0	0	3
rs876659514	17	43092535	A	C	L999R	0	0	1	1	1	0	0	3
rs140588714	17	43091727	A	C	N1268K	0	0	1	1	1	0	0	3
rs397507199	17	43093202	A	C	Y777D	0	0	1	1	1	0	0	3
rs757215735	17	43091780	A	G	C1251R	0	0	1	1	1	0	0	3
rs587782790	17	43094453	A	G	C360R	0	0	1	1	1	0	0	3
rs876660734	17	43094207	A	G	C442R	0	0	1	1	1	0	0	3
rs1064793591	17	43093130	A	G	C801R	0	0	1	1	1	0	0	3
rs397508966	17	43093118	A	G	C805R	0	0	1	1	1	0	0	3
rs144853230	17	43092551	A	G	C994R	0	0	1	1	1	0	0	3
rs1344422504	17	43092523	A	G	F1003S	0	0	1	1	1	0	0	3
rs28897695	17	43070929	A	G	F1683S	0	0	1	1	1	0	0	3
rs730881476	17	43093441	A	G	F697S	0	0	1	1	1	0	0	3
rs80356878	17	43092659	A	G	F958L	0	0	1	1	1	0	0	3
rs730881484	17	43093087	A	G	I815T	0	0	1	1	1	0	0	3
rs80357097	17	43104903	A	G	I89T	0	0	1	1	0	1	0	3
rs80357174	17	43104900	A	G	I90T	0	0	0	1	0	1	1	3
rs879254045	17	43092634	A	G	I966T	0	0	1	1	1	0	0	3
rs587782190	17	43091731	A	G	L1267S	0	0	1	1	1	0	0	3
rs377629427	17	43074390	A	G	L1560P	0	0	1	1	1	0	0	3
rs56119278	17	43071223	A	G	L1585P	0	0	1	1	1	0	0	3
rs1135401827	17	43093354	A	G	L726P	0	0	1	1	1	0	0	3
rs876659514	17	43092535	A	G	L999P	0	0	1	1	1	0	0	3
rs886040863	17	43071094	A	G	V1628A	0	0	1	1	0	1	0	3
rs1408104448	17	43070953	A	G	V1675A	0	0	1	1	0	1	0	3
rs753099787	17	43094719	A	G	V271A	0	0	1	1	0	1	0	3
rs1265352633	17	43074352	A	G	Y1573H	0	0	1	1	1	0	0	3
rs1382025345	17	43091858	A	T	C1225S	0	0	1	1	1	0	0	3
rs1064795603	17	43092701	A	T	C944S	0	0	1	1	1	0	0	3
rs80357387	17	43063941	A	T	F1716L	0	0	1	1	1	0	0	3
rs372366481	17	43093225	A	T	I769N	0	0	1	1	1	0	0	3
rs960381964	17	43094240	A	T	L431I	0	1	1	1	0	0	0	3
rs1213036734	17	43091816	A	T	S1239T	0	0	1	1	0	1	0	3
rs28897694	17	43070977	A	T	V1667D	0	0	1	1	1	0	0	3
rs876658606	17	43093600	C	A	C644F	0	0	1	1	1	0	0	3
rs80357328	17	43093058	C	A	D825Y	0	0	1	1	1	0	0	3
rs397509318	17	43094744	C	A	G263C	0	0	1	1	0	0	1	3
rs397509319	17	43094743	C	A	G263V	0	1	1	1	0	0	0	3
rs763051683	17	43094261	C	A	G424C	0	0	1	1	1	0	0	3
rs786202068	17	43091613	C	A	L1306F	0	1	1	1	0	0	0	3
rs398122678	17	43091634	C	A	Q1299H	0	0	1	1	0	1	0	3
rs145903082	17	43091781	C	G	E1250D	0	0	1	1	0	1	0	3
rs730881473	17	43093817	C	G	E572Q	0	1	0	1	0	1	0	3
rs374416358	17	43082561	C	G	M1400I	0	1	1	0	0	1	0	3
rs876658464	17	43092496	C	G	R1012T	0	1	1	1	0	0	0	3
rs70953661	17	43070980	C	G	R1666T	0	0	1	1	1	0	0	3
rs80357140	17	43094538	C	G	R331S	0	1	1	1	0	0	0	3
rs80357354	17	43082418	C	G	S1448T	0	0	1	1	0	1	0	3
rs144698700	17	43094306	C	G	V409L	0	0	1	1	0	1	0	3
rs80356935	17	43094472	C	G	W353C	0	0	1	1	1	0	0	3
rs80357252	17	43094567	C	T	A322T	0	0	1	1	0	1	0	3
rs80357240	17	43093112	C	T	A807T	0	0	1	1	0	1	0	3
rs1207787135	17	43091722	C	T	C1270Y	0	0	1	1	1	0	0	3
rs751124745	17	43094617	C	T	C305Y	0	0	1	1	1	0	0	3
rs1060502352	17	43093117	C	T	C805Y	0	0	1	1	1	0	0	3
rs770769275	17	43092700	C	T	C944Y	0	0	1	1	1	0	0	3
rs56056711	17	43094426	C	T	D369N	0	0	1	1	0	1	0	3
rs80357124	17	43092533	C	T	E1000K	0	0	1	1	0	1	0	3
rs876658360	17	43092257	C	T	E1092K	0	1	1	1	0	0	0	3
rs28897686	17	43091783	C	T	E1250K	0	0	1	1	0	1	0	3
rs141255461	17	43076588	C	T	E1483K	0	1	1	1	0	0	0	3
rs80357366	17	43074403	C	T	E1556K	0	1	1	1	0	0	0	3
rs776323117	17	43049147	C	T	E1815K	0	1	1	1	0	0	0	3
rs730881471	17	43093913	C	T	E540K	0	0	1	1	1	0	0	3
rs1288796003	17	43093172	C	T	E787K	0	1	1	1	0	0	0	3
rs786204151	17	43093106	C	T	E809K	0	0	1	1	1	0	0	3
rs757632961	17	43092313	C	T	G1073D	0	0	1	1	1	0	0	3
rs879251628	17	43092118	C	T	G1138E	0	0	1	1	1	0	0	3
rs531210457	17	43049125	C	T	G1822D	0	0	1	1	1	0	0	3
rs758598971	17	43093877	C	T	G552S	0	0	1	1	1	0	0	3
rs730881483	17	43093198	C	T	G778D	0	0	1	1	1	0	0	3
rs202004680	17	43092748	C	T	G928D	0	0	1	1	1	0	0	3
rs1324818767	17	43092686	C	T	G949S	0	0	1	1	1	0	0	3
rs397509022	17	43092652	C	T	G960D	0	0	1	1	1	0	0	3
rs1799967	17	43070958	C	T	M1673I	0	0	1	1	0	1	0	3
rs767421571	17	43082571	C	T	R1397K	0	0	1	1	0	1	0	3
rs199540030	17	43094134	C	T	R466Q	0	0	1	1	1	0	0	3
rs876659527	17	43093678	C	T	R618K	0	0	1	1	0	1	0	3
rs876660129	17	43082493	C	T	S1423N	0	0	1	1	0	1	0	3
rs1060502349	17	43093762	C	T	S590N	0	0	1	1	0	1	0	3
rs28897698	17	43047685	C	T	V1830I	0	0	1	1	0	1	0	3
rs80357425	17	43093652	C	T	V627I	0	0	1	1	0	1	0	3
rs80357315	17	43092970	G	A	A854V	0	0	1	1	0	1	0	3
rs1270749718	17	43094816	G	A	H239Y	0	1	1	1	0	0	0	3
rs80357250	17	43093529	G	A	L668F	0	0	1	1	0	1	0	3
rs755209182	17	43091962	G	A	P1190L	0	1	1	1	0	0	0	3
rs80356960	17	43076567	G	A	P1490S	0	1	1	1	0	0	0	3
rs1800757	17	43051069	G	A	P1797S	0	1	1	1	0	0	0	3
rs1198367014	17	43094225	G	A	P436S	0	0	1	1	0	1	0	3
rs1258526903	17	43093555	G	A	P659L	0	1	1	1	0	0	0	3
rs876660005	17	43093138	G	A	P798L	0	0	1	1	0	1	0	3
rs398122658	17	43093139	G	A	P798S	0	0	1	1	0	1	0	3
rs770583134	17	43092842	G	A	P897S	0	0	1	1	0	1	0	3
rs80357068	17	43094338	G	A	S398L	0	0	1	1	0	1	0	3
rs876660434	17	43093813	G	A	S573L	0	1	1	0	0	1	0	3
rs397507206	17	43092568	G	A	S988L	0	0	1	1	0	1	0	3
rs1323835354	17	43097268	G	A	T190I	0	0	1	1	0	1	0	3
rs397507212	17	43092322	G	C	A1070G	0	0	1	1	0	1	0	3
rs80357478	17	43092620	G	C	H971D	0	0	1	1	1	0	0	3
rs80357371	17	43093745	G	C	L596V	0	0	1	1	0	1	0	3
rs1259139517	17	43076582	G	C	P1485A	0	1	1	1	0	0	0	3
rs770583134	17	43092842	G	C	P897A	0	0	1	1	0	1	0	3
rs80356964	17	43094135	G	C	R466G	0	0	1	1	1	0	0	3
rs878854943	17	43092405	G	C	S1042R	0	0	1	1	0	1	0	3
rs200648498	17	43091733	G	C	S1266R	0	1	1	0	1	0	0	3
rs80357436	17	43094704	G	C	T276R	0	0	1	1	0	1	0	3
rs747172803	17	43094653	G	C	T293S	0	1	0	1	0	1	0	3
rs755920262	17	43071062	G	T	H1639N	0	1	1	1	0	0	0	3
rs786201893	17	43091715	G	T	N1272K	0	1	0	1	1	0	0	3
rs876660684	17	43082428	G	T	P1445T	0	1	1	1	0	0	0	3
rs768239314	17	43045779	G	T	P1852T	0	0	1	1	1	0	0	3
rs80357274	17	43045704	G	T	P1877T	0	0	1	1	1	0	0	3
rs80357067	17	43082422	G	T	Q1447K	0	1	1	0	0	1	0	3
rs28897676	17	43094045	G	T	R496S	0	0	1	1	1	0	0	3
rs80356994	17	43124078	G	T	R7S	0	0	1	1	1	0	0	3
rs777102216	17	43104140	T	A	E141D	0	0	1	1	0	1	0	3
rs56055578	17	43104174	T	A	Y130F	0	0	1	1	0	1	0	3
rs1282699332	17	43094542	T	C	D330G	0	0	1	1	0	1	0	3
rs730881479	17	43093285	T	C	D749G	0	0	1	1	1	0	0	3
rs1060502330	17	43092532	T	C	E1000G	0	0	1	1	0	1	0	3
rs786202288	17	43082442	T	C	E1440G	0	1	1	1	0	0	0	3
rs397507201	17	43093105	T	C	E809G	0	0	1	1	1	0	0	3
rs80357482	17	43094695	T	C	H279R	0	0	1	1	0	1	0	3
rs80357406	17	43124036	T	C	I21V	0	0	1	1	0	1	0	3
rs80357152	17	43091909	T	C	K1208E	0	0	1	1	0	1	0	3
rs80357141	17	43091833	T	C	K1233R	0	0	1	1	0	1	0	3
rs80357343	17	43091567	T	C	K1322E	0	1	1	1	0	0	0	3
rs778668550	17	43094182	T	C	K450R	0	0	1	1	0	1	0	3
rs879254266	17	43094017	T	C	K505R	0	1	1	0	0	1	0	3
rs730881475	17	43093492	T	C	K680R	0	0	1	1	0	1	0	3
rs879255477	17	43106526	T	C	M48V	0	0	1	1	0	1	0	3
rs587782630	17	43092404	T	C	N1043D	0	0	1	1	0	1	0	3
rs1264744701	17	43094615	T	C	N306D	0	0	1	1	0	1	0	3
rs80357236	17	43093705	T	C	N609S	0	1	0	1	0	1	0	3
rs765729710	17	43091593	T	C	Q1313R	0	1	0	1	0	1	0	3
rs730881444	17	43091551	T	C	Q1327R	0	1	1	1	0	0	0	3
rs876659193	17	43094392	T	C	Q380R	0	0	1	1	0	1	0	3
rs397508985	17	43092931	T	C	Q867R	0	0	1	1	0	1	0	3
rs80356926	17	43070981	T	C	R1666G	0	0	1	1	1	0	0	3
rs1312537519	17	43070969	T	C	R1670G	0	0	1	1	1	0	0	3
rs80357081	17	43095879	T	C	R213G	0	0	1	1	1	0	0	3
rs1064795091	17	43093265	T	C	R756G	0	0	1	1	1	0	0	3
rs758180755	17	43093064	T	C	R823G	0	0	1	1	1	0	0	3
rs1347533994	17	43092680	T	C	R951G	0	0	1	1	1	0	0	3
rs1401324575	17	43092656	T	C	R959G	0	0	1	1	1	0	0	3
rs753342801	17	43104253	T	C	S104G	0	0	1	1	0	1	0	3
rs398122671	17	43092380	T	C	T1051A	0	0	1	1	0	1	0	3
rs786201835	17	43076606	T	C	T1477A	0	1	0	1	0	1	0	3
rs876659959	17	43093403	T	C	T710A	0	0	1	1	0	1	0	3
rs80357435	17	43093004	T	C	T843A	0	0	1	1	0	1	0	3
rs1404795980	17	43104880	T	C	T97A	0	1	0	1	0	1	0	3
rs587778116	17	43093201	T	C	Y777C	0	0	1	1	1	0	0	3
rs863224756	17	43092598	T	C	Y978C	0	0	1	1	1	0	0	3
rs397507228	17	43104134	T	G	E143D	0	0	1	1	0	1	0	3
rs748431827	17	43093873	T	G	H553P	0	0	1	1	1	0	0	3
rs876660920	17	43093375	T	G	K719T	0	1	1	1	0	0	0	3
rs772975110	17	43093754	T	G	N593H	0	1	0	1	0	1	0	3
rs879254151	17	43092325	T	G	Q1069P	0	0	1	1	1	0	0	3
rs763740623	17	43045683	A	C	Y1884D	0	1	1	1	0	0	1	4
rs763740623	17	43045683	A	T	Y1884N	0	1	1	1	0	0	1	4
rs80357322	17	43045694	G	C	P1880R	0	1	1	1	1	0	0	4
rs765656957	17	43045698	T	A	I1879F	0	1	1	1	1	0	0	4
rs1245187485	17	43091658	A	C	C1291W	1	0	1	1	1	0	0	4
rs397509006	17	43104896	A	C	C91W	1	0	1	1	1	0	0	4
rs786201581	17	43091843	A	C	L1230V	1	0	1	1	0	1	0	4
rs748812609	17	43094071	A	C	V487G	1	0	1	1	1	0	0	4
rs1156932020	17	43091015	A	G	C1372R	1	0	1	1	0	1	0	4
rs786202015	17	43093397	A	G	C712R	1	0	1	1	1	0	0	4
rs80357316	17	43124053	A	G	I15T	1	0	1	1	0	1	0	4
rs80357314	17	43067691	A	G	L1685P	1	0	1	1	1	0	0	4
rs369394098	17	43094236	A	G	L432P	1	0	1	1	1	0	0	4
rs1167718207	17	43094119	A	G	L471P	1	0	1	1	1	0	0	4
rs80356897	17	43099853	A	G	S157P	1	0	1	0	0	1	1	4
rs1328261486	17	43094258	A	G	S425P	1	0	1	0	1	1	0	4
rs879253902	17	43093957	A	G	V525A	1	0	1	1	0	1	0	4
rs80356924	17	43094641	A	T	M297K	1	0	1	1	1	0	0	4
rs80356901	17	43092268	A	T	V1088D	1	0	1	1	1	0	0	4
rs80356920	17	43047699	A	T	V1825D	1	0	1	1	1	0	0	4
rs756987689	17	43094510	C	A	D341Y	1	0	1	1	1	0	0	4
rs80357114	17	43093286	C	A	D749Y	1	0	1	1	1	0	0	4
rs398122688	17	43074462	C	A	G1536V	1	0	1	1	1	0	0	4
rs397508893	17	43093876	C	A	G552V	1	0	1	1	1	0	0	4
rs786202534	17	43092521	C	G	E1004Q	1	0	1	1	0	1	0	4
rs876659510	17	43047703	C	G	G1824R	1	0	1	1	1	0	0	4
rs763051683	17	43094261	C	G	G424R	1	0	1	1	1	0	0	4
rs1293826790	17	43091712	C	G	Q1273H	1	0	1	1	0	1	0	4
rs80357373	17	43070979	C	G	R1666S	1	0	1	1	1	0	0	4
rs1328549834	17	43071208	C	G	S1590T	1	0	1	1	0	1	0	4
rs748894760	17	43092173	C	G	V1120L	1	0	1	1	0	1	0	4
rs80357293	17	43094774	C	T	A253T	1	0	1	1	0	1	0	4
rs587782882	17	43104205	C	T	D120N	1	0	1	1	0	1	0	4
rs80187739	17	43067608	C	T	D1713N	1	0	1	0	1	1	0	4
rs80357407	17	43091495	C	T	E1346K	1	0	1	1	0	1	0	4
rs398122703	17	43095909	C	T	E203K	1	0	1	1	1	0	0	4
rs730881486	17	43092685	C	T	G949D	1	0	1	1	1	0	0	4
rs879254027	17	43092641	C	T	G964R	1	0	1	1	1	0	0	4
rs587782019	17	43049178	C	T	M1804I	1	0	1	1	0	1	0	4
rs80357386	17	43092451	C	T	S1027N	1	0	1	1	0	1	0	4
rs1382449149	17	43091008	C	T	S1374N	1	0	1	0	0	1	1	4
rs80357169	17	43067689	C	T	V1686M	1	0	1	1	0	1	0	4
rs1304908704	17	43093898	C	T	V545M	1	0	1	1	0	1	0	4
rs762028824	17	43091023	G	A	A1369V	1	0	1	1	0	1	0	4
rs863224766	17	43094590	G	A	A314V	1	0	1	1	0	1	0	4
rs587778115	17	43099856	G	A	L156F	1	0	1	1	0	1	0	4
rs80356887	17	43092154	G	A	P1126L	1	0	1	1	1	0	0	4
rs28897688	17	43091818	G	A	P1238L	1	0	1	1	1	0	0	4
rs876658291	17	43094062	G	A	P490L	1	0	1	1	1	0	0	4
rs398122647	17	43093633	G	A	P633L	1	0	1	1	0	1	0	4
rs80357256	17	43092742	G	A	P930L	1	0	1	1	1	0	0	4
rs80356964	17	43094135	G	A	R466W	1	0	1	1	1	0	0	4
rs80357071	17	43090981	G	A	S1383L	1	0	1	1	0	1	0	4
rs730881502	17	43045715	G	A	T1873I	1	0	1	0	1	0	1	4
rs398122638	17	43093924	G	A	T536I	1	0	1	1	0	1	0	4
rs80357364	17	43093144	G	A	T796I	1	0	1	1	0	1	0	4
rs876659903	17	43091948	G	C	H1195D	1	0	1	1	1	0	0	4
rs80356963	17	43104902	G	C	I89M	1	0	1	1	0	1	0	4
rs80357329	17	43092124	G	C	P1136R	1	0	1	1	1	0	0	4
rs799917	17	43092919	G	C	P871R	1	0	1	1	0	1	0	4
rs866257451	17	43092908	G	C	P875A	1	0	1	1	0	1	0	4
rs878854957	17	43063365	G	C	Q1742E	1	0	1	0	0	1	1	4
rs62625308	17	43091924	G	C	R1203G	1	0	1	1	1	0	0	4
rs397509033	17	43092459	G	C	S1024R	1	0	1	1	0	1	0	4
rs80357434	17	43092103	G	C	S1143C	1	0	1	1	0	1	0	4
rs876660138	17	43099840	G	C	T161S	1	0	1	1	0	1	0	4
rs398122638	17	43093924	G	C	T536S	1	0	1	1	0	1	0	4
rs80357460	17	43092766	G	C	T922R	1	0	1	1	1	0	0	4
rs587778115	17	43099856	G	T	L156I	1	0	1	1	0	1	0	4
rs80357436	17	43094704	G	T	T276K	1	0	1	1	0	1	0	4
rs80357374	17	43093915	G	T	T539K	1	0	1	1	1	0	0	4
rs28897683	17	43093054	G	T	T826K	1	0	1	1	1	0	0	4
rs587781769	17	43094434	T	A	D366V	1	0	1	1	1	0	0	4
rs730881479	17	43093285	T	A	D749V	1	0	1	1	1	0	0	4
rs80357249	17	43093057	T	A	D825V	1	0	1	1	1	0	0	4
rs876660901	17	43092695	T	A	I946F	1	0	1	1	1	0	0	4
rs756559408	17	43092622	T	A	K970I	1	0	1	1	1	0	0	4
rs1468740591	17	43094168	T	A	N455Y	1	0	1	1	1	0	0	4
rs80357057	17	43094113	T	A	N473I	1	0	1	0	1	1	0	4
rs369925993	17	43092261	T	A	Q1090H	1	0	1	1	0	1	0	4
rs80357324	17	43051078	T	A	T1794S	1	0	1	1	0	1	0	4
rs879255296	17	43051066	T	A	T1798S	1	0	1	1	0	1	0	4
rs587781491	17	43104204	T	C	D120G	1	0	1	1	0	1	0	4
rs772684048	17	43094647	T	C	D295G	1	0	1	1	0	1	0	4
rs745954644	17	43092712	T	C	D940G	1	0	1	1	1	0	0	4
rs80357079	17	43082499	T	C	H1421R	1	0	1	1	0	1	0	4
rs776278453	17	43094578	T	C	H318R	1	0	1	1	0	1	0	4
rs587776489	17	43104190	T	C	I125V	1	0	1	1	0	1	0	4
rs747694453	17	43070972	T	C	K1669E	1	0	1	1	1	0	0	4
rs1057519495	17	43067682	T	C	K1688R	1	0	1	1	0	1	0	4
rs878854941	17	43092572	T	C	K987E	1	0	1	1	1	0	0	4
rs1348949389	17	43070960	T	C	M1673V	1	0	1	1	0	1	0	4
rs80357012	17	43049180	T	C	M1804V	1	0	1	1	0	1	0	4
rs1009044335	17	43104256	T	C	N103D	1	0	1	1	0	1	0	4
rs80357022	17	43076570	T	C	N1489D	1	0	1	1	0	1	0	4
rs773638815	17	43092100	T	C	Q1144R	1	0	1	1	0	1	0	4
rs876660866	17	43091635	T	C	Q1299R	1	0	1	1	0	1	0	4
rs80357039	17	43094680	T	C	Q284R	1	0	1	1	0	1	0	4
rs397508892	17	43093900	T	C	Q544R	1	0	1	1	0	1	0	4
rs80357263	17	43092311	T	C	R1074G	1	0	1	1	0	1	0	4
rs1432504119	17	43092278	T	C	R1085G	1	0	1	1	1	0	0	4
rs80357050	17	43094588	T	C	R315G	1	0	1	1	0	1	0	4
rs587781715	17	43094195	T	C	R446G	1	0	1	1	0	1	0	4
rs786203580	17	43091630	T	C	S1301G	1	0	1	1	0	1	0	4
rs80357486	17	43082419	T	C	S1448G	1	0	1	1	0	1	0	4
rs80357454	17	43093763	T	C	S590G	1	0	1	1	0	1	0	4
rs80357037	17	43091807	T	C	T1242A	1	0	1	1	0	1	0	4
rs878995408	17	43091597	T	C	T1312A	1	0	1	1	0	1	0	4
rs587782870	17	43090952	T	C	T1393A	1	0	1	1	0	1	0	4
rs80356890	17	43067629	T	C	T1706A	1	0	1	1	0	1	0	4
rs397509219	17	43067611	T	C	T1712A	1	0	1	1	0	1	0	4
rs41286298	17	43093163	T	C	T790A	1	0	1	1	0	1	0	4
rs1377019132	17	43092724	T	G	D936A	1	0	1	1	1	0	0	4
rs397508970	17	43093050	T	G	E827D	1	0	1	1	0	1	0	4
rs80357279	17	43094132	T	G	K467Q	1	0	1	1	0	1	0	4
rs80357012	17	43049180	T	G	M1804L	1	0	1	1	0	1	0	4
rs1064795862	17	43092911	T	G	N874H	1	0	1	1	0	1	0	4
rs397509242	17	43057088	T	G	Q1768H	1	0	1	1	0	1	0	4
rs876660057	17	43049173	T	G	Q1806P	1	0	1	1	1	0	0	4
rs397508892	17	43093900	T	G	Q544P	1	0	1	1	0	1	0	4
rs768054411	17	43094174	C	G	E453Q	1	1	1	1	0	0	0	4
rs80357312	17	43104231	T	G	E111A	1	1	1	1	0	0	0	4
rs894781955	17	43091739	C	G	K1264N	1	1	1	1	0	0	0	4
rs80357075	17	43076562	T	A	E1491D	1	1	1	1	0	0	0	4
rs41286288	17	43099868	G	A	L152F	1	1	1	1	0	0	0	4
rs786202386	17	43093786	G	A	T582M	1	1	1	1	0	0	0	4
rs1060502364	17	43091738	T	G	N1265H	1	1	1	1	0	0	0	4
rs1323998441	17	43093811	G	A	L574F	1	1	1	1	0	0	0	4
rs70953661	17	43070980	C	A	R1666M	1	1	1	1	0	0	0	4
rs80357194	17	43093232	T	C	S767G	1	1	1	1	0	0	0	4
rs80357439	17	43071103	T	C	Q1625R	1	1	1	1	0	0	0	4
rs398122694	17	43051110	C	A	R1783M	1	1	1	1	0	0	0	4
rs41293449	17	43092204	T	G	K1109N	1	1	1	1	0	0	0	4
rs397509194	17	43071171	T	G	E1602D	1	1	1	1	0	0	0	4
rs56012641	17	43093883	T	G	N550H	1	1	1	1	0	0	0	4
rs863224764	17	43057060	C	G	D1778H	1	1	1	1	0	0	0	4
rs273898682	17	43093245	T	A	R762S	1	1	1	1	0	0	0	4
rs879254020	17	43093822	G	T	P570Q	1	1	1	1	0	0	0	4
rs80356915	17	43094198	C	G	E445Q	1	1	1	1	0	0	0	4
rs397508934	17	43093481	G	T	P684T	1	1	1	1	0	0	0	4
rs864622618	17	43092690	T	A	K947N	1	1	1	1	0	0	0	4
rs786203547	17	43063349	C	A	R1747I	1	1	1	1	0	0	0	4
rs753748171	17	43094321	C	G	E404Q	1	1	1	1	0	0	0	4
rs28897680	17	43093471	T	G	Q687P	1	1	1	1	0	0	0	4
rs876659007	17	43071187	T	C	E1597G	1	1	1	1	0	0	0	4
rs41286290	17	43094530	G	T	P334H	1	1	1	1	0	0	0	4
rs759655692	17	43093414	G	A	P706L	1	1	1	1	0	0	0	4
rs80356899	17	43092388	C	T	G1048D	1	1	1	1	0	0	0	4
rs431825401	17	43091662	T	G	K1290T	1	1	1	1	0	0	0	4
rs191872612	17	43094848	A	T	F228Y	1	1	1	1	0	0	0	4
rs1060502341	17	43093810	A	G	L574P	1	1	1	1	0	0	0	4
rs80357154	17	43092485	T	C	N1016D	1	1	1	1	0	0	0	4
rs876659269	17	43092026	C	A	D1169Y	1	1	1	1	0	0	0	4
rs80357201	17	43092235	G	A	P1099L	1	1	1	1	0	0	0	4
rs1064795270	17	43093774	G	C	P586R	1	1	1	1	0	0	0	4
rs778487856	17	43070965	A	G	M1671T	1	1	1	1	0	0	0	4
rs757933953	17	43093190	C	T	E781K	1	1	1	1	0	0	0	4
rs876659028	17	43093869	C	G	E554D	1	1	1	1	0	0	0	4
rs16941	17	43092418	T	G	E1038A	1	1	1	1	0	0	0	4
rs56214134	17	43091931	C	A	Q1200H	1	1	1	1	0	0	0	4
rs1173155015	17	43071026	C	T	E1651K	1	1	1	1	0	0	0	4
rs80357456	17	43091456	G	T	Q1359K	1	1	1	0	0	1	0	4
rs564757581	17	43071235	C	A	G1581V	1	1	1	0	1	0	0	4
rs397509216	17	43067685	T	C	Y1687C	1	1	1	0	1	0	0	4
rs273901741	17	43071184	G	T	S1598Y	1	1	1	0	0	1	0	4
rs876660448	17	43093814	A	G	S573P	1	1	1	0	0	1	0	4
rs62625304	17	43094023	T	C	K503R	1	1	1	0	0	1	0	4
rs80357013	17	43082500	G	A	H1421Y	1	1	1	0	0	1	0	4
rs1184976447	17	43092240	A	C	S1097R	1	1	1	0	0	1	0	4
rs1259369962	17	43099790	C	G	V178L	1	1	1	0	0	1	0	4
rs587776482	17	43093189	T	A	E781V	1	1	1	0	1	0	0	4
rs397509075	17	43092040	C	A	S1164I	1	1	1	0	0	1	0	4
rs786203732	17	43094546	T	A	N329Y	1	1	1	0	0	1	0	4
rs80356945	17	43093193	G	C	Q780E	1	1	1	0	0	1	0	4
rs80357484	17	43092068	C	G	D1155H	1	1	1	0	0	1	0	4
rs587782873	17	43047697	G	A	H1826Y	1	1	1	0	1	0	0	4
rs80357001	17	43094839	G	A	T231M	1	1	1	0	0	1	0	4
rs1356078500	17	43093993	T	G	H513P	1	1	1	0	1	0	0	4
rs1038244014	17	43094628	C	A	K301N	1	1	1	0	0	1	0	4
rs561998108	17	43094608	C	G	S308T	1	1	1	0	0	1	0	4
rs1489545368	17	43067643	A	G	I1701T	1	1	1	0	0	1	0	4
rs80357370	17	43106529	A	T	C47S	1	1	1	0	0	1	0	4
rs397508898	17	43106500	T	A	K56N	1	1	1	0	0	1	0	4
rs142383077	17	43091674	C	G	S1286T	1	1	1	0	0	1	0	4
rs769712441	17	43092865	G	T	S889Y	1	1	1	0	0	1	0	4
rs80357043	17	43067628	G	A	T1706I	1	1	1	0	0	1	0	4
rs876660112	17	43093243	G	C	S763C	1	1	0	1	0	1	0	4
rs876658465	17	43082565	G	C	T1399S	1	1	0	1	0	1	0	4
rs80356968	17	43070959	A	G	M1673T	1	1	0	1	0	1	0	4
rs587782747	17	43099795	G	A	T176M	1	1	0	1	0	1	0	4
rs80357091	17	43104910	A	C	L87V	1	1	0	1	0	1	0	4
rs56158747	17	43071232	G	T	T1582N	1	1	0	1	0	1	0	4
rs756499058	17	43104914	C	A	E85D	1	1	0	1	0	1	0	4
rs80356988	17	43074331	C	G	E1580Q	1	1	0	1	0	1	0	4
rs80357340	17	43057112	A	C	D1760E	1	1	1	0	0	1	0	4
rs1403004357	17	43095905	A	C	L204W	1	1	1	1	0	0	0	4
rs397508885	17	43093963	A	C	L523W	1	1	1	1	0	0	0	4
rs80357275	17	43099867	A	G	L152P	1	1	1	1	0	0	0	4
rs730881481	17	43093219	A	G	L771S	1	1	1	1	0	0	0	4
rs80357327	17	43115730	A	T	C44S	1	1	1	0	0	1	0	4
rs777305766	17	43094356	A	T	L392Q	1	1	1	1	0	0	0	4
rs273900719	17	43091628	A	T	S1301R	1	1	1	0	0	1	0	4
rs1064795269	17	43097287	A	T	S184T	1	1	1	0	0	1	0	4
rs80356906	17	43074337	C	A	D1578Y	1	1	1	0	0	1	0	4
rs147519994	17	43094798	C	A	D245Y	1	1	1	0	0	1	0	4
rs1800707	17	43082543	C	A	K1406N	1	1	1	0	0	1	0	4
rs919114934	17	43094022	C	A	K503N	1	1	1	0	0	1	0	4
rs760109939	17	43093689	C	A	K614N	1	1	1	0	0	1	0	4
rs80357334	17	43092177	C	A	Q1118H	1	1	1	1	0	0	0	4
rs80357247	17	43092094	C	G	C1146S	1	1	1	1	0	0	0	4
rs80357310	17	43091870	C	G	E1221Q	1	1	0	0	0	1	1	4
rs1057519558	17	43082518	C	G	E1415Q	1	1	0	0	0	1	1	4
rs773433679	17	43094555	C	G	E326Q	1	1	1	1	0	0	0	4
rs876658341	17	43091811	C	G	Q1240H	1	1	0	1	0	1	0	4
rs786201618	17	43082534	C	G	Q1409H	1	1	0	1	0	1	0	4
rs755370895	17	43071191	G	A	P1596S	1	1	1	1	0	0	0	4
rs80357429	17	43071127	G	A	S1617L	1	1	1	0	0	1	0	4
rs769712441	17	43092865	G	A	S889F	1	1	1	0	0	1	0	4
rs80357034	17	43067610	G	A	T1712I	1	1	1	0	0	1	0	4
rs1006895761	17	43082521	G	C	L1414V	1	1	0	1	0	1	0	4
rs879254009	17	43092281	G	T	L1084I	1	1	1	1	0	0	0	4
rs1397842308	17	43094090	G	T	L481I	1	1	1	1	0	0	0	4
rs80357500	17	43091587	G	T	P1315H	1	1	0	1	1	0	0	4
rs55971303	17	43104138	G	T	P142H	1	1	1	1	0	0	0	4
rs80357052	17	43071190	G	T	P1596H	1	1	1	1	0	0	0	4
rs80357048	17	43071004	G	T	P1658Q	1	1	0	1	0	1	0	4
rs876658340	17	43091656	G	T	S1292Y	1	1	1	0	0	1	0	4
rs386833394	17	43091569	G	T	S1321Y	1	1	1	0	0	1	0	4
rs80356871	17	43090998	G	T	S1377R	1	1	1	1	0	0	0	4
rs55688530	17	43097280	G	T	S186Y	1	1	1	0	0	1	0	4
rs80356939	17	43093798	G	T	S578Y	1	1	1	0	0	1	0	4
rs80357129	17	43093597	G	T	S645Y	1	1	1	0	0	1	0	4
rs80357062	17	43094788	G	T	T248N	1	1	1	1	0	0	0	4
rs757726297	17	43076527	T	A	D1503V	1	1	1	1	0	0	0	4
rs762744684	17	43092130	T	A	E1134V	1	1	1	0	0	1	0	4
rs80357217	17	43091686	T	A	E1282V	1	1	1	0	0	1	0	4
rs879254228	17	43091476	T	A	E1352V	1	1	0	0	0	1	1	4
rs730881488	17	43091850	T	A	Q1227H	1	1	0	1	0	1	0	4
rs1018305119	17	43082535	T	A	Q1409L	1	1	1	0	0	1	0	4
rs1799966	17	43071077	T	A	S1634C	1	1	1	0	0	1	0	4
rs1064794047	17	43094108	T	A	S475C	1	1	0	1	0	1	0	4
rs80357194	17	43093232	T	A	S767C	1	1	1	1	0	0	0	4
rs80357042	17	43091566	T	C	K1322R	1	1	1	1	0	0	0	4
rs878854962	17	43097260	T	C	K193E	1	1	1	1	0	0	0	4
rs80356976	17	43094404	T	C	N376S	1	1	0	1	0	1	0	4
rs80357042	17	43091566	T	G	K1322T	1	1	1	1	0	0	0	4
rs1420901970	17	43097259	T	G	K193T	1	1	1	1	0	0	0	4
rs786202263	17	43094753	T	G	K260Q	1	1	0	1	0	1	0	4
rs397508882	17	43093976	T	G	K519Q	1	1	1	0	0	1	0	4
rs28897695	17	43070929	A	C	F1683C	0	1	1	1	1	0	0	4
rs794727800	17	43104124	A	C	L147V	0	1	1	1	0	1	0	4
rs730881474	17	43093609	A	G	I641T	0	1	1	1	0	1	0	4
rs80357006	17	43092274	A	G	L1086S	0	1	1	1	1	0	0	4
rs760038328	17	43067646	A	G	L1700P	0	1	1	1	1	0	0	4
rs1407786310	17	43094593	A	G	L313S	0	1	1	1	1	0	0	4
rs876659601	17	43092365	A	G	S1056P	0	1	1	1	0	1	0	4
rs1016051167	17	43099843	C	A	G160V	0	1	1	0	1	1	0	4
rs397507188	17	43093999	C	A	G511V	0	1	1	1	1	0	0	4
rs28897699	17	43045699	C	A	Q1878H	0	1	0	1	1	1	0	4
rs886041144	17	43091522	C	G	D1337H	0	1	1	1	0	1	0	4
rs879255484	17	43091967	C	G	R1188S	0	1	1	1	0	1	0	4
rs1064793833	17	43074521	C	G	R1516S	0	1	1	1	0	1	0	4
rs763354142	17	43091831	C	G	V1234L	0	1	1	1	0	1	0	4
rs55816927	17	43099838	C	G	V162L	0	1	1	1	0	1	0	4
rs753256448	17	43092923	C	T	A870T	0	1	1	1	0	1	0	4
rs1376262238	17	43094854	C	T	C226Y	0	1	1	1	1	0	0	4
rs876660331	17	43082569	C	T	D1398N	0	1	0	1	0	1	1	4
rs80356988	17	43074331	C	T	E1580K	0	1	1	1	0	1	0	4
rs80357251	17	43092896	C	T	E879K	0	1	1	1	0	1	0	4
rs80356955	17	43092647	C	T	E962K	0	0	1	1	1	1	0	4
rs80357304	17	43094081	C	T	G484R	0	1	1	1	1	0	0	4
rs56272539	17	43094020	C	T	R504H	0	0	1	1	1	1	0	4
rs876660322	17	43093702	C	T	R610K	0	1	1	1	0	1	0	4
rs763354142	17	43091831	C	T	V1234I	0	1	1	1	0	1	0	4
rs80357244	17	43094720	C	T	V271M	0	1	1	1	0	1	0	4
rs587781477	17	43067668	G	A	H1693Y	0	0	1	1	1	1	0	4
rs769380445	17	43093946	G	A	P529S	0	1	1	1	0	1	0	4
rs397508904	17	43106496	G	A	P58S	0	1	1	1	0	1	0	4
rs80356902	17	43093634	G	A	P633S	0	1	1	1	0	1	0	4
rs80357056	17	43093631	G	A	P634S	0	1	1	1	0	1	0	4
rs80357049	17	43092449	G	A	R1028C	0	1	0	1	1	0	1	4
rs1260879887	17	43094257	G	A	S425F	0	1	1	0	1	1	0	4
rs199522616	17	43106492	G	A	S59L	0	1	1	1	0	1	0	4
rs80357063	17	43093222	G	A	S770L	0	1	1	1	0	1	0	4
rs1412871417	17	43124047	G	C	A17G	0	1	1	1	0	1	0	4
rs768945711	17	43071201	G	C	F1592L	0	1	1	1	0	1	0	4
rs778607600	17	43092306	G	C	N1075K	0	0	1	1	1	1	0	4
rs397509039	17	43092379	G	C	T1051S	0	1	1	1	0	1	0	4
rs397508904	17	43106496	G	T	P58T	0	1	1	1	0	1	0	4
rs1015073230	17	43070941	G	T	T1679N	0	1	1	1	0	1	0	4
rs1262148583	17	43093473	T	A	E686D	0	1	1	1	0	1	0	4
rs786203979	17	43092440	T	A	I1031F	0	1	1	1	1	0	0	4
rs730881499	17	43045793	T	A	Q1847L	0	1	1	0	1	1	0	4
rs80357041	17	43049194	T	C	D1799G	0	0	1	1	1	1	0	4
rs80357416	17	43094425	T	C	D369G	0	0	1	1	1	1	0	4
rs786204049	17	43093606	T	C	D642G	0	1	1	1	0	1	0	4
rs397508881	17	43093987	T	C	E515G	0	1	1	1	0	1	0	4
rs876660455	17	43093747	T	C	E595G	0	1	1	1	0	1	0	4
rs80357085	17	43093237	T	C	E765G	0	1	1	1	0	1	0	4
rs756859863	17	43094630	T	C	K301E	0	1	1	1	0	1	0	4
rs879255498	17	43094606	T	C	K309E	0	1	1	1	0	1	0	4
rs774959350	17	43093951	T	C	K527R	0	1	1	1	0	1	0	4
rs587781448	17	43093463	T	C	K690E	0	1	1	1	0	1	0	4
rs768995134	17	43092377	T	C	N1052D	0	1	1	1	0	1	0	4
rs398122672	17	43092376	T	C	N1052S	0	1	1	1	0	1	0	4
rs749593365	17	43094638	T	C	N298S	0	1	1	1	0	1	0	4
rs1174268388	17	43093735	T	C	N599S	0	1	1	1	0	1	0	4
rs28897689	17	43091492	T	C	R1347G	0	1	1	1	0	1	0	4
rs80357245	17	43093697	T	C	R612G	0	1	1	1	0	1	0	4
rs397509257	17	43051089	T	C	Y1790C	0	0	1	1	1	1	0	4
rs80357483	17	43091689	T	G	Q1281P	0	0	1	1	1	1	0	4
rs1060502366	17	43095911	T	G	Q202P	0	1	1	1	1	0	0	4
rs1060502342	17	43045788	A	C	C1849G	1	0	1	1	1	0	1	5
rs1064794701	17	43093065	A	C	N822K	1	0	1	1	1	1	0	5
rs753099787	17	43094719	A	C	V271G	1	0	1	1	1	1	0	5
rs770002293	17	43093651	A	C	V627G	1	0	1	1	1	1	0	5
rs748156170	17	43094549	A	G	C328R	1	0	1	1	1	1	0	5
rs587781472	17	43067680	A	G	F1689L	1	0	1	1	1	1	0	5
rs80357205	17	43067694	A	T	M1684K	1	0	1	1	1	1	0	5
rs587778117	17	43092254	C	A	V1093F	1	0	1	1	1	1	0	5
rs80357252	17	43094567	C	G	A322P	1	0	1	1	1	1	0	5
rs80357112	17	43051063	C	T	D1799N	1	0	1	1	1	1	0	5
rs41293445	17	43092320	C	T	E1071K	1	0	1	1	1	1	0	5
rs80356958	17	43067638	C	T	E1703K	1	0	1	1	1	1	0	5
rs786203523	17	43092995	C	T	E846K	1	0	1	1	0	1	1	5
rs876659510	17	43047703	C	T	G1824S	1	0	1	1	1	0	1	5
rs1060502328	17	43049177	C	T	V1805I	1	0	1	1	0	1	1	5
rs80357325	17	43099814	G	A	R170W	1	0	1	1	1	1	0	5
rs80357445	17	43094021	G	A	R504C	1	0	1	1	1	1	0	5
rs398122696	17	43051065	G	A	T1798I	1	0	1	1	0	1	1	5
rs587782747	17	43099795	G	C	T176R	1	0	1	1	1	1	0	5
rs80357413	17	43104167	G	T	N132K	1	0	1	1	1	1	0	5
rs80356873	17	43045734	G	T	Q1867K	1	0	1	0	1	1	1	5
rs80357270	17	43057131	T	C	D1754G	1	0	1	1	1	1	0	5
rs80357477	17	43047657	T	C	D1839G	1	0	1	1	1	1	0	5
rs886039313	17	43091515	T	C	E1339G	1	0	1	1	0	1	1	5
rs774679104	17	43091834	T	C	K1233E	1	0	1	1	0	1	1	5
rs80356894	17	43091879	T	C	S1218G	1	0	1	1	0	1	1	5
rs750645074	17	43093039	T	C	Y831C	1	1	1	1	1	0	0	5
rs775339017	17	43091503	T	A	D1343V	1	1	1	1	1	0	0	5
rs1426681028	17	43094620	A	G	F304S	1	1	1	1	1	0	0	5
rs369588942	17	43094072	C	A	V487F	1	1	1	1	1	0	0	5
rs786203428	17	43092138	AT	A	D1131V	1	1	1	1	1	0	0	5
rs876659731	17	43093063	C	A	R823I	1	1	1	1	1	0	0	5
rs876659025	17	43092589	G	A	P981L	1	1	1	1	1	0	0	5
rs786204220	17	43093300	G	T	A744D	1	1	1	1	1	0	0	5
rs780869838	17	43092022	A	T	I1170N	1	1	1	1	1	0	0	5
rs1040084590	17	43092613	A	G	L973P	1	1	1	1	1	0	0	5
rs28897682	17	43093103	T	A	N810Y	1	1	1	1	1	0	0	5
rs80357495	17	43093647	A	C	S628R	1	1	1	1	1	0	0	5
rs757987511	17	43094491	A	T	L347Q	1	1	1	1	1	0	0	5
rs80356878	17	43092659	A	T	F958I	1	1	1	1	1	0	0	5
rs80357488	17	43094273	C	A	D420Y	1	1	1	1	1	0	0	5
rs80357500	17	43091587	G	C	P1315R	1	1	1	1	1	0	0	5
rs772617029	17	43093262	C	A	V757F	1	1	1	1	1	0	0	5
rs398122694	17	43051110	C	G	R1783T	1	1	1	1	1	0	0	5
rs1060502365	17	43093081	C	A	G817V	1	1	1	1	1	0	0	5
rs80357328	17	43093058	C	G	D825H	1	1	1	1	1	0	0	5
rs80357188	17	43092845	T	A	S896C	1	1	1	1	0	1	0	5
rs876658285	17	43094035	G	A	T499I	1	1	1	1	0	1	0	5
rs587782012	17	43071134	G	C	P1615A	1	1	1	1	0	1	0	5
rs1471435242	17	43045740	G	T	L1865I	1	1	1	1	0	1	0	5
rs55874646	17	43094585	T	C	S316G	1	1	1	1	0	1	0	5
rs80357022	17	43076570	T	G	N1489H	1	1	1	1	0	1	0	5
rs431825419	17	43095846	C	T	A224T	1	1	1	1	0	1	0	5
rs863224754	17	43092977	G	C	L852V	1	1	1	1	0	1	0	5
rs80357257	17	43091602	G	A	T1310I	1	1	1	1	0	0	1	5
rs1295353818	17	43091851	T	C	Q1227R	1	1	1	1	0	1	0	5
rs80356987	17	43071071	C	T	A1636T	1	1	1	1	0	1	0	5
rs80357479	17	43092362	T	C	S1057G	1	1	1	1	0	1	0	5
rs80357129	17	43093597	G	C	S645C	1	1	1	1	0	1	0	5
rs750275408	17	43104237	T	C	K109R	1	1	1	1	0	1	0	5
rs431825396	17	43092098	C	A	V1145F	1	1	1	1	0	0	1	5
rs80357371	17	43093745	G	A	L596F	1	1	1	1	0	1	0	5
rs273899704	17	43092244	T	C	Q1096R	1	1	1	1	0	1	0	5
rs786202213	17	43104147	T	C	Q139R	1	1	1	1	0	1	0	5
rs869320779	17	43074336	T	C	D1578G	1	1	1	1	0	1	0	5
rs397508904	17	43106496	G	C	P58A	1	1	1	1	0	1	0	5
rs587781770	17	43051074	T	C	N1795S	1	1	1	1	0	1	0	5
rs80356922	17	43092099	C	A	Q1144H	1	1	1	1	0	1	0	5
rs757579891	17	43092460	C	G	S1024T	1	1	1	1	0	1	0	5
rs879254150	17	43063354	T	G	K1745N	1	1	1	1	0	1	0	5
rs755614810	17	43082454	G	A	S1436F	1	1	1	1	0	1	0	5
rs80356927	17	43092947	T	C	K862E	1	1	1	1	0	1	0	5
rs1169162396	17	43093769	T	C	S588G	1	1	1	1	0	1	0	5
rs80357451	17	43047681	A	G	V1831A	1	1	1	1	0	1	0	5
rs397508903	17	43093802	C	G	E577Q	1	1	1	1	0	1	0	5
rs1427847949	17	43092355	T	C	N1059S	1	1	1	1	0	1	0	5
rs80357190	17	43104258	G	C	A102G	1	1	1	1	0	1	0	5
rs587782188	17	43091996	T	G	K1179Q	1	1	1	1	0	1	0	5
rs80357389	17	43076488	C	T	R1516K	1	1	1	1	0	1	0	5
rs864622104	17	43057104	T	C	N1763S	1	1	1	1	0	1	0	5
rs749290001	17	43045775	A	G	V1853A	1	1	1	1	0	1	0	5
rs397507211	17	43092346	C	A	G1062V	1	1	1	1	0	0	1	5
rs587782843	17	43093611	T	A	Q640H	1	1	1	1	0	1	0	5
rs748410422	17	43092531	C	A	E1000D	1	1	1	1	0	1	0	5
rs373207084	17	43092953	T	C	T860A	1	1	1	1	0	1	0	5
rs80357074	17	43057075	C	T	A1773T	1	1	1	1	0	1	0	5
rs587782026	17	43045800	T	C	I1845V	1	1	1	1	0	1	0	5
rs876659467	17	43091546	C	T	E1329K	1	1	1	1	0	0	1	5
rs397507227	17	43082542	G	C	L1407V	1	1	1	1	0	1	0	5
rs397507189	17	43106507	T	C	Q54R	1	1	1	1	0	1	0	5
rs80357393	17	43045782	C	T	A1851T	1	1	1	1	0	1	0	5
rs1348270931	17	43093196	T	G	T779P	1	1	1	1	0	1	0	5
rs80357216	17	43047684	A	G	V1830A	1	1	1	1	0	1	0	5
rs80357313	17	43092304	C	A	R1076I	1	1	1	1	0	1	0	5
rs1064793883	17	43094030	T	C	K501E	1	1	1	1	0	1	0	5
rs80357358	17	43047687	A	G	V1829A	1	1	1	1	0	1	0	5
rs587783040	17	43106524	C	T	M48I	1	1	1	1	0	1	0	5
rs878854946	17	43104235	T	C	K110E	1	1	1	1	0	0	1	5
rs80357220	17	43093712	T	C	K607E	1	1	1	1	0	1	0	5
rs80357105	17	43093604	T	C	S643G	1	1	1	1	0	1	0	5
rs1369043501	17	43099834	C	G	R163T	1	1	1	1	0	1	0	5
rs273900711	17	43091906	A	C	L1209V	1	1	1	1	0	1	0	5
rs754014157	17	43091957	G	A	P1192S	1	1	1	1	0	1	0	5
rs398122655	17	43093235	T	C	S766G	1	1	1	1	0	1	0	5
rs397507239	17	43067614	T	G	K1711Q	1	1	1	1	0	1	0	5
rs56039126	17	43093666	G	C	A622G	1	1	1	1	0	1	0	5
rs1135401885	17	43051070	C	T	M1796I	1	1	1	1	0	1	0	5
rs876660263	17	43067652	G	A	T1698I	1	1	1	1	0	1	0	5
rs1060502347	17	43091902	T	C	E1210G	1	1	1	1	0	1	0	5
rs56158747	17	43071232	G	A	T1582I	1	1	1	1	0	1	0	5
rs55767801	17	43094609	T	C	S308G	1	1	1	1	0	1	0	5
rs1799950	17	43094464	T	C	Q356R	1	1	1	1	0	1	0	5
rs80357087	17	43067677	C	A	A1690S	1	1	1	1	0	1	0	5
rs398122675	17	43091889	C	A	E1214D	1	1	1	1	0	1	0	5
rs1060502361	17	43093602	A	C	S643R	1	1	1	1	0	1	0	5
rs80357240	17	43093112	C	A	A807S	1	1	1	1	0	1	0	5
rs80357272	17	43092083	G	A	P1150S	1	1	1	1	0	1	0	5
rs864622723	17	43094396	T	C	I379V	1	1	1	1	0	1	0	5
rs80357087	17	43067677	C	T	A1690T	1	1	1	1	0	1	0	5
rs80357467	17	43093216	A	G	V772A	1	1	1	1	0	1	0	5
rs80357244	17	43094720	C	A	V271L	1	1	1	1	0	1	0	5
rs145758886	17	43049156	C	A	V1812L	1	1	1	1	0	1	0	5
rs876659314	17	43067641	T	G	T1702P	1	1	1	1	0	1	0	5
rs786203434	17	43094400	G	C	S377R	1	1	1	0	1	1	0	5
rs876659528	17	43104219	G	A	P115L	1	1	1	0	0	1	1	5
rs745638837	17	43091497	T	A	E1345V	1	1	1	0	1	0	1	5
rs80357079	17	43082499	T	A	H1421L	1	1	1	0	0	1	1	5
rs786203027	17	43094686	G	A	S282L	1	1	1	0	0	1	1	5
rs80357265	17	43067637	T	A	E1703V	1	1	1	0	1	1	0	5
rs886040862	17	43104927	T	A	Q81L	1	1	1	0	1	1	0	5
rs56187033	17	43099786	T	C	Y179C	1	1	1	0	1	1	0	5
rs730881500	17	43045769	G	A	T1855I	1	1	1	0	0	1	1	5
rs397509192	17	43099850	T	A	N158Y	1	1	1	0	0	1	1	5
rs876660335	17	43093603	C	A	S643I	1	1	1	0	0	1	1	5
rs80357034	17	43067610	G	T	T1712K	1	1	1	0	0	1	1	5
rs1057518640	17	43067676	G	A	A1690V	1	1	1	0	1	1	0	5
rs397509222	17	43063951	T	A	D1713V	1	1	1	0	1	1	0	5
rs80357446	17	43115729	C	T	C44Y	1	1	1	0	1	1	0	5
rs976725810	17	43091525	T	A	S1336C	1	1	0	1	0	1	1	5
rs755285181	17	43094711	A	C	C274G	1	1	1	1	0	1	0	5
rs56128296	17	43094394	A	C	I379M	1	1	1	1	0	1	0	5
rs1209004897	17	43094660	A	C	L291V	1	1	1	1	0	1	0	5
rs80357111	17	43124095	A	C	M1R	1	1	1	1	0	1	0	5
rs945168715	17	43104182	A	C	S127R	1	1	1	0	1	1	0	5
rs730881493	17	43071218	A	C	S1587A	1	1	1	1	0	1	0	5
rs80357399	17	43093181	A	C	S784A	1	1	1	1	0	1	0	5
rs80357370	17	43106529	A	G	C47R	1	1	1	0	0	1	1	5
rs41293451	17	43091840	A	G	F1231L	1	1	1	1	0	1	0	5
rs273901740	17	43071202	A	G	F1592S	1	1	1	1	0	1	0	5
rs62625300	17	43094150	A	G	F461L	1	1	1	1	0	1	0	5
rs397509132	17	43091479	A	G	L1351S	1	1	1	1	0	1	0	5
rs80357061	17	43067616	A	G	M1710T	1	1	1	1	0	1	0	5
rs80357111	17	43124095	A	G	M1T	1	1	1	1	0	1	0	5
rs397509062	17	43104223	A	G	S114P	1	1	1	0	0	1	1	5
rs786203823	17	43091657	A	G	S1292P	1	1	1	0	0	1	1	5
rs876658221	17	43090970	A	G	S1387P	1	1	1	0	0	1	1	5
rs879254042	17	43070963	A	G	S1672P	1	1	1	0	0	1	1	5
rs1057518639	17	43070951	A	G	S1676P	1	1	1	0	1	1	0	5
rs45553935	17	43057122	A	G	V1757A	1	1	1	1	0	1	0	5
rs397509218	17	43067624	A	T	H1707Q	1	1	1	1	0	1	0	5
rs1060502339	17	43099778	A	T	L182M	1	1	1	1	0	1	0	5
rs1402064476	17	43124048	C	A	A17S	1	1	1	1	0	1	0	5
rs80357078	17	43049162	C	A	A1810S	1	1	1	1	0	1	0	5
rs80357446	17	43115729	C	A	C44F	1	1	1	0	1	1	0	5
rs80357150	17	43106528	C	A	C47F	1	1	1	0	1	1	0	5
rs80357112	17	43051063	C	A	D1799Y	1	1	1	0	1	1	0	5
rs876660267	17	43093295	C	A	D746Y	1	1	1	1	1	0	0	5
rs80357077	17	43092713	C	A	D940Y	1	1	1	1	1	0	0	5
rs1441376381	17	43091017	C	A	G1371V	1	1	1	1	0	0	1	5
rs80357069	17	43049164	C	A	G1809V	1	1	1	1	0	1	0	5
rs80356854	17	43057052	C	A	K1780N	1	1	1	1	0	1	0	5
rs1800062	17	43115746	C	A	K38N	1	1	1	1	0	1	0	5
rs748876625	17	43104122	C	A	L147F	1	1	1	1	0	1	0	5
rs80357475	17	43124094	C	A	M1I	1	1	1	1	0	1	0	5
rs80357332	17	43045792	C	A	Q1847H	1	1	1	1	0	1	0	5
rs1437476481	17	43104156	C	A	R136I	1	1	1	1	0	0	1	5
rs80357389	17	43076488	C	A	R1516M	1	1	1	1	0	1	0	5
rs80357224	17	43094011	C	A	R507I	1	1	1	1	0	1	0	5
rs80356913	17	43106456	C	A	R71M	1	1	1	1	0	1	0	5
rs876660129	17	43082493	C	A	S1423I	1	1	1	0	0	1	1	5
rs80357125	17	43063940	C	A	V1717L	1	1	1	1	0	1	0	5
rs730881501	17	43045758	C	A	V1859L	1	1	1	1	0	1	0	5
rs780952576	17	43094636	C	A	V299L	1	1	1	1	0	1	0	5
rs80357344	17	43093607	C	G	D642H	1	1	1	1	0	1	0	5
rs80357114	17	43093286	C	G	D749H	1	1	1	1	1	0	0	5
rs80357124	17	43092533	C	G	E1000Q	1	1	1	1	0	1	0	5
rs80356876	17	43091874	C	G	E1219D	1	1	1	1	0	1	0	5
rs876659708	17	43091669	C	G	E1288Q	1	1	1	1	0	1	0	5
rs766004110	17	43124028	C	G	E23D	1	1	1	1	0	1	0	5
rs562553169	17	43094360	C	G	E391Q	1	1	1	1	0	1	0	5
rs876658306	17	43093436	C	G	E699Q	1	1	1	1	0	1	0	5
rs1346819781	17	43057101	C	G	G1764A	1	1	1	1	0	1	0	5
rs1135401931	17	43099775	C	G	G183R	1	1	1	1	0	1	0	5
rs879255289	17	43106499	C	G	G57R	1	1	1	1	0	1	0	5
rs80356857	17	43090944	C	G	Q1395H	1	1	1	1	0	1	0	5
rs398122684	17	43082489	C	G	Q1424H	1	1	1	1	0	1	0	5
rs80356849	17	43045732	C	G	Q1867H	1	1	1	1	0	1	0	5
rs80357389	17	43076488	C	G	R1516T	1	1	1	1	0	1	0	5
rs80356913	17	43106456	C	G	R71T	1	1	1	1	0	1	0	5
rs1414091448	17	43092469	C	G	S1021T	1	1	1	1	0	1	0	5
rs776996813	17	43091650	C	G	S1294T	1	1	1	1	0	1	0	5
rs80357368	17	43045748	C	G	S1862T	1	1	1	1	0	1	0	5
rs765183110	17	43082527	C	T	A1412T	1	1	0	1	0	1	1	5
rs370999077	17	43082515	C	T	A1416T	1	1	0	1	0	1	1	5
rs80357150	17	43106528	C	T	C47Y	1	1	1	0	0	1	1	5
rs80357093	17	43106486	C	T	C61Y	1	1	1	0	1	1	0	5
rs55851803	17	43106477	C	T	C64Y	1	1	1	0	1	1	0	5
rs80356923	17	43091891	C	T	E1214K	1	1	1	1	0	1	0	5
rs138608489	17	43076504	C	T	E1511K	1	1	1	1	0	1	0	5
rs80357005	17	43093619	C	T	E638K	1	1	1	1	0	1	0	5
rs431825405	17	43091435	C	T	G1366S	1	1	1	1	0	0	1	5
rs398122700	17	43045797	C	T	G1846R	1	1	1	1	1	0	0	5
rs80356913	17	43106456	C	T	R71K	1	1	1	1	0	1	0	5
rs587776487	17	43092361	C	T	S1057N	1	1	1	1	0	1	0	5
rs80357368	17	43045748	C	T	S1862N	1	1	1	0	0	1	1	5
rs80357261	17	43070957	C	T	V1674M	1	1	1	1	0	1	0	5
rs1060502335	17	43094860	G	A	A224V	1	1	1	1	0	1	0	5
rs137894496	17	43074457	G	A	L1538F	1	1	1	1	1	0	0	5
rs147703239	17	43071206	G	A	L1591F	1	1	1	1	0	1	0	5
rs41286294	17	43093997	G	A	L512F	1	1	1	1	0	1	0	5
rs80357084	17	43106514	G	A	L52F	1	1	1	1	0	1	0	5
rs587782752	17	43092082	G	A	P1150L	1	1	1	1	0	1	0	5
rs876659989	17	43071005	G	A	P1658S	1	1	1	1	0	1	0	5
rs587781588	17	43092364	G	A	S1056F	1	1	1	1	0	1	0	5
rs1055368753	17	43092010	G	A	S1174F	1	1	1	0	0	1	1	5
rs80357440	17	43091638	G	A	S1298L	1	1	1	0	0	1	1	5
rs748839289	17	43082469	G	A	S1431F	1	1	1	1	0	1	0	5
rs863224761	17	43074465	G	A	S1535F	1	1	1	0	1	1	0	5
rs80356938	17	43070962	G	A	S1672F	1	1	1	0	1	1	0	5
rs80357104	17	43063361	G	A	S1743F	1	1	1	0	1	1	0	5
rs878854961	17	43097286	G	A	S184F	1	1	1	0	0	1	1	5
rs55688530	17	43097280	G	A	S186F	1	1	1	0	0	1	1	5
rs786203152	17	43124086	G	A	S4F	1	1	1	0	0	1	1	5
rs786201945	17	43049131	G	A	T1820I	1	1	1	1	0	1	0	5
rs62625301	17	43094140	G	A	T464I	1	1	1	1	0	1	0	5
rs786202389	17	43057091	G	C	H1767Q	1	1	1	1	0	1	0	5
rs80357000	17	43115767	G	C	I31M	1	1	1	1	0	1	0	5
rs41286294	17	43093997	G	C	L512V	1	1	1	1	0	1	0	5
rs771076131	17	43094727	G	C	N268K	1	1	1	1	0	1	0	5
rs587782752	17	43092082	G	C	P1150R	1	1	1	1	0	1	0	5
rs28897688	17	43091818	G	C	P1238R	1	1	1	1	1	0	0	5
rs1301724072	17	43071133	G	C	P1615R	1	1	1	1	0	1	0	5
rs397509244	17	43057084	G	C	P1770A	1	1	1	1	0	1	0	5
rs80357462	17	43057083	G	C	P1770R	1	1	1	1	0	1	0	5
rs576727185	17	43051084	G	C	P1792A	1	1	1	1	0	1	0	5
rs80357225	17	43094758	G	C	P258R	1	1	1	1	0	1	0	5
rs56100707	17	43093990	G	C	P514R	1	1	1	1	0	1	0	5
rs766484283	17	43104251	G	C	S104R	1	1	1	0	1	1	0	5
rs587781588	17	43092364	G	C	S1056C	1	1	1	1	0	1	0	5
rs786202620	17	43104222	G	C	S114C	1	1	0	1	0	1	1	5
rs386833394	17	43091569	G	C	S1321C	1	1	1	1	0	1	0	5
rs753940026	17	43099792	G	C	S177C	1	1	1	1	0	1	0	5
rs80356967	17	43104953	G	C	S72R	1	1	1	0	1	1	0	5
rs192655097	17	43093075	G	C	S819C	1	1	1	1	0	1	0	5
rs80357034	17	43067610	G	C	T1712R	1	1	1	0	1	1	0	5
rs80357209	17	43104939	G	C	T77R	1	1	1	1	0	1	0	5
rs879253999	17	43094157	G	T	D458E	1	1	1	1	0	1	0	5
rs80357146	17	43057093	G	T	H1767N	1	1	1	1	0	1	0	5
rs397509244	17	43057084	G	T	P1770T	1	1	1	1	0	1	0	5
rs80356902	17	43093634	G	T	P633T	1	1	1	1	0	1	0	5
rs80357011	17	43082575	G	T	Q1396K	1	1	1	0	0	1	1	5
rs80356945	17	43093193	G	T	Q780K	1	1	1	0	0	1	1	5
rs587781588	17	43092364	G	T	S1056Y	1	1	1	1	0	1	0	5
rs876660757	17	43092091	G	T	S1147Y	1	1	1	0	0	1	1	5
rs1060502325	17	43071217	G	T	S1587Y	1	1	1	0	0	1	1	5
rs587783039	17	43093764	G	T	S589R	1	1	1	0	1	1	0	5
rs766572561	17	43091872	T	A	D1220V	1	1	1	0	0	1	1	5
rs80356865	17	43094797	T	A	D245V	1	1	1	1	0	1	0	5
rs431825412	17	43057124	T	A	E1756D	1	1	1	1	0	1	0	5
rs80357042	17	43091566	T	A	K1322I	1	1	1	0	1	0	1	5
rs1396916075	17	43092937	T	A	K865M	1	1	1	0	0	1	1	5
rs80356956	17	43106479	T	A	L63F	1	1	1	1	0	1	0	5
rs1485586275	17	43093060	T	A	N824I	1	1	1	0	1	1	0	5
rs1423203634	17	43091558	T	A	R1325W	1	1	1	1	1	0	0	5
rs273899702	17	43092341	T	A	S1064C	1	1	1	1	0	1	0	5
rs1064794830	17	43076576	T	A	S1487C	1	1	1	1	0	1	0	5
rs397507232	17	43076516	T	A	S1507C	1	1	1	1	0	1	0	5
rs1300771163	17	43094690	T	A	S281C	1	1	1	1	0	1	0	5
rs80357206	17	43092016	T	C	E1172G	1	1	1	1	0	1	0	5
rs80357163	17	43115736	T	C	I42V	1	1	1	1	0	1	0	5
rs431825415	17	43057053	T	C	K1780R	1	1	1	1	0	1	0	5
rs1135401844	17	43094144	T	C	K463E	1	1	1	1	0	1	0	5
rs747212786	17	43106520	T	C	K50E	1	1	1	0	0	1	1	5
rs587781768	17	43082530	T	C	M1411V	1	1	1	1	0	1	0	5
rs80357287	17	43124096	T	C	M1V	1	1	1	1	0	1	0	5
rs770090143	17	43094383	T	C	N383S	1	1	1	1	0	1	0	5
rs1410232200	17	43093192	T	C	Q780R	1	1	1	1	0	1	0	5
rs863224753	17	43093694	T	C	R613G	1	1	1	1	0	1	0	5
rs1433746078	17	43093187	T	C	S782G	1	1	1	1	0	1	0	5
rs869320787	17	43094141	T	C	T464A	1	1	1	1	0	1	0	5
rs28897673	17	43104249	T	C	Y105C	1	1	1	1	1	0	0	5
rs56055578	17	43104174	T	C	Y130C	1	1	1	0	1	1	0	5
rs876659885	17	43094137	T	C	Y465C	1	1	1	0	1	1	0	5
rs1419874153	17	43092079	T	G	D1151A	1	1	0	1	0	1	1	5
rs80357184	17	43092352	T	G	E1060A	1	1	1	1	0	1	0	5
rs273900713	17	43091869	T	G	E1221A	1	1	0	1	0	1	1	5
rs397507233	17	43099876	T	G	E149A	1	1	1	1	0	1	0	5
rs191373374	17	43063351	T	G	E1746D	1	1	1	1	0	1	0	5
rs80356861	17	43094631	T	G	E300D	1	1	1	1	0	1	0	5
rs786201944	17	43093618	T	G	E638A	1	1	1	1	0	1	0	5
rs876659991	17	43057092	T	G	H1767P	1	1	1	0	1	1	0	5
rs80357163	17	43115736	T	G	I42L	1	1	1	1	0	1	0	5
rs750437234	17	43076545	T	G	K1497T	1	1	1	1	0	1	0	5
rs886037794	17	43071111	T	G	K1622N	1	1	1	1	0	1	0	5
rs80357303	17	43071113	T	G	K1622Q	1	1	1	1	0	1	0	5
rs80356877	17	43094605	T	G	K309T	1	1	1	1	0	1	0	5
rs80357282	17	43093691	T	G	K614Q	1	1	1	0	0	1	1	5
rs786202533	17	43124031	T	G	L22F	1	1	1	1	0	1	0	5
rs879255494	17	43095899	T	G	Q206P	1	1	1	1	1	0	0	5
rs730881465	17	43104947	T	G	Q74H	1	1	1	1	0	1	0	5
rs80357479	17	43092362	T	G	S1057R	1	1	1	1	0	1	0	5
rs80357299	17	43045749	T	G	S1862R	1	1	1	1	0	1	0	5
rs879255491	17	43067632	T	G	T1705P	1	1	1	0	0	1	1	5
rs80357432	17	43057069	C	G	E1775Q	0	1	1	1	0	1	1	5
rs397509136	17	43091459	C	T	E1358K	0	1	1	1	0	1	1	5
rs786202998	17	43091030	C	T	E1367K	0	1	1	1	0	1	1	5
rs876658381	17	43099877	C	T	E149K	0	1	1	1	0	1	1	5
rs80357167	17	43094066	C	T	E489K	0	1	1	1	1	1	0	5
rs55650082	17	43093742	C	T	E597K	0	1	1	1	0	1	1	5
rs397509229	17	43063898	C	T	G1731R	0	1	1	1	1	1	0	5
rs397509327	17	43094707	C	T	G275D	0	1	1	1	1	1	0	5
rs80357121	17	43093630	G	A	P634L	0	1	1	1	1	1	0	5
rs730881446	17	43049149	T	G	K1814T	0	1	1	1	0	1	1	5
rs587782887	17	43045794	G	T	Q1847K	1	0	1	1	1	1	1	6
rs587781472	17	43067680	A	T	F1689I	1	1	1	1	1	1	0	6
rs863224765	17	43051086	C	G	G1791A	1	1	1	1	1	1	0	6
rs397509222	17	43063951	T	G	D1713A	1	1	1	1	1	1	0	6
rs1476854015	17	43067688	A	T	V1686E	1	1	1	1	1	1	0	6
rs80357204	17	43067683	T	C	K1688E	1	1	1	1	1	1	0	6
rs80357493	17	43093950	C	G	K527N	1	1	1	1	1	1	0	6
rs80357112	17	43051063	C	G	D1799H	1	1	1	1	1	1	0	6
rs273902786	17	43094777	G	A	R252C	1	1	1	1	1	1	0	6
rs397509048	17	43092303	T	A	R1076S	1	1	1	1	1	1	0	6
rs80357313	17	43092304	C	G	R1076T	1	1	1	1	1	1	0	6
rs876660280	17	43045736	T	C	Y1866C	1	1	1	1	1	1	0	6
rs80357142	17	43097265	A	T	V191D	1	1	1	1	1	1	0	6
rs398122693	17	43057132	C	T	D1754N	1	1	1	1	1	1	0	6
rs80357270	17	43057131	T	A	D1754V	1	1	1	1	1	1	0	6
rs62625285	17	43099844	C	T	G160R	1	1	1	1	1	1	0	6
rs748675395	17	43094645	T	C	R296G	1	1	1	1	1	1	0	6
rs1361427704	17	43092172	A	T	V1120D	1	1	1	1	1	1	0	6
rs80356968	17	43070959	A	T	M1673K	1	1	1	1	1	1	0	6
rs780367532	17	43092646	T	C	E962G	1	1	1	1	1	1	0	6
rs1800709	17	43093010	G	A	R841W	1	1	1	1	1	1	0	6
rs80357257	17	43091602	G	C	T1310R	1	1	1	1	1	0	1	6
rs587780803	17	43099816	T	G	Q169P	1	1	1	1	1	0	1	6
rs751124745	17	43094617	C	A	C305F	1	1	1	1	1	0	1	6
rs80356994	17	43124078	G	A	R7C	1	1	1	1	1	0	1	6
rs876659510	17	43047703	C	A	G1824C	1	1	1	1	1	0	1	6
rs876659403	17	43094372	A	T	S387T	1	1	1	1	0	1	1	6
rs587782340	17	43045772	A	G	V1854A	1	1	1	1	0	1	1	6
rs80357202	17	43091477	C	T	E1352K	1	1	1	1	0	1	1	6
rs55639854	17	43091500	T	C	D1344G	1	1	1	1	0	1	1	6
rs878854944	17	43104244	A	T	F107I	1	1	1	1	0	1	1	6
rs878854965	17	43094629	T	C	K301R	1	1	1	1	0	1	1	6
rs80357453	17	43093967	C	T	D522N	1	1	1	1	0	1	1	6
rs1060502324	17	43092922	G	A	A870V	1	1	1	1	0	1	1	6
rs397509071	17	43104217	C	T	E116K	1	1	1	1	0	1	1	6
rs55808233	17	43049179	A	G	M1804T	1	1	1	1	0	1	1	6
rs80357309	17	43082506	C	G	E1419Q	1	1	1	1	0	1	1	6
rs863224763	17	43063919	A	G	Y1724H	1	1	1	1	0	1	1	6
rs8176153	17	43094708	C	T	G275S	1	1	1	1	0	1	1	6
rs1450793674	17	43091642	A	G	S1297P	1	1	1	0	1	1	1	6
rs80357370	17	43106529	A	C	C47G	1	1	1	1	1	1	0	6
rs80357064	17	43106478	A	C	C64G	1	1	1	1	1	1	0	6
rs869320780	17	43057127	A	C	F1755L	1	1	1	1	1	1	0	6
rs80357463	17	43051098	A	C	I1787S	1	1	1	1	1	1	0	6
rs398122634	17	43094152	A	C	I460R	1	1	1	1	1	1	0	6
rs80357116	17	43106465	A	C	I68R	1	1	1	1	0	1	1	6
rs80357323	17	43045739	A	C	L1865R	1	1	1	1	1	1	0	6
rs80357061	17	43067616	A	C	M1710R	1	1	1	1	1	1	0	6
rs41293463	17	43051071	A	C	M1796R	1	1	1	1	1	1	0	6
rs397509298	17	43097281	A	C	S186A	1	1	1	1	0	1	1	6
rs80357285	17	43092941	A	C	S864A	1	1	1	1	0	1	1	6
rs80357023	17	43057107	A	C	V1762G	1	1	1	1	1	1	0	6
rs397508869	17	43094138	A	C	Y465D	1	1	1	1	1	1	0	6
rs80357164	17	43115745	A	G	C39R	1	1	1	1	1	1	0	6
rs80357064	17	43106478	A	G	C64R	1	1	1	1	1	1	0	6
rs1298544053	17	43115732	A	G	F43S	1	1	1	1	0	1	1	6
rs397509146	17	43090957	A	G	I1391T	1	1	1	1	0	1	1	6
rs900082291	17	43045706	A	G	I1876T	1	1	1	1	0	1	1	6
rs751078452	17	43104153	A	G	L137P	1	1	1	1	1	0	1	6
rs778319854	17	43090954	A	G	L1392S	1	1	1	1	0	1	1	6
rs397509157	17	43082508	A	G	L1418S	1	1	1	1	0	1	1	6
rs80357323	17	43045739	A	G	L1865P	1	1	1	1	1	1	0	6
rs80357086	17	43106480	A	G	L63S	1	1	1	1	0	1	1	6
rs760864137	17	43093174	A	G	L786P	1	1	1	1	1	1	0	6
rs80357473	17	43082562	A	G	M1400T	1	1	1	1	0	1	1	6
rs273900729	17	43082529	A	G	M1411T	1	1	1	1	0	1	1	6
rs80356929	17	43124044	A	G	M18T	1	1	1	1	0	1	1	6
rs483353100	17	43063362	A	G	S1743P	1	1	1	0	1	1	1	6
rs80357017	17	43124065	A	G	V11A	1	1	1	1	0	1	1	6
rs80357132	17	43063888	A	G	V1734A	1	1	1	1	0	1	1	6
rs864622244	17	43049155	A	G	V1812A	1	1	1	1	0	1	1	6
rs80356959	17	43045761	A	G	W1858R	1	1	1	1	1	1	0	6
rs587781761	17	43099787	A	G	Y179H	1	1	1	1	0	1	1	6
rs80356993	17	43063937	A	T	C1718S	1	1	1	1	1	1	0	6
rs80357065	17	43049168	A	T	C1808S	1	1	1	1	1	1	0	6
rs80357164	17	43115745	A	T	C39S	1	1	1	1	1	1	0	6
rs28897672	17	43106487	A	T	C61S	1	1	1	1	1	1	0	6
rs80356957	17	43057129	A	T	F1755I	1	1	1	1	1	1	0	6
rs80357492	17	43082541	A	T	L1407H	1	1	1	1	0	1	1	6
rs41293463	17	43051071	A	T	M1796K	1	1	1	1	1	1	0	6
rs1450793674	17	43091642	A	T	S1297T	1	1	1	1	0	1	1	6
rs905812561	17	43115754	A	T	S36T	1	1	1	1	0	1	1	6
rs1247437511	17	43063370	A	T	V1740E	1	1	1	1	1	1	0	6
rs80357107	17	43045757	A	T	V1859E	1	1	1	1	1	1	0	6
rs80356867	17	43092164	C	A	D1123Y	1	1	1	1	1	1	0	6
rs876660940	17	43076549	C	A	D1496Y	1	1	1	1	0	1	1	6
rs778775133	17	43124093	C	A	D2Y	1	1	1	1	0	1	1	6
rs752715574	17	43094597	C	A	G312C	1	1	1	1	1	0	1	6
rs80357189	17	43104183	C	A	S127I	1	1	1	0	1	1	1	6
rs45444999	17	43063882	C	A	S1736I	1	1	1	0	1	1	1	6
rs80357239	17	43063372	C	A	W1739C	1	1	1	1	1	1	0	6
rs80356914	17	43045759	C	A	W1858C	1	1	1	1	1	1	0	6
rs876660558	17	43094376	C	A	W385C	1	1	1	1	1	1	0	6
rs80357074	17	43057075	C	G	A1773P	1	1	1	1	1	1	0	6
rs80357019	17	43045743	C	G	A1864P	1	1	1	0	1	1	1	6
rs753256448	17	43092923	C	G	A870P	1	1	1	1	0	1	1	6
rs863224755	17	43104895	C	G	A92P	1	1	1	0	1	1	1	6
rs1064793052	17	43124017	C	G	C27S	1	1	1	1	1	1	0	6
rs80187739	17	43067608	C	G	D1713H	1	1	1	1	1	1	0	6
rs80357424	17	43092353	C	G	E1060Q	1	1	1	1	0	1	1	6
rs372047427	17	43124030	C	G	E23Q	1	1	1	1	0	1	1	6
rs80357066	17	43115763	C	G	E33Q	1	1	1	1	0	1	1	6
rs80356907	17	43093586	C	G	E649Q	1	1	1	1	0	1	1	6
rs80356860	17	43063909	C	G	G1727A	1	1	1	1	1	1	0	6
rs886040864	17	43063910	C	G	G1727R	1	1	1	1	1	1	0	6
rs397507245	17	43057087	C	G	G1769R	1	1	1	1	0	1	1	6
rs876660907	17	43051108	C	G	G1784R	1	1	1	1	1	1	0	6
rs397509246	17	43057071	C	G	R1774T	1	1	1	1	0	1	1	6
rs786203567	17	43094368	C	G	R388T	1	1	1	1	0	1	1	6
rs876660322	17	43093702	C	G	R610T	1	1	1	1	0	1	1	6
rs377595653	17	43057123	C	G	V1757L	1	1	1	1	0	1	1	6
rs41293461	17	43063373	C	G	W1739S	1	1	1	1	1	1	0	6
rs80357078	17	43049162	C	T	A1810T	1	1	1	1	0	1	1	6
rs80357247	17	43092094	C	T	C1146Y	1	1	1	1	1	0	1	6
rs80357498	17	43115744	C	T	C39Y	1	1	1	1	1	1	0	6
rs80356954	17	43091591	C	T	D1314N	1	1	0	1	1	1	1	6
rs778775133	17	43124093	C	T	D2N	1	1	1	1	0	1	1	6
rs80356921	17	43091876	C	T	E1219K	1	1	1	1	0	1	1	6
rs80357401	17	43070933	C	T	E1682K	1	1	1	1	1	1	0	6
rs80357432	17	43057069	C	T	E1775K	1	1	1	1	0	1	1	6
rs398122662	17	43092980	C	T	E851K	1	1	1	1	0	1	1	6
rs568753972	17	43071215	C	T	G1588R	1	1	1	1	1	1	0	6
rs80356860	17	43063909	C	T	G1727E	1	1	1	0	1	1	1	6
rs786204269	17	43063900	C	T	G1730E	1	1	1	0	1	1	1	6
rs886038197	17	43063901	C	T	G1730R	1	1	1	1	1	1	0	6
rs398122691	17	43063897	C	T	G1731E	1	1	1	0	1	1	1	6
rs80357450	17	43057116	C	T	G1759E	1	1	1	1	1	1	0	6
rs80356937	17	43057117	C	T	G1759R	1	1	1	1	1	1	0	6
rs397507245	17	43057087	C	T	G1769S	1	1	1	1	0	1	1	6
rs80357007	17	43051107	C	T	G1784E	1	1	1	1	1	1	0	6
rs80357069	17	43049164	C	T	G1809D	1	1	1	1	1	1	0	6
rs80357221	17	43094147	C	T	G462R	1	1	1	1	1	1	0	6
rs80357357	17	43104165	C	T	R133H	1	1	1	1	1	1	0	6
rs41293459	17	43063930	C	T	R1720Q	1	1	1	1	1	1	0	6
rs80357442	17	43057077	C	T	R1772Q	1	1	1	1	1	1	0	6
rs397509246	17	43057071	C	T	R1774K	1	1	1	1	0	1	1	6
rs273902776	17	43045766	C	T	R1856Q	1	1	1	1	0	1	1	6
rs80357189	17	43104183	C	T	S127N	1	1	1	1	0	1	1	6
rs763351631	17	43094398	C	T	S378N	1	1	1	1	0	1	1	6
rs1029805420	17	43082512	C	T	V1417M	1	1	1	1	0	1	1	6
rs80357125	17	43063940	C	T	V1717M	1	1	1	1	0	1	1	6
rs145758886	17	43049156	C	T	V1812M	1	1	1	1	0	1	1	6
rs80357268	17	43045773	C	T	V1854M	1	1	1	1	0	1	1	6
rs730881501	17	43045758	C	T	V1859M	1	1	1	1	0	1	1	6
rs80357028	17	43057074	G	A	A1773V	1	1	1	1	0	1	1	6
rs730881447	17	43045742	G	A	A1864V	1	1	1	1	0	1	1	6
rs1418676444	17	43094626	G	A	A302V	1	1	1	1	0	1	1	6
rs80357096	17	43071229	G	A	P1583L	1	1	1	1	1	1	0	6
rs80357025	17	43051083	G	A	P1792L	1	1	1	1	1	1	0	6
rs398122695	17	43051068	G	A	P1797L	1	1	1	1	1	0	1	6
rs876660096	17	43124023	G	A	P25L	1	1	1	1	0	1	1	6
rs786203319	17	43115759	G	A	P34L	1	1	1	1	0	1	1	6
rs1064793357	17	43115760	G	A	P34S	1	1	1	1	0	1	1	6
rs55770810	17	43063931	G	A	R1720W	1	1	1	1	1	1	0	6
rs41286300	17	43092935	G	A	R866C	1	1	1	1	1	1	0	6
rs1220408343	17	43104195	G	A	S123F	1	1	1	0	1	1	1	6
rs80357390	17	43070950	G	A	S1676F	1	1	1	0	1	1	1	6
rs55914168	17	43093180	G	A	S784L	1	1	1	0	1	1	1	6
rs80357209	17	43104939	G	A	T77M	1	1	1	1	0	1	1	6
rs431825393	17	43104879	G	A	T97I	1	1	0	1	1	1	1	6
rs28897696	17	43063903	G	C	A1729G	1	1	1	1	0	1	1	6
rs80357199	17	43094692	G	C	A280G	1	1	1	1	0	1	1	6
rs80356858	17	43063913	G	C	L1726V	1	1	1	1	0	1	1	6
rs80357025	17	43051083	G	C	P1792R	1	1	1	1	1	1	0	6
rs1800751	17	43047676	G	C	P1833A	1	1	1	1	0	1	1	6
rs786202286	17	43106483	G	C	P62R	1	1	1	1	0	1	1	6
rs80357121	17	43093630	G	C	P634R	1	1	1	1	1	1	0	6
rs80357094	17	43063881	G	C	S1736R	1	1	1	1	1	1	0	6
rs80356986	17	43091002	G	C	T1376R	1	1	1	1	0	1	1	6
rs28897696	17	43063903	G	T	A1729E	1	1	1	1	1	1	0	6
rs730881447	17	43045742	G	T	A1864E	1	1	1	1	0	1	1	6
rs273899683	17	43093111	G	T	A807E	1	1	1	1	1	1	0	6
rs1060502353	17	43115739	G	T	H41N	1	1	1	1	0	1	1	6
rs910555398	17	43063925	G	T	L1722M	1	1	1	1	0	1	1	6
rs80357084	17	43106514	G	T	L52I	1	1	1	1	0	1	1	6
rs398122695	17	43051068	G	T	P1797H	1	1	1	1	1	0	1	6
rs397509313	17	43124024	G	T	P25T	1	1	1	1	0	1	1	6
rs183557525	17	43115753	G	T	S36Y	1	1	1	1	0	1	1	6
rs863224752	17	43094397	G	T	S378R	1	1	1	1	1	1	0	6
rs80356880	17	43115750	G	T	T37K	1	1	1	1	0	1	1	6
rs273898675	17	43106462	G	T	T69N	1	1	1	1	0	1	1	6
rs431825402	17	43091617	T	A	D1305V	1	1	1	1	0	1	1	6
rs80357276	17	43115738	T	A	H41L	1	1	1	0	1	1	1	6
rs879254266	17	43094017	T	A	K505I	1	1	1	1	0	1	1	6
rs768001441	17	43092967	T	A	Q855L	1	1	1	0	1	1	1	6
rs771577266	17	43057070	T	A	R1774S	1	1	1	1	1	1	0	6
rs587781833	17	43094765	T	A	R256W	1	1	1	1	1	0	1	6
rs55767801	17	43094609	T	A	S308C	1	1	1	1	0	1	1	6
rs80357227	17	43057113	T	C	D1760G	1	1	1	1	1	1	0	6
rs773841328	17	43115774	T	C	E29G	1	1	1	1	0	1	1	6
rs730882166	17	43067625	T	C	H1707R	1	1	1	1	0	1	1	6
rs80357276	17	43115738	T	C	H41R	1	1	1	1	0	1	1	6
rs756948486	17	43106475	T	C	K65E	1	1	1	1	0	1	1	6
rs80357306	17	43082563	T	C	M1400V	1	1	1	1	0	1	1	6
rs1246721860	17	43090966	T	C	Q1388R	1	1	1	1	0	1	1	6
rs80356972	17	43090945	T	C	Q1395R	1	1	1	1	0	1	1	6
rs750344093	17	43082574	T	C	Q1396R	1	1	1	1	0	1	1	6
rs80357040	17	43047678	T	C	Q1832R	1	1	1	1	0	1	1	6
rs373655067	17	43106489	T	C	Q60R	1	1	1	1	0	1	1	6
rs398122644	17	43093703	T	C	R610G	1	1	1	1	0	1	1	6
rs80357382	17	43106457	T	C	R71G	1	1	1	1	1	1	0	6
rs397509227	17	43063928	T	C	T1721A	1	1	1	1	0	1	1	6
rs587782456	17	43063879	T	C	Y1737C	1	1	1	0	1	1	1	6
rs80357258	17	43045712	T	C	Y1874C	1	1	1	0	1	1	1	6
rs876660844	17	43115762	T	G	E33A	1	1	1	1	0	1	1	6
rs80357347	17	43063347	T	G	K1748Q	1	1	1	1	0	1	1	6
rs202168814	17	43124037	T	G	K20N	1	1	1	1	1	1	0	6
rs876659193	17	43094392	T	G	Q380P	1	1	1	1	1	1	0	6
rs587782870	17	43090952	T	G	T1393P	1	1	1	1	0	1	1	6
rs786204116	17	43057053	TT	A	K1780W	1	1	1	1	0	1	1	6
rs1182000313	17	43045730	C	A	C1868F	0	1	1	1	1	1	1	6
rs397509295	17	43045729	G	C	C1868W	0	1	1	1	1	1	1	6
rs80357098	17	43092949	A	C	F861C	1	1	1	1	1	1	1	7
rs80357358	17	43047687	A	T	V1829E	1	1	1	1	1	1	1	7
rs28897698	17	43047685	C	A	V1830F	1	1	1	1	1	1	1	7
rs761640584	17	43082568	T	A	D1398V	1	1	1	1	1	1	1	7
rs761640584	17	43082568	T	C	D1398G	1	1	1	1	1	1	1	7
rs397507244	17	43063335	C	T	E1752K	1	1	1	1	1	1	1	7
rs1367077331	17	43049176	A	C	V1805G	1	1	1	1	1	1	1	7
rs397508915	17	43093663	A	G	L623P	1	1	1	1	1	1	1	7
rs1135401834	17	43124035	A	C	I21S	1	1	1	1	1	1	1	7
rs80356950	17	43093661	C	T	E624K	1	1	1	1	1	1	1	7
rs80357428	17	43051077	G	A	T1794I	1	1	1	1	1	1	1	7
rs80357176	17	43094537	G	A	R332W	1	1	1	1	1	1	1	7
rs80357235	17	43094410	G	A	T374I	1	1	1	1	1	1	1	7
rs1064793533	17	43063358	A	T	I1744N	1	1	1	1	1	1	1	7
rs431825416	17	43051093	A	C	C1789G	1	1	1	1	1	1	1	7
rs80357164	17	43115745	A	C	C39G	1	1	1	1	1	1	1	7
rs886040898	17	43115743	A	C	C39W	1	1	1	1	1	1	1	7
rs80357327	17	43115730	A	C	C44G	1	1	1	1	1	1	1	7
rs587781632	17	43106476	A	C	C64W	1	1	1	1	1	1	1	7
rs1064796143	17	43063906	A	C	I1728S	1	1	1	1	1	1	1	7
rs80356916	17	43082550	A	C	L1404R	1	1	1	1	1	1	1	7
rs878854951	17	43082520	A	C	L1414R	1	1	1	1	1	1	1	7
rs397507242	17	43063912	A	C	L1726R	1	1	1	1	1	1	1	7
rs80357474	17	43049188	A	C	L1801R	1	1	1	1	1	1	1	7
rs273897660	17	43106522	A	C	L49R	1	1	1	1	1	1	1	7
rs1230532866	17	43106525	A	C	M48R	1	1	1	1	1	1	1	7
rs80357017	17	43124065	A	C	V11G	1	1	1	1	1	1	1	7
rs80357243	17	43063885	A	C	V1735G	1	1	1	1	1	1	1	7
rs45553935	17	43057122	A	C	V1757G	1	1	1	1	1	1	1	7
rs80357451	17	43047681	A	C	V1831G	1	1	1	1	1	1	1	7
rs80357107	17	43045757	A	C	V1859G	1	1	1	1	1	1	1	7
rs1235706456	17	43115756	A	C	V35G	1	1	1	1	1	1	1	7
rs80356959	17	43045761	A	C	W1858G	1	1	1	1	1	1	1	7
rs863224763	17	43063919	A	C	Y1724D	1	1	1	1	1	1	1	7
rs80356993	17	43063937	A	G	C1718R	1	1	1	1	1	1	1	7
rs80357410	17	43124027	A	G	C24R	1	1	1	1	1	1	1	7
rs80357327	17	43115730	A	G	C44R	1	1	1	1	1	1	1	7
rs28897672	17	43106487	A	G	C61R	1	1	1	1	1	1	1	7
rs1396926041	17	43091854	A	G	F1226S	1	1	1	1	1	1	1	7
rs397509237	17	43057128	A	G	F1755S	1	1	1	1	1	1	1	7
rs80356905	17	43051113	A	G	F1782S	1	1	1	1	1	1	1	7
rs1301025671	17	43045799	A	G	I1845T	1	1	1	1	1	1	1	7
rs80356916	17	43082550	A	G	L1404P	1	1	1	1	1	1	1	7
rs80357492	17	43082541	A	G	L1407P	1	1	1	1	1	1	1	7
rs878854951	17	43082520	A	G	L1414P	1	1	1	1	1	1	1	7
rs397507242	17	43063912	A	G	L1726P	1	1	1	1	1	1	1	7
rs80357281	17	43051104	A	G	L1785P	1	1	1	1	1	1	1	7
rs80357474	17	43049188	A	G	L1801P	1	1	1	1	1	1	1	7
rs398122697	17	43049170	A	G	L1807P	1	1	1	1	1	1	1	7
rs398122702	17	43045754	A	G	L1860S	1	1	1	1	1	1	1	7
rs80356996	17	43045709	A	G	L1875P	1	1	1	1	1	1	1	7
rs80357438	17	43124032	A	G	L22S	1	1	1	1	1	1	1	7
[truncated: 61 more rows]

## Sheet: BRCA2
id	chrom	position	ref	alt	Mutation	SIFT	PolyPhen	SNAP2	I_MUT	PHD_SNP	Level	CGI	Scores	cBio	Count
rs80359233	13	32397012	C	G	Q3206E	0	0	0	0	0	0	0	0	TCGA-B	1
rs80358664	13	32338626	C	G	S1424C	0	0	0	0	0	0	0	0	TCGA-B	1
rs55939572	13	32332434	A	G	N319S	0	0	0	0	0	0	0	0	TCGA-B	2
rs1323152399	13	32398313	A	G	K3267R	0	0	0	0	0	1	0	1	TCGA-B	1
rs876659031	13	32341083	C	G	S2243C	0	0	0	0	0	1	0	1	TCGA-B	1
rs80358698	13	32339025	C	G	T1557S	0	0	0	1	0	0	0	1	TCGA-B	1
rs730881520	13	32337509	G	A	A1052T	0	0	0	1	0	0	0	1	TCGA-B	1
rs80358956	13	32330967	G	A	D244N	0	0	0	1	0	0	0	1	TCGA-B	1
rs1316343192	13	32339980	G	T	K1875N	0	0	0	1	0	0	0	1	TCGA-B	1
rs750084851	13	32340851	G	T	V2166L	0	0	0	1	0	0	0	1	TCGA-B	1
rs80358493	13	32336576	G	T	V741L	0	0	0	1	0	0	0	1	TCGA-B	1
rs1028371302	13	32339254	C	G	I1633M	1	0	0	1	0	0	0	2	TCGA-B	1
rs753721331	13	32339436	G	C	R1694T	1	0	0	1	0	0	0	2	TCGA-B	1
rs147961615	13	32340412	C	A	N2019K	0	0	0	1	0	1	0	2	TCGA-B	1
rs587781848	13	32337302	C	A	P983T	0	0	0	1	0	1	0	2	TCGA-B	1
rs567476314	13	32398510	C	G	L3333V	0	1	0	1	0	0	0	2	TCGA-B	1
rs546682485	13	32397010	C	T	A3205V	0	0	0	1	0	1	0	2	TCGA-B	1
rs876661086	13	32356471	G	A	M2493I	0	0	0	1	0	1	0	2	TCGA-B	1
rs730881568	13	32379367	G	A	M2935I	0	0	0	1	0	1	0	2	TCGA-B	1
rs28897749	13	32363384	G	A	V2728I	0	0	0	1	0	1	0	2	TCGA-B	1
rs528504546	13	32397009	G	C	A3205P	0	0	0	0	1	1	0	2	TCGA-B	1
rs28897708	13	32332992	T	C	I505T	0	1	0	1	0	0	0	2	TCGA-B	1
rs1484798037	13	32336729	T	C	Y792H	0	0	1	1	0	0	0	2	TCGA-B	1
rs398122782	13	32338832	G	C	E1493Q	0	1	0	1	0	0	0	2	TCGA-B	2
rs876658412	13	32340878	G	C	E2175Q	0	1	0	1	0	0	0	2	TCGA-B	3
rs1438502006	13	32332996	C	G	F506L	0	1	0	1	0	1	0	3	TCGA-B	1
rs1302254513	13	32363486	C	T	P2762S	0	0	1	1	0	1	0	3	TCGA-B	1
rs80358755	13	32339667	G	A	G1771D	0	0	1	1	1	0	0	3	TCGA-B	1
rs80359162	13	32379882	C	T	A3029V	1	0	0	1	0	1	0	3	TCGA-B	2
rs431825279	13	32398679	C	T	S3389F	1	1	1	0	0	0	0	3	TCGA-B	2
rs375125172	13	32325111	C	T	R118C	0	0	1	1	1	0	0	3	TCGA-B	2
rs1799954	13	32340455	C	T	R2034C	1	1	1	0	1	0	0	4	TCGA-B	1
rs11571747	13	32371035	A	C	E2856A	1	1	0	1	0	1	0	4	TCGA-B	1
rs56272235	13	32344569	A	G	I2285V	1	1	0	1	0	1	0	4	TCGA-B	1
rs28897760	13	32396977	C	A	P3194Q	1	1	0	1	0	0	1	4	TCGA-B	1
rs80358507	13	32319250	T	C	F81L	1	1	0	1	0	1	0	4	TCGA-B	1
rs876660484	13	32329481	G	A	D224N	0	0	1	1	1	1	0	4	TCGA-B	1
rs56328701	13	32333264	G	A	D596N	0	1	1	1	0	1	0	4	TCGA-B	1
rs80358397	13	32398664	G	A	R3384Q	0	1	1	1	0	1	0	4	TCGA-B	1
rs80358906	13	32341158	G	A	R2268K	1	0	0	1	0	1	1	4	TCGA-B	2
rs777305503	13	32354994	C	T	P2381S	1	1	0	1	0	1	0	4	TCGA-B	2
rs759741090	13	32339805	C	G	S1817C	1	0	1	1	0	1	0	4	TCGA-B	3
rs80359169	13	32332391	G	A	E305K	1	0	1	1	0	1	1	5	TCGA-B	1
rs587780646	13	32333316	T	G	L613R	1	1	1	1	1	0	0	5	TCGA-B	1
rs28897759	13	32394803	A	T	N3124I	1	1	1	0	1	1	0	5	TCGA-B	1
rs45469092	13	32379479	C	T	R2973C	1	1	1	1	1	0	0	5	TCGA-B	1
rs755783122	13	32370998	G	A	E2844K	1	1	0	1	0	1	1	5	TCGA-B	1
rs587778124	13	32337713	G	C	E1120Q	1	1	0	1	0	1	1	5	TCGA-B	1
rs368952892	13	32339096	G	C	E1581Q	1	1	1	1	0	1	0	5	TCGA-B	2
rs886040798	13	32379450	C	T	S2963L	1	1	1	0	0	1	1	5	TCGA-B	2
rs276174906	13	32370463	C	G	P2798R	1	1	0	1	0	1	1	5	TCGA-B	2
rs4987047	13	32379392	A	T	I2944F	1	1	0	1	1	1	1	6	TCGA-B	1
rs80359186	13	32380107	A	G	D3073G	1	1	1	1	0	1	1	6	TCGA-B	1
rs80359152	13	32379800	G	A	E3002K	1	1	0	1	1	1	1	6	TCGA-B	1
rs200924727	13	32380035	A	G	Y3049C	1	1	1	0	1	1	1	6	TCGA-B	2
rs28897761	13	32398537	G	A	E3342K	1	1	0	1	1	1	1	6	TCGA-B	2
rs780279081	13	32337452	G	C	D1033H	1	1	1	1	0	1	1	6	TCGA-B	3
rs80359104	13	32370992	C	T	R2842C	1	1	1	1	1	1	1	7	TCGA-B	1
rs1479448614	13	32370525	G	A	D2819N	1	1	1	1	1	1	1	7	TCGA-B	1
rs587780663	13	32370978	G	T	G2837V	1	1	1	1	1	1	1	7	TCGA-B	1
rs200924727	13	32380035	A	C	Y3049S	1	1	1	1	1	1	1	7	TCGA-B	2
rs1060502443	13	32394716	A	G	D3095G	1	1	1	1	1	1	1	7	TCGA-B	2
rs80359083	13	32370448	G	T	G2793V	1	1	1	1	1	1	1	7	TCGA-B	2
rs369663895	13	32398760	A	C	K3416T	0	0	0	0	0	0	0	0
rs80358591	13	32337806	A	C	I1151L	0	0	0	0	0	0	0	0
rs876659799	13	32338232	A	C	I1293L	0	0	0	0	0	0	0	0
rs143667871	13	32338607	A	C	I1418L	0	0	0	0	0	0	0	0
rs80358694	13	32338954	A	C	K1533N	0	0	0	0	0	0	0	0
rs763490852	13	32355193	A	C	N2447T	0	0	0	0	0	0	0	0
rs1476681505	13	32398175	A	C	N3221T	0	0	0	0	0	0	0	0
rs587782755	13	32332743	A	C	N422T	0	0	0	0	0	0	0	0
rs751250810	13	32398595	A	C	Q3361P	0	0	0	0	0	0	0	0
rs80358712	13	32339249	A	C	S1632R	0	0	0	0	0	0	0	0
rs80358495	13	32336600	A	C	S749R	0	0	0	0	0	0	0	0
rs398122788	13	32339261	A	G	K1636E	0	0	0	0	0	0	0	0
rs11571660	13	32340840	A	G	K2162R	0	0	0	0	0	0	0	0
rs786201753	13	32337162	A	G	K936R	0	0	0	0	0	0	0	0
rs28897722	13	32338037	A	G	N1228D	0	0	0	0	0	0	0	0
rs876660772	13	32355021	A	G	N2390D	0	0	0	0	0	0	0	0
rs1196515495	13	32363318	A	G	N2706D	0	0	0	0	0	0	0	0
rs876659245	13	32396955	A	G	N3187D	0	0	0	0	0	0	0	0
rs1329182873	13	32396956	A	G	N3187S	0	0	0	0	0	0	0	0
rs80358401	13	32398733	A	G	N3407S	0	0	0	0	0	0	0	0
rs1282599125	13	32336580	A	G	Q742R	0	0	0	0	0	0	0	0
rs80358588	13	32337792	A	T	E1146V	0	0	0	0	0	0	0	0
rs786202713	13	32396907	A	T	I3171L	0	0	0	0	0	0	0	0
rs397508016	13	32379416	A	T	M2952L	0	0	0	0	0	0	0	0
rs276174863	13	32340084	A	T	N1910I	0	0	0	0	0	0	0	0
rs786202042	13	32332515	A	T	N346I	0	0	0	0	0	0	0	0
rs766384913	13	32336611	C	A	D752E	0	0	0	0	0	0	0	0
rs55977008	13	32355003	C	A	Q2384K	0	0	0	0	0	0	0	0
rs794726967	13	32332517	C	A	Q347K	0	0	0	0	0	0	0	0
rs397507274	13	32333183	C	A	Q569K	0	0	0	0	0	0	0	0
rs80358494	13	32336579	C	A	Q742K	0	0	0	0	0	0	0	0
rs80358496	13	32336615	C	A	Q754K	0	0	0	0	0	0	0	0
rs775564742	13	32376674	C	G	N2879K	0	0	0	0	0	0	0	0
rs587780652	13	32338436	C	G	Q1361E	0	0	0	0	0	0	0	0
rs1060502425	13	32338859	C	G	Q1502E	0	0	0	0	0	0	0	0
rs876661062	13	32339006	C	G	Q1551E	0	0	0	0	0	0	0	0
rs80358757	13	32339699	C	G	Q1782E	0	0	0	0	0	0	0	0
rs397507859	13	32340824	C	G	Q2157E	0	0	0	0	0	0	0	0
rs55977008	13	32355003	C	G	Q2384E	0	0	0	0	0	0	0	0
rs80358494	13	32336579	C	G	Q742E	0	0	0	0	0	0	0	0
rs149565664	13	32329491	C	T	A227V	0	0	0	0	0	0	0	0
rs769698255	13	32333349	C	T	A624V	0	0	0	0	0	0	0	0
rs80358672	13	32338727	C	T	H1458Y	0	0	0	0	0	0	0	0
rs1405631299	13	32340623	C	T	H2090Y	0	0	0	0	0	0	0	0
rs1359997059	13	32330943	C	T	H236Y	0	0	0	0	0	0	0	0
rs431825306	13	32337789	C	T	P1145L	0	0	0	0	0	0	0	0
rs786201716	13	32319131	C	T	P41L	0	0	0	0	0	0	0	0
rs376931156	13	32319218	C	T	S70F	0	0	0	0	0	0	0	0
rs777421358	13	32337006	C	T	S884L	0	0	0	0	0	0	0	0
rs80358698	13	32339025	C	T	T1557I	0	0	0	0	0	0	0	0
rs753067824	13	32332371	C	T	T298I	0	0	0	0	0	0	0	0
rs80359158	13	32332383	C	T	T302I	0	0	0	0	0	0	0	0
rs876660857	13	32336322	C	T	T656I	0	0	0	0	0	0	0	0
rs398122743	13	32336607	C	T	T751I	0	0	0	0	0	0	0	0
rs753690365	13	32338338	G	A	S1328N	0	0	0	0	0	0	0	0
rs869320795	13	32340132	G	A	S1926N	0	0	0	0	0	0	0	0
rs587782691	13	32332455	G	A	S326N	0	0	0	0	0	0	0	0
rs1060502452	13	32398637	G	A	S3375N	0	0	0	0	0	0	0	0
rs763642189	13	32398712	G	A	S3400N	0	0	0	0	0	0	0	0
rs1164384033	13	32340806	G	A	V2151I	0	0	0	0	0	0	0	0
rs750084851	13	32340851	G	A	V2166I	0	0	0	0	0	0	0	0
rs80358720	13	32339309	G	C	A1652P	0	0	0	0	0	0	0	0
rs587782158	13	32336645	G	C	E764Q	0	0	0	0	0	0	0	0
rs753690365	13	32338338	G	C	S1328T	0	0	0	0	0	0	0	0
rs1403318277	13	32338665	G	C	S1437T	0	0	0	0	0	0	0	0
rs80358678	13	32338791	G	C	S1479T	0	0	0	0	0	0	0	0
rs889208749	13	32398700	G	C	S3396T	0	0	0	0	0	0	0	0
rs863224589	13	32339059	G	T	K1568N	0	0	0	0	0	0	0	0
rs80358617	13	32338118	G	T	V1255L	0	0	0	0	0	0	0	0
rs777094216	13	32363348	G	T	V2716L	0	0	0	0	0	0	0	0
rs786202105	13	32336900	G	T	V849L	0	0	0	0	0	0	0	0
rs80358616	13	32325134	T	A	D125E	0	0	0	0	0	0	0	0
rs1304787573	13	32338390	T	A	D1345E	0	0	0	0	0	0	0	0
rs587782612	13	32396957	T	A	N3187K	0	0	0	0	0	0	0	0
rs80358898	13	32341096	T	A	S2247R	0	0	0	0	0	0	0	0
rs1227088794	13	32333084	T	A	S536T	0	0	0	0	0	0	0	0
rs878853582	13	32338616	T	C	F1421L	0	0	0	0	0	0	0	0
rs80358811	13	32340191	T	C	S1946P	0	0	0	0	0	0	0	0
rs869320796	13	32340956	T	C	S2201P	0	0	0	0	0	0	0	0
rs786202991	13	32337985	T	G	D1210E	0	0	0	0	0	0	0	0
rs876658756	13	32340049	T	G	D1898E	0	0	0	0	0	0	0	0
rs367823201	13	32340088	T	G	D1911E	0	0	0	0	0	0	0	0
rs28897742	13	32341069	T	G	D2238E	0	0	0	0	0	0	0	0
rs149753706	13	32337193	T	G	D946E	0	0	0	0	0	0	0	0
rs142243359	13	32336629	T	G	S758R	0	0	0	0	0	0	0	0
rs730881600	13	32398763	A	G	Y3417C	0	0	1	0	0	0	0	1
rs80358568	13	32325082	A	C	N108T	1	0	0	0	0	0	0	1
rs76635144	13	32398499	A	C	N3329T	1	0	0	0	0	0	0	1
rs80358707	13	32339204	A	C	S1617R	1	0	0	0	0	0	0	1
rs760482209	13	32339428	A	T	K1691N	1	0	0	0	0	0	0	1
rs761505767	13	32355202	A	T	N2450I	1	0	0	0	0	0	0	1
rs876660857	13	32336322	C	A	T656N	1	0	0	0	0	0	0	1
rs1408001886	13	32398192	C	G	Q3227E	1	0	0	0	0	0	0	1
rs1310128359	13	32376781	C	T	A2915V	1	0	0	0	0	0	0	1
rs80358656	13	32338416	C	T	T1354M	1	0	0	0	0	0	0	1
rs80358479	13	32333367	C	T	T630I	1	0	0	0	0	0	0	1
rs994146384	13	32333091	G	T	S538I	1	0	0	0	0	0	0	1
rs80358888	13	32340923	G	T	V2190L	1	0	0	0	0	0	0	1
rs1300992894	13	32339229	A	C	E1625A	0	0	0	1	0	0	0	1
rs1243093278	13	32339557	A	C	E1734D	0	0	0	1	0	0	0	1
rs773679288	13	32340136	A	C	E1927D	0	0	0	1	0	0	0	1
rs431825335	13	32340139	A	C	E1928D	0	0	0	1	0	0	0	1
rs1057520433	13	32398503	A	C	E3330D	0	0	0	1	0	0	0	1
rs750341436	13	32332887	A	C	E470A	0	0	0	1	0	0	0	1
rs1456382766	13	32336550	A	C	E732A	0	0	0	1	0	0	0	1
rs1214763097	13	32336832	A	C	E826A	0	0	0	1	0	0	0	1
rs56248502	13	32338445	A	C	I1364L	0	0	0	1	0	0	0	1
rs431825333	13	32340062	A	C	I1903L	0	0	0	1	0	0	0	1
rs786202013	13	32340800	A	C	I2149L	0	0	0	1	0	0	0	1
rs1300492434	13	32341160	A	C	I2269L	0	0	0	1	0	0	0	1
rs41293507	13	32357772	A	C	I2550L	0	0	0	1	0	0	0	1
rs1371216781	13	32362569	A	C	I2618L	0	0	0	1	0	0	0	1
rs80359053	13	32363300	A	C	I2700L	0	0	0	1	0	0	0	1
rs864622352	13	32332940	A	C	I488L	0	0	0	1	0	0	0	1
rs747748537	13	32336708	A	C	I785L	0	0	0	1	0	0	0	1
rs28897717	13	32337299	A	C	I982L	0	0	0	1	0	0	0	1
rs1309043028	13	32337944	A	C	K1197Q	0	0	0	1	0	0	0	1
rs1375943534	13	32339655	A	C	K1767T	0	0	0	1	0	0	0	1
rs397507847	13	32340739	A	C	K2128N	0	0	0	1	0	0	0	1
rs398122554	13	32340738	A	C	K2128T	0	0	0	1	0	0	0	1
rs786204069	13	32355195	A	C	K2448Q	0	0	0	1	0	0	0	1
rs80358400	13	32398688	A	C	K3392T	0	0	0	1	0	0	0	1
rs371454630	13	32332622	A	C	K382Q	0	0	0	1	0	0	0	1
rs55962656	13	32333298	A	C	K607T	0	1	0	0	0	0	0	1
rs398122755	13	32337190	A	C	K945N	0	0	0	0	1	0	0	1
rs750671399	13	32339575	A	C	L1740F	0	0	0	1	0	0	0	1
rs397507314	13	32325129	A	C	M124L	0	0	0	1	0	0	0	1
rs786203000	13	32398162	A	C	M3217L	0	0	0	1	0	0	0	1
rs876659778	13	32398255	A	C	M3248L	0	0	0	1	0	0	0	1
rs80358718	13	32339280	A	C	N1642T	0	0	0	0	0	1	0	1
rs587781493	13	32379867	A	C	N3024T	0	0	0	0	0	1	0	1
rs758959174	13	32339700	A	C	Q1782P	0	0	0	1	0	0	0	1
rs876658875	13	32340550	A	C	Q2065H	0	0	0	1	0	0	0	1
rs587782071	13	32338130	A	C	S1259R	0	0	0	1	0	0	0	1
rs398122550	13	32340626	A	C	S2091R	0	0	0	0	1	0	0	1
rs1060502442	13	32357838	A	C	S2572R	0	0	0	0	1	0	0	1
rs1052441923	13	32332454	A	C	S326R	0	0	0	0	1	0	0	1
rs587782589	13	32336291	A	C	S646R	0	0	0	1	0	0	0	1
rs1368861313	13	32336957	A	C	T868P	0	0	0	1	0	0	0	1
rs80358798	13	32340081	A	G	D1909G	0	0	0	1	0	0	0	1
rs200943373	13	32340087	A	G	D1911G	0	0	0	1	0	0	0	1
rs876658259	13	32340369	A	G	D2005G	0	0	0	1	0	0	0	1
rs786201744	13	32340837	A	G	D2161G	0	0	0	1	0	0	0	1
rs1060502473	13	32330968	A	G	D244G	0	0	0	1	0	0	0	1
rs1244056899	13	32332494	A	G	D339G	0	0	0	1	0	0	0	1
rs864622276	13	32319305	A	G	D99G	0	0	0	1	0	0	0	1
rs886037808	13	32337828	A	G	E1158G	0	0	0	1	0	0	0	1
rs876660887	13	32339004	A	G	E1550G	0	0	0	1	0	0	0	1
rs398122536	13	32339991	A	G	E1879G	0	0	0	1	0	0	0	1
rs398122761	13	32337657	A	G	H1101R	0	0	0	1	0	0	0	1
rs80358586	13	32325100	A	G	H114R	0	0	0	1	0	0	0	1
rs587782201	13	32337849	A	G	H1165R	0	0	0	1	0	0	0	1
rs373483754	13	32339274	A	G	H1640R	0	0	0	1	0	0	0	1
rs779931795	13	32326518	A	G	H179R	0	0	0	1	0	0	0	1
rs80358804	13	32340108	A	G	H1918R	0	0	0	1	0	0	0	1
rs780621780	13	32340417	A	G	H2021R	0	0	0	1	0	0	0	1
rs786203039	13	32340468	A	G	H2038R	0	0	0	1	0	0	0	1
rs397507366	13	32340624	A	G	H2090R	0	0	0	1	0	0	0	1
rs80358938	13	32330944	A	G	H236R	0	0	0	1	0	0	0	1
rs1060502470	13	32371095	A	G	H2876R	0	0	0	1	0	0	0	1
rs749827015	13	32319164	A	G	H52R	0	0	0	1	0	0	0	1
rs760792501	13	32337084	A	G	H910R	0	0	0	1	0	0	0	1
rs80358571	13	32337611	A	G	I1086V	0	0	0	1	0	0	0	1
rs876658683	13	32337761	A	G	I1136V	0	0	0	1	0	0	0	1
rs80358591	13	32337806	A	G	I1151V	0	0	0	1	0	0	0	1
rs276174834	13	32337854	A	G	I1167V	0	0	0	1	0	0	0	1
rs202230438	13	32337917	A	G	I1188V	0	0	0	1	0	0	0	1
rs587782720	13	32338127	A	G	I1258V	0	0	0	1	0	0	0	1
rs780544697	13	32338400	A	G	I1349V	0	0	0	1	0	0	0	1
rs56248502	13	32338445	A	G	I1364V	0	0	0	1	0	0	0	1
rs143667871	13	32338607	A	G	I1418V	0	0	0	1	0	0	0	1
rs778282885	13	32338661	A	G	I1436V	0	0	0	1	0	0	0	1
rs1159807733	13	32338784	A	G	I1477V	0	0	0	1	0	0	0	1
rs80358713	13	32339252	A	G	I1633V	0	0	0	1	0	0	0	1
rs878853588	13	32339470	A	G	I1705M	0	0	0	1	0	0	0	1
rs80358737	13	32339468	A	G	I1705V	0	0	0	1	0	0	0	1
rs35335654	13	32339525	A	G	I1724V	0	0	0	1	0	0	0	1
rs1060502406	13	32339728	A	G	I1791M	0	0	0	1	0	0	0	1
rs1214903860	13	32339726	A	G	I1791V	0	0	0	1	0	0	0	1
rs80358770	13	32339834	A	G	I1827V	0	0	0	1	0	0	0	1
rs587781455	13	32339948	A	G	I1865V	0	0	0	1	0	0	0	1
rs921917607	13	32339975	A	G	I1874V	0	0	0	1	0	0	0	1
rs431825333	13	32340062	A	G	I1903V	0	0	0	1	0	0	0	1
rs779020831	13	32340125	A	G	I1924V	0	0	0	1	0	0	0	1
rs79538375	13	32340140	A	G	I1929V	0	0	0	1	0	0	0	1
rs80358817	13	32340224	A	G	I1957V	0	0	0	1	0	0	0	1
rs987442188	13	32340241	A	G	I1962M	0	0	0	1	0	0	0	1
rs747406932	13	32340239	A	G	I1962V	0	0	0	1	0	0	0	1
rs80358848	13	32340454	A	G	I2033M	0	0	0	1	0	0	0	1
rs772846629	13	32340452	A	G	I2033V	0	0	0	1	0	0	0	1
rs80358850	13	32340473	A	G	I2040V	0	0	0	1	0	0	0	1
rs398122552	13	32340670	A	G	I2105M	0	0	0	1	0	0	0	1
rs397507368	13	32340668	A	G	I2105V	0	0	0	1	0	0	0	1
rs786202013	13	32340800	A	G	I2149V	0	0	0	1	0	0	0	1
rs772645059	13	32341187	A	G	I2278V	0	0	0	1	0	0	0	1
rs876661032	13	32346877	A	G	I2330V	0	0	0	1	0	0	0	1
rs876658231	13	32354883	A	G	I2344V	0	0	0	1	0	0	0	1
rs771175403	13	32355162	A	G	I2437V	0	0	0	1	0	0	0	1
rs751576331	13	32356433	A	G	I2481V	0	0	0	1	0	0	0	1
rs80359053	13	32363300	A	G	I2700V	0	0	0	1	0	0	0	1
rs950154005	13	32370554	A	G	I2828M	0	0	0	1	0	0	0	1
rs80359098	13	32370552	A	G	I2828V	0	0	0	1	0	0	0	1
rs398122719	13	32379754	A	G	I2986M	0	0	0	1	0	0	0	1
rs758549281	13	32379752	A	G	I2986V	0	0	0	1	0	0	0	1
rs879255336	13	32394751	A	G	I3107V	0	0	0	1	0	0	0	1
rs377123889	13	32396943	A	G	I3183V	0	0	0	1	0	0	0	1
rs374321381	13	32398183	A	G	I3224V	0	0	0	1	0	0	0	1
rs80359255	13	32398449	A	G	I3312M	0	0	0	1	0	0	0	1
rs80359254	13	32398447	A	G	I3312V	0	0	0	1	0	0	0	1
rs80358390	13	32398602	A	G	I3363M	0	0	0	1	0	0	0	1
rs778147500	13	32398684	A	G	I3391V	0	0	0	1	0	0	0	1
rs1801426	13	32398747	A	G	I3412V	0	0	0	1	0	0	0	1
rs770479195	13	32316467	A	G	I3V	0	0	0	1	0	0	0	1
rs786203710	13	32332724	A	G	I416V	0	0	0	1	0	0	0	1
rs760559435	13	32332919	A	G	I481V	0	0	0	1	0	0	0	1
rs571155346	13	32332942	A	G	I488M	0	0	0	1	0	0	0	1
rs730881511	13	32333102	A	G	I542V	0	0	0	1	0	0	0	1
rs759415233	13	32333150	A	G	I558V	0	0	0	1	0	0	0	1
rs864622172	13	32336351	A	G	I666V	0	0	0	1	0	0	0	1
rs774968533	13	32336459	A	G	I702V	0	0	0	1	0	0	0	1
rs431825295	13	32336540	A	G	I729V	0	0	0	1	0	0	0	1
rs747748537	13	32336708	A	G	I785V	0	0	0	1	0	0	0	1
rs80358502	13	32319244	A	G	I79V	0	0	0	1	0	0	0	1
rs786202072	13	32336933	A	G	I860V	0	0	0	1	0	0	0	1
rs397507294	13	32337182	A	G	I943V	0	0	0	1	0	0	0	1
rs80358562	13	32337525	A	G	K1057R	0	0	0	1	0	0	0	1
rs80358569	13	32337600	A	G	K1082R	0	0	0	1	0	0	0	1
rs876659782	13	32337636	A	G	K1094R	0	0	0	1	0	0	0	1
rs80358594	13	32337813	A	G	K1153R	0	0	0	1	0	0	0	1
rs28897720	13	32337894	A	G	K1180R	0	0	0	1	0	0	0	1
rs1337434023	13	32338176	A	G	K1274R	0	0	0	1	0	0	0	1
rs1344698119	13	32338296	A	G	K1314R	0	0	0	1	0	0	0	1
rs397507330	13	32338712	A	G	K1453E	0	0	0	1	0	0	0	1
rs730881532	13	32338904	A	G	K1517E	0	0	0	1	0	0	0	1
rs80358706	13	32339195	A	G	K1614E	0	0	0	1	0	0	0	1
rs748213879	13	32339246	A	G	K1631E	0	0	1	0	0	0	0	1
rs763743962	13	32339300	A	G	K1649E	0	0	0	1	0	0	0	1
rs28897733	13	32339388	A	G	K1678R	0	0	0	1	0	0	0	1
rs879255459	13	32339838	A	G	K1828R	0	0	0	1	0	0	0	1
rs431825332	13	32339933	A	G	K1860E	0	0	0	1	0	0	0	1
rs587782583	13	32339979	A	G	K1875R	0	0	0	1	0	0	0	1
rs80358821	13	32340246	A	G	K1964R	0	0	0	1	0	0	0	1
rs959089047	13	32340255	A	G	K1967R	0	0	0	1	0	0	0	1
rs876660593	13	32340393	A	G	K2013R	0	0	0	1	0	0	0	1
rs80358875	13	32340737	A	G	K2128E	0	0	0	1	0	0	0	1
rs1252272917	13	32340864	A	G	K2170R	0	0	0	1	0	0	0	1
rs1135401833	13	32340917	A	G	K2188E	0	0	0	1	0	0	0	1
rs397507367	13	32316522	A	G	K21R	0	0	0	1	0	0	0	1
rs431825353	13	32355196	A	G	K2448R	0	0	0	1	0	0	0	1
rs771265005	13	32363346	A	G	K2715R	0	0	0	1	0	0	0	1
rs1060502428	13	32363424	A	G	K2741R	0	1	0	0	0	0	0	1
rs200157227	13	32379381	A	G	K2940R	0	0	0	0	0	1	0	1
rs587782779	13	32379807	A	G	K3004R	0	0	0	1	0	0	0	1
rs587782599	13	32394827	A	G	K3132R	0	0	0	1	0	0	0	1
rs876659246	13	32398661	A	G	K3383R	0	0	0	1	0	0	0	1
rs80358406	13	32332511	A	G	K345E	0	0	0	1	0	0	0	1
rs1396595519	13	32332623	A	G	K382R	0	0	0	1	0	0	0	1
rs876659050	13	32333069	A	G	K531E	0	0	0	1	0	0	0	1
rs786203702	13	32333124	A	G	K549R	0	0	0	1	0	0	0	1
rs80358467	13	32333288	A	G	K604E	0	0	0	1	0	0	0	1
rs876659502	13	32336682	A	G	K776R	0	0	0	1	0	0	0	1
rs587782737	13	32336744	A	G	K797E	0	0	0	1	0	0	0	1
rs1270048702	13	32336840	A	G	K829E	0	0	0	1	0	0	0	1
rs876659600	13	32337074	A	G	K907E	0	0	0	1	0	0	0	1
rs761350030	13	32337222	A	G	K956R	0	0	0	1	0	0	0	1
rs398122757	13	32337297	A	G	K981R	0	0	0	1	0	0	0	1
rs398122760	13	32337623	A	G	M1090V	0	0	0	1	0	0	0	1
rs781119815	13	32338472	A	G	M1373V	0	0	0	1	0	0	0	1
rs431825320	13	32338778	A	G	M1475V	0	0	0	1	0	0	0	1
rs786202206	13	32339588	A	G	M1745V	0	0	0	1	0	0	0	1
rs926784722	13	32340929	A	G	M2192V	0	0	0	1	0	0	0	1
rs1417110572	13	32341139	A	G	M2262V	0	0	0	1	0	0	0	1
rs80358945	13	32355030	A	G	M2393V	0	0	0	1	0	0	0	1
rs878853607	13	32363228	A	G	M2676V	0	0	0	1	0	0	0	1
rs1357866774	13	32332337	A	G	M287V	0	0	0	1	0	0	0	1
rs397508016	13	32379416	A	G	M2952V	0	0	0	1	0	0	0	1
rs786203000	13	32398162	A	G	M3217V	0	0	0	1	0	0	0	1
rs786203635	13	32336735	A	G	M794V	0	0	0	1	0	0	0	1
rs786203814	13	32336798	A	G	M815V	0	0	0	1	0	0	0	1
rs786201837	13	32337134	A	G	M927V	0	0	0	1	0	0	0	1
rs876660083	13	32337323	A	G	M990V	0	0	0	1	0	0	0	1
rs780365246	13	32337359	A	G	N1002D	0	0	0	1	0	0	0	1
rs776196396	13	32337423	A	G	N1023S	0	0	0	0	0	1	0	1
rs762752733	13	32337552	A	G	N1066S	0	0	0	1	0	0	0	1
rs747462525	13	32337603	A	G	N1083S	0	0	0	1	0	0	0	1
rs80358568	13	32325082	A	G	N108S	0	0	0	1	0	0	0	1
rs1799951	13	32337795	A	G	N1147S	0	1	0	0	0	0	0	1
rs780927790	13	32337948	A	G	N1198S	0	0	0	1	0	0	0	1
rs786202838	13	32338038	A	G	N1228S	0	0	0	1	0	0	0	1
rs1060502384	13	32338191	A	G	N1279S	0	0	0	1	0	0	0	1
rs1165204072	13	32338443	A	G	N1363S	0	0	0	1	0	0	0	1
rs749624669	13	32338485	A	G	N1377S	0	0	0	1	0	0	0	1
rs117187202	13	32338731	A	G	N1459S	0	0	0	1	0	0	0	1
rs1222884804	13	32338773	A	G	N1473S	0	0	0	1	0	0	0	1
rs545444016	13	32338857	A	G	N1501S	0	0	0	1	0	0	0	1
rs786202703	13	32339150	A	G	N1599D	0	0	0	1	0	0	0	1
rs149759218	13	32339151	A	G	N1599S	0	0	0	1	0	0	0	1
rs774484160	13	32339153	A	G	N1600D	0	0	0	1	0	0	0	1
rs80358709	13	32339211	A	G	N1619S	0	0	0	1	0	0	0	1
rs587781599	13	32339324	A	G	N1657D	0	0	0	1	0	0	0	1
rs1060502382	13	32339325	A	G	N1657S	0	0	0	1	0	0	0	1
rs730881536	13	32339472	A	G	N1706S	0	0	0	1	0	0	0	1
rs80358739	13	32339508	A	G	N1718S	0	0	0	1	0	0	0	1
rs766080044	13	32339544	A	G	N1730S	0	0	0	1	0	0	0	1
rs80358750	13	32339627	A	G	N1758D	0	0	0	1	0	0	0	1
rs587781580	13	32339820	A	G	N1822S	0	0	0	1	0	0	0	1
rs80358769	13	32339826	A	G	N1824S	0	0	0	1	0	0	0	1
rs587782601	13	32339853	A	G	N1833S	0	0	0	1	0	0	0	1
rs80358771	13	32339858	A	G	N1835D	0	0	0	1	0	0	0	1
rs1282916502	13	32339859	A	G	N1835S	0	0	0	1	0	0	0	1
rs1302337975	13	32339994	A	G	N1880S	0	0	0	1	0	0	0	1
rs878853591	13	32340153	A	G	N1933S	0	0	0	1	0	0	0	1
rs80358808	13	32340159	A	G	N1935S	0	0	0	1	0	0	0	1
rs1060502402	13	32340444	A	G	N2030S	0	0	0	1	0	0	0	1
rs398122549	13	32340507	A	G	N2051S	0	0	0	1	0	0	0	1
rs398122544	13	32316519	A	G	N20S	0	0	0	1	0	0	0	1
rs80358874	13	32340693	A	G	N2113S	0	0	0	1	0	0	0	1
rs80358878	13	32340789	A	G	N2145S	0	0	0	1	0	0	0	1
rs768512381	13	32340792	A	G	N2146S	0	0	0	1	0	0	0	1
rs587780554	13	32330941	A	G	N235S	0	0	0	1	0	0	0	1
rs1379054137	13	32354974	A	G	N2374S	0	0	0	1	0	0	0	1
rs876658292	13	32355126	A	G	N2425D	0	0	0	1	0	0	0	1
rs4986859	13	32355192	A	G	N2447D	0	0	0	1	0	0	0	1
rs398122580	13	32355207	A	G	N2452D	0	0	0	1	0	0	0	1
rs786202262	13	32355226	A	G	N2458S	0	0	0	1	0	0	0	1
rs786203755	13	32356449	A	G	N2486S	0	0	0	1	0	0	0	1
rs1330144220	13	32363298	A	G	N2699S	0	0	0	1	0	0	0	1
rs80359055	13	32363319	A	G	N2706S	0	0	0	1	0	0	0	1
rs587782763	13	32363427	A	G	N2742S	0	0	0	1	0	0	0	1
rs1060502491	13	32332433	A	G	N319D	0	1	0	0	0	0	0	1
rs80359235	13	32397033	A	G	N3213D	0	1	0	0	0	0	0	1
rs1060502409	13	32398466	A	G	N3318S	0	1	0	0	0	0	0	1
rs76635144	13	32398499	A	G	N3329S	0	0	0	1	0	0	0	1
rs767708749	13	32332559	A	G	N361D	0	0	0	1	0	0	0	1
rs1314446584	13	32332583	A	G	N369D	0	0	0	1	0	0	0	1
rs876658943	13	32332593	A	G	N372S	0	0	0	1	0	0	0	1
rs80358414	13	32332689	A	G	N404S	0	0	0	0	0	1	0	1
rs777093572	13	32332857	A	G	N460S	0	0	0	1	0	0	0	1
rs370692951	13	32332875	A	G	N466S	0	0	0	1	0	0	0	1
rs587781794	13	32333144	A	G	N556D	0	0	0	1	0	0	0	1
rs80358450	13	32319173	A	G	N55S	0	0	0	1	0	0	0	1
rs80358453	13	32333156	A	G	N560D	0	0	0	1	0	0	0	1
rs1192851278	13	32319175	A	G	N56D	0	0	0	1	0	0	0	1
rs1060502388	13	32333345	A	G	N623D	0	0	0	1	0	0	0	1
rs773619645	13	32336304	A	G	N650S	0	0	0	1	0	0	0	1
rs1193025774	13	32336373	A	G	N673S	0	0	0	1	0	0	0	1
rs574039421	13	32336843	A	G	N830D	0	0	0	1	0	0	0	1
rs786202809	13	32336844	A	G	N830S	0	0	0	1	0	0	0	1
rs997313713	13	32336982	A	G	N876S	0	0	0	1	0	0	0	1
rs80358526	13	32337012	A	G	N886S	0	0	0	1	0	0	0	1
rs1020818778	13	32337020	A	G	N889D	0	0	0	1	0	0	0	1
rs55736268	13	32337053	A	G	N900D	0	0	0	1	0	0	0	1
rs1060502435	13	32337219	A	G	N955S	0	0	0	1	0	0	0	1
rs775890004	13	32337288	A	G	N978S	0	0	0	1	0	0	0	1
rs944205640	13	32325136	A	G	Q126R	0	0	0	0	0	1	0	1
rs56317927	13	32338710	A	G	Q1452R	0	0	0	1	0	0	0	1
rs80358674	13	32326115	A	G	Q147R	0	0	0	1	0	0	0	1
rs764435740	13	32338881	A	G	Q1509R	0	0	0	1	0	0	0	1
rs544688816	13	32339040	A	G	Q1562R	0	0	0	1	0	0	0	1
rs1183489363	13	32339562	A	G	Q1736R	0	1	0	0	0	0	0	1
rs758959174	13	32339700	A	G	Q1782R	0	0	0	1	0	0	0	1
rs1364714267	13	32340315	A	G	Q1987R	0	0	0	1	0	0	0	1
rs80358835	13	32340348	A	G	Q1998R	0	0	0	1	0	0	0	1
rs80358845	13	32340426	A	G	Q2024R	0	0	0	1	0	0	0	1
rs1456778960	13	32340825	A	G	Q2157R	0	0	0	1	0	0	0	1
rs1252591831	13	32356581	A	G	Q2530R	0	0	0	1	0	0	0	1
rs753837544	13	32363394	A	G	Q2731R	0	0	0	0	0	1	0	1
rs757088844	13	32379441	A	G	Q2960R	0	0	0	1	0	0	0	1
rs374275215	13	32398706	A	G	Q3398R	0	0	0	1	0	0	0	1
rs55800493	13	32332518	A	G	Q347R	0	0	0	1	0	0	0	1
rs757735681	13	32332935	A	G	Q486R	0	0	0	1	0	0	0	1
rs1374193072	13	32336622	A	G	Q756R	0	0	0	0	0	1	0	1
rs369907107	13	32337605	A	G	S1084G	0	0	0	1	0	0	0	1
rs41293481	13	32337887	A	G	S1178G	0	0	0	1	0	0	0	1
rs1060502476	13	32338379	A	G	S1342G	0	0	0	1	0	0	0	1
rs760602053	13	32339855	A	G	S1834G	0	0	0	1	0	0	0	1
rs1212547389	13	32340206	A	G	S1951G	0	0	0	1	0	0	0	1
rs398122550	13	32340626	A	G	S2091G	0	0	0	1	0	0	0	1
rs80358896	13	32341094	A	G	S2247G	0	0	0	1	0	0	0	1
rs398122597	13	32363330	A	G	S2710G	0	0	0	1	0	0	0	1
rs80359173	13	32380061	A	G	S3058G	0	0	0	1	0	0	0	1
rs1060502481	13	32398636	A	G	S3375G	0	0	0	1	0	0	0	1
rs730881510	13	32332829	A	G	S451G	0	0	0	1	0	0	0	1
rs80358495	13	32336600	A	G	S749G	0	0	0	1	0	0	0	1
rs80358537	13	32337227	A	G	S958G	0	0	0	1	0	0	0	1
rs543339423	13	32338259	A	G	T1302A	0	0	0	1	0	0	0	1
rs28897723	13	32338265	A	G	T1304A	0	0	0	1	0	0	0	1
rs1204269313	13	32338487	A	G	T1378A	0	0	0	1	0	0	0	1
rs878853581	13	32338595	A	G	T1414A	0	0	0	1	0	0	0	1
rs779130725	13	32338622	A	G	T1423A	0	0	0	1	0	0	0	1
rs876659380	13	32338631	A	G	T1426A	0	0	0	1	0	0	0	1
rs80358682	13	32338868	A	G	T1505A	0	0	0	1	0	0	0	1
rs80358690	13	32338913	A	G	T1520A	0	0	0	1	0	0	0	1
rs876659201	13	32339180	A	G	T1609A	0	0	0	1	0	0	0	1
rs879255455	13	32339240	A	G	T1629A	0	0	0	1	0	0	0	1
rs80358738	13	32339474	A	G	T1707A	0	0	0	1	0	0	0	1
rs80358742	13	32339522	A	G	T1723A	0	0	0	1	0	0	0	1
rs786202394	13	32339708	A	G	T1785A	0	0	0	1	0	0	0	1
rs786202618	13	32340014	A	G	T1887A	0	0	0	1	0	0	0	1
rs80358802	13	32340098	A	G	T1915A	0	0	0	1	0	0	0	1
rs587781965	13	32340644	A	G	T2097A	0	0	0	1	0	0	0	1
rs377200598	13	32340995	A	G	T2214A	0	0	0	1	0	0	0	1
rs80358899	13	32341103	A	G	T2250A	0	0	0	1	0	0	0	1
rs80358897	13	32329484	A	G	T225A	0	0	0	1	0	0	0	1
rs80358902	13	32329487	A	G	T226A	0	0	0	1	0	0	0	1
rs1060502390	13	32355015	A	G	T2388A	0	0	0	1	0	0	0	1
rs80358948	13	32355048	A	G	T2399A	0	0	0	1	0	0	0	1
rs587781764	13	32355060	A	G	T2403A	0	0	0	1	0	0	0	1
rs774027004	13	32363498	A	G	T2766A	0	0	0	1	0	0	0	1
rs763287077	13	32376675	A	G	T2880A	0	0	0	1	0	0	0	1
rs587782021	13	32379464	A	G	T2968A	0	0	0	1	0	0	0	1
rs786204284	13	32394904	A	G	T3158A	0	0	0	1	0	0	0	1
rs587782568	13	32394925	A	G	T3165A	0	0	0	1	0	0	0	1
rs80359227	13	32396979	A	G	T3195A	0	0	0	1	0	0	0	1
rs762145450	13	32398429	A	G	T3306A	0	0	0	1	0	0	0	1
rs80358392	13	32398618	A	G	T3369A	0	0	0	1	0	0	0	1
rs80358395	13	32398633	A	G	T3374A	0	0	0	1	0	0	0	1
rs786202571	13	32398672	A	G	T3387A	0	0	0	1	0	0	0	1
rs431825278	13	32398675	A	G	T3388A	0	0	0	1	0	0	0	1
rs80358405	13	32398753	A	G	T3414A	0	0	0	1	0	0	0	1
rs1060502440	13	32332565	A	G	T363A	0	0	0	1	0	0	0	1
rs879255302	13	32332865	A	G	T463A	0	0	0	1	0	0	0	1
rs80358447	13	32333108	A	G	T544A	0	0	0	1	0	0	0	1
rs1335307553	13	32333366	A	G	T630A	0	0	0	1	0	0	0	1
rs398122736	13	32336321	A	G	T656A	0	0	0	1	0	0	0	1
rs55968715	13	32336675	A	G	T774A	0	0	0	1	0	0	0	1
rs1174270999	13	32336918	A	G	T855A	0	0	0	1	0	0	0	1
rs80358528	13	32337071	A	G	T906A	0	0	0	1	0	0	0	1
rs4987046	13	32319134	A	G	Y42C	0	0	1	0	0	0	0	1
rs864622740	13	32340466	A	T	E2037D	0	0	0	1	0	0	0	1
rs1454140894	13	32338554	A	T	H1400L	0	0	1	0	0	0	0	1
rs80358443	13	32333046	A	T	H523L	0	0	1	0	0	0	0	1
rs80358850	13	32340473	A	T	I2040L	0	0	0	1	0	0	0	1
rs374321381	13	32398183	A	T	I3224L	0	0	0	1	0	0	0	1
rs878853557	13	32333291	A	T	I605L	0	0	0	1	0	0	0	1
rs1275087046	13	32339722	A	T	K1789N	0	0	0	1	0	0	0	1
rs864622658	13	32376683	A	T	K2882N	0	0	0	1	0	0	0	1
rs80358491	13	32336530	A	T	K725N	0	0	0	1	0	0	0	1
rs587778119	13	32337247	A	T	K964N	0	1	0	0	0	0	0	1
rs730881579	13	32340610	A	T	L2085F	0	0	0	1	0	0	0	1
rs878853564	13	32337142	A	T	L929F	0	0	0	1	0	0	0	1
rs890665355	13	32339163	A	T	N1603I	0	0	0	0	1	0	0	1
rs764435740	13	32338881	A	T	Q1509L	0	0	0	1	0	0	0	1
rs587782738	13	32339403	A	T	Q1683L	0	0	1	0	0	0	0	1
rs80358852	13	32340480	A	T	Q2042L	0	0	0	0	1	0	0	1
rs55816687	13	32336493	A	T	Q713L	0	0	0	0	0	1	0	1
rs775142613	13	32337614	A	T	T1087S	0	0	0	1	0	0	0	1
rs367789070	13	32337803	A	T	T1150S	0	0	0	1	0	0	0	1
rs779899032	13	32338256	A	T	T1301S	0	0	0	1	0	0	0	1
rs543339423	13	32338259	A	T	T1302S	0	0	0	1	0	0	0	1
rs398122773	13	32338304	A	T	T1317S	0	0	0	1	0	0	0	1
rs1204269313	13	32338487	A	T	T1378S	0	0	0	1	0	0	0	1
rs80358742	13	32339522	A	T	T1723S	0	0	0	1	0	0	0	1
rs876658357	13	32339567	A	T	T1738S	0	0	0	1	0	0	0	1
rs1471965041	13	32340860	A	T	T2169S	0	0	0	1	0	0	0	1
rs377200598	13	32340995	A	T	T2214S	0	0	0	1	0	0	0	1
rs774027004	13	32363498	A	T	T2766S	0	0	0	1	0	0	0	1
rs80358395	13	32398633	A	T	T3374S	0	0	0	1	0	0	0	1
rs786202571	13	32398672	A	T	T3387S	0	0	0	1	0	0	0	1
rs80358444	13	32333051	A	T	T525S	0	0	0	1	0	0	0	1
rs1449458592	13	32339298	C	A	A1648E	0	0	0	1	0	0	0	1
rs80358404	13	32398743	C	A	D3410E	0	0	0	0	0	1	0	1
rs397507301	13	32319312	C	A	F101L	0	0	0	1	0	0	0	1
rs1060502450	13	32338702	C	A	F1449L	0	0	0	1	0	0	0	1
rs80359221	13	32394909	C	A	F3159L	0	0	0	1	0	0	0	1
rs775035051	13	32340818	C	A	L2155I	0	0	0	1	0	0	0	1
rs547590567	13	32332760	C	A	L428I	0	0	0	1	0	0	0	1
rs80358424	13	32332832	C	A	L452I	0	0	0	1	0	0	0	1
rs876660858	13	32337080	C	A	L909I	0	0	0	1	0	0	0	1
rs1057522266	13	32339581	C	A	N1742K	0	0	0	1	0	0	0	1
rs1060502438	13	32338124	C	A	P1257T	0	0	0	1	0	0	0	1
rs80358768	13	32339810	C	A	P1819T	0	0	0	1	0	0	0	1
rs587782722	13	32376693	C	A	P2886T	0	0	0	1	0	0	0	1
rs397507263	13	32332644	C	A	P389Q	0	0	0	1	0	0	0	1
rs397507293	13	32337113	C	A	P920T	0	0	0	1	0	0	0	1
rs80358684	13	32338889	C	A	R1512S	0	0	0	1	0	0	0	1
rs1222542759	13	32339331	C	A	S1659Y	0	0	1	0	0	0	0	1
rs80358880	13	32340798	C	A	S2148Y	0	0	1	0	0	0	0	1
rs778694116	13	32398469	C	A	S3319Y	0	1	0	0	0	0	0	1
rs776937022	13	32340729	C	A	T2125N	0	0	0	1	0	0	0	1
rs730881584	13	32398751	C	A	T3413K	0	0	0	1	0	0	0	1
rs587778122	13	32337840	C	G	A1162G	0	0	0	1	0	0	0	1
rs80358724	13	32339358	C	G	A1668G	0	0	0	1	0	0	0	1
rs748237097	13	32398628	C	G	A3372G	0	0	0	1	0	0	0	1
rs1262187089	13	32333196	C	G	A573G	0	0	0	1	0	0	0	1
rs769698255	13	32333349	C	G	A624G	0	0	0	1	0	0	0	1
rs786202186	13	32333302	C	G	D608E	0	0	0	1	0	0	0	1
rs80358879	13	32340796	C	G	H2147Q	0	0	0	1	0	0	0	1
rs80358592	13	32337808	C	G	I1151M	0	0	0	1	0	0	0	1
rs573514896	13	32339908	C	G	I1851M	0	0	0	1	0	0	0	1
rs1060504611	13	32340613	C	G	I2086M	0	0	0	1	0	0	0	1
rs55638633	13	32337410	C	G	L1019V	0	0	0	1	0	0	0	1
rs748982373	13	32338826	C	G	L1491V	0	0	0	1	0	0	0	1
rs758051329	13	32339081	C	G	L1576V	0	0	0	1	0	0	0	1
rs55875643	13	32340065	C	G	L1904V	0	0	0	1	0	0	0	1
rs1291441180	13	32340428	C	G	L2025V	0	0	0	1	0	0	0	1
rs587779365	13	32340629	C	G	L2092V	0	0	0	1	0	0	0	1
rs547590567	13	32332760	C	G	L428V	0	0	0	1	0	0	0	1
rs879255438	13	32333315	C	G	L613V	0	0	0	1	0	0	0	1
rs771011731	13	32319190	C	G	L61V	0	0	0	1	0	0	0	1
rs749810048	13	32336699	C	G	L782V	0	0	0	1	0	0	0	1
rs80358539	13	32337254	C	G	L967V	0	0	0	1	0	0	0	1
rs80358649	13	32338354	C	G	N1333K	0	0	0	1	0	0	0	1
rs80358673	13	32338732	C	G	N1459K	0	0	0	1	0	0	0	1
rs80358572	13	32337617	C	G	P1088A	0	0	0	1	0	0	0	1
rs762246431	13	32376685	C	G	P2883R	0	0	0	1	0	0	0	1
rs587782722	13	32376693	C	G	P2886A	0	0	0	1	0	0	0	1
rs587782057	13	32332556	C	G	P360A	0	0	0	1	0	0	0	1
rs431825319	13	32338709	C	G	Q1452E	0	0	0	1	0	0	0	1
rs80358806	13	32340128	C	G	Q1925E	0	0	0	0	0	1	0	1
rs397507819	13	32340347	C	G	Q1998E	0	1	0	0	0	0	0	1
rs397507912	13	32355219	C	G	Q2456E	0	1	0	0	0	0	0	1
rs876660447	13	32356487	C	G	Q2499E	0	0	0	1	0	0	0	1
rs397507966	13	32363393	C	G	Q2731E	0	0	0	0	0	1	0	1
rs876660146	13	32339145	C	G	S1597C	0	0	0	0	0	1	0	1
rs1406283407	13	32337819	C	G	T1155S	0	0	0	1	0	0	0	1
rs747993489	13	32338914	C	G	T1520S	0	0	0	1	0	0	0	1
rs80358697	13	32339013	C	G	T1553S	0	0	0	1	0	0	0	1
rs781045037	13	32339226	C	G	T1624S	0	0	0	1	0	0	0	1
rs876658761	13	32340447	C	G	T2031S	0	0	0	1	0	0	0	1
rs80358947	13	32355046	C	G	T2398S	0	0	0	1	0	0	0	1
rs431825355	13	32357815	C	G	T2564S	0	0	0	1	0	0	0	1
rs1064796569	13	32394926	C	G	T3165S	0	0	0	1	0	0	0	1
rs151011453	13	32332866	C	G	T463R	0	0	0	1	0	0	0	1
rs397507268	13	32332950	C	G	T491S	0	0	0	1	0	0	0	1
rs276174828	13	32337090	C	G	T912R	0	0	0	1	0	0	0	1
rs786202795	13	32337099	C	G	T915S	0	0	0	1	0	0	0	1
rs1060502453	13	32337510	C	T	A1052V	0	0	0	1	0	0	0	1
rs587778122	13	32337840	C	T	A1162V	0	0	0	1	0	0	0	1
rs80358599	13	32337864	C	T	A1170V	0	0	0	1	0	0	0	1
rs730881527	13	32338113	C	T	A1253V	0	0	0	1	0	0	0	1
rs770450108	13	32339751	C	T	A1799V	0	0	0	1	0	0	0	1
rs397507352	13	32339829	C	T	A1825V	0	0	0	1	0	0	0	1
rs587778126	13	32355013	C	T	A2387V	0	0	0	1	0	0	0	1
rs80358960	13	32355247	C	T	A2465V	0	0	0	1	0	0	0	1
rs876659434	13	32331022	C	T	A262V	0	0	0	1	0	0	0	1
rs748143090	13	32371038	C	T	A2857V	0	0	0	1	0	0	0	1
rs766195792	13	32332926	C	T	A483V	0	0	0	1	0	0	0	1
rs55821741	13	32333172	C	T	A565V	0	0	0	1	0	0	0	1
rs80358477	13	32333343	C	T	A622V	0	1	0	0	0	0	0	1
rs587782055	13	32333358	C	T	A627V	0	1	0	0	0	0	0	1
rs868546240	13	32336427	C	T	A691V	0	0	0	1	0	0	0	1
rs746291931	13	32336562	C	T	A736V	0	0	0	1	0	0	0	1
rs80358517	13	32336883	C	T	A843V	0	0	0	1	0	0	0	1
rs749258007	13	32337060	C	T	A902V	0	0	0	1	0	0	0	1
rs761934778	13	32337210	C	T	A952V	0	0	0	1	0	0	0	1
rs398122758	13	32337336	C	T	A994V	0	0	0	1	0	0	0	1
rs80358564	13	32337566	C	T	H1071Y	0	0	1	0	0	0	0	1
rs80358576	13	32337656	C	T	H1101Y	0	0	1	0	0	0	0	1
rs863224588	13	32338349	C	T	H1332Y	0	0	0	1	0	0	0	1
rs1064793495	13	32338754	C	T	H1467Y	0	0	0	1	0	0	0	1
rs80358745	13	32339546	C	T	H1731Y	0	0	1	0	0	0	0	1
rs34309943	13	32340575	C	T	H2074Y	0	1	0	0	0	0	0	1
rs587781476	13	32340794	C	T	H2147Y	0	1	0	0	0	0	0	1
rs80358885	13	32340887	C	T	H2178Y	0	1	0	0	0	0	0	1
rs1420447960	13	32380055	C	T	H3056Y	0	1	0	0	0	0	0	1
rs80358446	13	32333105	C	T	H543Y	0	0	1	0	0	0	0	1
rs773591333	13	32339165	C	T	L1604F	0	0	0	1	0	0	0	1
rs1408726129	13	32339414	C	T	L1687F	0	0	0	1	0	0	0	1
rs398122542	13	32340248	C	T	L1965F	0	0	0	1	0	0	0	1
rs1413065373	13	32332676	C	T	L400F	0	0	0	1	0	0	0	1
rs587776460	13	32332922	C	T	L482F	0	0	0	1	0	0	0	1
rs876660365	13	32337618	C	T	P1088L	0	0	1	0	0	0	0	1
rs587782581	13	32338125	C	T	P1257L	0	0	1	0	0	0	0	1
rs760773155	13	32338716	C	T	P1454L	0	0	0	1	0	0	0	1
rs1479815532	13	32339189	C	T	P1612S	0	0	0	1	0	0	0	1
rs786203835	13	32339676	C	T	P1774L	0	0	0	1	0	0	0	1
rs80358768	13	32339810	C	T	P1819S	0	0	0	1	0	0	0	1
rs80358812	13	32340194	C	T	P1947S	0	0	0	1	0	0	0	1
rs587782740	13	32340461	C	T	P2036S	0	0	0	1	0	0	0	1
rs56019712	13	32340915	C	T	P2187L	0	0	0	1	0	0	0	1
rs868216475	13	32340914	C	T	P2187S	0	0	0	1	0	0	0	1
rs80358907	13	32341181	C	T	P2276S	0	0	0	1	0	0	0	1
rs80358964	13	32355282	C	T	P2477S	0	0	0	1	0	0	0	1
rs80359122	13	32376684	C	T	P2883S	0	0	0	1	0	0	0	1
rs786204070	13	32380049	C	T	P3054S	0	0	0	1	0	0	0	1
rs80358408	13	32332601	C	T	P375S	0	0	0	1	0	0	0	1
rs876659628	13	32332713	C	T	P412L	0	0	0	1	0	0	0	1
rs1216148236	13	32319146	C	T	P46L	0	1	0	0	0	0	0	1
rs758025325	13	32333057	C	T	P527S	0	0	0	1	0	0	0	1
rs1163156807	13	32333360	C	T	P628S	0	0	0	1	0	0	0	1
rs28897712	13	32336319	C	T	P655L	0	0	0	1	0	0	0	1
rs1209541961	13	32336465	C	T	P704S	0	0	0	1	0	0	0	1
rs867089743	13	32336516	C	T	P721S	0	0	0	1	0	0	0	1
rs397507293	13	32337113	C	T	P920S	0	0	0	1	0	0	0	1
rs1222542759	13	32339331	C	T	S1659F	0	0	1	0	0	0	0	1
rs80358748	13	32339604	C	T	S1750F	0	0	1	0	0	0	0	1
rs149330893	13	32340783	C	T	S2143L	0	0	1	0	0	0	0	1
rs397507867	13	32340912	C	T	S2186L	0	0	0	0	1	0	0	1
rs778694116	13	32398469	C	T	S3319F	0	0	1	0	0	0	0	1
rs876660796	13	32332545	C	T	S356F	0	1	0	0	0	0	0	1
rs80358474	13	32333310	C	T	S611L	0	0	0	0	0	1	0	1
rs397507308	13	32337777	C	T	T1141I	0	0	0	1	0	0	0	1
rs80358634	13	32338260	C	T	T1302I	0	0	0	1	0	0	0	1
rs878853578	13	32338431	C	T	T1359I	0	0	0	1	0	0	0	1
rs70953664	13	32338596	C	T	T1414M	0	0	0	1	0	0	0	1
rs746821851	13	32339100	C	T	T1582I	0	1	0	0	0	0	0	1
rs587781581	13	32339241	C	T	T1629I	0	0	0	1	0	0	0	1
rs397507795	13	32340015	C	T	T1887M	0	0	0	1	0	0	0	1
rs776937022	13	32340729	C	T	T2125I	0	0	0	1	0	0	0	1
rs786202614	13	32355049	C	T	T2399I	0	0	0	1	0	0	0	1
rs994319321	13	32363340	C	T	T2713I	0	0	0	1	0	0	0	1
rs431825376	13	32396980	C	T	T3195I	0	0	0	1	0	0	0	1
rs876660828	13	32332770	C	T	T431I	0	0	0	1	0	0	0	1
rs397507271	13	32333052	C	T	T525I	0	0	0	1	0	0	0	1
rs80358448	13	32333109	C	T	T544I	0	1	0	0	0	0	0	1
rs876660137	13	32336463	C	T	T703I	0	0	0	1	0	0	0	1
rs55824746	13	32336658	C	T	T768I	0	0	0	0	0	1	0	1
rs1239876081	13	32336676	C	T	T774I	0	0	0	1	0	0	0	1
rs276174828	13	32337090	C	T	T912I	0	0	0	1	0	0	0	1
rs372433502	13	32337563	G	A	A1070T	0	0	0	1	0	0	0	1
rs878853570	13	32337839	G	A	A1162T	0	0	0	1	0	0	0	1
rs1226138707	13	32338112	G	A	A1253T	0	0	0	1	0	0	0	1
rs80358621	13	32325138	G	A	A127T	0	0	0	1	0	0	0	1
rs1266192644	13	32339069	G	A	A1572T	0	0	0	1	0	0	0	1
rs786202248	13	32339297	G	A	A1648T	0	0	0	1	0	0	0	1
rs863224594	13	32339882	G	A	A1843T	0	0	0	1	0	0	0	1
rs587782644	13	32340026	G	A	A1891T	0	0	0	1	0	0	0	1
rs746070652	13	32340908	G	A	A2185T	0	0	0	1	0	0	0	1
rs398122563	13	32329490	G	A	A227T	0	0	0	1	0	0	0	1
rs55854959	13	32330979	G	A	A248T	0	0	0	1	0	0	0	1
rs786203133	13	32356565	G	A	A2525T	0	0	0	1	0	0	0	1
rs1060502439	13	32363333	G	A	A2711T	0	0	0	1	0	0	0	1
rs587782874	13	32370543	G	A	A2825T	0	0	0	1	0	0	0	1
rs80359126	13	32376702	G	A	A2889T	0	0	0	1	0	0	0	1
rs587782100	13	32332484	G	A	A336T	0	0	0	1	0	0	0	1
rs1057521734	13	32398708	G	A	A3399T	0	0	0	1	0	0	0	1
rs761411987	13	32333195	G	A	A573T	0	0	0	1	0	0	0	1
rs868112748	13	32333372	G	A	A632T	0	0	0	1	0	0	0	1
rs431825290	13	32336426	G	A	A691T	0	0	0	1	0	0	0	1
rs1453451895	13	32336471	G	A	A706T	0	0	0	1	0	0	0	1
rs730881513	13	32336561	G	A	A736T	0	0	0	1	0	0	0	1
rs768556548	13	32337167	G	A	A938T	0	0	0	1	0	0	0	1
rs587782223	13	32337335	G	A	A994T	0	0	0	1	0	0	0	1
rs876660070	13	32338805	G	A	D1484N	0	0	0	1	0	0	0	1
rs80358687	13	32338892	G	A	D1513N	0	0	0	1	0	0	0	1
rs80358744	13	32339537	G	A	D1728N	0	0	0	1	0	0	0	1
rs749590229	13	32341067	G	A	D2238N	0	0	0	1	0	0	0	1
rs1064794170	13	32333300	G	A	D608N	0	0	0	1	0	0	0	1
rs80358487	13	32336474	G	A	D707N	0	0	0	0	0	1	0	1
rs80358644	13	32338313	G	A	E1320K	0	0	0	1	0	0	0	1
rs886038111	13	32339291	G	A	E1646K	0	0	0	1	0	0	0	1
rs786202543	13	32339555	G	A	E1734K	0	0	0	1	0	0	0	1
rs397507793	13	32339981	G	A	E1876K	0	0	0	1	0	0	0	1
rs55996097	13	32339990	G	A	E1879K	0	0	0	1	0	0	0	1
rs1182648647	13	32379857	G	A	E3021K	0	0	0	1	0	0	0	1
rs276174804	13	32398717	G	A	E3402K	0	0	0	1	0	0	0	1
rs80358416	13	32332703	G	A	E409K	0	0	0	0	1	0	0	1
rs778142232	13	32332844	G	A	E456K	0	0	0	1	0	0	0	1
rs138734772	13	32333072	G	A	E532K	0	0	0	1	0	0	0	1
rs276174810	13	32333078	G	A	E534K	0	0	0	1	0	0	0	1
rs397507281	13	32336507	G	A	E718K	0	0	0	1	0	0	0	1
rs1420648751	13	32339666	G	A	G1771S	0	0	0	1	0	0	0	1
rs1244030146	13	32355051	G	A	G2400S	0	0	0	1	0	0	0	1
rs398122585	13	32356577	G	A	G2529S	0	0	0	1	0	0	0	1
rs764208320	13	32398276	G	A	G3255R	0	0	0	1	0	0	0	1
rs587782137	13	32316471	G	A	G4E	0	0	0	0	0	1	0	1
rs1233016217	13	32332976	G	A	G500S	0	0	0	1	0	0	0	1
rs431825297	13	32336753	G	A	G800S	0	0	0	1	0	0	0	1
rs80358574	13	32337625	G	A	M1090I	0	0	0	1	0	0	0	1
rs876660471	13	32337802	G	A	M1149I	0	0	0	1	0	0	0	1
rs876659209	13	32338255	G	A	M1300I	0	0	0	1	0	0	0	1
rs879255301	13	32338780	G	A	M1475I	0	0	0	1	0	0	0	1
rs759138390	13	32340163	G	A	M1936I	0	0	0	1	0	0	0	1
rs1163477792	13	32340721	G	A	M2122I	0	0	0	1	0	0	0	1
rs80358643	13	32338299	G	A	R1315K	0	0	0	1	0	0	0	1
rs80358685	13	32338890	G	A	R1512H	0	0	0	1	0	0	0	1
rs1060502472	13	32339064	G	A	R1570K	0	0	0	1	0	0	0	1
rs375304428	13	32339385	G	A	R1677K	0	0	0	1	0	0	0	1
rs753721331	13	32339436	G	A	R1694K	0	0	0	1	0	0	0	1
rs431825337	13	32340435	G	A	R2027K	0	0	0	1	0	0	0	1
rs80358868	13	32340651	G	A	R2099K	0	0	0	1	0	0	0	1
rs398122578	13	32355106	G	A	R2418K	0	0	0	1	0	0	0	1
rs80359128	13	32376724	G	A	R2896H	0	0	0	1	0	0	0	1
rs1287932047	13	32379861	G	A	R3022K	0	0	0	1	0	0	0	1
rs730881575	13	32398223	G	A	R3237K	0	0	0	1	0	0	0	1
rs786202940	13	32332881	G	A	R468K	0	0	0	1	0	0	0	1
rs587781915	13	32336877	G	A	R841K	0	0	0	1	0	0	0	1
rs1060502457	13	32336895	G	A	R847K	0	0	0	1	0	0	0	1
rs543748012	13	32337606	G	A	S1084N	0	0	0	1	0	0	0	1
rs773184912	13	32325094	G	A	S112N	0	0	0	1	0	0	0	1
rs397507674	13	32337891	G	A	S1179N	0	0	0	0	0	1	0	1
rs762488820	13	32338131	G	A	S1259N	0	0	0	1	0	0	0	1
rs1270552356	13	32338380	G	A	S1342N	0	0	0	1	0	0	0	1
rs397507341	13	32339205	G	A	S1617N	0	0	0	1	0	0	0	1
rs41293493	13	32339400	G	A	S1682N	0	0	0	0	0	1	0	1
rs587782714	13	32339583	G	A	S1743N	0	0	0	1	0	0	0	1
rs80358782	13	32339967	G	A	S1871N	0	0	0	1	0	0	0	1
rs80358820	13	32340237	G	A	S1961N	0	0	0	1	0	0	0	1
rs587780657	13	32340531	G	A	S2059N	0	0	0	0	0	1	0	1
rs1064793498	13	32330929	G	A	S231N	0	0	0	1	0	0	0	1
rs80358967	13	32356440	G	A	S2483N	0	0	0	0	0	1	0	1
rs587782422	13	32332830	G	A	S451N	0	0	0	1	0	0	0	1
rs994146384	13	32333091	G	A	S538N	0	1	0	0	0	0	0	1
rs80358560	13	32337497	G	A	V1048I	0	0	0	1	0	0	0	1
rs431825304	13	32337581	G	A	V1076I	0	0	0	1	0	0	0	1
rs1359975493	13	32325084	G	A	V109I	0	0	0	1	0	0	0	1
rs1274123258	13	32337785	G	A	V1144M	0	0	0	1	0	0	0	1
rs80358596	13	32337851	G	A	V1166I	0	0	0	1	0	0	0	1
rs80358602	13	32337881	G	A	V1176I	0	0	0	1	0	0	0	1
rs587782420	13	32337911	G	A	V1186I	0	0	0	1	0	0	0	1
rs1064794685	13	32338067	G	A	V1238M	0	0	0	1	0	0	0	1
rs876658938	13	32338163	G	A	V1270I	0	0	0	1	0	0	0	1
rs754974533	13	32338202	G	A	V1283I	0	0	0	1	0	0	0	1
rs80358636	13	32338271	G	A	V1306I	0	0	0	1	0	0	0	1
rs80358653	13	32338394	G	A	V1347I	0	0	0	1	0	0	0	1
rs80358661	13	32338529	G	A	V1392I	0	0	0	1	0	0	0	1
rs786202874	13	32338667	G	A	V1438I	0	0	0	1	0	0	0	1
rs1064795076	13	32338694	G	A	V1447I	0	0	0	1	0	0	0	1
rs876661259	13	32326105	G	A	V144I	0	0	0	1	0	0	0	1
rs397507335	13	32326126	G	A	V151I	0	0	0	1	0	0	0	1
rs786201175	13	32339168	G	A	V1605I	0	0	0	1	0	0	0	1
rs147022828	13	32326244	G	A	V160I	0	0	0	1	0	0	0	1
rs80358716	13	32339270	G	A	V1639I	0	0	0	1	0	0	0	1
rs879254182	13	32339282	G	A	V1643I	0	0	0	1	0	0	0	1
rs587782067	13	32339486	G	A	V1711I	0	0	0	1	0	0	0	1
rs1201262482	13	32326277	G	A	V171M	0	0	0	1	0	0	0	1
rs876659138	13	32339621	G	A	V1756I	0	0	0	1	0	0	0	1
rs431825329	13	32339690	G	A	V1779I	0	0	0	1	0	0	0	1
rs776630512	13	32339870	G	A	V1839I	0	0	0	1	0	0	0	1
rs80358813	13	32340203	G	A	V1950I	0	0	0	1	0	0	0	1
rs1276100299	13	32340500	G	A	V2049M	0	0	0	1	0	0	0	1
rs80358854	13	32340503	G	A	V2050I	0	0	0	1	0	0	0	1
rs80358869	13	32340659	G	A	V2102I	0	0	0	1	0	0	0	1
rs79456940	13	32340680	G	A	V2109I	0	0	0	1	0	0	0	1
rs80358888	13	32340923	G	A	V2190I	0	0	0	1	0	0	0	1
rs80358889	13	32340968	G	A	V2205M	0	0	0	1	0	0	0	1
rs749594501	13	32330922	G	A	V229M	0	0	0	1	0	0	0	1
rs1393996926	13	32355120	G	A	V2423I	0	0	0	1	0	0	0	1
rs730881553	13	32355255	G	A	V2468I	0	0	0	1	0	0	0	1
rs587782191	13	32356499	G	A	V2503I	0	0	0	0	0	1	0	1
rs587776471	13	32363270	G	A	V2690I	0	0	0	1	0	0	0	1
rs1485423178	13	32332304	G	A	V276I	0	0	0	1	0	0	0	1
rs878853616	13	32332376	G	A	V300I	0	0	0	1	0	0	0	1
rs587776476	13	32394865	G	A	V3145M	0	0	0	1	0	0	0	1
rs80359240	13	32398231	G	A	V3240I	0	0	0	1	0	0	0	1
rs11571831	13	32398243	G	A	V3244I	0	0	0	1	0	0	0	1
rs587782713	13	32333192	G	A	V572I	0	0	0	1	0	0	0	1
rs80358493	13	32336576	G	A	V741I	0	0	0	1	0	0	0	1
rs587779360	13	32336687	G	A	V778I	0	0	0	1	0	0	0	1
rs756411508	13	32336816	G	A	V821I	0	0	0	1	0	0	0	1
rs397507287	13	32336846	G	A	V831I	0	0	0	1	0	0	0	1
rs587782582	13	32336978	G	A	V875I	0	0	0	1	0	0	0	1
rs28897715	13	32337035	G	A	V894I	0	0	0	1	0	0	0	1
rs863224586	13	32337176	G	A	V941M	0	0	0	1	0	0	0	1
rs775903570	13	32337203	G	A	V950I	0	0	0	1	0	0	0	1
rs587782182	13	32339357	G	C	A1668P	0	0	0	0	1	0	0	1
rs745522949	13	32339828	G	C	A1825P	0	0	0	1	0	0	0	1
rs397507361	13	32340119	G	C	A1922P	0	0	0	0	1	0	0	1
rs730881552	13	32354979	G	C	A2376P	0	0	0	0	0	1	0	1
rs397507393	13	32331021	G	C	A262P	0	0	0	1	0	0	0	1
rs80358432	13	32332925	G	C	A483P	0	0	0	0	1	0	0	1
rs80358403	13	32332500	G	C	C341S	0	0	0	1	0	0	0	1
rs747803130	13	32337826	G	C	E1157D	0	0	0	1	0	0	0	1
rs80358695	13	32339003	G	C	E1550Q	0	0	0	1	0	0	0	1
rs431825322	13	32339068	G	C	E1571D	0	0	0	1	0	0	0	1
rs777845659	13	32332609	G	C	E377D	0	0	0	1	0	0	0	1
rs876658625	13	32332607	G	C	E377Q	0	0	0	1	0	0	0	1
rs747489126	13	32332846	G	C	E456D	0	0	0	1	0	0	0	1
rs1244303575	13	32336549	G	C	E732Q	0	0	0	1	0	0	0	1
rs587781406	13	32338464	G	C	G1370A	0	0	0	1	0	0	0	1
rs41293499	13	32340168	G	C	G1938A	0	0	0	1	0	0	0	1
rs80359220	13	32394890	G	C	G3153A	0	0	0	1	0	0	0	1
rs1002791506	13	32338297	G	C	K1314N	0	0	0	1	0	0	0	1
rs56324666	13	32340379	G	C	K2008N	0	0	0	0	1	0	0	1
rs45574331	13	32354870	G	C	K2339N	0	0	0	1	0	0	0	1
rs751890878	13	32332459	G	C	K327N	0	0	0	0	0	1	0	1
rs779967765	13	32339842	G	C	L1829F	0	0	0	1	0	0	0	1
rs759767392	13	32337097	G	C	L914F	0	0	0	1	0	0	0	1
rs864622427	13	32339220	G	C	R1622T	0	0	0	1	0	0	0	1
rs80358868	13	32340651	G	C	R2099T	0	0	0	1	0	0	0	1
rs80358976	13	32356491	G	C	R2500T	0	0	0	1	0	0	0	1
rs876661225	13	32339016	G	C	S1554T	0	1	0	0	0	0	0	1
rs41293493	13	32339400	G	C	S1682T	0	0	0	0	0	1	0	1
rs80358801	13	32340096	G	C	S1914T	0	0	0	1	0	0	0	1
rs587781714	13	32398520	G	C	S3336T	0	1	0	0	0	0	0	1
rs780798665	13	32332617	G	C	S380T	0	1	0	0	0	0	0	1
rs80358560	13	32337497	G	C	V1048L	0	0	0	1	0	0	0	1
rs80358653	13	32338394	G	C	V1347L	0	0	0	1	0	0	0	1
rs1271777808	13	32338844	G	C	V1497L	0	0	0	1	0	0	0	1
rs876659138	13	32339621	G	C	V1756L	0	0	0	1	0	0	0	1
rs876658443	13	32340890	G	C	V2179L	0	0	0	1	0	0	0	1
rs587776476	13	32394865	G	C	V3145L	0	0	0	1	0	0	0	1
rs876660239	13	32332640	G	C	V388L	0	0	0	1	0	0	0	1
rs587782454	13	32336879	G	C	V842L	0	0	0	1	0	0	0	1
rs372433502	13	32337563	G	T	A1070S	0	0	0	1	0	0	0	1
rs536218070	13	32333081	G	T	A535S	0	0	0	1	0	0	0	1
rs80358475	13	32333330	G	T	A618S	0	0	0	1	0	0	0	1
rs80358492	13	32336564	G	T	A737S	0	0	0	1	0	0	0	1
rs80358536	13	32337209	G	T	A952S	0	0	0	1	0	0	0	1
rs56249050	13	32339073	G	T	C1573F	0	0	0	0	1	0	0	1
rs80358403	13	32332500	G	T	C341F	0	0	0	0	1	0	0	1
rs777028631	13	32338117	G	T	E1254D	0	0	0	1	0	0	0	1
rs1256857369	13	32338480	G	T	E1375D	0	0	0	1	0	0	0	1
rs587782522	13	32339050	G	T	K1565N	0	0	0	1	0	0	0	1
rs777289792	13	32340247	G	T	K1964N	0	0	0	1	0	0	0	1
rs767686668	13	32336806	G	T	K817N	0	0	0	1	0	0	0	1
rs28897724	13	32338423	G	T	L1356F	0	0	0	1	0	0	0	1
rs587781826	13	32340046	G	T	L1897F	0	0	0	1	0	0	0	1
rs769971508	13	32337196	G	T	L947F	0	0	0	1	0	0	0	1
rs876658930	13	32339137	G	T	M1594I	0	0	0	1	0	0	0	1
rs387907575	13	32340316	G	T	Q1987H	0	0	0	1	0	0	0	1
rs80358486	13	32336452	G	T	Q699H	0	0	0	1	0	0	0	1
rs80358801	13	32340096	G	T	S1914I	0	0	1	0	0	0	0	1
rs879254182	13	32339282	G	T	V1643L	0	0	0	1	0	0	0	1
rs80358869	13	32340659	G	T	V2102L	0	0	0	1	0	0	0	1
rs11571831	13	32398243	G	T	V3244F	0	0	0	1	0	0	0	1
rs80358708	13	32339209	T	A	D1618E	0	1	0	0	0	0	0	1
rs531945351	13	32398293	T	A	D3260E	0	0	0	1	0	0	0	1
rs1135401908	13	32339964	T	A	F1870Y	0	0	0	1	0	0	0	1
rs763881800	13	32330974	T	A	F246Y	0	0	0	1	0	0	0	1
rs80358977	13	32356504	T	A	F2504L	0	0	0	1	0	0	0	1
rs768641298	13	32333025	T	A	F516Y	0	0	0	1	0	0	0	1
rs80358478	13	32333353	T	A	F625L	0	1	0	0	0	0	0	1
rs1054724641	13	32337764	T	A	L1137M	0	0	0	1	0	0	0	1
rs370026879	13	32340470	T	A	L2039I	0	0	0	1	0	0	0	1
rs1231977477	13	32340761	T	A	L2136I	0	0	0	1	0	0	0	1
rs878853597	13	32340766	T	A	N2137K	0	0	0	1	0	0	0	1
rs776558472	13	32333146	T	A	N556K	0	0	0	1	0	0	0	1
rs80358521	13	32336944	T	A	N863K	0	0	0	1	0	0	0	1
rs777895333	13	32338207	T	A	S1284R	0	0	0	0	1	0	0	1
rs778192937	13	32338757	T	A	S1468T	0	1	0	0	0	0	0	1
rs397507392	13	32357892	T	A	S2590T	0	0	0	0	0	1	0	1
rs876660044	13	32398702	T	A	S3397T	0	1	0	0	0	0	0	1
rs747592488	13	32332841	T	A	S455T	0	0	0	1	0	0	0	1
rs757856761	13	32332952	T	A	S492T	0	0	0	1	0	0	0	1
rs80358488	13	32336477	T	A	S708T	0	0	0	1	0	0	0	1
rs929941099	13	32340743	T	C	F2130L	0	0	0	1	0	0	0	1
rs1318579197	13	32332538	T	C	F354L	0	0	0	1	0	0	0	1
rs876659195	13	32333336	T	C	F620L	0	0	0	1	0	0	0	1
rs878853562	13	32336612	T	C	F753L	0	0	0	1	0	0	0	1
rs431825303	13	32337549	T	C	I1065T	0	0	0	1	0	0	0	1
rs398122765	13	32337762	T	C	I1136T	0	0	0	1	0	0	0	1
rs398122767	13	32337873	T	C	I1173T	0	0	0	1	0	0	0	1
rs80358625	13	32338179	T	C	I1275T	0	0	0	1	0	0	0	1
rs80358633	13	32338248	T	C	I1298T	0	0	0	1	0	0	0	1
rs754119978	13	32338608	T	C	I1418T	0	0	0	1	0	0	0	1
rs746472081	13	32338662	T	C	I1436T	0	0	0	1	0	0	0	1
rs80358714	13	32339253	T	C	I1633T	0	0	0	1	0	0	0	1
rs863224590	13	32339346	T	C	I1664T	0	0	0	1	0	0	0	1
rs80358743	13	32339526	T	C	I1724T	0	0	0	1	0	0	0	1
rs587782007	13	32339847	T	C	I1831T	0	0	0	1	0	0	0	1
rs149474191	13	32340063	T	C	I1903T	0	0	0	1	0	0	0	1
rs1060502377	13	32340240	T	C	I1962T	0	0	0	1	0	0	0	1
rs80358837	13	32340363	T	C	I2003T	0	0	0	1	0	0	0	1
rs876659473	13	32340474	T	C	I2040T	0	0	0	1	0	0	0	1
rs1060502462	13	32340885	T	C	I2177T	0	0	0	1	0	0	0	1
rs431825344	13	32340981	T	C	I2209T	0	0	0	1	0	0	0	1
rs11571707	13	32356461	T	C	I2490T	0	0	0	1	0	0	0	1
rs587782365	13	32363301	T	C	I2700T	0	0	0	1	0	0	0	1
rs80359060	13	32363355	T	C	I2718T	0	0	0	1	0	0	0	1
rs431825372	13	32379753	T	C	I2986T	0	0	0	1	0	0	0	1
rs1244221685	13	32396902	T	C	I3169T	0	0	0	1	0	0	0	1
rs879255305	13	32398289	T	C	I3259T	0	0	0	1	0	0	0	1
rs55955023	13	32332824	T	C	I449T	0	0	0	1	0	0	0	1
rs80358468	13	32333292	T	C	I605T	0	0	0	1	0	0	0	1
rs398122739	13	32336400	T	C	I682T	0	0	0	1	0	0	0	1
rs431825296	13	32336541	T	C	I729T	0	0	0	1	0	0	0	1
rs398122756	13	32337279	T	C	I975T	0	0	0	1	0	0	0	1
rs876659200	13	32337291	T	C	I979T	0	0	0	1	0	0	0	1
rs80358590	13	32337801	T	C	M1149T	0	0	0	1	0	0	0	1
rs1450325987	13	32325130	T	C	M124T	0	0	0	1	0	0	0	1
rs750581150	13	32338473	T	C	M1373T	0	0	0	1	0	0	0	1
rs431825351	13	32355031	T	C	M2393T	0	0	0	1	0	0	0	1
rs80359038	13	32363229	T	C	M2676T	0	0	0	1	0	0	0	1
rs1057517562	13	32332701	T	C	M408T	0	0	0	1	0	0	0	1
rs1465976941	13	32336736	T	C	M794T	0	0	0	1	0	0	0	1
rs1303254121	13	32336799	T	C	M815T	0	0	0	1	0	0	0	1
rs1060502490	13	32338736	T	C	S1461P	0	0	0	0	0	1	0	1
rs1160083526	13	32340476	T	C	S2041P	0	0	0	0	1	0	0	1
rs562893642	13	32340512	T	C	S2053P	0	0	1	0	0	0	0	1
rs587782624	13	32340779	T	C	S2142P	0	1	0	0	0	0	0	1
rs587782781	13	32363303	T	C	S2701P	0	0	0	0	0	1	0	1
rs1280487930	13	32370486	T	C	S2806P	0	0	0	0	0	1	0	1
rs755154038	13	32379494	T	C	S2978P	0	0	0	0	1	0	0	1
rs786205482	13	32398615	T	C	S3368P	0	0	1	0	0	0	0	1
rs759903048	13	32398678	T	C	S3389P	0	0	0	0	1	0	0	1
rs1478936460	13	32316473	T	C	S5P	0	1	0	0	0	0	0	1
rs867554960	13	32336891	T	C	S846P	0	0	0	0	0	1	0	1
rs1060502498	13	32337582	T	C	V1076A	0	0	0	1	0	0	0	1
rs762886975	13	32337852	T	C	V1166A	0	0	0	1	0	0	0	1
rs754382544	13	32337912	T	C	V1186A	0	0	0	1	0	0	0	1
rs80358628	13	32338203	T	C	V1283A	0	0	0	1	0	0	0	1
rs80358637	13	32338272	T	C	V1306A	0	0	0	1	0	0	0	1
rs730881503	13	32326127	T	C	V151A	0	0	0	1	0	0	0	1
rs28897731	13	32339283	T	C	V1643A	0	0	0	1	0	0	0	1
rs1060502436	13	32339343	T	C	V1663A	0	0	0	1	0	0	0	1
rs370252983	13	32339766	T	C	V1804A	0	0	0	1	0	0	0	1
rs786202572	13	32340852	T	C	V2166A	0	0	0	1	0	0	0	1
rs876659448	13	32340876	T	C	V2174A	0	0	0	1	0	0	0	1
rs1237865460	13	32355256	T	C	V2468A	0	0	0	1	0	0	0	1
rs373945846	13	32332638	T	C	V387A	0	0	0	1	0	0	0	1
rs1372510250	13	32332869	T	C	V464A	0	0	0	1	0	0	0	1
rs786202205	13	32332959	T	C	V494A	0	0	0	1	0	0	0	1
rs1039304689	13	32336397	T	C	V681A	0	0	0	1	0	0	0	1
rs1064793704	13	32336688	T	C	V778A	0	0	0	1	0	0	0	1
rs768143929	13	32336703	T	C	V783A	0	0	0	1	0	0	0	1
rs779520270	13	32336847	T	C	V831A	0	0	0	1	0	0	0	1
rs1288644511	13	32336901	T	C	V849A	0	0	0	1	0	0	0	1
rs879254067	13	32338325	T	C	Y1324H	0	0	0	1	0	0	0	1
rs75419644	13	32333276	T	C	Y600H	0	0	0	1	0	0	0	1
rs80358499	13	32336636	T	C	Y761H	0	0	0	1	0	0	0	1
rs1064794160	13	32340325	T	G	D1990E	0	0	0	0	0	1	0	1
rs771442178	13	32336308	T	G	D651E	0	0	0	0	0	1	0	1
rs786203478	13	32338471	T	G	F1372L	0	0	0	1	0	0	0	1
rs730881540	13	32340118	T	G	F1921L	0	0	0	1	0	0	0	1
rs80358891	13	32329474	T	G	F221L	0	0	0	1	0	0	0	1
rs900882465	13	32332972	T	G	F498L	0	0	0	1	0	0	0	1
rs781443201	13	32336644	T	G	H763Q	0	0	0	1	0	0	0	1
rs587780649	13	32337355	T	G	I1000M	0	0	0	1	0	0	0	1
rs765881070	13	32340142	T	G	I1929M	0	0	0	1	0	0	0	1
rs1057520563	13	32355200	T	G	I2449M	0	0	0	1	0	0	0	1
rs761996223	13	32340608	T	G	L2085V	0	0	0	1	0	0	0	1
rs1064793384	13	32337520	T	G	N1055K	0	0	0	1	0	0	0	1
rs879255303	13	32338186	T	G	N1277K	0	0	0	1	0	0	0	1
rs756797448	13	32339827	T	G	N1824K	0	0	0	1	0	0	0	1
rs876659793	13	32332585	T	G	N369K	0	0	0	1	0	0	0	1
rs760647691	13	32333029	T	G	N517K	0	0	0	1	0	0	0	1
rs276174845	13	32339017	T	G	S1554R	0	0	0	0	1	0	0	1
rs431825324	13	32339330	T	G	S1659A	0	0	0	1	0	0	0	1
rs1314863621	13	32340797	T	G	S2148A	0	0	0	1	0	0	0	1
rs918816907	13	32341001	T	G	S2216A	0	0	0	1	0	0	0	1
rs876658723	13	32336384	T	G	S677A	0	0	0	1	0	0	0	1
rs754090538	13	32339791	A	C	E1812D	1	0	0	1	0	0	0	2
rs80358618	13	32338122	A	C	H1256P	1	0	1	0	0	0	0	2
rs41293467	13	32326271	A	C	K169Q	1	0	0	0	0	1	0	2
rs587782583	13	32339979	A	C	K1875T	1	0	0	1	0	0	0	2
rs80359145	13	32379506	A	C	K2982Q	1	0	0	1	0	0	0	2
rs201561974	13	32380066	A	C	K3059N	1	0	0	0	0	1	0	2
rs200552004	13	32332780	A	C	K434N	1	0	0	0	0	1	0	2
rs587782737	13	32336744	A	C	K797Q	1	0	0	1	0	0	0	2
rs1229615442	13	32340145	A	C	L1930F	1	0	0	1	0	0	0	2
rs776196396	13	32337423	A	C	N1023T	1	0	0	0	0	1	0	2
rs80358646	13	32338320	A	C	N1322T	1	0	0	0	0	1	0	2
rs80358773	13	32339862	A	C	N1836T	1	0	0	1	0	0	0	2
rs276174927	13	32332441	A	C	Q321H	1	0	0	1	0	0	0	2
rs587782822	13	32339027	A	C	S1558R	1	0	0	0	1	0	0	2
rs80358645	13	32338317	A	G	D1321G	1	0	0	1	0	0	0	2
rs80358704	13	32339157	A	G	D1601G	1	0	0	1	0	0	0	2
rs766833528	13	32339067	A	G	E1571G	1	0	0	1	0	0	0	2
rs397507370	13	32340699	A	G	E2115G	1	0	0	1	0	0	0	2
rs56403624	13	32332863	A	G	E462G	1	0	0	1	0	0	0	2
rs80358618	13	32338122	A	G	H1256R	1	0	0	1	0	0	0	2
rs587782185	13	32338728	A	G	H1458R	1	0	0	1	0	0	0	2
rs398122538	13	32340005	A	G	I1884V	1	0	0	1	0	0	0	2
rs886037811	13	32340611	A	G	I2086V	1	0	0	1	0	0	0	2
rs397507620	13	32336542	A	G	I729M	1	0	0	1	0	0	0	2
rs780660669	13	32338776	A	G	K1474R	1	0	0	1	0	0	0	2
rs41293467	13	32326271	A	G	K169E	1	0	0	0	0	1	0	2
rs876660440	13	32316507	A	G	K16R	1	0	0	1	0	0	0	2
rs759780329	13	32332779	A	G	K434R	1	0	0	0	0	1	0	2
rs876658771	13	32333070	A	G	K531R	1	0	0	1	0	0	0	2
rs763035556	13	32336625	A	G	K757R	1	0	0	1	0	0	0	2
rs80358626	13	32338190	A	G	N1279D	1	0	0	1	0	0	0	2
rs1427687544	13	32338241	A	G	N1296D	1	0	0	0	0	1	0	2
rs587782753	13	32338986	A	G	N1544S	1	0	0	1	0	0	0	2
rs397507358	13	32339987	A	G	N1878D	1	0	0	1	0	0	0	2
rs398122731	13	32333240	A	G	N588D	1	0	0	0	0	1	0	2
rs373400041	13	32333241	A	G	N588S	1	0	0	0	0	1	0	2
rs539724529	13	32336511	A	G	N719S	1	0	0	1	0	0	0	2
rs765279896	13	32336756	A	G	N801D	1	0	0	1	0	0	0	2
rs80358566	13	32337573	A	G	Q1073R	1	0	0	1	0	0	0	2
rs1391223943	13	32339007	A	G	Q1551R	1	0	0	1	0	0	0	2
rs587778121	13	32339585	A	G	S1744G	1	0	0	1	0	0	0	2
rs876659256	13	32339960	A	G	S1869G	1	0	0	1	0	0	0	2
rs398122596	13	32363327	A	G	S2709G	1	0	0	1	0	0	0	2
rs80358728	13	32339390	A	G	T1679A	1	0	0	1	0	0	0	2
rs397507358	13	32339987	A	T	N1878Y	1	0	0	1	0	0	0	2
rs80358526	13	32337012	A	T	N886I	1	0	0	1	0	0	0	2
rs775030825	13	32337543	A	T	Q1063L	1	0	0	0	0	1	0	2
rs80358674	13	32326115	A	T	Q147L	1	0	1	0	0	0	0	2
rs876659547	13	32336946	A	T	Q864L	1	0	0	0	0	1	0	2
rs80358784	13	32339989	C	A	N1878K	1	0	0	1	0	0	0	2
rs868216475	13	32340914	C	A	P2187T	1	0	0	1	0	0	0	2
rs80358557	13	32337464	C	A	Q1037K	1	0	0	0	0	1	0	2
rs1378563251	13	32325151	C	A	S131Y	1	0	1	0	0	0	0	2
rs398122776	13	32338533	C	G	A1393G	1	0	0	1	0	0	0	2
rs786203320	13	32338587	C	G	A1411G	1	0	0	1	0	0	0	2
rs276174893	13	32330980	C	G	A248G	1	0	0	1	0	0	0	2
rs773905673	13	32336472	C	G	A706G	1	0	0	1	0	0	0	2
rs876660923	13	32336565	C	G	A737G	1	0	0	1	0	0	0	2
rs786201996	13	32376776	C	G	D2913E	1	0	0	0	0	1	0	2
rs1251545928	13	32338424	C	G	L1357V	1	0	0	1	0	0	0	2
rs374326934	13	32339986	C	G	N1877K	1	0	0	1	0	0	0	2
rs587781534	13	32338911	C	G	P1519R	1	0	0	1	0	0	0	2
rs876660366	13	32339120	C	G	P1589A	1	0	0	1	0	0	0	2
rs772385867	13	32396961	C	G	P3189A	1	0	0	1	0	0	0	2
rs80359058	13	32363342	C	G	Q2714E	1	0	0	0	0	1	0	2
rs781079248	13	32332697	C	G	Q407E	1	0	0	0	0	1	0	2
rs80358515	13	32319259	C	G	Q84E	1	0	0	0	0	1	0	2
rs80358538	13	32337236	C	G	Q961E	1	0	0	0	0	1	0	2
rs80359158	13	32332383	C	G	T302S	1	0	0	1	0	0	0	2
rs397507360	13	32340027	C	T	A1891V	1	0	0	1	0	0	0	2
rs80359193	13	32394695	C	T	A3088V	1	0	0	0	0	1	0	2
rs876661280	13	32333208	C	T	A577V	1	0	0	1	0	0	0	2
rs765892492	13	32339273	C	T	H1640Y	1	0	1	0	0	0	0	2
rs587778123	13	32340467	C	T	H2038Y	1	0	0	0	1	0	0	2
rs80358836	13	32316465	C	T	P2L	1	0	0	0	0	1	0	2
rs1300220263	13	32398471	C	T	P3320S	1	0	0	1	0	0	0	2
rs756971498	13	32319128	C	T	P40L	1	0	1	0	0	0	0	2
rs1415796889	13	32332850	C	T	P458S	1	0	0	1	0	0	0	2
rs55639415	13	32339553	C	T	S1733F	1	0	0	0	0	1	0	2
rs786202212	13	32337816	C	T	T1154I	1	0	0	1	0	0	0	2
rs730881528	13	32338284	C	T	T1310I	1	0	0	1	0	0	0	2
rs747993489	13	32338914	C	T	T1520I	1	0	0	1	0	0	0	2
rs1060502413	13	32340216	C	T	T1954I	1	0	0	1	0	0	0	2
rs80358866	13	32340645	C	T	T2097M	1	0	0	1	0	0	0	2
rs276174877	13	32341077	C	T	T2241I	1	0	0	0	0	1	0	2
rs878853600	13	32355061	C	T	T2403I	1	0	0	1	0	0	0	2
rs876659299	13	32336822	G	A	A823T	1	0	0	1	0	0	0	2
rs750055488	13	32338316	G	A	D1321N	1	0	0	1	0	0	0	2
rs80358842	13	32340413	G	A	E2020K	1	0	0	1	0	0	0	2
rs876660686	13	32339382	G	A	S1676N	1	0	0	0	0	1	0	2
rs754353971	13	32340540	G	A	S2062N	1	0	0	0	0	1	0	2
rs587781842	13	32346886	G	A	V2333I	1	0	0	1	0	0	0	2
rs80359168	13	32380007	G	A	V3040I	1	0	0	0	0	1	0	2
rs80358795	13	32340041	G	C	A1896P	1	0	0	0	1	0	0	2
rs876659758	13	32338676	G	C	E1441Q	1	0	0	1	0	0	0	2
rs1172322930	13	32325079	G	C	R107T	1	0	0	1	0	0	0	2
rs80358585	13	32337774	G	C	S1140T	1	0	0	1	0	0	0	2
rs876660602	13	32339376	G	C	S1674T	1	0	0	1	0	0	0	2
rs144784912	13	32340372	G	C	S2006T	1	0	0	1	0	0	0	2
rs587781763	13	32339342	G	C	V1663L	1	0	0	1	0	0	0	2
rs587782713	13	32333192	G	C	V572L	1	0	0	1	0	0	0	2
rs80358621	13	32325138	G	T	A127S	1	0	0	1	0	0	0	2
rs587782874	13	32370543	G	T	A2825S	1	0	0	1	0	0	0	2
rs80359126	13	32376702	G	T	A2889S	1	0	0	1	0	0	0	2
rs1432047332	13	32340700	G	T	E2115D	1	0	0	1	0	0	0	2
rs587776462	13	32336746	G	T	K797N	1	0	0	1	0	0	0	2
rs1064794947	13	32336857	G	T	L834F	1	0	0	1	0	0	0	2
rs375304428	13	32339385	G	T	R1677I	1	0	1	0	0	0	0	2
rs587782060	13	32339586	G	T	S1744I	1	0	1	0	0	0	0	2
rs11571659	13	32340767	G	T	V2138F	1	0	0	1	0	0	0	2
rs944308365	13	32379457	T	A	D2965E	1	0	0	0	0	1	0	2
rs864622169	13	32338469	T	A	F1372I	1	0	0	1	0	0	0	2
rs786202915	13	32341116	T	A	F2254Y	1	0	0	1	0	0	0	2
rs786203964	13	32329450	T	A	N213K	1	0	0	1	0	0	0	2
rs1064797382	13	32336512	T	A	N719K	1	0	0	1	0	0	0	2
rs397507821	13	32340373	T	A	S2006R	1	0	0	1	0	0	0	2
rs80358654	13	32338401	T	C	I1349T	1	0	0	1	0	0	0	2
rs755201475	13	32396944	T	C	I3183T	1	0	0	1	0	0	0	2
rs730881545	13	32340924	T	C	V2190A	1	0	0	1	0	0	0	2
rs1343940721	13	32338639	T	G	F1428L	1	0	0	1	0	0	0	2
rs587781488	13	32338495	T	G	I1380M	1	0	0	1	0	0	0	2
rs766067138	13	32340007	T	G	I1884M	1	0	0	1	0	0	0	2
rs80358481	13	32336267	T	G	L638V	1	0	0	1	0	0	0	2
rs11571657	13	32339995	T	G	N1880K	1	0	0	1	0	0	0	2
rs587781484	13	32330942	T	G	N235K	1	0	0	1	0	0	0	2
rs80358440	13	32333030	G	C	A518P	1	1	0	0	0	0	0	2
rs587781580	13	32339820	A	T	N1822I	1	1	0	0	0	0	0	2
rs929538989	13	32337277	C	G	D974E	1	1	0	0	0	0	0	2
rs80358820	13	32340237	G	T	S1961I	1	1	0	0	0	0	0	2
rs766833528	13	32339067	A	T	E1571V	1	1	0	0	0	0	0	2
rs55853199	13	32398715	C	T	T3401M	1	1	0	0	0	0	0	2
rs1200008651	13	32339556	A	T	E1734V	1	1	0	0	0	0	0	2
rs56087561	13	32339425	A	C	K1690N	1	1	0	0	0	0	0	2
rs771425987	13	32339268	A	C	K1638T	1	1	0	0	0	0	0	2
rs398122616	13	32396960	T	A	D3188E	1	1	0	0	0	0	0	2
rs80359158	13	32332383	C	A	T302N	1	1	0	0	0	0	0	2
rs397507363	13	32340375	C	A	T2007N	1	1	0	0	0	0	0	2
rs55939572	13	32332434	A	C	N319T	1	1	0	0	0	0	0	2
rs1064793068	13	32340903	A	T	E2183V	1	1	0	0	0	0	0	2
rs765575482	13	32340822	C	T	S2156F	1	1	0	0	0	0	0	2
rs587779359	13	32333352	T	G	F625C	1	1	0	0	0	0	0	2
rs1327059542	13	32338806	A	C	D1484A	0	1	0	1	0	0	0	2
rs757577670	13	32336538	A	C	D728A	0	0	1	1	0	0	0	2
rs80358703	13	32339134	A	C	E1593D	0	0	0	1	0	1	0	2
rs747773227	13	32340439	A	C	E2028D	0	1	0	1	0	0	0	2
rs1064793571	13	32340724	A	C	E2123D	0	1	0	1	0	0	0	2
rs1000705954	13	32354918	A	C	E2355D	0	0	0	1	0	1	0	2
rs1064793835	13	32398644	A	C	E3377D	0	0	0	1	0	1	0	2
rs779648876	13	32319156	A	C	E49D	0	0	0	1	0	1	0	2
rs1060502427	13	32336508	A	C	E718A	0	0	1	1	0	0	0	2
rs786204184	13	32396950	A	C	H3185P	0	0	1	0	1	0	0	2
rs786202983	13	32338901	A	C	I1516L	0	0	0	1	0	1	0	2
rs80358918	13	32346832	A	C	I2315L	0	0	0	1	0	1	0	2
rs690016539	13	32337635	A	C	K1094Q	0	1	0	1	0	0	0	2
rs747903103	13	32337770	A	C	K1139Q	0	0	0	1	0	1	0	2
rs80358954	13	32355154	A	C	K2434T	0	1	0	1	0	0	0	2
rs80358963	13	32355268	A	C	K2472T	0	0	0	1	0	1	0	2
rs876659263	13	32398457	A	C	K3315T	0	1	0	1	0	0	0	2
rs1060502486	13	32332471	A	C	K331N	0	1	0	1	0	0	0	2
rs587782140	13	32332524	A	C	K349T	0	1	0	1	0	0	0	2
rs876658771	13	32333070	A	C	K531T	0	1	0	1	0	0	0	2
rs976841328	13	32339215	A	C	L1620F	0	0	0	1	0	1	0	2
rs80358553	13	32337440	A	C	M1029L	0	0	0	1	0	1	0	2
rs786204062	13	32338559	A	C	N1402H	0	1	0	1	0	0	0	2
rs1308950771	13	32339705	A	C	N1784H	0	1	0	1	0	0	0	2
rs80358853	13	32340498	A	C	N2048T	0	0	0	1	0	1	0	2
rs1434431480	13	32340755	A	C	N2134H	0	1	0	1	0	0	0	2
rs80358905	13	32341151	A	C	N2266H	0	1	0	1	0	0	0	2
rs1278943365	13	32355225	A	C	N2458H	0	1	0	1	0	0	0	2
rs397508008	13	32379351	A	C	N2930T	0	1	0	0	0	1	0	2
rs80359256	13	32398465	A	C	N3318H	0	1	0	1	0	0	0	2
rs144848	13	32332592	A	C	N372H	0	1	0	1	0	0	0	2
rs777641881	13	32333321	A	C	N615H	0	1	0	1	0	0	0	2
rs1205280922	13	32337011	A	C	N886H	0	1	0	1	0	0	0	2
rs56283738	13	32338882	A	C	Q1509H	0	1	0	1	0	0	0	2
rs878853587	13	32339458	A	C	Q1701H	0	0	0	1	1	0	0	2
rs80358852	13	32340480	A	C	Q2042P	0	0	0	1	1	0	0	2
rs786202429	13	32356582	A	C	Q2530H	0	1	0	1	0	0	0	2
rs1240729646	13	32336301	A	C	Q649P	0	1	0	0	0	1	0	2
rs56289428	13	32336616	A	C	Q754P	0	0	0	1	1	0	0	2
rs375790538	13	32330972	A	C	R245S	0	0	1	1	0	0	0	2
rs80358614	13	32338097	A	C	S1248R	0	1	0	0	0	1	0	2
rs876658960	13	32398609	A	C	S3366R	0	0	0	1	0	1	0	2
rs80358639	13	32338293	A	C	Y1313S	0	0	1	1	0	0	0	2
rs1341974678	13	32339607	A	C	Y1751S	0	0	1	1	0	0	0	2
rs1064793624	13	32337516	A	G	D1054G	0	0	0	1	0	1	0	2
rs745425169	13	32338782	A	G	D1476G	0	0	1	1	0	0	0	2
rs80358756	13	32339697	A	G	D1781G	0	1	0	1	0	0	0	2
rs876658786	13	32340048	A	G	D1898G	0	0	0	1	1	0	0	2
rs1060502461	13	32340051	A	G	D1899G	0	0	0	1	1	0	0	2
rs431825336	13	32340201	A	G	D1949G	0	0	1	1	0	0	0	2
rs1064793332	13	32330992	A	G	D252G	0	0	1	1	0	0	0	2
rs1346717702	13	32333055	A	G	D526G	0	0	1	1	0	0	0	2
rs747387987	13	32336307	A	G	D651G	0	0	0	1	0	1	0	2
rs780489283	13	32336685	A	G	D777G	0	0	1	1	0	0	0	2
rs55972907	13	32337192	A	G	D946G	0	0	1	1	0	0	0	2
rs1250767974	13	32337294	A	G	D980G	0	0	1	1	0	0	0	2
rs80358588	13	32337792	A	G	E1146G	0	0	1	1	0	0	0	2
rs1060502399	13	32338599	A	G	E1415G	0	0	1	1	0	0	0	2
rs777981245	13	32339349	A	G	E1665G	0	0	1	1	0	0	0	2
rs780049848	13	32340786	A	G	E2144G	0	0	1	1	0	0	0	2
rs876660314	13	32340879	A	G	E2175G	0	1	0	1	0	0	0	2
rs1358596567	13	32355277	A	G	E2475G	0	1	0	1	0	0	0	2
rs768169574	13	32332752	A	G	E425G	0	0	0	1	0	1	0	2
rs1213277350	13	32332902	A	G	E475G	0	1	0	1	0	0	0	2
rs587782015	13	32337015	A	G	E887G	0	1	0	1	0	0	0	2
rs80358565	13	32337567	A	G	H1071R	0	0	1	1	0	0	0	2
rs80358570	13	32337609	A	G	H1085R	0	0	1	1	0	0	0	2
rs398122768	13	32338023	A	G	H1223R	0	0	0	1	1	0	0	2
rs1060502441	13	32338440	A	G	H1362R	0	0	1	1	0	0	0	2
rs397507336	13	32338929	A	G	H1525R	0	0	1	1	0	0	0	2
rs765259371	13	32339547	A	G	H1731R	0	1	0	1	0	0	0	2
rs80358796	13	32340069	A	G	H1905R	0	0	1	1	0	0	0	2
rs431825334	13	32340102	A	G	H1916R	0	0	1	1	0	0	0	2
rs761789188	13	32329479	A	G	H223R	0	0	1	1	0	0	0	2
rs781092796	13	32355097	A	G	H2415R	0	0	1	1	0	0	0	2
rs80358443	13	32333046	A	G	H523R	0	0	1	1	0	0	0	2
rs876659687	13	32337425	A	G	I1024V	0	0	0	1	0	1	0	2
rs1064793378	13	32338609	A	G	I1418M	0	1	0	1	0	0	0	2
rs397507354	13	32339930	A	G	I1859V	0	0	0	1	0	1	0	2
rs587781539	13	32340475	A	G	I2040M	0	1	0	1	0	0	0	2
rs755523944	13	32340557	A	G	I2068V	0	0	0	1	0	1	0	2
rs80358918	13	32346832	A	G	I2315V	0	0	0	1	0	1	0	2
rs1169190081	13	32330976	A	G	I247V	0	1	0	1	0	0	0	2
rs1057520611	13	32356462	A	G	I2490M	0	1	0	1	0	0	0	2
rs1483187442	13	32362599	A	G	I2628V	0	0	0	1	0	1	0	2
rs1060502493	13	32363279	A	G	I2693V	0	0	0	1	0	1	0	2
rs1360333646	13	32370402	A	G	I2778V	0	0	0	1	0	1	0	2
rs80359034	13	32319088	A	G	I27V	0	0	0	1	0	1	0	2
rs80359103	13	32370986	A	G	I2840V	0	1	0	1	0	0	0	2
rs1197950867	13	32379482	A	G	I2974V	0	0	0	1	0	1	0	2
rs879255470	13	32379869	A	G	I3025V	0	1	0	1	0	0	0	2
rs1057521760	13	32380019	A	G	I3044V	0	0	0	1	0	1	0	2
rs80359203	13	32394739	A	G	I3103V	0	0	0	1	0	1	0	2
rs768567428	13	32398528	A	G	I3339V	0	0	0	1	0	1	0	2
rs397507270	13	32332991	A	G	I505V	0	1	0	1	0	0	0	2
rs786203548	13	32333249	A	G	I591V	0	0	0	1	0	1	0	2
rs431825287	13	32333258	A	G	I594V	0	0	0	1	0	1	0	2
rs546036225	13	32336963	A	G	I870V	0	0	0	1	0	1	0	2
rs397507297	13	32337292	A	G	I979M	0	1	0	1	0	0	0	2
rs431825302	13	32337528	A	G	K1058R	0	1	0	1	0	0	0	2
rs776099423	13	32337537	A	G	K1061R	0	1	0	1	0	0	0	2
rs747903103	13	32337770	A	G	K1139E	0	0	0	1	0	1	0	2
rs876658305	13	32325126	A	G	K123E	0	0	1	0	0	1	0	2
rs80358629	13	32338211	A	G	K1286E	0	1	0	1	0	0	0	2
rs786201943	13	32338220	A	G	K1289E	0	0	1	1	0	0	0	2
rs483353114	13	32338382	A	G	K1343E	0	1	0	1	0	0	0	2
rs864622126	13	32338475	A	G	K1374E	0	1	0	1	0	0	0	2
rs876658735	13	32338571	A	G	K1406E	0	1	0	1	0	0	0	2
rs876661198	13	32338592	A	G	K1413E	0	0	1	1	0	0	0	2
rs80358668	13	32338673	A	G	K1440E	0	0	0	1	1	0	0	2
rs80358669	13	32338674	A	G	K1440R	0	1	0	1	0	0	0	2
rs757821270	13	32338769	A	G	K1472E	0	0	1	1	0	0	0	2
rs587781468	13	32338905	A	G	K1517R	0	1	0	1	0	0	0	2
rs1060502418	13	32338952	A	G	K1533E	0	0	1	0	1	0	0	2
rs80358699	13	32339058	A	G	K1568R	0	1	0	1	0	0	0	2
rs80358730	13	32326272	A	G	K169R	0	0	0	1	0	1	0	2
rs730881537	13	32339684	A	G	K1777E	0	1	0	1	0	0	0	2
rs587782240	13	32339720	A	G	K1789E	0	0	1	1	0	0	0	2
rs80358791	13	32340018	A	G	K1888R	0	0	1	1	0	0	0	2
rs80358840	13	32340392	A	G	K2013E	0	0	1	1	0	0	0	2
rs1394782776	13	32340666	A	G	K2104R	0	0	0	1	0	1	0	2
rs398122561	13	32340941	A	G	K2196E	0	0	1	1	0	0	0	2
rs876658476	13	32344630	A	G	K2305R	0	1	0	1	0	0	0	2
rs553984945	13	32355229	A	G	K2459R	0	1	0	1	0	0	0	2
rs1060502383	13	32355267	A	G	K2472E	0	0	0	1	0	1	0	2
rs755946384	13	32363388	A	G	K2729R	0	0	0	1	0	1	0	2
rs1306507591	13	32332317	A	G	K280R	0	1	0	1	0	0	0	2
rs768560674	13	32371026	A	G	K2853R	0	0	0	1	0	1	0	2
rs759784406	13	32371071	A	G	K2868R	0	0	0	1	0	1	0	2
rs876660155	13	32379411	A	G	K2950R	0	0	0	1	0	1	0	2
rs1299944188	13	32379891	A	G	K3032R	0	1	0	0	0	1	0	2
rs876658793	13	32380137	A	G	K3083R	0	0	0	1	0	1	0	2
rs80359239	13	32398219	A	G	K3236E	0	1	1	0	0	0	0	2
rs55847618	13	32398283	A	G	K3257R	0	1	0	1	0	0	0	2
rs876659263	13	32398457	A	G	K3315R	0	1	0	1	0	0	0	2
rs80358411	13	32332631	A	G	K385E	0	1	0	1	0	0	0	2
rs431825294	13	32336528	A	G	K725E	0	0	1	1	0	0	0	2
rs886040419	13	32336624	A	G	K757E	0	0	1	1	0	0	0	2
rs747578057	13	32336867	A	G	K838E	0	1	0	1	0	0	0	2
rs876659257	13	32336940	A	G	K862R	0	1	0	1	0	0	0	2
rs1370517493	13	32337330	A	G	K992R	0	1	0	1	0	0	0	2
rs80358553	13	32337440	A	G	M1029V	0	0	0	1	0	1	0	2
rs1064793329	13	32356469	A	G	M2493V	0	0	0	1	0	1	0	2
rs767209209	13	32363525	A	G	M2775V	0	0	0	1	0	1	0	2
rs760663398	13	32370959	A	G	M2831V	0	0	0	1	0	1	0	2
rs730881574	13	32398213	A	G	M3234V	0	0	0	1	0	1	0	2
rs80358630	13	32338218	A	G	N1288S	0	0	0	1	0	1	0	2
rs1057520792	13	32338344	A	G	N1330S	0	0	0	1	0	1	0	2
rs587782661	13	32338686	A	G	N1444S	0	0	0	1	0	1	0	2
rs1305070555	13	32338743	A	G	N1463S	0	0	0	1	0	1	0	2
rs80358675	13	32338772	A	G	N1473D	0	1	0	1	0	0	0	2
rs747191784	13	32339351	A	G	N1666D	0	0	0	1	0	1	0	2
rs1344419982	13	32339352	A	G	N1666S	0	0	0	1	0	1	0	2
rs1443102794	13	32339516	A	G	N1721D	0	0	0	1	0	1	0	2
rs431825328	13	32339594	A	G	N1747D	0	0	0	1	0	1	0	2
rs80358765	13	32339769	A	G	N1805S	0	0	0	1	0	1	0	2
rs767110818	13	32340978	A	G	N2208S	0	0	0	1	0	1	0	2
rs398122566	13	32330920	A	G	N228S	0	0	0	1	0	1	0	2
rs397507381	13	32354890	A	G	N2346S	0	0	0	1	0	1	0	2
rs748339683	13	32330940	A	G	N235D	0	1	0	1	0	0	0	2
rs80358955	13	32355160	A	G	N2436S	0	1	0	1	0	0	0	2
rs778060629	13	32357895	A	G	N2591D	0	0	0	1	0	1	0	2
rs80359020	13	32362648	A	G	N2644S	0	0	0	1	0	1	0	2
rs1419882645	13	32332308	A	G	N277S	0	0	0	1	0	1	0	2
rs876660403	13	32370995	A	G	N2843D	0	0	0	1	0	1	0	2
rs80359107	13	32370996	A	G	N2843S	0	0	0	1	0	1	0	2
rs766173	13	32332343	A	G	N289D	0	0	0	1	0	1	0	2
rs397508008	13	32379351	A	G	N2930S	0	0	0	1	0	1	0	2
rs1319143597	13	32396898	A	G	N3168D	0	0	0	1	0	1	0	2
rs1270441968	13	32332856	A	G	N460D	0	1	0	1	0	0	0	2
rs398122728	13	32333060	A	G	N528D	0	0	0	1	0	1	0	2
rs80358463	13	32319188	A	G	N60S	0	0	0	1	0	1	0	2
rs276174818	13	32319224	A	G	N72S	0	0	0	1	0	1	0	2
rs876661089	13	32336760	A	G	N802S	0	0	0	1	0	1	0	2
rs587781483	13	32336828	A	G	N825D	0	0	0	1	0	1	0	2
rs80358519	13	32336910	A	G	N852S	0	0	0	1	0	1	0	2
rs1413706911	13	32336915	A	G	N854D	0	0	0	1	0	1	0	2
rs730881515	13	32337069	A	G	N905S	0	0	0	1	0	1	0	2
rs28897718	13	32337312	A	G	N986S	0	0	0	1	0	1	0	2
rs431825301	13	32337522	A	G	Q1056R	0	0	0	1	0	1	0	2
rs1060502424	13	32338059	A	G	Q1235R	0	1	0	1	0	0	0	2
rs1473942366	13	32338875	A	G	Q1507R	0	1	0	1	0	0	0	2
rs786202537	13	32340147	A	G	Q1931R	0	1	0	1	0	0	0	2
rs80358852	13	32340480	A	G	Q2042R	0	0	0	1	1	0	0	2
rs587781610	13	32340834	A	G	Q2160R	0	1	0	1	0	0	0	2
rs80359059	13	32363343	A	G	Q2714R	0	0	0	1	0	1	0	2
rs763943647	13	32379432	A	G	Q2957R	0	1	0	1	0	0	0	2
rs80359164	13	32379897	A	G	Q3034R	0	0	0	1	0	1	0	2
rs56245590	13	32336913	A	G	Q853R	0	0	0	1	0	1	0	2
rs80358959	13	32330970	A	G	R245G	0	0	1	1	0	0	0	2
rs398122759	13	32337365	A	G	S1004G	0	1	0	1	0	0	0	2
rs1386536852	13	32337377	A	G	S1008G	0	0	0	1	0	1	0	2
rs398122781	13	32338649	A	G	S1432G	0	1	0	1	0	0	0	2
rs756105620	13	32363315	A	G	S2705G	0	0	0	1	0	1	0	2
rs1311718055	13	32398519	A	G	S3336G	0	1	0	1	0	0	0	2
rs786203711	13	32337554	A	G	T1067A	0	0	1	1	0	0	0	2
rs786204212	13	32337701	A	G	T1116A	0	0	0	1	0	1	0	2
rs587782186	13	32339312	A	G	T1653A	0	0	1	1	0	0	0	2
rs769627725	13	32339762	A	G	T1803A	0	0	0	1	0	1	0	2
rs779878000	13	32339927	A	G	T1858A	0	0	0	1	0	1	0	2
rs587782249	13	32340431	A	G	T2026A	0	1	0	1	0	0	0	2
rs431825348	13	32354862	A	G	T2337A	0	0	0	1	0	1	0	2
rs771087264	13	32355264	A	G	T2471A	0	0	0	1	0	1	0	2
rs1217128211	13	32332283	A	G	T269A	0	0	1	1	0	0	0	2
rs28897710	13	32333270	A	G	T598A	0	0	0	1	0	1	0	2
rs144192844	13	32336348	A	G	T665A	0	0	0	1	0	1	0	2
rs80358508	13	32336783	A	G	T810A	0	0	0	1	0	1	0	2
rs80358639	13	32338293	A	G	Y1313C	0	0	1	0	1	0	0	2
rs1486461236	13	32338326	A	G	Y1324C	0	0	1	0	1	0	0	2
rs397507838	13	32340636	A	G	Y2094C	0	0	1	0	1	0	0	2
rs397507875	13	32341020	A	G	Y2222C	0	0	1	0	1	0	0	2
rs372188754	13	32330932	A	G	Y232C	0	0	1	0	1	0	0	2
rs80358939	13	32354941	A	G	Y2363C	0	0	1	0	1	0	0	2
rs587781494	13	32376688	A	G	Y2884C	0	0	1	0	1	0	0	2
rs80359237	13	32398190	A	G	Y3226C	0	0	1	0	1	0	0	2
rs397507276	13	32333277	A	G	Y600C	0	0	1	0	1	0	0	2
rs28897713	13	32336418	A	G	Y688C	0	0	1	0	1	0	0	2
rs431825299	13	32337144	A	G	Y930C	0	0	1	0	1	0	0	2
rs1303026901	13	32337994	A	T	E1213D	0	0	0	1	0	1	0	2
rs587780549	13	32336953	A	T	E866D	0	0	0	1	0	1	0	2
rs80358796	13	32340069	A	T	H1905L	0	0	1	1	0	0	0	2
rs780621780	13	32340417	A	T	H2021L	0	1	1	0	0	0	0	2
rs587776474	13	32380056	A	T	H3056L	0	0	1	0	1	0	0	2
rs80358430	13	32332896	A	T	H473L	0	0	1	0	1	0	0	2
rs80358591	13	32337806	A	T	I1151F	0	0	0	1	1	0	0	2
rs1159807733	13	32338784	A	T	I1477F	0	0	0	1	1	0	0	2
rs56072130	13	32339102	A	T	I1583F	0	0	0	1	1	0	0	2
rs876660249	13	32355213	A	T	I2454F	0	1	0	1	0	0	0	2
rs1057520802	13	32397015	A	T	I3207F	0	0	0	1	1	0	0	2
rs80358821	13	32340246	A	T	K1964M	0	1	1	0	0	0	0	2
rs765669556	13	32340748	A	T	K2131N	0	0	0	1	1	0	0	2
rs397507399	13	32332303	A	T	K275N	0	1	0	1	0	0	0	2
rs587782098	13	32398494	A	T	K3327N	0	1	0	1	0	0	0	2
rs431825280	13	32332624	A	T	K382N	0	1	0	1	0	0	0	2
rs1410747576	13	32337331	A	T	K992N	0	1	0	1	0	0	0	2
rs397507770	13	32339543	A	T	N1730Y	0	1	1	0	0	0	0	2
rs80358876	13	32340758	A	T	N2135Y	0	1	1	0	0	0	0	2
rs1350502382	13	32332874	A	T	N466Y	0	1	1	0	0	0	0	2
rs876659783	13	32379433	A	T	Q2957H	0	1	0	1	0	0	0	2
rs80358741	13	32339519	A	T	S1722C	0	1	1	0	0	0	0	2
rs397507348	13	32339582	A	T	S1743C	0	0	1	1	0	0	0	2
rs80359081	13	32370438	A	T	T2790S	0	1	0	1	0	0	0	2
rs771921490	13	32339337	A	T	Y1661F	0	0	1	1	0	0	0	2
rs55773834	13	32337168	C	A	A938E	0	0	0	1	1	0	0	2
rs398122751	13	32337031	C	A	F892L	0	1	0	1	0	0	0	2
rs2219594	13	32339036	C	A	H1561N	0	0	1	1	0	0	0	2
rs80358745	13	32339546	C	A	H1731N	0	0	1	1	0	0	0	2
rs587778123	13	32340467	C	A	H2038N	0	0	1	1	0	0	0	2
rs34309943	13	32340575	C	A	H2074N	0	1	0	1	0	0	0	2
rs80358885	13	32340887	C	A	H2178N	0	0	1	1	0	0	0	2
rs730881580	13	32355038	C	A	H2395Q	0	0	1	1	0	0	0	2
rs876658421	13	32341088	C	A	L2245M	0	1	0	1	0	0	0	2
rs876660803	13	32394691	C	A	L3087I	0	0	0	1	0	1	0	2
rs548313038	13	32332777	C	A	N433K	0	0	0	1	0	1	0	2
rs56331088	13	32336845	C	A	N830K	0	0	0	1	1	0	0	2
rs1060502429	13	32339757	C	A	P1801Q	0	0	0	1	1	0	0	2
rs80358964	13	32355282	C	A	P2477T	0	1	0	1	0	0	0	2
rs754587041	13	32332836	C	A	P453Q	0	1	0	1	0	0	0	2
rs876660590	13	32333141	C	A	P555T	0	1	0	1	0	0	0	2
rs80358469	13	32333295	C	A	P606Q	0	0	0	1	0	1	0	2
rs1163156807	13	32333360	C	A	P628T	0	1	0	1	0	0	0	2
rs28897712	13	32336319	C	A	P655Q	0	1	0	1	0	0	0	2
rs80358524	13	32336984	C	A	P877T	0	1	0	1	0	0	0	2
rs79728106	13	32337521	C	A	Q1056K	0	0	0	1	0	1	0	2
rs746661607	13	32340653	C	A	Q2100K	0	1	0	0	0	1	0	2
rs773356478	13	32336936	C	A	Q861K	0	1	0	1	0	0	0	2
rs373203204	13	32376723	C	A	R2896S	0	0	0	1	0	0	1	2
rs398122528	13	32339599	C	A	S1748R	0	1	0	1	0	0	0	2
rs945880747	13	32338488	C	A	T1378N	0	1	0	1	0	0	0	2
rs1431008455	13	32398676	C	A	T3388K	0	1	0	1	0	0	0	2
rs80358509	13	32336784	C	A	T810N	0	0	0	1	0	1	0	2
rs431825310	13	32337933	C	G	A1193G	0	1	0	1	0	0	0	2
rs760071561	13	32338020	C	G	A1222G	0	0	0	1	0	1	0	2
rs80358760	13	32339745	C	G	A1797G	0	1	0	1	0	0	0	2
rs1373277359	13	32332491	C	G	A338G	0	0	0	1	0	1	0	2
rs587782055	13	32333358	C	G	A627G	0	1	0	1	0	0	0	2
rs876660013	13	32363242	C	G	D2680E	0	1	0	0	0	1	0	2
rs876661072	13	32396906	C	G	D3170E	0	1	0	0	0	1	0	2
rs876660036	13	32355263	C	G	F2470L	0	0	1	1	0	0	0	2
rs876661266	13	32380057	C	G	H3056Q	0	1	0	1	0	0	0	2
rs1064795054	13	32325162	C	G	L135V	0	0	0	1	0	1	0	2
rs80358941	13	32354949	C	G	L2366V	0	1	0	1	0	0	0	2
rs367889303	13	32398681	C	G	L3390V	0	1	0	1	0	0	0	2
rs80358489	13	32336480	C	G	L709V	0	1	0	1	0	0	0	2
rs916055887	13	32336690	C	G	L779V	0	1	0	1	0	0	0	2
rs80358647	13	32338321	C	G	N1322K	0	0	0	1	0	1	0	2
rs760773155	13	32338716	C	G	P1454R	0	0	0	1	1	0	0	2
rs80358903	13	32341125	C	G	P2257R	0	0	0	1	1	0	0	2
rs876660668	13	32354892	C	G	P2347A	0	0	0	1	0	1	0	2
rs1353560465	13	32396976	C	G	P3194A	0	1	0	1	0	0	0	2
rs28897712	13	32336319	C	G	P655R	0	1	0	1	0	0	0	2
rs730881512	13	32336517	C	G	P721R	0	1	0	1	0	0	0	2
rs80358524	13	32336984	C	G	P877A	0	1	0	1	0	0	0	2
rs80358419	13	32332739	C	G	Q421E	0	1	0	0	0	1	0	2
rs80358472	13	32333303	C	G	Q609E	0	1	0	0	0	1	0	2
rs276174836	13	32338137	C	G	S1261C	0	0	1	1	0	0	0	2
rs1272409475	13	32340309	C	G	S1985C	0	1	0	1	0	0	0	2
rs398122621	13	32398235	C	G	S3241C	0	1	0	1	0	0	0	2
rs876658246	13	32398508	C	G	S3332C	0	0	0	1	0	1	0	2
rs80358729	13	32339406	C	G	T1684S	0	0	0	1	0	1	0	2
rs587781513	13	32330989	C	G	T251R	0	0	0	1	1	0	0	2
rs80358388	13	32398583	C	G	T3357R	0	0	0	1	1	0	0	2
rs730881584	13	32398751	C	G	T3413R	0	0	0	1	1	0	0	2
rs762559804	13	32333175	C	G	T566S	0	0	0	1	0	1	0	2
rs762591130	13	32336334	C	G	T660S	0	0	0	1	0	1	0	2
rs80358484	13	32336379	C	G	T675R	0	0	0	1	1	0	0	2
rs276174830	13	32337153	C	G	T933R	0	0	0	1	1	0	0	2
rs431825310	13	32337933	C	T	A1193V	0	1	0	1	0	0	0	2
rs1376024712	13	32339478	C	T	A1708V	0	0	0	1	0	1	0	2
rs730881539	13	32340042	C	T	A1896V	0	0	0	1	1	0	0	2
rs80358829	13	32340327	C	T	A1991V	0	0	0	1	0	1	0	2
rs980859921	13	32340909	C	T	A2185V	0	1	0	1	0	0	0	2
rs80358932	13	32354905	C	T	A2351V	0	0	0	1	0	1	0	2
rs74047012	13	32356593	C	T	A2534V	0	0	0	1	0	1	0	2
rs80359116	13	32371059	C	T	A2864V	0	0	0	1	0	1	0	2
rs56390402	13	32332938	C	T	A487V	0	1	0	1	0	0	0	2
rs587778129	13	32325099	C	T	H114Y	0	1	1	0	0	0	0	2
rs786203756	13	32338022	C	T	H1223Y	0	0	1	0	1	0	0	2
rs80358749	13	32339609	C	T	H1752Y	0	0	1	1	0	0	0	2
rs80358803	13	32340107	C	T	H1918Y	0	0	1	1	0	0	0	2
rs1260385979	13	32341106	C	T	H2251Y	0	1	1	0	0	0	0	2
rs786203493	13	32354934	C	T	H2361Y	0	0	1	0	0	1	0	2
rs768605944	13	32332322	C	T	H282Y	0	0	1	0	0	1	0	2
rs760189451	13	32394892	C	T	H3154Y	0	1	0	0	0	1	0	2
rs755777807	13	32337239	C	T	H962Y	0	1	1	0	0	0	0	2
rs876660892	13	32340671	C	T	L2106F	0	1	0	1	0	0	0	2
rs775035051	13	32340818	C	T	L2155F	0	1	0	1	0	0	0	2
rs786202214	13	32341184	C	T	L2277F	0	1	0	1	0	0	0	2
rs398122734	13	32333363	C	T	L629F	0	1	0	1	0	0	0	2
rs80358572	13	32337617	C	T	P1088S	0	0	1	1	0	0	0	2
rs80358734	13	32339459	C	T	P1702S	0	0	0	1	1	0	0	2
rs876659214	13	32339811	C	T	P1819L	0	0	1	1	0	0	0	2
rs863224595	13	32340195	C	T	P1947L	0	0	1	1	0	0	0	2
rs80358909	13	32344563	C	T	P2283S	0	0	0	1	0	1	0	2
rs146120136	13	32370456	C	T	P2796S	0	1	0	1	0	0	0	2
rs932755856	13	32376694	C	T	P2886L	0	0	1	1	0	0	0	2
rs1266625701	13	32316464	C	T	P2S	0	0	0	1	0	1	0	2
rs80359172	13	32380050	C	T	P3054L	0	0	0	1	1	0	0	2
rs397507432	13	32397001	C	T	P3202L	0	0	1	1	0	0	0	2
rs730881572	13	32397021	C	T	P3209S	0	0	1	1	0	0	0	2
rs80358409	13	32332602	C	T	P375L	0	0	1	1	0	0	0	2
rs397507263	13	32332644	C	T	P389L	0	0	1	1	0	0	0	2
rs587776459	13	32332818	C	T	P447L	0	0	1	1	0	0	0	2
rs80358425	13	32319145	C	T	P46S	0	1	0	1	0	0	0	2
rs786202916	13	32332956	C	T	P493L	0	0	1	1	0	0	0	2
rs80358469	13	32333295	C	T	P606L	0	0	0	1	0	1	0	2
rs80358510	13	32336796	C	T	P814L	0	0	1	1	0	0	0	2
rs80358514	13	32336858	C	T	P835S	0	0	0	1	1	0	0	2
rs397507288	13	32336862	C	T	P836L	0	0	0	1	1	0	0	2
rs80358524	13	32336984	C	T	P877S	0	1	0	1	0	0	0	2
rs80358815	13	32340219	C	T	S1955L	0	0	1	1	0	0	0	2
rs587782597	13	32340258	C	T	S1968L	0	0	1	1	0	0	0	2
rs80358881	13	32340810	C	T	S2152F	0	1	1	0	0	0	0	2
rs1239798218	13	32344624	C	T	S2303F	0	1	0	0	0	1	0	2
rs80359054	13	32363313	C	T	S2704F	0	0	1	0	0	1	0	2
rs867323565	13	32332386	C	T	S303F	0	0	0	0	1	1	0	2
rs398122621	13	32398235	C	T	S3241F	0	1	1	0	0	0	0	2
rs769368098	13	32332536	C	T	S353L	0	0	1	0	0	1	0	2
rs80358421	13	32332803	C	T	S442L	0	1	1	0	0	0	0	2
rs1064794018	13	32332968	C	T	S497L	0	0	1	0	1	0	0	2
rs886040398	13	32336298	C	T	S648L	0	0	1	1	0	0	0	2
rs397507282	13	32336586	C	T	S744L	0	0	1	0	0	1	0	2
rs397507296	13	32337273	C	T	S973L	0	0	0	0	1	1	0	2
rs1010143466	13	32337504	C	T	T1050I	0	0	1	1	0	0	0	2
rs386833396	13	32316510	C	T	T17I	0	1	0	1	0	0	0	2
rs1228610692	13	32340432	C	T	T2026I	0	1	0	1	0	0	0	2
rs587781847	13	32354902	C	T	T2350I	0	0	0	1	0	1	0	2
rs431825355	13	32357815	C	T	T2564I	0	0	0	1	1	0	0	2
rs1064794265	13	32331004	C	T	T256I	0	1	0	1	0	0	0	2
rs730881583	13	32397028	C	T	T3211I	0	1	0	1	0	0	0	2
rs768210077	13	32398238	C	T	T3242I	0	0	1	1	0	0	0	2
rs80359250	13	32398430	C	T	T3306I	0	1	0	1	0	0	0	2
rs1064793062	13	32332800	C	T	T441I	0	0	0	1	0	1	0	2
rs781763239	13	32333076	C	T	T533I	0	1	0	1	0	0	0	2
rs1064795258	13	32338916	CTA	G	L1521M	0	1	0	1	0	0	0	2
rs587782182	13	32339357	G	A	A1668T	0	1	0	1	0	0	0	2
rs786204275	13	32339528	G	A	A1725T	0	0	0	1	0	1	0	2
rs758379999	13	32341046	G	A	A2231T	0	0	0	1	0	1	0	2
rs587781435	13	32341100	G	A	A2249T	0	1	0	1	0	0	0	2
rs730881550	13	32344632	G	A	A2306T	0	0	0	1	0	1	0	2
rs730881552	13	32354979	G	A	A2376T	0	0	0	1	0	1	0	2
rs80359052	13	32363294	G	A	A2698T	0	0	0	1	0	1	0	2
rs730881569	13	32394694	G	A	A3088T	0	0	0	1	0	1	0	2
rs528504546	13	32397009	G	A	A3205T	0	0	0	1	0	1	0	2
rs80358432	13	32332925	G	A	A483T	0	1	0	1	0	0	0	2
rs80358437	13	32332961	G	A	A495T	0	0	0	1	0	1	0	2
rs786203045	13	32337038	G	A	A895T	0	0	0	1	0	1	0	2
rs41293485	13	32338224	G	A	C1290Y	0	0	1	1	0	0	0	2
rs56249050	13	32339073	G	A	C1573Y	0	0	1	0	1	0	0	2
rs398122784	13	32339094	G	A	C1580Y	0	0	1	0	1	0	0	2
rs757148516	13	32340198	G	A	C1948Y	0	0	1	1	0	0	0	2
rs1168669263	13	32340228	G	A	C1958Y	0	0	1	0	1	0	0	2
rs56157628	13	32340234	G	A	C1960Y	0	0	1	0	1	0	0	2
rs55924966	13	32355271	G	A	C2473Y	0	0	1	0	1	0	0	2
rs587782614	13	32398724	G	A	C3404Y	0	1	1	0	0	0	0	2
rs1060502397	13	32337884	G	A	D1177N	0	0	1	1	0	0	0	2
rs1060502404	13	32337950	G	A	D1199N	0	0	1	1	0	0	0	2
rs774392592	13	32337983	G	A	D1210N	0	0	0	1	1	0	0	2
rs1191600785	13	32338154	G	A	D1267N	0	0	1	1	0	0	0	2
rs1176598028	13	32338973	G	A	D1540N	0	0	0	1	0	1	0	2
rs183478654	13	32339696	G	A	D1781N	0	1	0	1	0	0	0	2
rs371189402	13	32340050	G	A	D1899N	0	0	0	1	1	0	0	2
rs4987048	13	32340059	G	A	D1902N	0	0	1	1	0	0	0	2
rs764827027	13	32340080	G	A	D1909N	0	1	0	1	0	0	0	2
rs776936973	13	32355165	G	A	D2438N	0	0	1	1	0	0	0	2
rs1064794968	13	32355204	G	A	D2451N	0	0	1	1	0	0	0	2
rs549269828	13	32330991	G	A	D252N	0	0	1	1	0	0	0	2
rs80359226	13	32396958	G	A	D3188N	0	0	1	1	0	0	0	2
rs1177212740	13	32332568	G	A	D364N	0	1	0	1	0	0	0	2
rs397507295	13	32337263	G	A	D970N	0	0	1	1	0	0	0	2
rs539613324	13	32337275	G	A	D974N	0	0	1	1	0	0	0	2
rs1316176181	13	32337782	G	A	E1143K	0	0	0	1	1	0	0	2
rs80358615	13	32338103	G	A	E1250K	0	0	1	1	0	0	0	2
rs771112270	13	32338115	G	A	E1254K	0	0	1	1	0	0	0	2
rs397507327	13	32338598	G	A	E1415K	0	1	0	1	0	0	0	2
rs376338226	13	32338886	G	A	E1511K	0	0	0	1	1	0	0	2
rs587782754	13	32339228	G	A	E1625K	0	0	0	1	1	0	0	2
rs1485384156	13	32339348	G	A	E1665K	0	0	1	1	0	0	0	2
rs938190132	13	32339438	G	A	E1695K	0	0	0	1	1	0	0	2
rs80358767	13	32339789	G	A	E1812K	0	0	1	1	0	0	0	2
rs56253082	13	32340137	G	A	E1928K	0	0	0	1	1	0	0	2
rs587782183	13	32340716	G	A	E2121K	0	0	1	1	0	0	0	2
rs587782362	13	32341178	G	A	E2275K	0	0	0	1	1	0	0	2
rs786202920	13	32379437	G	A	E2959K	0	0	0	1	0	1	0	2
rs777397727	13	32398588	G	A	E3359K	0	0	0	1	0	1	0	2
rs876658625	13	32332607	G	A	E377K	0	0	1	1	0	0	0	2
rs786203512	13	32332751	G	A	E425K	0	0	0	1	0	1	0	2
rs587782159	13	32332859	G	A	E461K	0	1	0	1	0	0	0	2
rs1135401938	13	32333312	G	A	E612K	0	1	0	1	0	0	0	2
rs398122746	13	32336723	G	A	E790K	0	0	0	1	0	1	0	2
rs876658391	13	32337014	G	A	E887K	0	0	0	1	1	0	0	2
rs587782645	13	32338263	G	A	G1303D	0	0	1	1	0	0	0	2
rs587781418	13	32338922	G	A	G1523S	0	0	1	1	0	0	0	2
rs80358733	13	32339453	G	A	G1700S	0	0	0	1	1	0	0	2
rs786203948	13	32340029	G	A	G1892S	0	0	0	1	1	0	0	2
rs876659836	13	32340243	G	A	G1963E	0	0	1	1	0	0	0	2
rs879254137	13	32340773	G	A	G2140S	0	0	1	1	0	0	0	2
rs397507372	13	32340858	G	A	G2168E	0	0	1	0	1	0	0	2
rs1454684155	13	32379317	G	A	G2919S	0	1	0	1	0	0	0	2
rs757086356	13	32332614	G	A	G379E	0	0	1	1	0	0	0	2
rs876659513	13	32333093	G	A	G539R	0	0	1	1	0	0	0	2
rs80358466	13	32333282	G	A	G602R	0	0	1	1	0	0	0	2
rs1007336407	13	32336498	G	A	G715R	0	0	1	1	0	0	0	2
rs1060502434	13	32336717	G	A	G788S	0	1	0	1	0	0	0	2
rs587781685	13	32337147	G	A	G931E	0	0	1	0	1	0	0	2
rs1306577496	13	32338005	G	A	R1217K	0	0	1	1	0	0	0	2
rs1064793478	13	32340345	G	A	R1997K	0	0	0	1	0	1	0	2
rs35029074	13	32340678	G	A	R2108H	0	0	0	1	1	0	0	2
rs587782174	13	32341173	G	A	R2273K	0	1	0	1	0	0	0	2
rs1302207132	13	32355019	G	A	R2389K	0	1	0	1	0	0	0	2
rs56070345	13	32356497	G	A	R2502H	0	0	0	1	1	0	0	2
rs397507435	13	32332449	G	A	R324K	0	0	0	1	0	1	0	2
rs398122725	13	32332782	G	A	R435K	0	0	0	1	0	1	0	2
rs80358483	13	32336358	G	A	R668K	0	0	0	1	0	1	0	2
rs745817393	13	32337963	G	A	S1203N	0	1	0	0	0	1	0	2
rs80358801	13	32340096	G	A	S1914N	0	1	0	1	0	0	0	2
rs28897738	13	32340300	G	A	S1982N	0	1	0	0	0	1	0	2
rs80359051	13	32363292	G	A	S2697N	0	0	0	1	0	1	0	2
rs778052683	13	32379759	G	A	S2988N	0	0	0	1	0	1	0	2
rs398122720	13	32379849	G	A	S3018N	0	1	0	0	0	1	0	2
rs1015087797	13	32337995	G	A	V1214M	0	1	0	1	0	0	0	2
rs786203538	13	32338040	G	A	V1229I	0	0	0	1	0	1	0	2
rs80358705	13	32339183	G	A	V1610M	0	1	0	1	0	0	0	2
rs80358766	13	32339783	G	A	V1810I	0	0	0	1	0	1	0	2
rs80358777	13	32339909	G	A	V1852I	0	0	0	1	0	1	0	2
rs1387721179	13	32355072	G	A	V2407I	0	0	0	1	0	1	0	2
rs80358990	13	32357757	G	A	V2545I	0	0	0	1	0	1	0	2
rs80359094	13	32370522	G	A	V2818I	0	0	0	1	0	1	0	2
rs59004709	13	32379467	G	A	V2969M	0	0	0	1	0	1	0	2
rs1006688520	13	32379485	G	A	V2975I	0	0	0	1	0	1	0	2
rs1434807519	13	32379515	G	A	V2985I	0	1	0	0	0	1	0	2
rs55933907	13	32380124	G	A	V3079I	0	0	0	1	0	1	0	2
rs80359194	13	32394703	G	A	V3091I	0	0	0	1	0	1	0	2
rs398122615	13	32394928	G	A	V3166I	0	0	0	1	0	1	0	2
rs876658303	13	32336552	G	A	V733I	0	0	0	1	0	1	0	2
rs730881520	13	32337509	G	C	A1052P	0	0	0	1	1	0	0	2
rs1135401831	13	32331018	G	C	A261P	0	1	0	1	0	0	0	2
rs767378196	13	32340279	G	C	C1975S	0	0	1	1	0	0	0	2
rs1230674723	13	32333325	G	C	C616S	0	0	1	1	0	0	0	2
rs398122727	13	32332883	G	C	D469H	0	1	0	1	0	0	0	2
rs878853586	13	32339084	G	C	E1577Q	0	1	0	1	0	0	0	2
rs80358735	13	32339462	G	C	E1703Q	0	1	0	1	0	0	0	2
rs146351301	13	32340038	G	C	E1895Q	0	0	1	1	0	0	0	2
rs80358915	13	32344617	G	C	E2301Q	0	1	0	1	0	0	0	2
rs587782860	13	32371079	G	C	E2871Q	0	0	0	1	0	1	0	2
rs587782014	13	32336948	G	C	E865Q	0	1	0	1	0	0	0	2
rs876659892	13	32337016	G	C	E887D	0	1	0	1	0	0	0	2
rs431825309	13	32337906	G	C	G1184A	0	1	0	1	0	0	0	2
rs56191579	13	32340486	G	C	G2044A	0	0	1	1	0	0	0	2
rs276174808	13	32332879	G	C	K467N	0	1	0	1	0	0	0	2
rs398122560	13	32340895	G	C	L2180F	0	1	0	1	0	0	0	2
rs756182263	13	32341147	G	C	L2264F	0	1	0	1	0	0	0	2
rs876659550	13	32336503	G	C	Q716H	0	1	0	1	0	0	0	2
rs879255462	13	32330971	G	C	R245T	0	0	1	1	0	0	0	2
rs745817393	13	32337963	G	C	S1203T	0	1	0	0	0	1	0	2
rs778052683	13	32379759	G	C	S2988T	0	0	0	0	0	1	1	2
rs28897749	13	32363384	G	C	V2728L	0	0	0	1	0	1	0	2
rs1320594065	13	32363477	G	C	V2759L	0	0	0	1	0	1	0	2
rs756951335	13	32337026	G	C	V891L	0	0	0	1	0	1	0	2
rs1455903281	13	32337482	G	T	A1043S	0	0	0	1	0	1	0	2
rs1202062406	13	32338586	G	T	A1411S	0	1	0	1	0	0	0	2
rs397507361	13	32340119	G	T	A1922S	0	1	0	1	0	0	0	2
rs730881550	13	32344632	G	T	A2306S	0	0	0	1	0	1	0	2
rs28897747	13	32363351	G	T	A2717S	0	0	0	1	0	1	0	2
rs730881565	13	32371037	G	T	A2857S	0	1	0	1	0	0	0	2
rs949790323	13	32394874	G	T	A3148S	0	0	0	1	0	1	0	2
rs397507315	13	32338149	G	T	C1265F	0	0	1	1	0	0	0	2
rs764939265	13	32338551	G	T	C1399F	0	0	1	0	1	0	0	2
rs730881534	13	32339217	G	T	C1621F	0	0	1	0	1	0	0	2
rs80358399	13	32398670	G	T	C3386F	0	0	1	0	1	0	0	2
rs28897727	13	32338613	G	T	D1420Y	0	1	1	0	0	0	0	2
rs80358696	13	32339010	G	T	G1552V	0	0	1	1	0	0	0	2
rs56191579	13	32340486	G	T	G2044V	0	0	1	1	0	0	0	2
rs80359220	13	32394890	G	T	G3153V	0	1	1	0	0	0	0	2
rs1389778857	13	32332333	G	T	K285N	0	0	1	1	0	0	0	2
rs397507342	13	32339260	G	T	L1635F	0	1	0	1	0	0	0	2
rs587780871	13	32355041	G	T	L2396F	0	1	0	1	0	0	0	2
rs1060502499	13	32339140	G	T	Q1595H	0	1	0	1	0	0	0	2
rs773707172	13	32339520	G	T	S1722I	0	1	1	0	0	0	0	2
rs756912276	13	32338160	G	T	V1269F	0	0	1	1	0	0	0	2
rs869320791	13	32332637	G	T	V387F	0	1	0	1	0	0	0	2
rs397508063	13	32396968	G	T	W3191L	0	0	1	1	0	0	0	2
rs797044976	13	32338148	T	A	C1265S	0	0	1	1	0	0	0	2
rs199863034	13	32338397	T	A	C1348S	0	0	1	1	0	0	0	2
rs781130788	13	32339126	T	A	C1591S	0	0	1	1	0	0	0	2
rs748646927	13	32339698	T	A	D1781E	0	1	0	1	0	0	0	2
rs766043679	13	32394897	T	A	F3155L	0	0	0	1	0	1	0	2
rs757043784	13	32336344	T	A	F663L	0	0	1	1	0	0	0	2
rs1359369718	13	32338405	T	A	H1350Q	0	0	1	1	0	0	0	2
rs776157715	13	32338128	T	A	I1258K	0	0	1	1	0	0	0	2
rs1287470353	13	32398448	T	A	I3312K	0	0	0	1	1	0	0	2
rs80358608	13	32337977	T	A	L1208I	0	1	0	1	0	0	0	2
rs876658494	13	32340066	T	A	L1904H	0	1	0	1	0	0	0	2
rs772795886	13	32341089	T	A	L2245Q	0	1	0	1	0	0	0	2
rs786202150	13	32333147	T	A	L557I	0	0	0	1	0	1	0	2
rs876659910	13	32337324	T	A	M990K	0	0	0	1	1	0	0	2
rs76469517	13	32339821	T	A	N1822K	0	0	0	1	1	0	0	2
rs113114005	13	32326147	T	A	S158T	0	0	0	1	0	1	0	2
rs772324268	13	32340133	T	A	S1926R	0	1	0	0	1	0	0	2
rs143806921	13	32340554	T	A	S2067T	0	1	0	1	0	0	0	2
rs398122722	13	32332544	T	A	S356T	0	1	0	1	0	0	0	2
rs866071378	13	32319157	T	A	S50T	0	1	0	0	0	1	0	2
rs1339661429	13	32333132	T	A	S552T	0	0	0	1	0	1	0	2
rs879255444	13	32336678	T	A	S775T	0	1	0	0	0	1	0	2
rs144862123	13	32337281	T	A	S976T	0	1	0	0	0	1	0	2
rs750818430	13	32398435	T	A	Y3308N	0	0	1	1	0	0	0	2
rs878853558	13	32336432	T	C	C693R	0	0	1	0	1	0	0	2
rs757305371	13	32338362	T	C	F1336S	0	0	1	1	0	0	0	2
rs80358779	13	32339951	T	C	F1866L	0	0	0	1	0	1	0	2
rs886037809	13	32340953	T	C	F2200L	0	1	0	1	0	0	0	2
rs587782433	13	32332274	T	C	F266L	0	0	0	1	0	1	0	2
rs756978580	13	32398598	T	C	F3362S	0	0	1	1	0	0	0	2
rs80358410	13	32332605	T	C	F376S	0	0	1	1	0	0	0	2
rs552526845	13	32336343	T	C	F663S	0	0	1	1	0	0	0	2
rs374769365	13	32337354	T	C	I1000T	0	0	0	1	1	0	0	2
rs587782320	13	32340225	T	C	I1957T	0	0	1	1	0	0	0	2
rs876660049	13	32340936	T	C	I2194T	0	1	0	1	0	0	0	2
rs398122564	13	32341161	T	C	I2269T	0	0	0	1	1	0	0	2
rs80358962	13	32330977	T	C	I247T	0	1	0	1	0	0	0	2
rs1193306401	13	32362570	T	C	I2618T	0	0	0	1	1	0	0	2
rs397507425	13	32394752	T	C	I3107T	0	1	0	1	0	0	0	2
rs79597821	13	32332710	T	C	I411T	0	1	0	1	0	0	0	2
rs397507273	13	32333103	T	C	I542T	0	1	0	1	0	0	0	2
rs771599029	13	32336709	T	C	I785T	0	0	1	1	0	0	0	2
rs80358797	13	32340078	T	C	L1908P	0	0	1	1	0	0	0	2
rs587776468	13	32340399	T	C	L2015S	0	0	1	1	0	0	0	2
rs587781799	13	32332854	T	C	L459S	0	0	0	1	0	1	0	2
rs1376128381	13	32340162	T	C	M1936T	0	0	1	1	0	0	0	2
rs184442109	13	32346854	T	C	M2322T	0	0	0	1	0	1	0	2
rs863224597	13	32356470	T	C	M2493T	0	0	0	1	0	1	0	2
rs138567364	13	32338460	T	C	S1369P	0	0	0	0	1	1	0	2
rs80358937	13	32354925	T	C	S2358P	0	0	0	0	1	1	0	2
rs1173494452	13	32332385	T	C	S303P	0	1	0	0	0	1	0	2
rs779136624	13	32336366	T	C	S671P	0	1	0	0	0	1	0	2
rs398122740	13	32336402	T	C	S683P	0	0	1	0	0	1	0	2
rs878853563	13	32336738	T	C	S795P	0	0	0	0	1	1	0	2
rs753266636	13	32336990	T	C	S879P	0	1	0	0	0	1	0	2
rs81002884	13	32326242	T	C	V159A	0	0	0	1	0	1	0	2
rs864622426	13	32339169	T	C	V1605A	0	1	0	1	0	0	0	2
rs397507843	13	32329443	T	C	V211A	0	0	0	1	0	1	0	2
rs80358894	13	32341038	T	C	V2228A	0	0	0	1	0	1	0	2
rs1295695210	13	32379750	T	C	V2985A	0	0	0	1	0	1	0	2
rs730881517	13	32337198	T	C	V948A	0	1	0	1	0	0	0	2
rs80358583	13	32337758	T	C	Y1135H	0	0	1	1	0	0	0	2
rs730881535	13	32339336	T	C	Y1661H	0	0	1	1	0	0	0	2
rs876658731	13	32339600	T	C	Y1749H	0	0	1	1	0	0	0	2
rs1450006002	13	32355000	T	C	Y2383H	0	0	1	1	0	0	0	2
rs1170435838	13	32379785	T	C	Y2997H	0	0	1	1	0	0	0	2
rs41293521	13	32394724	T	C	Y3098H	0	0	0	1	1	0	0	2
rs587778125	13	32336870	T	C	Y839H	0	0	1	1	0	0	0	2
rs80358799	13	32340092	T	G	C1913G	0	0	1	1	0	0	0	2
rs876661273	13	32355223	T	G	F2457C	0	1	0	1	0	0	0	2
rs80358410	13	32332605	T	G	F376C	0	1	0	1	0	0	0	2
rs80358420	13	32332793	T	G	F439V	0	0	0	1	1	0	0	2
rs1044335769	13	32326125	T	G	H150Q	0	0	1	1	0	0	0	2
rs544942885	13	32332480	T	G	H334Q	0	0	1	1	0	0	0	2
rs755853659	13	32355214	T	G	I2454S	0	0	0	1	1	0	0	2
rs1305610719	13	32336710	T	G	I785M	0	1	0	1	0	0	0	2
rs80358700	13	32339087	T	G	L1578V	0	0	0	1	0	1	0	2
rs1364062389	13	32341146	T	G	L2264W	0	0	1	1	0	0	0	2
rs1064793069	13	32363420	T	G	L2740V	0	0	0	1	0	1	0	2
rs778907270	13	32332406	T	G	L310V	0	1	0	1	0	0	0	2
rs80358540	13	32319301	T	G	L98V	0	0	0	1	0	1	0	2
rs80358904	13	32341140	T	G	M2262R	0	0	0	1	1	0	0	2
rs878853583	13	32338660	T	G	N1435K	0	1	0	1	0	0	0	2
rs1064793724	13	32338699	T	G	N1448K	0	1	0	1	0	0	0	2
rs80358772	13	32339860	T	G	N1835K	0	0	0	1	1	0	0	2
rs1060502412	13	32337607	T	G	S1084R	0	1	0	1	0	0	0	2
rs1224971607	13	32338081	T	G	S1242R	0	0	0	0	1	1	0	2
rs1064793065	13	32338651	T	G	S1432R	0	1	0	0	1	0	0	2
rs876658566	13	32339804	T	G	S1817A	0	0	0	1	0	1	0	2
rs753445027	13	32340074	T	G	S1907A	0	0	0	1	0	1	0	2
rs786204150	13	32356589	T	G	S2533A	0	1	0	1	0	0	0	2
rs1173590589	13	32398261	T	G	S3250A	0	0	0	1	0	1	0	2
rs1057518641	13	32332802	T	G	S442A	0	1	0	1	0	0	0	2
rs1060502431	13	32333309	T	G	S611A	0	0	0	1	0	1	0	2
rs1270386176	13	32337588	T	G	V1078G	0	0	1	1	0	0	0	2
rs587782694	13	32339912	TG	T	C1853L	0	0	1	0	1	0	0	2
rs761130568	13	32337885	A	C	D1177A	1	0	1	1	0	0	0	3
rs878853584	13	32338722	A	C	E1456A	1	0	0	1	0	1	0	3
rs879255445	13	32336766	A	C	E804A	1	0	1	1	0	0	0	3
rs1478974838	13	32337213	A	C	E953A	1	0	0	1	0	1	0	3
rs431825287	13	32333258	A	C	I594L	1	0	0	1	0	1	0	3
rs955263930	13	32340585	A	C	K2077T	1	0	0	1	0	1	0	3
rs768106492	13	32333281	A	C	K601N	1	0	0	1	0	1	0	3
rs730881518	13	32337360	A	C	N1002T	1	0	0	1	1	0	0	3
rs1490054973	13	32376765	A	C	N2910H	1	0	0	1	0	1	0	3
rs775531301	13	32336909	A	C	N852H	1	0	0	1	0	1	0	3
rs763486267	13	32340831	A	C	Q2159P	1	0	0	1	1	0	0	3
rs750755676	13	32336654	A	C	S767R	1	0	0	0	1	1	0	3
rs68071147	13	32326142	A	G	D156G	1	0	0	1	1	0	0	3
rs1170821828	13	32339958	A	G	D1868G	1	0	1	1	0	0	0	3
rs765618026	13	32336988	A	G	D878G	1	0	0	1	0	1	0	3
rs56400215	13	32338104	A	G	E1250G	1	0	1	1	0	0	0	3
rs397507347	13	32339439	A	G	E1695G	1	0	0	1	1	0	0	3
rs864622336	13	32340366	A	G	E2004G	1	0	0	1	0	1	0	3
rs80358847	13	32340441	A	G	E2029G	1	0	1	1	0	0	0	3
rs397507846	13	32340717	A	G	E2121G	1	0	1	1	0	0	0	3
rs80359219	13	32394887	A	G	E3152G	1	0	0	1	0	1	0	3
rs1032226790	13	32337420	A	G	H1022R	1	0	0	1	0	1	0	3
rs786202091	13	32338085	A	G	I1244V	1	0	0	1	0	1	0	3
rs878853590	13	32339893	A	G	I1846M	1	0	0	1	0	1	0	3
rs587782375	13	32339891	A	G	I1846V	1	0	0	1	0	1	0	3
rs80359014	13	32362596	A	G	I2627V	1	0	0	1	0	1	0	3
rs80359037	13	32363216	A	G	I2672V	1	0	0	1	0	1	0	3
rs1228570038	13	32379404	A	G	I2948V	1	0	0	1	0	1	0	3
rs954148397	13	32379806	A	G	K3004E	1	0	1	1	0	0	0	3
rs80359174	13	32380064	A	G	K3059E	1	0	0	1	0	1	0	3
rs956554593	13	32394743	A	G	K3104R	1	0	0	1	0	1	0	3
rs276174923	13	32394776	A	G	K3115R	1	0	0	1	0	1	0	3
rs28897709	13	32333016	A	G	K513R	1	0	0	1	0	1	0	3
rs1060502483	13	32346853	A	G	M2322V	1	0	0	1	0	1	0	3
rs1168653062	13	32330919	A	G	N228D	1	0	0	1	0	1	0	3
rs80359006	13	32357896	A	G	N2591S	1	0	0	1	0	1	0	3
rs730881571	13	32394728	A	G	N3099S	1	0	0	1	0	1	0	3
rs760142268	13	32337311	A	G	N986D	1	0	0	1	0	1	0	3
rs775030825	13	32337543	A	G	Q1063R	1	0	0	1	0	1	0	3
rs55969723	13	32338542	A	G	Q1396R	1	0	0	1	0	1	0	3
rs756335278	13	32326136	A	G	Q154R	1	0	0	1	0	1	0	3
rs1342778078	13	32319227	A	G	Q73R	1	0	0	1	0	1	0	3
rs80358966	13	32356439	A	G	S2483G	1	0	0	1	0	1	0	3
rs1039490629	13	32332397	A	G	S307G	1	0	0	1	0	1	0	3
rs56337919	13	32338194	A	T	D1280V	1	0	1	1	0	0	0	3
rs1218113889	13	32340633	A	T	H2093L	1	0	1	0	1	0	0	3
rs398122538	13	32340005	A	T	I1884F	1	0	0	1	1	0	0	3
rs1434920074	13	32337189	A	T	K945I	1	0	0	1	1	0	0	3
rs431825346	13	32341192	A	T	L2279F	1	0	0	1	0	1	0	3
rs1179768667	13	32339511	A	T	N1719I	1	0	1	0	1	0	0	3
rs28897718	13	32337312	A	T	N986I	1	0	0	0	1	1	0	3
rs80359245	13	32398341	A	T	R3276S	1	0	0	1	0	1	0	3
rs786204212	13	32337701	A	T	T1116S	1	0	0	1	0	1	0	3
rs276174893	13	32330980	C	A	A248D	1	0	0	1	1	0	0	3
rs80359787	13	32338444	C	A	N1363K	1	0	0	1	1	0	0	3
rs748541466	13	32341182	C	A	P2276H	1	0	0	1	1	0	0	3
rs765924757	13	32333294	C	A	P606T	1	0	0	1	0	1	0	3
rs1799954	13	32340455	C	A	R2034S	1	0	1	1	0	0	0	3
rs80358989	13	32357749	C	A	T2542K	1	0	0	1	0	1	0	3
rs431825362	13	32363187	C	A	T2662K	1	0	0	1	0	0	1	3
rs587781917	13	32336349	C	A	T665K	1	0	0	1	0	1	0	3
rs80358932	13	32354905	C	G	A2351G	1	0	0	1	0	1	0	3
rs1005568368	13	32332695	C	G	A406G	1	0	0	1	0	1	0	3
rs772430226	13	32332759	C	G	D427E	1	0	0	1	0	1	0	3
rs1455395828	13	32340462	C	G	P2036R	1	0	0	1	1	0	0	3
rs756318845	13	32370480	C	G	P2804A	1	0	0	1	0	1	0	3
rs876660229	13	32363304	C	G	S2701C	1	0	0	1	0	1	0	3
rs747837583	13	32380098	C	G	S3070C	1	0	0	1	0	1	0	3
rs1046984	13	32333274	C	G	S599C	1	0	0	1	0	1	0	3
rs879255446	13	32337129	C	G	S925C	1	0	0	1	0	1	0	3
rs1401510742	13	32376709	C	G	T2891R	1	0	0	0	0	1	1	3
rs80358822	13	32340251	C	T	H1966Y	1	0	1	1	0	0	0	3
rs1135401896	13	32336411	C	T	L686F	1	0	0	1	0	1	0	3
rs564316199	13	32337540	C	T	P1062L	1	0	1	1	0	0	0	3
rs80359167	13	32379912	C	T	P3039L	1	0	1	1	0	0	0	3
rs765924757	13	32333294	C	T	P606S	1	0	0	1	0	1	0	3
rs41293489	13	32338566	C	T	S1404L	1	0	1	0	0	1	0	3
rs1313592154	13	32340165	C	T	S1937F	1	0	1	0	1	0	0	3
rs80358987	13	32356590	C	T	S2533F	1	0	1	0	1	0	0	3
rs1046984	13	32333274	C	T	S599F	1	0	1	0	0	1	0	3
rs786202354	13	32339475	C	T	T1707I	1	0	0	1	1	0	0	3
rs587782031	13	32339799	C	T	T1815I	1	0	0	1	0	1	0	3
rs80358509	13	32336784	C	T	T810I	1	0	0	1	0	1	0	3
rs767200163	13	32339420	G	A	A1689T	1	0	0	1	0	1	0	3
rs80359007	13	32357907	G	A	A2595T	1	0	0	1	0	1	0	3
rs876658755	13	32363414	G	A	A2738T	1	0	0	1	0	1	0	3
rs771226774	13	32336433	G	A	C693Y	1	0	1	0	1	0	0	3
rs1460835970	13	32355180	G	A	D2443N	1	0	1	1	0	0	0	3
rs368952892	13	32339096	G	A	E1581K	1	0	0	1	0	1	0	3
rs755967190	13	32340785	G	A	E2144K	1	0	1	1	0	0	0	3
rs397507975	13	32363516	G	A	E2772K	1	0	0	1	0	0	1	3
rs398122710	13	32371100	G	A	E2878K	1	0	0	1	0	1	0	3
rs371376730	13	32344642	G	A	S2309N	1	0	0	0	0	1	1	3
rs28897739	13	32340317	G	A	V1988I	1	0	0	1	0	1	0	3
rs1064795405	13	32340269	G	C	A1972P	1	0	1	0	1	0	0	3
rs80358475	13	32333330	G	C	A618P	1	0	0	1	1	0	0	3
rs80358816	13	32340221	G	C	D1956H	1	0	1	1	0	0	0	3
rs147797288	13	32332757	G	C	D427H	1	0	0	1	0	1	0	3
rs730881558	13	32357798	G	C	E2558D	1	0	0	1	0	1	0	3
rs80359808	13	32394933	G	C	E3167D	1	0	0	1	0	1	0	3
rs397507326	13	32338557	G	C	G1401A	1	0	1	1	0	0	0	3
rs80359033	13	32363199	G	C	R2666T	1	0	0	1	0	1	0	3
rs398122764	13	32337756	G	C	S1134T	1	0	0	1	0	1	0	3
rs80358944	13	32354971	G	C	S2373T	1	0	0	1	0	1	0	3
rs80358777	13	32339909	G	C	V1852L	1	0	0	1	0	1	0	3
rs886037812	13	32340590	G	C	V2079L	1	0	0	1	0	1	0	3
rs757647065	13	32346862	G	C	V2325L	1	0	0	1	0	1	0	3
rs786203045	13	32337038	G	T	A895S	1	0	0	1	0	1	0	3
rs765436962	13	32332790	G	T	D438Y	1	0	1	1	0	0	0	3
rs878853610	13	32371036	G	T	E2856D	1	0	0	1	0	1	0	3
rs398122732	13	32333283	G	T	G602V	1	0	1	1	0	0	0	3
rs80358924	13	32346855	G	T	M2322I	1	0	0	1	0	1	0	3
rs786203839	13	32338767	G	T	R1471I	1	0	1	1	0	0	0	3
rs587781763	13	32339342	G	T	V1663F	1	0	0	1	1	0	0	3
rs80359095	13	32370528	G	T	V2820L	1	0	0	1	0	1	0	3
rs431825293	13	32336453	T	A	L700I	1	0	0	1	0	1	0	3
rs1441735974	13	32398163	T	A	M3217K	1	0	0	1	1	0	0	3
rs753445027	13	32340074	T	A	S1907T	1	0	0	1	0	1	0	3
rs878853594	13	32340569	T	A	S2072T	1	0	0	1	0	1	0	3
rs80358877	13	32340768	T	A	V2138D	1	0	1	1	0	0	0	3
rs730881526	13	32338086	T	C	I1244T	1	0	0	1	0	1	0	3
rs1299627822	13	32337411	T	C	L1019P	1	0	1	1	0	0	0	3
rs80359073	13	32363526	T	C	M2775T	1	0	0	1	0	1	0	3
rs781671762	13	32339369	T	C	Y1672H	1	0	1	1	0	0	0	3
rs587782723	13	32338078	T	G	F1241L	1	0	0	1	0	1	0	3
rs28897705	13	32332309	T	G	N277K	1	0	0	1	0	1	0	3
rs730881509	13	32332811	T	G	S445A	1	0	0	1	0	1	0	3
rs80358839	13	32340384	T	G	V2010G	1	0	1	1	0	0	0	3
rs1064793743	13	32340807	T	G	V2151G	1	0	1	1	0	0	0	3
rs587781431	13	32332347	T	G	V290G	1	0	0	1	1	0	0	3
rs398122619	13	32332446	T	G	V323G	1	0	1	1	0	0	0	3
rs1060502470	13	32371095	A	C	H2876P	1	1	1	0	0	0	0	3
rs398122794	13	32339510	A	T	N1719Y	1	1	1	0	0	0	0	3
rs397507428	13	32332416	C	T	S313F	1	1	1	0	0	0	0	3
rs1196515495	13	32363318	A	T	N2706Y	1	1	1	0	0	0	0	3
rs779728869	13	32398229	C	A	S3239Y	1	1	1	0	0	0	0	3
rs2227944	13	32337315	A	T	N987I	1	1	0	0	1	0	0	3
rs56309455	13	32398634	C	T	T3374I	1	1	0	1	0	0	0	3
rs80358679	13	32338833	A	T	E1493V	1	1	0	0	1	0	0	3
rs762394148	13	32339292	A	C	E1646A	1	1	0	1	0	0	0	3
rs80358609	13	32337990	A	T	N1212I	1	1	0	0	1	0	0	3
rs1428422813	13	32339610	A	G	H1752R	1	1	0	1	0	0	0	3
rs55953736	13	32340702	A	G	H2116R	1	1	0	1	0	0	0	3
rs1060502492	13	32362660	G	T	S2648I	1	1	0	0	0	1	0	3
rs11571640	13	32332442	A	C	K322Q	1	1	0	0	0	1	0	3
rs750055488	13	32338316	G	C	D1321H	1	1	0	1	0	0	0	3
rs748358660	13	32339156	G	C	D1601H	1	1	0	1	0	0	0	3
rs1161226532	13	32332773	A	C	E432A	1	1	0	1	0	0	0	3
rs138734772	13	32333072	G	C	E532Q	1	1	0	1	0	0	0	3
rs781087576	13	32363312	T	C	S2704P	1	1	0	0	0	1	0	3
rs1408500302	13	32337481	A	C	L1042F	1	1	0	1	0	0	0	3
rs80358463	13	32319188	A	T	N60I	1	1	0	0	0	1	0	3
rs80358630	13	32338218	A	T	N1288I	1	1	0	0	0	1	0	3
rs80358676	13	32326116	A	T	Q147H	1	1	0	1	0	0	0	3
rs1471265644	13	32338959	C	A	A1535E	1	1	0	1	0	0	0	3
rs587781599	13	32339324	A	C	N1657H	1	1	0	1	0	0	0	3
rs941500711	13	32333323	C	A	N615K	1	1	0	1	0	0	0	3
rs876660919	13	32338860	A	G	Q1502R	1	1	0	1	0	0	0	3
rs1057520249	13	32337174	A	G	Q940R	1	1	0	1	0	0	0	3
rs773600818	13	32340057	A	T	E1901V	1	1	0	0	1	0	0	3
rs431825283	13	32319155	A	T	E49V	1	1	0	0	0	1	0	3
rs786202624	13	32354972	C	G	S2373R	1	1	0	0	0	1	0	3
rs775860292	13	32371094	C	T	H2876Y	1	1	0	0	0	0	1	3
rs1064793516	13	32337036	TA	G	V894E	1	1	0	1	0	0	0	3
rs876659259	13	32339203	A	C	L1616F	1	1	0	1	0	0	0	3
rs1430866716	13	32340656	A	C	N2101H	1	1	0	1	0	0	0	3
rs80358415	13	32319130	C	G	P41A	1	1	0	1	0	0	0	3
rs1060502464	13	32398455	A	C	K3314N	1	1	0	1	0	0	0	3
rs80358567	13	32325081	A	C	N108H	1	1	0	1	0	0	0	3
rs1222261194	13	32340869	T	G	S2172A	1	1	0	1	0	0	0	3
rs775234705	13	32338800	A	G	E1482G	1	1	0	1	0	0	0	3
rs55800493	13	32332518	A	C	Q347P	1	1	0	1	0	0	0	3
rs587781889	13	32363317	C	G	S2705R	1	1	0	0	0	1	0	3
rs587783042	13	32340612	T	C	I2086T	1	1	0	1	0	0	0	3
rs1443304067	13	32338861	A	C	Q1502H	1	1	0	1	0	0	0	3
rs200808363	13	32337798	A	G	Q1148R	1	1	0	1	0	0	0	3
rs980577419	13	32398220	A	G	K3236R	1	1	0	1	0	0	0	3
rs730881556	13	32356448	A	G	N2486D	1	1	0	1	0	0	0	3
rs587782142	13	32336804	A	C	K817Q	1	1	0	1	0	0	0	3
rs876660938	13	32340734	A	C	S2127R	1	1	0	0	1	0	0	3
rs864622399	13	32332769	A	C	T431P	1	1	0	1	0	0	0	3
rs1386446278	13	32338874	C	G	Q1507E	1	1	0	1	0	0	0	3
rs28897754	13	32379412	G	T	K2950N	1	1	0	0	0	1	0	3
rs771442299	13	32332848	A	G	K457R	1	1	0	1	0	0	0	3
rs876660966	13	32332584	A	C	N369T	1	1	0	1	0	0	0	3
rs80358742	13	32339522	A	C	T1723P	1	1	0	1	0	0	0	3
rs878853563	13	32336738	T	A	S795T	1	1	0	0	0	1	0	3
rs748394046	13	32336282	G	T	V643L	1	1	0	1	0	0	0	3
rs397507382	13	32354955	T	G	L2368V	1	1	0	1	0	0	0	3
rs431825318	13	32338538	G	T	A1395S	1	1	0	1	0	0	0	3
rs876659192	13	32333373	C	G	A632G	1	1	0	1	0	0	0	3
rs41293495	13	32339977	T	G	I1874M	1	1	0	1	0	0	0	3
rs80358645	13	32338317	A	T	D1321V	1	1	0	1	0	0	0	3
rs863224594	13	32339882	G	T	A1843S	1	1	0	1	0	0	0	3
rs80358541	13	32337301	A	G	I982M	1	1	0	1	0	0	0	3
rs1252591831	13	32356581	A	C	Q2530P	1	1	0	1	0	0	0	3
rs1235811079	13	32398453	A	G	K3314E	1	1	0	1	0	0	0	3
rs80358584	13	32337768	A	T	Q1138L	1	1	0	0	1	0	0	3
rs876658814	13	32340805	A	C	K2150N	1	1	0	1	0	0	0	3
rs879255473	13	32332444	A	C	K322N	1	1	0	0	0	1	0	3
rs1421854019	13	32332755	A	C	K426T	1	1	0	1	0	0	0	3
rs777994248	13	32337602	A	C	N1083H	1	1	0	1	0	0	0	3
rs80358876	13	32340758	A	C	N2135H	1	1	0	1	0	0	0	3
rs80358835	13	32340348	A	C	Q1998P	1	1	0	1	0	0	0	3
rs80358832	13	32340336	A	G	Q1994R	1	1	0	1	0	0	0	3
rs876661199	13	32344610	A	T	E2298D	1	1	0	1	0	0	0	3
rs1478651557	13	32319152	A	T	E48V	1	1	0	0	0	1	0	3
rs959089047	13	32340255	A	T	K1967M	1	1	1	0	0	0	0	3
rs762841458	13	32338698	A	T	N1448I	1	1	1	0	0	0	0	3
rs80358764	13	32339760	A	T	Q1802L	1	1	0	0	0	1	0	3
rs587783043	13	32340337	A	T	Q1994H	1	1	0	1	0	0	0	3
rs746036918	13	32394841	A	T	T3137S	1	1	0	1	0	0	0	3
rs80359165	13	32379900	A	T	Y3035F	1	1	0	0	0	1	0	3
rs80359198	13	32394717	C	A	D3095E	1	1	0	0	0	1	0	3
rs113507014	13	32398536	C	A	D3341E	1	1	0	0	0	1	0	3
rs878853571	13	32337938	C	A	L1195M	1	1	0	1	0	0	0	3
rs80358881	13	32340810	C	A	S2152Y	1	1	1	0	0	0	0	3
rs587781901	13	32394801	C	A	S3123R	1	1	0	0	0	1	0	3
rs730881554	13	32319116	C	A	S36Y	1	1	0	0	0	1	0	3
rs80358634	13	32338260	C	A	T1302N	1	1	0	1	0	0	0	3
rs80358887	13	32340905	C	G	Q2184E	1	1	0	0	0	1	0	3
rs886040685	13	32354886	C	G	Q2345E	1	1	0	0	0	1	0	3
rs572945276	13	32355243	C	G	Q2464E	1	1	0	0	0	1	0	3
rs80359157	13	32379855	C	G	S3020C	1	1	0	0	0	1	0	3
rs765882871	13	32337419	C	T	H1022Y	1	1	0	0	0	1	0	3
rs80359241	13	32398241	C	T	P3243L	1	1	1	0	0	0	0	3
rs80358415	13	32319130	C	T	P41S	1	1	0	1	0	0	0	3
rs754643404	13	32338968	C	T	S1538F	1	1	0	0	0	1	0	3
rs767567428	13	32340618	C	T	T2088I	1	1	0	0	1	0	0	3
rs864622363	13	32337895	G	C	K1180N	1	1	0	1	0	0	0	3
rs774994294	13	32356480	G	C	K2496N	1	1	0	0	0	1	0	3
rs397507414	13	32379379	G	C	K2939N	1	1	0	0	0	1	0	3
rs398122766	13	32337769	G	C	Q1138H	1	1	0	1	0	0	0	3
rs397507713	13	32325184	G	T	S142I	1	1	0	0	0	1	0	3
rs778806241	13	32363316	G	T	S2705I	1	1	0	0	0	1	0	3
rs398122540	13	32326555	T	A	D191E	1	1	0	0	0	1	0	3
rs1060502432	13	32363371	T	A	D2723E	1	1	0	0	0	1	0	3
rs779408742	13	32338505	T	A	L1384M	1	1	0	1	0	0	0	3
rs769956199	13	32341055	T	C	F2234L	1	1	0	0	0	1	0	3
rs876659899	13	32332298	T	C	F274L	1	1	0	1	0	0	0	3
rs398122624	13	32398370	T	C	I3286T	1	1	0	1	0	0	0	3
rs1060502494	13	32344623	T	C	S2303P	1	1	0	0	0	1	0	3
rs886041145	13	32379422	T	C	S2954P	1	1	0	0	0	1	0	3
rs730881544	13	32340893	T	G	L2180V	1	1	0	1	0	0	0	3
rs276174831	13	32337281	TC	T	S976I	1	1	0	0	0	1	0	3
rs397507311	13	32337984	A	C	D1210A	0	0	1	1	1	0	0	3
rs45491005	13	32340123	A	C	D1923A	0	1	1	1	0	0	0	3
rs80358873	13	32340684	A	C	D2110A	0	0	1	1	1	0	0	3
rs746177907	13	32339463	A	C	E1703A	0	1	0	1	1	0	0	3
rs34351119	13	32339773	A	C	E1806D	0	1	0	1	0	1	0	3
rs1060502474	13	32340601	A	C	E2082D	0	1	0	1	0	1	0	3
rs56016241	13	32332659	A	C	E394A	0	1	1	1	0	0	0	3
rs924234502	13	32319183	A	C	E58D	0	1	0	1	0	1	0	3
rs587782782	13	32333341	A	C	E621D	0	1	0	1	0	1	0	3
[truncated: 1,712 more rows]

## Sheet: EGFR
id	chrom	position	ref	alt	Mutation	SIFT	PolyPhen	SNAP2	I_MUT	PHD_SNP	Level	CGI	Score	cBio	Count
rs746521110	7	55160267	A	G	N476S	0	0	0	1	0	0	0	1	TCGA-B	1
rs1271375100	7	55160303	C	G	T488S	0	0	0	1	0	0	0	1	TCGA-B	1
rs770749711	7	55205336	G	A	A1118T	0	0	0	1	0	0	0	1	TCGA-B	1
rs377444977	7	55143443	G	A	A127T	0	0	0	1	0	0	0	1	TCGA-B	1
rs17337079	7	55173083	G	A	V674I	0	0	0	1	0	0	0	1	TCGA-B	1
rs755189573	7	55143353	G	C	E97Q	0	0	0	1	0	0	0	1	TCGA-B	1
rs755330584	7	55205319	A	G	N1112S	0	1	0	1	0	0	0	2	TCGA-B	1
rs754646330	7	55161537	G	A	E513K	0	0	0	1	0	0	1	2	TCGA-B	1
rs745658347	7	55155884	G	A	S315N	0	0	0	0	0	1	1	2	TCGA-B	1
rs201717672	7	55205586	C	T	A1201V	1	0	0	1	0	1	0	3	TCGA-B	1
rs376822837	7	55198761	G	A	D916N	1	0	0	1	0	1	0	3	TCGA-B	1
rs139429793	7	55155928	G	A	E330K	0	0	0	1	1	0	1	3	TCGA-B	1
rs778985185	7	55163734	G	A	E545K	0	0	0	1	1	0	1	3	TCGA-B	1
rs17289589	7	55143357	G	A	R98Q	0	0	1	1	1	0	0	3	TCGA-B	1
rs762672864	7	55181365	G	C	V786L	0	1	0	1	0	1	0	3	TCGA-B	1
rs199796955	7	55154107	G	A	E282K	0	0	0	1	1	0	1	3	TCGA-B	3
rs144943614	7	55165331	G	A	V592I	0	0	0	1	0	1	1	3	TCGA-B	8
rs532655845	7	55146620	G	A	A147T	1	0	1	1	0	0	1	4	TCGA-B	1
rs758956103	7	55157703	C	G	D416E	1	1	1	0	0	1	0	4	TCGA-B	1
rs776791214	7	55155904	G	A	G322S	1	1	0	1	0	0	1	4	TCGA-B	1
rs762494280	7	55174024	C	T	A722V	0	1	0	1	1	1	0	4	TCGA-B	1
rs570295933	7	55201333	G	A	R1031Q	0	1	1	1	0	0	1	4	TCGA-B	1
rs374501041	7	55202557	G	A	R1068Q	1	0	1	1	0	1	0	4	TCGA-B	2
rs768226783	7	55202571	C	A	P1073T	1	0	1	1	0	1	1	5	TCGA-B	1
rs768627073	7	55161579	C	T	R527W	1	1	1	1	1	0	0	5	TCGA-B	1
rs373578289	7	55173997	A	C	K713T	1	1	1	0	0	1	1	5	TCGA-B	1
rs763666690	7	55191825	C	T	A859V	1	1	1	0	0	1	1	5	TCGA-B	1
rs375919121	7	55142313	C	T	T39M	1	1	1	0	0	1	1	5	TCGA-B	1
rs371114444	7	55161532	C	A	S511Y	1	1	1	0	0	1	1	5	TCGA-B	2
rs1219568637	7	55143404	G	A	E114K	1	0	1	1	1	0	1	5	TCGA-B	4
rs149840192	7	55154129	C	T	A289V	1	1	1	1	0	1	1	6	TCGA-B	1
rs759256622	7	55174764	G	A	A743T	1	1	1	1	0	1	1	6	TCGA-B	1
rs143884981	7	55191767	G	A	A840T	1	1	1	1	0	1	1	6	TCGA-B	1
rs767193132	7	55161606	G	A	V536M	1	1	1	1	0	1	1	6	TCGA-B	1
rs141271101	7	55143379	G	C	Q105H	1	1	1	1	1	1	0	6	TCGA-B	1
rs121913465	7	55181312	G	T	S768I	1	1	1	0	1	1	1	6	TCGA-B	1
rs138847501	7	55154032	G	A	E257K	1	0	1	1	1	1	1	6	TCGA-B	2
rs149248025	7	55201237	G	A	R999H	1	1	1	1	0	1	1	6	TCGA-B	2
rs770193776	7	55173074	C	T	R671C	1	1	1	1	1	0	1	6	TCGA-B	2
rs751295137	7	55152582	G	A	R222H	1	1	1	1	0	1	1	6	TCGA-B	2
rs751192280	7	55201281	G	A	D1014N	1	1	1	1	1	1	1	7	TCGA-B	1
rs767075090	7	55181326	C	G	H773D	1	1	1	1	1	1	1	7	TCGA-B	1
rs17337451	7	55200351	C	G	R962G	1	1	1	1	1	1	1	7	TCGA-B	1
rs1051753269	7	55174029	G	A	G724S	1	1	1	1	1	1	1	7	TCGA-B	1
rs1368179445	7	55200340	G	A	R958H	1	1	1	1	1	1	1	7	TCGA-B	1
rs374952732	7	55191755	C	T	R836C	1	1	1	1	1	1	1	7	TCGA-B	2
rs768336804	7	55173069	G	A	R669Q	1	1	1	1	1	1	1	7	TCGA-B	2
rs759582787	7	55019291	G	C	G5A	0	0	0	0	0	0	0	0
rs1487159143	7	55205472	A	T	H1163L	0	0	0	0	0	0	0	0
rs373990043	7	55202603	C	A	D1083E	0	0	0	0	0	0	0	0
rs1334180707	7	55161510	C	G	Q504E	0	0	0	0	0	0	0	0
rs766347941	7	55205470	C	G	S1162R	0	0	0	0	0	0	0	0
rs1194702075	7	55019339	C	T	A21V	0	0	0	0	0	0	0	0
rs1399981803	7	55205471	C	T	H1163Y	0	0	0	0	0	0	0	0
rs770290445	7	55146711	C	T	S177L	0	0	0	0	0	0	0	0
rs1257423707	7	55019342	G	A	S22N	0	0	0	0	0	0	0	0
rs530692924	7	55146683	G	C	V168L	0	0	0	0	0	0	0	0
rs1052582656	7	55142335	T	A	D46E	0	0	0	0	0	0	0	0
rs1364225726	7	55201753	T	C	S1045P	0	0	0	0	0	0	0	0
rs376598259	7	55205294	T	C	S1104P	0	0	0	0	0	0	0	0
rs766952405	7	55152596	T	C	S227P	0	0	0	0	0	0	0	0
rs764038041	7	55155903	C	A	D321E	1	0	0	0	0	0	0	1
rs759582787	7	55019291	G	A	G5E	0	0	1	0	0	0	0	1
rs1284204782	7	55156550	A	C	I342L	0	0	0	1	0	0	0	1
rs748111724	7	55202535	A	C	K1061Q	0	0	0	1	0	0	0	1
rs760404029	7	55205280	A	C	K1099T	0	0	0	1	0	0	0	1
rs774551548	7	55019363	A	C	K29T	0	0	0	1	0	0	0	1
rs766740458	7	55155913	A	C	K325Q	0	0	0	1	0	0	0	1
rs1009449079	7	55160241	A	C	K467N	0	0	0	1	0	0	0	1
rs1209490447	7	55161613	A	C	K538T	0	0	0	1	0	0	0	1
rs371483915	7	55165334	A	C	K593Q	0	0	0	1	0	0	0	1
rs750713244	7	55157753	A	G	H433R	0	0	0	1	0	0	0	1
rs1255635334	7	55205540	A	G	I1186V	0	0	0	1	0	0	0	1
rs1197924233	7	55160226	A	G	I462M	0	0	0	1	0	0	0	1
rs1221992080	7	55160263	A	G	I475V	0	0	0	1	0	0	0	1
rs747203424	7	55163769	A	G	I556M	0	0	0	1	0	0	0	1
rs746395542	7	55165355	A	G	M600V	0	0	0	1	0	0	0	1
rs375035197	7	55201748	A	G	N1043S	0	0	0	1	0	0	0	1
rs1485236403	7	55205330	A	G	N1116D	0	0	0	1	0	0	0	1
rs551591429	7	55146636	A	G	N152S	0	0	0	1	0	0	0	1
rs770466526	7	55157693	A	G	N413S	0	0	0	1	0	0	0	1
rs762795214	7	55201228	A	G	N996S	0	0	0	1	0	0	0	1
rs780439043	7	55205301	A	G	Q1106R	0	0	0	1	0	0	0	1
rs1179392671	7	55205460	A	G	Q1159R	0	0	0	1	0	0	0	1
rs746023542	7	55142292	A	G	Q32R	0	0	0	1	0	0	0	1
rs369580836	7	55142409	A	G	Q71R	0	0	0	1	0	0	0	1
rs1296356016	7	55201326	A	G	T1029A	0	0	0	1	0	0	0	1
rs775415330	7	55201335	A	G	T1032A	0	0	0	1	0	0	0	1
rs751342391	7	55202586	A	G	T1078A	0	0	0	1	0	0	0	1
rs1230287644	7	55157727	A	T	E424D	0	0	0	1	0	0	0	1
rs751342391	7	55202586	A	T	T1078S	0	0	0	1	0	0	0	1
rs1217714114	7	55019306	C	A	A10E	0	0	0	1	0	0	0	1
rs1318894874	7	55205473	C	A	H1163Q	0	0	0	1	0	0	0	1
rs1186762640	7	55205332	C	A	N1116K	0	0	0	1	0	0	0	1
rs765499904	7	55205389	C	A	N1135K	0	0	0	1	0	0	0	1
rs777435609	7	55205333	C	A	P1117T	0	0	0	1	0	0	0	1
rs778095401	7	55202553	C	A	Q1067K	0	0	0	1	0	0	0	1
rs1358829599	7	55205374	C	A	S1130R	0	0	0	0	1	0	0	1
rs1057519860	7	55160316	C	A	S492R	0	0	0	1	0	0	0	1
rs772071414	7	55146728	C	G	H183D	0	0	0	1	0	0	0	1
rs143152775	7	55165373	C	G	L606V	0	0	0	1	0	0	0	1
rs771988878	7	55173059	C	G	L666V	0	0	0	1	0	0	0	1
rs961967996	7	55165283	C	G	P576A	0	0	0	1	0	0	0	1
rs777701385	7	55201316	C	G	S1025R	0	0	0	1	0	0	0	1
rs78244461	7	55201763	C	T	A1048V	0	0	0	1	0	0	0	1
rs773996588	7	55205337	C	T	A1118V	0	0	0	1	0	0	0	1
rs149321481	7	55155878	C	T	A313V	0	0	0	1	0	0	0	1
rs771988878	7	55173059	C	T	L666F	0	0	0	1	0	0	0	1
rs755238987	7	55202529	C	T	P1059S	0	0	0	1	0	0	0	1
rs868339962	7	55205285	C	T	P1101S	0	0	0	1	0	0	0	1
rs868454218	7	55205339	C	T	P1119S	0	0	0	1	0	0	0	1
rs199738264	7	55205367	C	T	P1128L	0	0	0	1	0	0	0	1
rs1057519830	7	55163737	C	T	P546S	0	0	0	1	0	0	0	1
rs1046438724	7	55152597	C	T	S227F	0	0	0	1	0	0	0	1
rs371234907	7	55156569	C	T	S348L	0	0	0	0	1	0	0	1
rs911767401	7	55019347	G	A	A24T	0	0	0	1	0	0	0	1
rs201061916	7	55165388	G	A	A611T	0	0	0	1	0	0	0	1
rs552062864	7	55155880	G	A	D314N	0	0	0	0	0	0	1	1
rs1276184054	7	55201305	G	A	G1022S	0	0	0	1	0	0	0	1
rs1161834426	7	55202578	G	A	G1075D	0	0	0	1	0	0	0	1
rs776375114	7	55202577	G	A	G1075S	0	0	0	1	0	0	0	1
rs1437762652	7	55143477	G	A	R138K	0	0	0	1	0	0	0	1
rs761795138	7	55146675	G	A	R165Q	0	0	0	1	0	0	0	1
rs759219499	7	55142355	G	A	R53K	0	0	0	1	0	0	0	1
rs779583988	7	55201198	G	A	R986K	0	0	0	1	0	0	0	1
rs771471723	7	55202563	G	A	S1070N	0	0	0	0	0	1	0	1
rs1023675360	7	55146633	G	A	S151N	0	0	0	1	0	0	0	1
rs757699239	7	55201269	G	A	V1010M	0	0	0	1	0	0	0	1
rs142442994	7	55201759	G	A	V1047M	0	0	0	1	0	0	0	1
rs1055315772	7	55205309	G	A	V1109I	0	0	0	1	0	0	0	1
rs1166858113	7	55160161	G	A	V441I	0	0	0	1	0	0	0	1
rs587778249	7	55161570	G	A	V524I	0	0	0	1	0	0	0	1
rs1426364365	7	55173041	G	A	V660M	0	0	0	1	0	0	0	1
rs764780987	7	55202580	G	C	A1076P	0	0	0	0	1	0	0	1
rs780865931	7	55019333	G	C	C19S	0	0	0	1	0	0	0	1
rs747600559	7	55205550	G	C	G1189A	0	0	0	1	0	0	0	1
rs1055315772	7	55205309	G	C	V1109L	0	0	0	1	0	0	0	1
rs587778249	7	55161570	G	C	V524L	0	0	0	1	0	0	0	1
rs1268506326	7	55205288	G	T	A1102S	0	0	0	1	0	0	0	1
rs919891568	7	55146644	G	T	A155S	0	0	0	1	0	0	0	1
rs373129709	7	55019338	G	T	A21S	0	0	0	1	0	0	0	1
rs1467640610	7	55173020	G	T	A653S	0	0	0	1	0	0	0	1
rs758945260	7	55146690	G	T	S170I	0	0	0	0	1	0	0	1
rs769949680	7	55202547	T	A	F1065I	0	0	0	1	0	0	0	1
rs1171743336	7	55160139	T	A	H433Q	0	0	0	1	0	0	0	1
rs746763556	7	55160230	T	A	S464T	0	0	0	1	0	0	0	1
rs1164785061	7	55202584	T	C	L1077S	0	0	0	1	0	0	0	1
rs1281578598	7	55165315	T	G	I586M	0	0	0	1	0	0	0	1
rs746763556	7	55160230	T	G	S464A	0	0	0	1	0	0	0	1
rs1301373415	7	55205604	T	G	F1207C	0	0	1	1	0	0	0	2
rs1343024399	7	55142334	A	T	D46V	1	0	0	0	1	0	0	2
rs770074413	7	55151308	C	A	P192T	1	0	0	1	0	0	0	2
rs1486804407	7	55200393	C	G	Q976E	1	0	0	1	0	0	0	2
rs760711480	7	55161507	G	A	G503S	1	0	0	1	0	0	0	2
rs34352568	7	55201342	T	C	L1034P	1	0	0	1	0	0	0	2
rs773069229	7	55019284	C	A	P3T	0	0	0	1	0	1	0	2
rs773069229	7	55019284	C	T	P3S	0	0	0	1	0	1	0	2
rs774487133	7	55019290	G	C	G5R	0	0	1	1	0	0	0	2
rs755574890	7	55201772	A	C	D1051A	0	0	0	1	1	0	0	2
rs1339627647	7	55161538	A	C	E513A	0	0	0	1	0	0	1	2
rs17290699	7	55201204	A	C	H988P	0	0	1	0	1	0	0	2
rs768208443	7	55160277	A	C	K479N	0	0	0	1	1	0	0	2
rs369498625	7	55205318	A	C	N1112H	0	1	0	1	0	0	0	2
rs758314765	7	55202522	A	C	Q1056H	0	1	0	1	0	0	0	2
rs755574890	7	55201772	A	G	D1051G	0	0	0	1	1	0	0	2
rs1224584642	7	55202542	A	G	D1063G	0	0	0	1	0	0	1	2
rs771366736	7	55143380	A	G	I106V	0	0	0	1	0	1	0	2
rs372990493	7	55160173	A	G	I445V	0	0	0	1	0	1	0	2
rs1021252393	7	55160265	A	G	I475M	0	0	1	1	0	0	0	2
rs1199980775	7	55173080	A	G	I673V	0	0	0	1	0	1	0	2
rs1169803481	7	55198851	A	G	I946V	0	0	0	1	0	1	0	2
rs397517102	7	55174807	A	G	K757R	0	1	0	1	0	0	0	2
rs755504552	7	55200376	A	G	K970R	0	0	0	1	0	1	0	2
rs918187279	7	55205304	A	G	N1107S	0	0	0	1	0	1	0	2
rs779422878	7	55205535	A	G	N1184S	0	0	0	1	0	1	0	2
rs766507267	7	55151321	A	G	N196S	0	0	0	1	0	0	1	2
rs762336338	7	55161582	A	G	N528D	0	0	1	1	0	0	0	2
rs1057519829	7	55154050	A	G	T263A	0	0	0	1	0	0	1	2
rs1436144358	7	55165370	A	G	T605A	0	0	0	1	0	0	1	2
rs1167057229	7	55173095	A	G	T678A	0	0	0	1	0	1	0	2
rs940873450	7	55163753	A	T	E551V	0	0	0	0	1	0	1	2
rs1462369239	7	55201768	A	T	I1050F	0	0	0	1	1	0	0	2
rs756705853	7	55173053	A	T	I664F	0	0	0	1	1	0	0	2
rs1194702075	7	55019339	C	A	A21E	0	0	0	1	1	0	0	2
rs1287531915	7	55161523	C	A	A508D	0	0	0	1	1	0	0	2
rs17289686	7	55146694	C	A	D171E	0	0	0	1	1	0	0	2
rs769537072	7	55165366	C	A	N603K	0	0	0	1	1	0	0	2
rs1442620290	7	55205334	C	A	P1117H	0	0	0	1	1	0	0	2
rs773651001	7	55163791	C	A	P564T	0	0	0	1	0	0	1	2
rs774261340	7	55173960	C	A	Q701K	0	0	0	0	0	1	1	2
rs770529788	7	55198778	C	A	S921R	0	0	0	1	0	1	0	2
rs182857647	7	55201327	C	A	T1029K	0	0	0	1	0	0	1	2
rs756403828	7	55192804	C	G	H888Q	0	0	0	1	0	1	0	2
rs767037049	7	55173026	C	G	L655V	0	0	0	1	0	1	0	2
rs764332519	7	55205286	C	G	P1101R	0	0	0	1	1	0	0	2
rs1408630981	7	55205492	C	G	P1170A	0	0	0	1	0	1	0	2
rs17336639	7	55154060	C	G	P266R	0	0	0	1	0	0	1	2
rs1490923813	7	55201332	C	G	R1031G	0	0	1	1	0	0	0	2
rs774558548	7	55163810	C	G	T570S	0	0	0	1	0	1	0	2
rs759987693	7	55163816	C	G	T572R	0	0	0	1	1	0	0	2
rs1447966312	7	55165305	C	T	A583V	0	0	0	1	0	0	1	2
rs549015965	7	55173964	C	T	A702V	0	0	0	0	0	1	1	2
rs754527029	7	55019329	C	T	L18F	0	0	1	1	0	0	0	2
rs1220356597	7	55154068	C	T	L269F	0	0	1	1	0	0	0	2
rs1157210752	7	55171191	C	T	L633F	0	0	0	1	0	0	1	2
rs767037049	7	55173026	C	T	L655F	0	0	0	1	0	1	0	2
rs1273890779	7	55173966	C	T	L703F	0	0	0	1	0	1	0	2
rs367870311	7	55202622	C	T	P1090S	0	0	0	1	0	1	0	2
rs748219780	7	55163779	C	T	P560S	0	0	0	1	0	0	1	2
rs773651001	7	55163791	C	T	P564S	0	0	0	1	0	0	1	2
rs1235180640	7	55165322	C	T	P589S	0	0	0	1	0	0	1	2
rs552265738	7	55171185	C	T	P631S	0	0	0	1	0	0	1	2
rs781134348	7	55201209	C	T	P990S	0	0	0	1	0	0	1	2
rs182857647	7	55201327	C	T	T1029M	0	1	0	0	0	0	1	2
rs1310061365	7	55160177	C	T	T446I	0	1	0	1	0	0	0	2
rs1422504667	7	55143348	C	T	T95I	0	0	0	1	1	0	0	2
rs764290273	7	55165394	G	A	A613T	0	0	0	1	0	0	1	2
rs1337590341	7	55205421	G	A	C1146Y	0	0	0	1	1	0	0	2
rs535060253	7	55202604	G	A	D1084N	0	0	0	1	1	0	0	2
rs753269876	7	55160218	G	A	D460N	0	0	0	1	0	0	1	2
rs767829342	7	55151344	G	A	E204K	0	0	0	1	1	0	0	2
rs776886714	7	55152578	G	A	G221R	0	0	0	1	1	0	0	2
rs1442908038	7	55142321	G	A	G42S	0	0	0	1	0	1	0	2
rs200664836	7	55152648	G	A	R244Q	0	0	0	1	0	0	1	2
rs150477666	7	55161580	G	A	R527Q	0	0	0	1	1	0	0	2
rs1305428034	7	55173120	G	A	R686K	0	0	0	1	0	1	0	2
rs1161802556	7	55201745	G	A	S1042N	0	1	0	1	0	0	0	2
rs1291943679	7	55152603	G	A	S229N	0	0	0	1	0	0	1	2
rs761844164	7	55155907	G	A	V323I	0	0	0	1	0	0	1	2
rs1351046105	7	55181413	G	A	V802I	0	0	0	1	0	1	0	2
rs1186558284	7	55201762	G	C	A1048P	0	0	0	1	1	0	0	2
rs936074781	7	55173948	G	C	E697Q	0	0	0	1	0	1	0	2
rs746585833	7	55205538	G	C	G1185A	0	0	1	1	0	0	0	2
rs779076899	7	55165397	G	C	G614R	0	0	0	1	1	0	0	2
rs1343156007	7	55205521	G	C	K1179N	0	0	0	1	1	0	0	2
rs756307243	7	55165336	G	C	K593N	0	0	0	1	1	0	0	2
rs771471723	7	55202563	G	C	S1070T	0	0	0	1	0	1	0	2
rs1226829354	7	55201272	G	C	V1011L	0	0	0	1	0	1	0	2
rs201580890	7	55173038	G	C	V659L	0	0	0	1	0	1	0	2
rs865825533	7	55205385	G	T	G1134V	0	0	0	1	1	0	0	2
rs17289589	7	55143357	G	T	R98L	0	0	0	1	1	0	0	2
rs1032201502	7	55202610	T	A	F1086I	0	0	0	1	0	0	1	2
rs773596817	7	55143409	T	A	N115K	0	0	0	1	1	0	0	2
rs762218653	7	55201350	T	A	S1037T	0	0	0	0	0	1	1	2
rs1398462122	7	55146629	T	C	F150L	0	0	0	1	0	1	0	2
rs1001476056	7	55142328	T	C	F44S	0	0	0	1	1	0	0	2
rs1393556056	7	55173054	T	C	I664T	0	0	0	1	0	0	1	2
rs149375515	7	55165356	T	C	M600T	0	0	0	1	0	0	1	2
rs367680488	7	55155908	T	C	V323A	0	0	0	1	0	0	1	2
rs756534868	7	55165404	T	C	V616A	0	0	0	1	0	0	1	2
rs587778247	7	55160283	T	G	F481L	0	0	1	1	0	0	0	2
rs529174941	7	55201769	T	G	I1050S	0	0	0	1	1	0	0	2
rs1051476261	7	55202599	T	G	I1082R	0	0	0	1	1	0	0	2
rs34352568	7	55201342	T	G	L1034R	0	1	0	1	0	0	0	2
rs749400221	7	55202614	T	G	L1087R	0	0	0	1	1	0	0	2
rs1269583681	7	55142416	T	G	N73K	0	0	0	1	1	0	0	2
rs1197499057	7	55156794	A	C	Q390P	1	0	0	1	1	0	0	3
rs1405999227	7	55156637	A	G	I371V	1	0	0	1	0	1	0	3
rs754854319	7	55143473	A	G	M137V	1	0	1	1	0	0	0	3
rs147740818	7	55142324	A	G	T43A	1	0	0	1	0	1	0	3
rs374986786	7	55143305	A	G	T81A	1	0	0	1	0	1	0	3
rs1275431248	7	55201314	A	T	S1025C	1	0	0	1	0	0	1	3
rs1230715733	7	55205441	A	T	S1153C	1	0	1	1	0	0	0	3
rs1275982156	7	55202574	A	T	T1074S	1	0	0	1	0	1	0	3
rs1228970909	7	55163805	C	A	N568K	1	0	0	1	1	0	0	3
rs748219780	7	55163779	C	A	P560T	1	0	0	1	0	0	1	3
rs778011429	7	55165338	C	A	T594N	1	0	0	1	0	0	1	3
rs147732025	7	55160278	C	G	L480V	1	0	0	1	0	1	0	3
rs902672760	7	55205340	C	G	P1119R	1	0	0	1	1	0	0	3
rs776728879	7	55173006	C	G	T648S	1	0	0	1	0	1	0	3
rs745422316	7	55173056	G	A	G665S	1	0	0	1	1	0	0	3
rs769434273	7	55160293	G	T	G485C	1	0	0	1	1	0	0	3
rs1339648899	7	55202545	G	T	S1064I	1	0	1	0	0	1	0	3
rs1357816760	7	55152604	T	A	S229R	1	0	1	1	0	0	0	3
rs542237406	7	55165314	T	C	I586T	1	0	1	1	0	0	0	3
rs1319486482	7	55201246	T	C	M1002T	1	0	1	1	0	0	0	3
rs755356995	7	55173039	T	C	V659A	1	0	0	1	0	1	0	3
rs765496858	7	55201351	C	A	S1037Y	1	1	0	0	0	1	0	3
rs956386356	7	55165309	C	G	H584Q	1	1	0	1	0	0	0	3
rs1178642122	7	55156807	T	G	I394M	1	1	0	1	0	0	0	3
rs35918369	7	55205613	C	T	A1210V	0	1	0	1	0	1	0	3
rs140516819	7	55172999	A	C	I646L	0	1	0	1	0	1	0	3
rs759179459	7	55198791	A	C	I926L	0	0	0	1	0	1	1	3
rs762889647	7	55143450	A	C	K129T	0	0	1	1	1	0	0	3
rs144460286	7	55155922	A	C	K328Q	0	0	1	1	0	0	1	3
rs1332428616	7	55143407	A	C	N115H	0	1	0	1	1	0	0	3
rs1057519829	7	55154050	A	C	T263P	0	0	0	1	1	0	1	3
rs35515689	7	55143347	A	C	T95P	0	1	0	1	1	0	0	3
rs778901010	7	55155929	A	G	E330G	0	0	0	1	1	0	1	3
rs779741928	7	55163762	A	G	E554G	0	0	1	1	0	0	1	3
rs1277911361	7	55155851	A	G	H304R	0	0	1	1	0	0	1	3
rs558565565	7	55157728	A	G	I425V	0	0	0	1	0	1	1	3
rs747133806	7	55174755	A	G	I740V	0	1	0	1	0	1	0	3
rs374084791	7	55154021	A	G	K253R	0	0	0	1	0	1	1	3
rs751701731	7	55205490	A	G	N1169S	0	1	0	1	0	1	0	3
rs937907395	7	55146653	A	G	N158D	0	0	1	1	1	0	0	3
rs147896627	7	55205502	A	G	Q1173R	0	1	0	1	0	1	0	3
rs1258211270	7	55163795	A	G	Q565R	0	1	0	1	0	0	1	3
rs1385682568	7	55143402	A	T	Y113F	0	1	0	1	0	1	0	3
rs764626121	7	55201341	C	A	L1034I	0	1	0	1	0	0	1	3
rs780131926	7	55156631	C	A	L369I	0	1	0	1	0	1	0	3
rs17336639	7	55154060	C	A	P266Q	0	0	0	1	1	0	1	3
rs1274543317	7	55157699	C	A	T415K	0	0	1	1	1	0	0	3
rs1468115455	7	55174786	C	G	A750G	0	0	0	1	0	1	1	3
rs121913434	7	55174725	C	G	L730V	0	0	0	1	1	0	1	3
rs1442620290	7	55205334	C	G	P1117R	0	0	1	1	1	0	0	3
rs772046081	7	55172997	C	G	S645C	0	1	0	1	0	0	1	3
rs121913434	7	55174725	C	T	L730F	0	0	0	1	1	0	1	3
rs764332519	7	55205286	C	T	P1101L	0	0	1	1	1	0	0	3
rs1229095978	7	55143432	C	T	S123F	0	1	1	0	1	0	0	3
rs1020654485	7	55154132	C	T	T290I	0	0	0	1	0	1	1	3
rs369585356	7	55205585	G	A	A1201T	0	0	0	1	0	1	1	3
rs1171287261	7	55191839	G	A	A864T	0	0	0	1	0	1	1	3
rs1256257325	7	55201248	G	A	D1003N	0	0	0	1	1	1	0	3
rs1214761095	7	55165391	G	A	D612N	0	0	0	1	1	1	0	3
rs139388758	7	55205291	G	A	G1103S	0	0	0	1	0	1	1	3
rs201498575	7	55165359	G	A	G601E	0	0	1	0	1	0	1	3
rs1424043738	7	55173050	G	A	G663R	0	0	1	1	1	0	0	3
rs1322818258	7	55181307	G	A	M766I	0	1	0	1	0	1	0	3
rs760101437	7	55154018	G	A	R252H	0	0	0	1	0	1	1	3
rs372202099	7	55154027	G	A	R255Q	0	0	0	1	0	1	1	3
rs758748662	7	55155911	G	A	R324H	0	0	0	1	0	1	1	3
rs370810719	7	55163822	G	A	R574Q	0	0	0	1	1	0	1	3
rs1335854310	7	55151327	G	A	S198N	0	0	1	1	0	0	1	3
rs757265130	7	55156817	G	A	V398I	0	0	0	1	0	1	1	3
rs768074018	7	55205580	G	C	R1199T	0	0	1	1	0	1	0	3
rs147149347	7	55181314	G	C	V769L	0	1	0	1	0	1	0	3
rs567477136	7	55181329	G	C	V774L	0	1	0	1	0	1	0	3
rs200989322	7	55171212	G	T	G640W	0	0	1	1	1	0	0	3
rs1345387967	7	55160146	T	A	F436I	0	0	1	1	1	0	0	3
rs1230904747	7	55157672	T	A	L406Q	0	1	0	1	1	0	0	3
rs776448547	7	55205382	T	A	V1133E	0	0	1	1	1	0	0	3
rs867182279	7	55205510	T	C	F1176L	0	1	0	1	0	1	0	3
rs556324078	7	55205514	T	C	F1177S	0	0	0	1	1	0	1	3
rs1341708803	7	55156652	T	C	F376L	0	0	0	1	1	1	0	3
rs761585117	7	55165296	T	C	I580T	0	0	0	1	1	0	1	3
rs1483973439	7	55154066	T	C	M268T	0	0	1	1	0	0	1	3
rs1215369904	7	55154093	T	C	M277T	0	0	1	1	0	0	1	3
rs761098433	7	55152575	T	C	S220P	0	0	1	0	0	1	1	3
rs200592648	7	55160222	T	C	V461A	0	1	0	1	0	1	0	3
rs752859687	7	55201258	A	C	D1006A	1	0	1	1	1	0	0	4
rs1376117521	7	55165299	A	C	Q581P	1	0	0	1	1	0	1	4
rs887824842	7	55202569	A	G	D1072G	1	0	0	1	0	1	1	4
rs1225496600	7	55201245	A	G	M1002V	1	0	1	1	0	0	1	4
rs1247276424	7	55152602	A	G	S229G	1	0	1	1	0	0	1	4
rs1412517681	7	55154083	A	G	T274A	1	0	0	1	0	1	1	4
rs1317269653	7	55173987	A	G	T710A	1	0	0	1	0	1	1	4
rs1423110562	7	55156596	A	T	K357I	1	0	1	1	0	0	1	4
rs768627073	7	55161579	C	G	R527G	1	0	1	1	1	0	0	4
rs753466844	7	55156587	C	T	T354M	1	0	1	1	0	0	1	4
rs778011429	7	55165338	C	T	T594I	1	0	0	1	1	0	1	4
rs776728879	7	55173006	C	T	T648I	1	0	1	1	0	1	0	4
rs1328333567	7	55202625	G	A	E1091K	1	0	1	1	1	0	0	4
rs1379387764	7	55205570	G	A	E1196K	1	0	1	1	0	1	0	4
rs1370192881	7	55205292	G	A	G1103D	1	0	1	1	0	1	0	4
rs368892932	7	55205438	G	C	D1152H	1	0	1	1	1	0	0	4
rs542237406	7	55165314	T	A	I586N	1	0	1	1	1	0	0	4
rs1206543227	7	55165353	T	A	V599D	1	0	1	1	1	0	0	4
rs1331500903	7	55173959	C	A	N700K	1	1	1	0	0	1	0	4
rs750423932	7	55152551	A	C	K212Q	1	1	1	0	0	1	0	4
rs554981236	7	55152647	C	G	R244G	1	1	0	1	1	0	0	4
rs148019583	7	55201266	G	A	D1009N	1	1	0	0	1	0	1	4
rs1179620001	7	55157674	A	G	I407V	1	1	0	1	0	1	0	4
rs1469310856	7	55205483	C	G	L1167V	1	1	0	1	0	0	1	4
rs587778246	7	55156802	G	C	D393H	1	1	0	1	0	0	1	4
rs1338409357	7	55173107	C	G	L682V	1	1	0	1	0	1	0	4
rs1373423544	7	55174791	T	A	S752T	1	1	0	0	0	1	1	4
rs763924711	7	55198829	A	G	I938M	1	1	0	1	0	1	0	4
rs773034947	7	55200394	A	G	Q976R	1	1	0	1	0	0	1	4
rs575565383	7	55198815	C	T	P934S	1	1	0	1	0	1	0	4
rs397517083	7	55173924	G	C	V689L	1	1	0	1	0	1	0	4
rs767608234	7	55143487	G	T	Q141H	1	1	0	1	0	1	0	4
rs397517102	7	55174807	A	T	K757M	1	1	0	1	0	0	1	4
rs397517134	7	55191861	C	G	A871G	1	1	0	1	0	1	0	4
rs779156097	7	55152549	C	G	T211S	1	1	0	1	0	1	0	4
rs995022327	7	55201277	T	A	D1012E	1	1	1	0	0	1	0	4
rs1042344966	7	55200410	T	G	I981M	1	1	0	1	0	1	0	4
rs147896627	7	55205502	A	C	Q1173P	0	1	0	1	1	1	0	4
rs748000023	7	55192803	A	G	H888R	0	0	0	1	1	1	1	4
rs373578289	7	55173997	A	G	K713R	0	1	0	1	0	1	1	4
rs1247205023	7	55198801	A	G	K929R	0	1	0	1	0	1	1	4
rs756614898	7	55181311	A	G	S768G	0	1	0	1	0	1	1	4
rs748011710	7	55201212	A	G	S991G	0	0	1	1	0	1	1	4
rs1338629905	7	55174781	A	T	R748S	0	1	1	1	0	1	0	4
rs182002674	7	55155852	C	A	H304Q	0	1	1	1	1	0	0	4
rs746677478	7	55181323	C	G	P772A	0	0	0	1	1	1	1	4
rs1480173156	7	55205559	C	T	A1192V	0	1	0	1	0	1	1	4
rs1390766480	7	55157707	C	T	H418Y	0	0	1	1	1	1	0	4
rs751570775	7	55165323	C	T	P589L	0	1	0	1	1	0	1	4
rs774146556	7	55146626	C	T	R149W	0	0	1	1	1	0	1	4
rs587778252	7	55146674	C	T	R165W	0	1	0	1	1	0	1	4
rs1023185448	7	55202592	G	A	D1080N	0	0	0	1	1	1	1	4
rs104886026	7	55200333	G	A	D956N	0	0	0	1	1	1	1	4
rs552733360	7	55181419	G	A	E804K	0	0	0	1	1	1	1	4
rs747726185	7	55201306	G	A	G1022D	0	1	1	1	1	0	0	4
rs909797662	7	55191837	G	A	G863D	0	0	0	1	1	1	1	4
rs759532524	7	55146627	G	A	R149Q	0	0	1	1	1	0	1	4
rs759106015	7	55152588	G	A	R224H	0	1	0	1	0	1	1	4
rs756870976	7	55173093	G	A	R677H	0	0	0	1	1	1	1	4
rs150036236	7	55191741	G	A	R831H	0	0	0	1	1	1	1	4
rs749132706	7	55155862	G	A	V308I	0	1	0	1	0	1	1	4
rs147149347	7	55181314	G	A	V769M	0	1	0	1	0	1	1	4
rs538497054	7	55198725	G	A	V904I	0	1	0	1	0	1	1	4
rs769918274	7	55163782	G	C	E561Q	0	1	0	1	0	1	1	4
rs1249939049	7	55143416	G	T	A118S	0	1	0	1	0	1	1	4
rs1057519861	7	55181398	T	A	C797S	0	1	0	1	1	1	0	4
rs757642107	7	55181410	T	C	Y801H	0	1	0	1	1	1	0	4
rs758954817	7	55173015	T	G	V651G	0	0	1	1	1	1	0	4
rs767674013	7	55181374	A	C	I789L	1	0	1	1	0	1	1	5
rs775131364	7	55200412	A	T	Q982L	1	0	1	0	1	1	1	5
rs201717672	7	55205586	C	A	A1201E	1	0	0	1	1	1	1	5
rs771418435	7	55202617	C	T	P1088L	1	0	1	1	1	0	1	5
rs771929085	7	55155941	G	A	R334H	1	0	1	1	0	1	1	5
rs770879879	7	55155875	G	C	G312A	1	0	1	1	0	1	1	5
rs777165081	7	55157665	T	A	F404I	1	0	1	1	1	0	1	5
rs1437418906	7	55155946	G	A	V336M	1	1	1	1	1	0	0	5
rs1340266257	7	55161620	C	A	N540K	1	1	1	1	1	0	0	5
rs1419611893	7	55163747	T	C	F549S	1	1	1	1	1	0	0	5
rs751667358	7	55154152	C	T	R297C	1	1	1	1	1	0	0	5
rs761608448	7	55205455	G	C	W1157C	1	1	1	1	1	0	0	5
rs374873413	7	55181302	G	C	V765L	1	1	1	1	0	1	0	5
rs765369188	7	55157744	C	A	T430N	1	1	1	1	0	0	1	5
rs751549547	7	55192783	G	T	M881I	1	1	1	1	0	1	0	5
rs779094647	7	55155841	G	T	V301L	1	1	1	1	0	1	0	5
rs755584255	7	55161630	G	A	G544S	1	1	1	1	0	1	0	5
rs559717059	7	55174795	C	T	P753L	1	1	1	0	0	1	1	5
rs770290445	7	55146711	C	G	S177W	1	1	1	0	1	0	1	5
rs1300698331	7	55174005	A	G	K716E	1	1	1	0	0	1	1	5
rs749554270	7	55173921	C	T	L688F	1	1	0	1	0	1	1	5
rs104886013	7	55191851	G	A	E868K	1	1	0	1	0	1	1	5
rs771995749	7	55174726	T	G	L730R	1	1	0	1	1	0	1	5
rs397517101	7	55174797	A	G	K754E	1	1	0	1	0	1	1	5
rs1433831615	7	55191796	G	T	Q849H	1	1	0	1	1	1	0	5
rs397517126	7	55191746	T	G	L833V	1	1	0	1	0	1	1	5
rs1309796320	7	55143308	A	G	I82V	1	1	0	1	0	1	1	5
rs1379373864	7	55174780	G	A	R748K	1	1	0	1	0	1	1	5
rs542967903	7	55198857	G	A	V948I	1	1	0	1	0	1	1	5
rs773041247	7	55205558	G	A	A1192T	1	1	0	1	0	1	1	5
rs1340811850	7	55160210	G	A	S457N	1	1	0	1	0	1	1	5
rs121913231	7	55174794	C	T	P753S	1	1	0	1	0	1	1	5
rs368484180	7	55161552	C	T	P518S	1	1	0	1	0	1	1	5
rs201830126	7	55200330	G	A	A955T	1	1	0	1	0	1	1	5
rs957617087	7	55171197	G	A	G635S	1	1	0	1	1	0	1	5
rs767507216	7	55198792	T	C	I926T	1	1	0	1	0	1	1	5
rs397517085	7	55173985	A	C	E709A	1	1	0	1	0	1	1	5
rs748011710	7	55201212	A	C	S991R	1	1	1	0	1	1	0	5
rs201364864	7	55157731	A	G	I426V	1	1	0	1	0	1	1	5
rs121913433	7	55174771	A	G	K745R	1	1	1	1	0	1	0	5
rs754652044	7	55181425	A	G	K806E	1	1	1	1	0	1	0	5
rs1292517709	7	55191804	A	G	K852R	1	1	1	0	0	1	1	5
rs1289194907	7	55201234	A	G	Y998C	1	1	1	0	1	0	1	5
rs780083331	7	55174754	A	T	K739N	1	1	1	1	0	1	0	5
rs1323967615	7	55181305	A	T	M766L	1	1	1	1	0	1	0	5
rs747376358	7	55165424	A	T	N623Y	1	1	0	0	1	1	1	5
rs1338409357	7	55173107	C	A	L682M	1	1	0	1	0	1	1	5
rs121913443	7	55191821	C	A	L858M	1	1	0	1	0	1	1	5
rs751570775	7	55165323	C	A	P589H	1	1	0	1	1	0	1	5
rs370289230	7	55181389	C	A	P794T	1	1	0	1	1	0	1	5
rs1390478413	7	55198770	C	A	P919T	1	1	1	1	0	1	0	5
rs121913464	7	55174792	C	A	S752Y	1	1	1	0	0	1	1	5
rs1372330611	7	55152564	C	G	A216G	1	1	0	1	0	1	1	5
rs1220800698	7	55173977	C	G	I706M	1	1	0	1	0	1	1	5
rs367859869	7	55181472	C	G	I821M	1	1	0	1	0	1	1	5
rs757493321	7	55198838	C	G	I941M	1	1	0	1	0	1	1	5
rs772799315	7	55174018	C	G	S720C	1	1	0	1	0	1	1	5
rs778199483	7	55181313	C	G	S768R	1	1	1	0	1	1	0	5
rs1424329195	7	55181360	C	G	S784C	1	1	0	1	0	1	1	5
rs1378775962	7	55181441	C	G	S811C	1	1	0	1	0	1	1	5
rs1375731369	7	55198723	C	G	T903S	1	1	1	1	0	1	0	5
rs868676634	7	55201279	C	T	A1013V	1	1	1	1	0	1	0	5
rs779879611	7	55143339	C	T	A92V	1	1	1	0	0	1	1	5
rs1490923813	7	55201332	C	T	R1031W	1	1	1	1	0	0	1	5
rs370744986	7	55152639	C	T	T241I	1	1	1	0	0	1	1	5
rs121434569	7	55181378	C	T	T790M	1	1	1	0	0	1	1	5
rs746585833	7	55205538	G	A	G1185D	1	1	1	1	1	0	0	5
rs775695605	7	55198764	G	A	G917R	1	1	1	1	1	0	0	5
rs374873413	7	55181302	G	A	V765M	1	1	0	1	0	1	1	5
rs1260357262	7	55143350	G	A	V96M	1	1	0	1	0	1	1	5
rs1489158055	7	55191734	G	C	E829Q	1	1	1	1	0	1	0	5
rs1282801317	7	55143316	G	C	E84D	1	1	1	1	0	1	0	5
rs1009023863	7	55198717	G	C	G901A	1	1	1	1	0	1	0	5
rs763266323	7	55160184	G	C	L448F	1	1	1	1	0	1	0	5
rs1050171	7	55181370	G	C	Q787H	1	1	1	1	0	1	0	5
rs397517127	7	55191749	G	C	V834L	1	1	1	1	0	1	0	5
rs759418157	7	55181308	G	T	A767S	1	1	0	1	0	1	1	5
rs750582201	7	55201191	G	T	D984Y	1	1	1	0	1	0	1	5
rs1474170437	7	55191724	G	T	M825I	1	1	1	1	0	1	0	5
rs776050604	7	55152571	G	T	Q218H	1	1	1	1	0	1	0	5
rs1413493019	7	55181382	G	T	Q791H	1	1	1	1	0	1	0	5
rs749270913	7	55192822	G	T	Q894H	1	1	0	1	1	1	0	5
rs17337079	7	55173083	G	T	V674F	1	1	1	1	0	0	1	5
rs779015469	7	55198719	G	T	V902L	1	1	1	1	0	1	0	5
rs1218871031	7	55198734	T	A	L907M	1	1	0	1	0	1	1	5
rs752350337	7	55161607	T	C	V536A	1	1	1	1	0	1	0	5
rs727503020	7	55181320	A	G	N771D	0	0	1	1	1	1	1	5
rs1484032303	7	55155887	A	G	Y316C	0	1	1	1	1	0	1	5
rs376963968	7	55143363	C	A	P100H	0	1	1	1	1	1	0	5
rs770443325	7	55172994	C	T	P644L	0	0	1	1	1	1	1	5
rs766478921	7	55154039	C	T	T259M	0	1	1	1	0	1	1	5
rs144158123	7	55142298	C	T	T34M	0	1	1	1	0	1	1	5
rs772091823	7	55191744	G	A	R832H	0	1	0	1	1	1	1	5
rs121913229	7	55174785	G	C	A750P	0	1	0	1	1	1	1	5
rs104886013	7	55191851	G	C	E868Q	0	1	1	1	0	1	1	5
rs121913432	7	55181327	A	G	H773R	1	0	1	1	1	1	1	6
rs771396903	7	55154090	A	G	Q276R	1	0	1	1	1	1	1	6
rs749441331	7	55205561	G	A	E1193K	1	0	1	1	1	1	1	6
rs374501041	7	55202557	G	C	R1068P	1	0	1	1	1	1	1	6
rs1263793183	7	55142340	T	C	F48S	1	0	1	1	1	1	1	6
rs776875545	7	55173073	G	T	R670S	1	1	1	1	1	1	0	6
rs1427028322	7	55163740	A	G	R547G	1	1	1	1	1	1	0	6
rs751337426	7	55143464	G	A	E134K	1	1	1	1	1	0	1	6
rs780967013	7	55205393	G	A	E1137K	1	1	1	1	1	0	1	6
rs1359029869	7	55200345	A	G	K960E	1	1	1	1	1	0	1	6
rs760471492	7	55163821	C	T	R574W	1	1	1	1	1	0	1	6
rs771398183	7	55156554	G	T	G343V	1	1	1	1	1	0	1	6
rs778638117	7	55142423	C	A	L76I	1	1	1	1	0	1	1	6
rs17337451	7	55200351	C	A	R962S	1	1	1	1	0	1	1	6
rs146795390	7	55191776	G	A	V843I	1	1	1	1	0	1	1	6
rs1427460008	7	55173114	A	G	Q684R	1	1	1	1	0	1	1	6
rs1473630143	7	55205399	C	T	L1139F	1	1	1	1	0	1	1	6
rs28384375	7	55165332	T	C	V592A	1	1	1	1	0	1	1	6
rs1480173156	7	55205559	C	G	A1192G	1	1	1	1	0	1	1	6
rs764359156	7	55173002	G	A	A647T	1	1	1	1	0	1	1	6
rs956455215	7	55192781	A	G	M881V	1	1	1	1	0	1	1	6
rs149248025	7	55201237	G	T	R999L	1	1	1	1	0	1	1	6
rs1190573231	7	55152563	G	A	A216T	1	1	1	1	0	1	1	6
rs1445729019	7	55205391	C	T	P1136L	1	1	1	1	0	1	1	6
rs751632602	7	55200355	A	G	E963G	1	1	1	1	0	1	1	6
rs121913427	7	55174773	G	A	E746K	1	1	1	1	0	1	1	6
rs1040130291	7	55152621	A	G	Q235R	1	1	1	1	0	1	1	6
rs961150162	7	55198779	G	A	E922K	1	1	1	1	0	1	1	6
rs762672864	7	55181365	G	A	V786M	1	1	1	1	0	1	1	6
rs1057520037	7	55174782	G	C	E749Q	1	1	1	1	0	1	1	6
rs397517084	7	55173976	T	C	I706T	1	1	1	1	0	1	1	6
rs144496976	7	55200352	G	A	R962H	1	1	0	1	1	1	1	6
rs989939484	7	55165319	G	A	G588S	1	1	0	1	1	1	1	6
rs745812480	7	55191743	C	T	R832C	1	1	0	1	1	1	1	6
rs1203302510	7	55198762	A	G	D916G	1	1	0	1	1	1	1	6
rs397517085	7	55173985	A	G	E709G	1	1	1	1	0	1	1	6
rs761470472	7	55174810	A	G	E758G	1	1	1	1	0	1	1	6
rs918327720	7	55192776	A	G	K879R	1	1	1	1	0	1	1	6
rs779164024	7	55198848	A	G	M945V	1	1	0	1	1	1	1	6
rs1003269794	7	55191773	A	G	N842D	1	1	1	1	0	1	1	6
rs1468532072	7	55192814	A	G	T892A	1	1	1	1	0	1	1	6
rs753612121	7	55198833	A	G	T940A	1	1	1	1	0	1	1	6
rs1295285127	7	55143438	A	G	Y125C	1	1	1	1	1	0	1	6
rs138240620	7	55174039	A	G	Y727C	1	1	1	1	1	1	0	6
rs1440961719	7	55191855	A	G	Y869C	1	1	1	0	1	1	1	6
rs765137528	7	55143327	A	G	Y88C	1	1	1	0	1	1	1	6
rs987884612	7	55192812	A	G	Y891C	1	1	1	0	1	1	1	6
rs397517085	7	55173985	A	T	E709V	1	1	1	0	1	1	1	6
rs397517132	7	55191846	A	T	E866V	1	1	1	0	1	1	1	6
rs773998239	7	55198780	A	T	E922V	1	1	1	0	1	1	1	6
rs397517128	7	55191753	A	T	H835L	1	1	1	0	1	1	1	6
rs397517130	7	55191829	A	T	K860N	1	1	1	1	1	1	0	6
rs895496054	7	55157692	A	T	N413Y	1	1	1	1	1	0	1	6
rs150749913	7	55191729	A	T	Y827F	1	1	1	1	0	1	1	6
rs376176117	7	55192839	A	T	Y900F	1	1	1	1	0	1	1	6
rs147732025	7	55160278	C	A	L480M	1	1	1	1	0	1	1	6
rs752616839	7	55152600	C	A	P228H	1	1	1	1	0	1	1	6
rs748627278	7	55154057	C	A	P265H	1	1	1	1	0	1	1	6
rs1268199326	7	55154078	C	A	P272H	1	1	1	1	1	0	1	6
rs1168763004	7	55173930	C	A	P691T	1	1	1	1	0	1	1	6
rs148934350	7	55191792	C	A	P848Q	1	1	0	1	1	1	1	6
rs1011342626	7	55198750	C	A	S912Y	1	1	1	0	1	1	1	6
rs1247204001	7	55143417	C	G	A118G	1	1	1	1	0	1	1	6
rs768468531	7	55181328	C	G	H773Q	1	1	1	1	1	1	0	6
rs142188270	7	55205576	C	G	L1198V	1	1	1	1	0	1	1	6
rs864621996	7	55191761	C	G	L838V	1	1	1	1	0	1	1	6
rs940489358	7	55201225	C	G	S995C	1	1	1	1	0	1	1	6
rs144158123	7	55142298	C	G	T34R	1	1	1	1	0	1	1	6
rs1476693500	7	55181297	C	T	A763V	1	1	1	1	0	1	1	6
rs397517107	7	55181309	C	T	A767V	1	1	1	1	0	1	1	6
rs1345851089	7	55201290	C	T	L1017F	1	1	1	1	0	1	1	6
rs1278942267	7	55181452	C	T	L815F	1	1	1	1	0	1	1	6
rs750399097	7	55143332	C	T	L90F	1	1	1	1	0	1	1	6
rs564398642	7	55161553	C	T	P518L	1	1	1	1	0	1	1	6
rs1477025000	7	55165344	C	T	P596L	1	1	1	1	0	1	1	6
rs121913446	7	55174735	C	T	P733L	1	1	1	1	1	1	0	6
rs148934350	7	55191792	C	T	P848L	1	1	1	1	1	1	0	6
rs554981236	7	55152647	C	T	R244W	1	1	1	1	1	0	1	6
rs377567759	7	55160191	C	T	R451C	1	1	1	1	1	1	0	6
rs17337451	7	55200351	C	T	R962C	1	1	0	1	1	1	1	6
rs866928399	7	55201236	C	T	R999C	1	1	1	1	0	1	1	6
rs1424329195	7	55181360	C	T	S784F	1	1	1	0	1	1	1	6
rs397517137	7	55192794	C	T	S885L	1	1	1	0	1	1	1	6
rs1421825015	7	55198786	C	T	S924F	1	1	1	0	1	1	1	6
rs966001143	7	55154084	C	T	T274M	1	1	1	1	0	1	1	6
rs1164954595	7	55156614	C	T	T363I	1	1	1	1	0	1	1	6
rs138193597	7	55173096	C	T	T678M	1	1	1	1	0	1	1	6
rs767505234	7	55174033	C	T	T725M	1	1	0	1	1	1	1	6
rs727504316	7	55174789	C	T	T751I	1	1	1	1	0	1	1	6
rs151064287	7	55192815	C	T	T892I	1	1	1	0	1	1	1	6
rs779716935	7	55201278	G	A	A1013T	1	1	1	1	0	1	1	6
rs769696078	7	55154128	G	A	A289T	1	1	1	1	0	1	1	6
rs397517125	7	55181473	G	A	A822T	1	1	1	1	0	1	1	6
rs1314649810	7	55173122	G	A	E687K	1	1	1	1	0	1	1	6
rs1057519794	7	55173927	G	A	E690K	1	1	1	1	0	1	1	6
rs1485016142	7	55143455	G	A	G131R	1	1	1	1	1	1	0	6
rs772311777	7	55142294	G	A	G33S	1	1	1	1	0	1	1	6
rs764356379	7	55161631	G	A	G544D	1	1	1	1	1	1	0	6
rs1294381114	7	55163818	G	A	G573R	1	1	1	1	1	1	0	6
rs753315940	7	55165436	G	A	G627R	1	1	1	1	1	1	0	6
rs754426793	7	55181395	G	A	G796S	1	1	1	1	0	1	1	6
rs121913230	7	55181437	G	A	G810S	1	1	0	1	1	1	1	6
rs1057519828	7	55143387	G	A	R108K	1	1	1	1	0	1	1	6
rs751667594	7	55160192	G	A	R451H	1	1	1	1	0	1	1	6
rs1266662784	7	55173075	G	A	R671H	1	1	1	1	1	0	1	6
rs150423237	7	55173087	G	A	R675Q	1	1	1	1	0	1	1	6
rs373336251	7	55173102	G	A	R680Q	1	1	1	1	0	1	1	6
rs1263602634	7	55181417	G	A	R803Q	1	1	0	1	1	1	1	6
rs150549265	7	55154137	G	A	V292M	1	1	1	1	0	1	1	6
rs483352805	7	55174035	G	A	V726M	1	1	1	1	0	1	1	6
rs587778250	7	55174761	G	A	V742I	1	1	1	1	0	1	1	6
rs567477136	7	55181329	G	A	V774M	1	1	1	1	0	1	1	6
rs1238258563	7	55192829	G	A	V897I	1	1	1	1	0	1	1	6
rs777575581	7	55152609	G	C	C231S	1	1	1	1	1	1	0	6
rs121913427	7	55174773	G	C	E746Q	1	1	1	1	0	1	1	6
rs961150162	7	55198779	G	C	E922Q	1	1	1	1	0	1	1	6
rs1447176163	7	55152633	G	C	G239A	1	1	1	1	0	1	1	6
rs1399582136	7	55192841	G	C	G901R	1	1	1	1	1	1	0	6
rs766161581	7	55192777	G	C	K879N	1	1	1	1	1	1	0	6
rs773720036	7	55191772	G	C	R841S	1	1	1	1	1	1	0	6
rs886037891	7	55155917	G	T	C326F	1	1	1	0	1	1	1	6
rs776886714	7	55152578	G	T	G221W	1	1	1	1	1	0	1	6
rs866211550	7	55160247	G	T	L469F	1	1	1	1	1	1	0	6
rs1057519887	7	55154128	GC	A	A289N	1	1	1	1	0	1	1	6
rs1375457410	7	55198843	T	A	V943D	1	1	1	1	1	1	0	6
rs765416003	7	55146681	T	C	I167T	1	1	1	1	0	1	1	6
rs1177337471	7	55160207	T	C	I456T	1	1	1	1	0	1	1	6
rs397517092	7	55174756	T	C	I740T	1	1	1	1	0	1	1	6
rs771888227	7	55200409	T	C	I981T	1	1	1	1	0	1	1	6
rs1240855741	7	55161526	T	C	L509S	1	1	1	1	0	1	1	6
rs771995749	7	55174726	T	C	L730P	1	1	1	1	1	0	1	6
rs397517136	7	55192782	T	C	M881T	1	1	1	1	1	1	0	6
rs1431327306	7	55198738	T	C	M908T	1	1	1	1	0	1	1	6
rs781609053	7	55200379	T	C	M971T	1	1	1	1	0	1	1	6
rs762649354	7	55154138	T	C	V292A	1	1	1	1	0	1	1	6
rs1488735128	7	55174750	T	C	V738A	1	1	1	1	0	1	1	6
rs121913466	7	55174762	T	C	V742A	1	1	1	1	0	1	1	6
rs1334821010	7	55192830	T	C	V897A	1	1	1	1	0	1	1	6
rs776146284	7	55154116	T	C	Y285H	1	1	1	1	0	1	1	6
rs918710688	7	55154105	C	G	P281R	0	1	1	1	1	1	1	6
rs775252718	7	55154017	C	G	R252G	0	1	1	1	1	1	1	6
rs761920220	7	55191758	G	A	D837N	0	1	1	1	1	1	1	6
rs760228905	7	55142372	G	A	E59K	0	1	1	1	1	1	1	6
rs1249099747	7	55165281	G	A	G575E	0	1	1	1	1	1	1	6
rs1486130926	7	55200387	G	A	D974N	1	1	1	1	1	1	1	7
rs1321754240	7	55198767	A	T	I918F	1	1	1	1	1	1	1	7
rs760639592	7	55157716	G	A	E421K	1	1	1	1	1	1	1	7
rs1185470008	7	55200334	A	T	D956V	1	1	1	1	1	1	1	7
rs1302295057	7	55201284	G	A	E1015K	1	1	1	1	1	1	1	7
rs751667594	7	55160192	G	T	R451L	1	1	1	1	1	1	1	7
rs758017949	7	55156629	A	T	D368V	1	1	1	1	1	1	1	7
rs780001754	7	55152656	G	A	D247N	1	1	1	1	1	1	1	7
rs727504256	7	55173984	G	A	E709K	1	1	1	1	1	1	1	7
rs1203062307	7	55152606	A	C	D230A	1	1	1	1	1	1	1	7
rs1271051562	7	55198840	A	C	D942A	1	1	1	1	1	1	1	7
rs763572530	7	55142373	A	C	E59A	1	1	1	1	1	1	1	7
rs1458440474	7	55181369	A	C	Q787P	1	1	1	1	1	1	1	7
rs1396651256	7	55154038	A	C	T259P	1	1	1	1	1	1	1	7
rs754772262	7	55192791	A	G	E884G	1	1	1	1	1	1	1	7
rs368698152	7	55198854	A	G	M947V	1	1	1	1	1	1	1	7
rs1418675303	7	55181455	A	G	N816D	1	1	1	1	1	1	1	7
rs1057519888	7	55143386	A	G	R108G	1	1	1	1	1	1	1	7
rs779394350	7	55181411	A	G	Y801C	1	1	1	1	1	1	1	7
rs1402174871	7	55191759	A	T	D837V	1	1	1	1	1	1	1	7
rs149840192	7	55154129	C	A	A289D	1	1	1	1	1	1	1	7
rs1038116801	7	55192769	C	A	P877T	1	1	1	1	1	1	1	7
rs770443325	7	55172994	C	G	P644R	1	1	1	1	1	1	1	7
rs1444692842	7	55155865	C	G	R309G	1	1	1	1	1	1	1	7
rs748491031	7	55200384	C	G	R973G	1	1	1	1	1	1	1	7
rs866460345	7	55143362	C	T	P100S	1	1	1	1	1	1	1	7
rs1215599430	7	55200391	C	T	P975L	1	1	1	1	1	1	1	7
rs1343888047	7	55155910	C	T	R324C	1	1	1	1	1	1	1	7
rs1417155613	7	55173092	C	T	R677C	1	1	1	1	1	1	1	7
rs369399038	7	55173101	C	T	R680W	1	1	1	1	1	1	1	7
rs1275022697	7	55181335	C	T	R776C	1	1	1	1	1	1	1	7
rs1215679186	7	55181416	C	T	R803W	1	1	1	1	1	1	1	7
rs371228501	7	55191740	C	T	R831C	1	1	1	1	1	1	1	7
rs1223694747	7	55198809	C	T	R932C	1	1	1	1	1	1	1	7
rs1140476	7	55200396	C	T	R977C	1	1	1	1	1	1	1	7
rs1226827460	7	55160195	C	T	S452F	1	1	1	1	1	1	1	7
rs867740042	7	55198834	C	T	T940I	1	1	1	1	1	1	1	7
rs1057519847	7	55191821	CT	G	L858R	1	1	1	1	1	1	1	7
rs150899403	7	55165416	G	A	C620Y	1	1	1	1	1	1	1	7
rs121913418	7	55174818	G	A	D761N	1	1	1	1	1	1	1	7
rs967910623	7	55198839	G	A	D942N	1	1	1	1	1	1	1	7
rs121913420	7	55174737	G	A	E734K	1	1	1	1	1	1	1	7
rs753319070	7	55143314	G	A	E84K	1	1	1	1	1	1	1	7
rs756703787	7	55191845	G	A	E866K	1	1	1	1	1	1	1	7
rs606231253	7	55157738	G	A	G428D	1	1	1	1	1	1	1	7
rs121913428	7	55174015	G	A	G719D	1	1	1	1	1	1	1	7
rs28929495	7	55174014	G	A	G719S	1	1	1	1	1	1	1	7
rs121913430	7	55174740	G	A	G735S	1	1	1	1	1	1	1	7
rs121913431	7	55181438	G	A	G810D	1	1	1	1	1	1	1	7
rs483352808	7	55191720	G	A	G824D	1	1	1	1	1	1	1	7
rs1330512770	7	55161592	G	A	R531Q	1	1	1	1	1	1	1	7
rs483352806	7	55181336	G	A	R776H	1	1	1	1	1	1	1	7
rs146121458	7	55191756	G	A	R836H	1	1	1	1	1	1	1	7
rs756554871	7	55200385	G	A	R973Q	1	1	1	1	1	1	1	7
rs745490627	7	55200397	G	A	R977H	1	1	1	1	1	1	1	7
rs1420841957	7	55201275	G	C	D1012H	1	1	1	1	1	1	1	7
rs780001754	7	55152656	G	C	D247H	1	1	1	1	1	1	1	7
rs749927550	7	55156628	G	C	D368H	1	1	1	1	1	1	1	7
rs967910623	7	55198839	G	C	D942H	1	1	1	1	1	1	1	7
rs753319070	7	55143314	G	C	E84Q	1	1	1	1	1	1	1	7
rs145113601	7	55143390	G	C	G109A	1	1	1	1	1	1	1	7
rs139236063	7	55165350	G	C	G598A	1	1	1	1	1	1	1	7
rs121913428	7	55174015	G	C	G719A	1	1	1	1	1	1	1	7
rs28929495	7	55174014	G	C	G719R	1	1	1	1	1	1	1	7
rs745490627	7	55200397	G	C	R977P	1	1	1	1	1	1	1	7
rs1220574404	7	55154135	G	T	C291F	1	1	1	1	1	1	1	7
rs28384376	7	55165428	G	T	C624F	1	1	1	1	1	1	1	7
rs121913418	7	55174818	G	T	D761Y	1	1	1	1	1	1	1	7
rs1278838499	7	55155853	G	T	G305C	1	1	1	1	1	1	1	7
rs139236063	7	55165350	G	T	G598V	1	1	1	1	1	1	1	7
rs28929495	7	55174014	G	T	G719C	1	1	1	1	1	1	1	7
rs397517119	7	55181344	G	T	G779C	1	1	1	1	1	1	1	7
rs397517120	7	55181345	G	T	G779V	1	1	1	1	1	1	1	7
rs772091823	7	55191744	G	T	R832L	1	1	1	1	1	1	1	7
rs1351046105	7	55181413	G	T	V802F	1	1	1	1	1	1	1	7
rs397517089	7	55174729	G	T	W731L	1	1	1	1	1	1	1	7
rs1057519887	7	55154128	GC	T	A289I	1	1	1	1	1	1	1	7
rs767507216	7	55198792	T	A	I926N	1	1	1	1	1	1	1	7
rs483352807	7	55181402	T	A	L798H	1	1	1	1	1	1	1	7
rs121434568	7	55191822	T	A	L858Q	1	1	1	1	1	1	1	7
rs121913444	7	55191831	T	A	L861Q	1	1	1	1	1	1	1	7
rs142061256	7	55143333	T	A	L90H	1	1	1	1	1	1	1	7
rs1321610304	7	55155859	T	C	C307R	1	1	1	1	1	1	1	7
rs777342222	7	55155925	T	C	C329R	1	1	1	1	1	1	1	7
rs1306429085	7	55165301	T	C	C582R	1	1	1	1	1	1	1	7
rs765893589	7	55152663	T	C	L249P	1	1	1	1	1	1	1	7
rs397517097	7	55174777	T	C	L747S	1	1	1	1	1	1	1	7
rs121913444	7	55191831	T	C	L861P	1	1	1	1	1	1	1	7
rs1256743514	7	55191728	T	C	Y827H	1	1	1	1	1	1	1	7
rs756040606	7	55152608	T	G	C231G	1	1	1	1	1	1	1	7
rs1300062728	7	55173000	T	G	I646S	1	1	1	1	1	1	1	7
rs1456537863	7	55157705	T	G	L417R	1	1	1	1	1	1	1	7
rs121913444	7	55191831	T	G	L861R	1	1	1	1	1	1	1	7
rs397517096	7	55174776	TT	C	L747P	1	1	1	1	1	1	1	7
						420	417	378	672	304	447	417

## Sheet: PIK3CA
id	chrom	position	ref	alt	Mutation	SIFT	PolyPhen	SNAP2	I_MUT	PHD_SNP	Level	CGI	Score	cBio	Count
rs1328031338	3	179234212	A	G	I1019V	0	0	0	1	0	1	0	2	TCGA-B	1
rs765030404	3	179203547	A	G	I273V	0	0	0	1	0	1	0	2	TCGA-B	1
rs202013300	3	179204582	A	G	N380S	0	0	0	1	0	0	1	2	TCGA-B	1
rs755969956	3	179199773	G	A	V146I	0	0	0	1	0	0	1	2	TCGA-B	1
rs1253171657	3	179234354	C	T	A1066V	0	0	0	1	0	1	0	2	TCGA-B	3
rs1057519925	3	179210291	G	C	E453Q	0	0	0	1	0	0	1	2	TCGA-B	9
rs867262025	3	179221146	G	A	E726K	0	0	0	1	0	0	1	2	TCGA-B	121
rs988134846	3	179218321	C	G	L551V	0	1	0	1	0	1	0	3	TCGA-B	1
rs1057519932	3	179234298	T	G	H1047Q	0	0	1	1	0	1	0	3	TCGA-B	4
rs1057519940	3	179218308	G	T	Q546H	0	1	0	1	0	1	0	3	TCGA-B	6
rs1057519927	3	179218295	A	G	E542G	0	0	0	1	0	1	1	3	TCGA-B	8
rs121913275	3	179218305	G	C	E545D	0	1	0	1	0	1	0	3	TCGA-B	8
rs121913279	3	179234297	A	T	H1047L	0	0	0	0	1	1	1	3	TCGA-B	176
rs746860750	3	179199166	A	G	N114S	0	1	0	1	0	1	1	4	TCGA-B	1
rs200018596	3	179199169	G	T	R115L	0	0	0	1	1	1	1	4	TCGA-B	1
rs748197872	3	179209642	G	A	R398H	0	1	0	1	0	1	1	4	TCGA-B	3
rs1064793349	3	179203778	G	A	D350N	0	1	0	1	1	0	1	4	TCGA-B	4
rs121913273	3	179218294	G	C	E542Q	0	1	0	1	0	1	1	4	TCGA-B	9
rs104886003	3	179218303	G	C	E545Q	0	1	0	1	0	1	1	4	TCGA-B	9
rs1057519936	3	179234284	A	G	M1043V	0	0	1	1	0	1	1	4	TCGA-B	10
rs121913285	3	179218286	C	G	P539R	1	1	0	1	0	0	1	4	TCGA-B	16
rs121913287	3	179199088	G	A	R88Q	0	1	0	1	0	1	1	4	TCGA-B	21
rs121913277	3	179234302	G	C	G1049R	0	0	0	1	1	1	1	4	TCGA-B	32
rs121913286	3	179218306	C	A	Q546K	1	1	0	0	0	1	1	4	TCGA-B	33
rs121913283	3	179234286	G	A	M1043I	0	0	1	1	1	1	0	4	TCGA-B	33
rs1057519925	3	179210291	G	A	E453K	0	1	0	1	1	0	1	4	TCGA-B	54
rs121913272	3	179210192	T	C	C420R	0	1	0	1	1	0	1	4	TCGA-B	79
rs121913277	3	179234302	G	A	G1049S	0	1	0	1	1	1	1	5	TCGA-B	1
rs1057519927	3	179218295	A	C	E542A	1	1	0	1	0	1	1	5	TCGA-B	2
rs1057519927	3	179218295	A	T	E542V	1	1	0	0	1	1	1	5	TCGA-B	2
rs1057519872	3	179210438	C	T	P471L	1	1	0	1	0	1	1	5	TCGA-B	3
rs1064793663	3	179199103	G	A	R93Q	1	1	0	1	0	1	1	5	TCGA-B	4
rs121913288	3	179234219	A	G	Y1021C	1	1	0	0	1	1	1	5	TCGA-B	4
rs397517199	3	179210186	G	A	E418K	0	1	0	1	1	1	1	5	TCGA-B	8
rs397517202	3	179234230	A	G	T1025A	1	0	1	1	0	1	1	5	TCGA-B	10
rs1064793732	3	179204536	G	A	E365K	1	0	0	1	1	1	1	5	TCGA-B	11
rs121913274	3	179218304	A	C	E545A	1	1	0	1	0	1	1	5	TCGA-B	30
rs587777790	3	179199690	G	A	G118D	0	1	1	1	1	1	0	5	TCGA-B	42
rs397517201	3	179218307	A	G	Q546R	1	1	0	1	0	1	1	5	TCGA-B	49
rs121913273	3	179218294	G	A	E542K	1	1	0	1	0	1	1	5	TCGA-B	476
rs121913279	3	179234297	A	G	H1047R	0	0	1	1	1	1	1	5	TCGA-B	1504
rs587776932	3	179230077	G	A	G914R	1	1	1	1	1	1	0	6	TCGA-B	3
rs1057519938	3	179203764	A	C	N345T	1	1	1	0	1	1	1	6	TCGA-B	4
rs1057519938	3	179203764	A	T	N345I	1	1	1	0	1	1	1	6	TCGA-B	5
rs1057519930	3	179199142	G	T	G106V	1	1	0	1	1	1	1	6	TCGA-B	5
rs1057519931	3	179199141	G	C	G106R	1	1	0	1	1	1	1	6	TCGA-B	6
rs1057519942	3	179203760	G	A	V344M	1	1	1	1	0	1	1	6	TCGA-B	8
rs1057519934	3	179199158	G	C	K111N	1	1	1	1	1	1	0	6	TCGA-B	8
rs863225060	3	179199136	C	T	P104L	1	1	0	1	1	1	1	6	TCGA-B	9
rs886042002	3	179199148	G	A	R108H	1	1	0	1	1	1	1	6	TCGA-B	14
rs121913274	3	179218304	A	G	E545G	1	1	1	1	0	1	1	6	TCGA-B	16
rs397517201	3	179218307	A	C	Q546P	1	1	0	1	1	1	1	6	TCGA-B	22
rs1057519933	3	179199156	A	G	K111E	1	1	1	1	0	1	1	6	TCGA-B	22
rs121913284	3	179203765	T	A	N345K	1	1	1	1	1	1	0	6	TCGA-B	227
rs104886003	3	179218303	G	A	E545K	1	1	1	1	0	1	1	6	TCGA-B	802
rs1249433928	3	179204503	A	T	I354F	1	1	1	1	1	1	1	7	TCGA-B	1
rs1057519941	3	179203761	T	G	V344G	1	1	1	1	1	1	1	7	TCGA-B	2
rs1057519939	3	179203763	A	C	N345H	1	1	1	1	1	1	1	7	TCGA-B	3
rs1057519929	3	179199066	G	A	E81K	1	1	1	1	1	1	1	7	TCGA-B	23
rs1425290574	3	179219704	A	G	K627R	0	0	0	0	0	0	0	0
rs1454761759	3	179229433	A	G	K886R	0	0	0	0	0	0	0	0
rs1320955347	3	179203580	A	G	N284D	0	0	0	0	0	0	0	0
rs71310379	3	179199003	C	A	Q60K	0	0	0	0	0	0	0	0
rs1355632857	3	179224168	C	T	H759Y	0	0	0	0	0	0	0	0
rs1430749145	3	179210471	G	A	S482N	0	0	0	0	0	0	0	0
rs181194055	3	179224091	A	G	K733R	1	0	0	0	0	0	0	1
rs1060500031	3	179199152	A	C	E109D	0	0	0	1	0	0	0	1
rs758050864	3	179219220	A	C	E563D	0	0	0	1	0	0	0	1
rs1410357074	3	179199898	A	C	K187N	0	0	0	1	0	0	0	1
rs1203909224	3	179203703	A	C	K325Q	0	0	0	1	0	0	0	1
rs1387024511	3	179218264	A	C	K532Q	0	0	0	1	0	0	0	1
rs1423200481	3	179218239	A	C	L523F	0	0	0	1	0	0	0	1
rs1341976696	3	179203559	A	G	I277V	0	0	0	1	0	0	0	1
rs201238717	3	179203661	A	G	I311V	0	0	0	1	0	0	0	1
rs1466575763	3	179218270	A	G	I534V	0	0	0	1	0	0	0	1
rs1356168549	3	179224767	A	G	I788V	0	0	0	1	0	0	0	1
rs17849078	3	179230004	A	G	I889M	0	0	0	1	0	0	0	1
rs59971989	3	179218252	A	G	K528E	0	0	0	1	0	0	0	1
rs1395235750	3	179229427	A	G	K884R	0	0	0	0	0	0	1	1
rs778808375	3	179199725	A	G	M130V	0	0	0	1	0	0	0	1
rs1460491333	3	179203562	A	G	M278V	0	0	0	1	0	0	0	1
rs751662352	3	179201362	A	G	N212S	0	0	0	1	0	0	0	1
rs1405680411	3	179226009	A	G	N822D	0	0	0	0	0	0	1	1
rs1057519926	3	179210293	A	T	E453D	0	0	0	1	0	0	0	1
rs750030185	3	179201519	A	T	K264N	0	0	0	1	0	0	0	1
rs1386556878	3	179203667	A	T	T313S	0	0	0	1	0	0	0	1
rs199747934	3	179210554	C	A	H510N	0	0	0	1	0	0	0	1
rs1428379257	3	179203745	C	A	L339I	0	0	0	1	0	0	0	1
rs1356990190	3	179230022	C	G	D895E	0	0	0	0	0	1	0	1
rs781473521	3	179198886	C	G	L21V	0	0	0	1	0	0	0	1
rs1485993106	3	179224701	C	G	L766V	0	0	0	1	0	0	0	1
rs777154955	3	179199860	C	G	P175A	0	0	0	1	0	0	0	1
rs372610277	3	179201350	C	G	T208S	0	0	0	1	0	0	0	1
rs759611407	3	179203728	C	T	A333V	0	0	0	1	0	0	0	1
rs758563093	3	179199875	C	T	H180Y	0	1	0	0	0	0	0	1
rs201705993	3	179199803	C	T	L156F	0	0	0	1	0	0	0	1
rs1178810605	3	179198877	C	T	P18S	0	0	0	1	0	0	0	1
rs199605762	3	179203684	G	A	M318I	0	0	0	1	0	0	0	1
rs866824713	3	179221061	G	A	M697I	0	0	0	1	0	0	0	1
rs773463702	3	179224089	G	A	M732I	0	0	0	1	0	0	0	1
rs369697984	3	179234106	G	A	M983I	0	0	0	1	0	0	0	1
rs587777794	3	179204588	G	A	R382K	0	0	0	1	0	0	0	1
rs750214356	3	179203554	G	A	S275N	0	0	0	1	0	0	0	1
rs1369948803	3	179210468	G	A	S481N	0	0	0	0	0	0	1	1
rs774616938	3	179203715	G	A	V329I	0	0	0	1	0	0	0	1
rs768049386	3	179210497	G	A	V491M	0	0	0	1	0	0	0	1
rs910287504	3	179201373	G	C	V216L	0	0	0	1	0	0	0	1
rs1408408816	3	179224110	G	T	M739I	0	0	0	1	0	0	0	1
rs201269904	3	179199036	G	T	V71L	0	1	0	0	0	0	0	1
rs751557352	3	179210527	T	A	S501T	0	0	0	1	0	0	0	1
rs1197175410	3	179203563	T	C	M278T	0	0	0	1	0	0	0	1
rs1231592354	3	179203683	T	C	M318T	0	0	0	1	0	0	0	1
rs1304992271	3	179224127	T	C	M745T	0	0	0	1	0	0	0	1
rs1236123346	3	179201374	T	C	V216A	0	0	0	1	0	0	0	1
rs766847142	3	179224100	T	C	V736A	0	0	0	1	0	0	0	1
rs776203240	3	179199830	T	C	Y165H	0	0	0	1	0	0	0	1
rs748089627	3	179234292	T	G	D1045E	0	0	0	0	0	1	0	1
rs768265254	3	179198966	T	G	H47Q	0	0	0	1	0	0	0	1
rs557949672	3	179210502	T	G	I492M	0	0	0	1	0	0	0	1
rs764493325	3	179199854	T	G	S173A	0	0	0	1	0	0	0	1
rs1456514123	3	179199024	T	G	S67A	0	0	0	1	0	0	0	1
rs1426596111	3	179203614	C	T	S295F	1	0	0	0	1	0	0	2
rs1326663311	3	179199733	A	C	K132N	1	1	0	0	0	0	0	2
rs1057519928	3	179221147	A	C	E726A	0	0	0	1	0	0	1	2
rs1475475326	3	179210510	A	C	H495P	0	0	0	0	1	0	1	2
rs121913282	3	179221072	A	C	H701P	0	0	0	0	1	0	1	2
rs1417939490	3	179219586	A	C	K588Q	0	0	0	1	0	0	1	2
rs199563773	3	179210515	A	C	N497H	0	0	0	1	0	0	1	2
rs1362905343	3	179201441	A	C	Q238H	0	1	0	1	0	0	0	2
rs772678298	3	179199014	A	C	Q63H	0	1	0	1	0	0	0	2
rs943131817	3	179201395	A	G	E223G	0	0	0	1	0	0	1	2
rs2230461	3	179209622	A	G	I391M	0	0	0	1	0	1	0	2
rs943535452	3	179210213	A	G	I427V	0	0	0	1	0	1	0	2
rs199892244	3	179198958	A	G	I45V	0	0	0	1	0	1	0	2
rs748411676	3	179230017	A	G	I894V	0	0	0	1	0	1	0	2
rs1289478729	3	179198913	A	G	M30V	0	0	0	1	0	1	0	2
rs1427967136	3	179210255	A	G	M441V	0	0	0	1	0	0	1	2
rs1395991996	3	179224108	A	G	M739V	0	0	0	1	0	0	1	2
rs1064793838	3	179234288	A	G	N1044S	0	0	0	1	0	0	1	2
rs1404174283	3	179210265	A	G	N444S	0	0	0	1	0	0	1	2
rs1022964484	3	179224180	A	G	N763D	0	0	0	1	0	0	1	2
rs1245520052	3	179234144	A	G	N996S	0	0	0	1	0	0	1	2
rs1467298802	3	179221015	A	G	Q682R	0	0	0	1	0	0	1	2
rs1480850406	3	179203754	A	G	T342A	0	0	0	1	0	0	1	2
rs761264437	3	179199837	A	G	Y167C	0	1	1	0	0	0	0	2
rs1431315886	3	179199882	A	G	Y182C	0	0	0	0	1	0	1	2
rs767117813	3	179204538	A	T	E365D	0	0	0	1	0	1	0	2
rs769406397	3	179210434	A	T	T470S	0	0	0	1	0	1	0	2
rs1397152286	3	179221042	A	T	Y691F	0	0	0	1	0	1	0	2
rs1297000505	3	179203676	C	A	P316T	0	0	0	1	1	0	0	2
rs902302454	3	179224117	C	A	P742T	0	0	0	1	1	0	0	2
rs199700225	3	179221013	C	A	S681R	0	0	0	0	1	1	0	2
rs1195745994	3	179229315	C	G	L847V	0	0	0	1	0	1	0	2
rs763090975	3	179201325	C	G	P200A	0	0	0	1	1	0	0	2
rs121913286	3	179218306	C	G	Q546E	0	0	0	0	0	1	1	2
rs892699659	3	179229399	C	T	H875Y	0	0	1	0	0	1	0	2
rs1260908401	3	179203565	C	T	L279F	0	0	0	1	0	0	1	2
rs750545881	3	179199737	C	T	P134S	0	0	0	1	1	0	0	2
rs770642656	3	179199812	C	T	P159S	0	0	0	1	1	0	0	2
rs1175225456	3	179199861	C	T	P175L	0	0	0	1	0	0	1	2
rs1461675237	3	179224761	C	T	P786S	0	0	0	1	1	0	0	2
rs200619412	3	179199759	G	A	R141K	0	0	0	1	0	0	1	2
rs1220116506	3	179210531	G	A	R502Q	0	0	0	1	0	0	1	2
rs767744576	3	179224115	G	A	R741Q	0	0	0	1	0	1	0	2
rs1433512757	3	179199788	G	A	V151M	0	0	0	1	0	0	1	2
rs541134560	3	179201313	G	A	V196I	0	0	0	1	0	0	1	2
rs201946684	3	179210276	G	A	V448I	0	0	0	1	0	0	1	2
rs991307659	3	179210473	G	A	V483M	0	0	0	1	0	0	1	2
rs201269904	3	179199036	G	A	V71I	0	0	0	1	0	0	1	2
rs1263777602	3	179209681	G	C	G411A	0	0	0	1	0	0	1	2
rs751930632	3	179198870	G	C	L15F	0	1	0	1	0	0	0	2
rs772020209	3	179210243	G	C	V437L	0	0	0	1	0	1	0	2
rs1004909638	3	179210476	G	T	V484L	0	0	0	1	0	1	0	2
rs1051407	3	179203726	T	A	S332R	0	0	0	1	1	0	0	2
rs756890248	3	179229306	T	C	C844R	0	0	0	1	1	0	0	2
rs186076493	3	179210464	T	C	F480L	0	0	1	1	0	0	0	2
rs746773689	3	179210256	T	C	M441T	0	0	0	1	0	0	1	2
rs1260684206	3	179210534	A	G	E503G	1	0	0	1	0	0	1	3
rs1431864326	3	179199019	A	C	E65A	0	1	0	1	0	0	1	3
rs751095740	3	179219721	A	C	I633L	0	0	0	1	0	1	1	3
rs755641133	3	179204551	A	C	N370H	0	1	0	1	0	0	1	3
rs1060500028	3	179219590	A	G	D589G	0	0	0	1	1	0	1	3
rs762499952	3	179199016	A	G	D64G	0	0	1	1	0	0	1	3
rs778573303	3	179201515	A	G	E263G	0	0	0	1	1	1	0	3
rs190372148	3	179198965	A	G	H47R	0	0	0	1	1	0	1	3
rs200694869	3	179219601	A	G	I593V	0	0	0	1	0	1	1	3
rs1160097862	3	179229345	A	G	I857V	0	0	0	1	0	1	1	3
rs773111475	3	179219685	A	G	K621E	0	0	1	1	0	0	1	3
rs41273621	3	179221155	A	G	K729E	0	1	1	0	0	0	1	3
rs372316575	3	179210334	A	G	N467S	0	0	0	1	0	1	1	3
rs754839215	3	179199747	A	G	Q137R	0	1	0	1	0	0	1	3
rs777901394	3	179210231	A	G	T433A	0	0	1	1	0	0	1	3
rs1242912405	3	179210318	A	G	T462A	0	0	1	1	0	0	1	3
rs762727422	3	179219694	A	G	T624A	0	1	0	1	0	1	0	3
rs751673551	3	179209624	A	G	Y392C	0	1	0	1	1	0	0	3
rs369950390	3	179210549	A	G	Y508C	0	0	1	1	1	0	0	3
rs1264814442	3	179219689	A	G	Y622C	0	1	0	1	1	0	0	3
rs1038836238	3	179209699	A	T	E417V	0	1	0	0	1	0	1	3
rs1411811692	3	179229353	A	T	Q859H	0	1	0	1	0	1	0	3
rs1175399043	3	179220018	C	G	Q661E	0	0	1	1	0	1	0	3
rs1160295534	3	179234137	C	T	H994Y	0	1	0	0	1	1	0	3
rs1405694312	3	179203643	C	T	P305S	0	1	0	1	0	0	1	3
rs1405237410	3	179204572	C	T	P377S	0	0	0	1	1	0	1	3
rs573490174	3	179210273	C	T	P447S	0	1	0	1	0	1	0	3
rs745847400	3	179210238	C	T	T435I	0	0	0	1	1	0	1	3
rs1454137650	3	179229403	C	T	T876I	0	0	1	1	0	1	0	3
rs752782033	3	179224132	G	A	A747T	0	0	0	1	0	1	1	3
rs1057519699	3	179218315	G	A	D549N	0	1	0	1	0	0	1	3
rs1430412182	3	179224797	G	A	E798K	0	0	0	1	1	0	1	3
rs1436163100	3	179210540	G	A	G505E	0	0	0	1	1	0	1	3
rs199943173	3	179229331	G	A	R852Q	0	0	0	1	1	0	1	3
rs772020209	3	179210243	G	A	V437I	0	0	0	1	0	1	1	3
rs759150318	3	179221008	G	A	V680I	0	0	0	1	0	1	1	3
rs200951754	3	179210258	G	C	A442P	0	1	0	0	1	0	1	3
rs200404201	3	179221050	G	T	A694S	0	0	0	1	0	1	1	3
rs749956691	3	179198836	G	T	R4L	0	0	0	1	0	1	1	3
rs1271146910	3	179210520	G	T	W498C	0	0	1	1	1	0	0	3
rs1442481831	3	179203635	T	C	F302S	0	1	0	1	1	0	0	3
rs781155625	3	179199766	T	G	I143M	0	1	0	1	0	1	0	3
rs1480626654	3	179199001	A	C	H59P	1	0	1	0	1	0	1	4
rs1432290091	3	179199090	C	T	L89F	1	0	0	1	0	1	1	4
rs1248066956	3	179219596	C	T	P591L	1	0	1	0	1	0	1	4
rs748316866	3	179198889	G	A	V22I	1	0	0	1	0	1	1	4
rs1131680	3	179203766	G	C	V346L	1	0	1	1	0	1	0	4
rs772628045	3	179210458	G	T	D478Y	1	0	1	0	1	0	1	4
rs778184105	3	179199098	C	A	D91E	1	1	1	0	0	1	0	4
rs754404652	3	179221051	C	T	A694V	1	1	0	0	0	1	1	4
rs887627133	3	179220995	G	A	M675I	1	1	0	1	0	1	0	4
rs773550451	3	179201318	A	G	I197M	1	1	0	1	0	0	1	4
rs934216391	3	179201431	C	G	S235C	1	1	0	1	0	0	1	4
rs1475987837	3	179199831	A	C	Y165S	0	1	1	1	0	0	1	4
rs371727887	3	179199698	A	G	I121V	0	0	1	1	0	1	1	4
rs200131834	3	179201341	A	G	Q205R	0	1	1	1	0	0	1	4
rs745427569	3	179199821	A	G	R162G	0	0	1	1	1	1	0	4
rs1225779973	3	179198946	A	G	T41A	0	0	1	1	0	1	1	4
rs397517201	3	179218307	A	T	Q546L	0	1	0	0	1	1	1	4
rs199926184	3	179226030	C	A	L829I	0	1	0	1	0	1	1	4
rs113613074	3	179204573	C	G	P377R	0	1	0	1	1	0	1	4
rs1003780665	3	179224162	C	T	P757S	0	1	1	1	0	1	0	4
rs397514565	3	179204576	G	A	C378Y	0	0	1	1	1	0	1	4
rs1303751906	3	179219697	G	A	D625N	0	1	0	1	0	1	1	4
rs587777792	3	179201379	G	A	E218K	0	0	1	1	1	0	1	4
rs766896653	3	179199018	G	A	E65K	0	1	0	1	1	0	1	4
rs749956691	3	179198836	G	A	R4Q	0	1	0	1	0	1	1	4
rs779700339	3	179219261	G	A	R577K	0	1	0	1	0	1	1	4
rs749840319	3	179224714	G	A	R770Q	0	0	1	1	0	1	1	4
rs587777793	3	179204509	G	A	V356I	0	1	0	1	0	1	1	4
rs1261422976	3	179220992	G	C	E674D	0	1	1	1	0	1	0	4
rs1448660730	3	179234176	G	T	G1007C	0	1	0	0	1	1	1	4
rs779205139	3	179204583	T	A	N380K	0	1	1	1	1	0	0	4
rs121913272	3	179210192	T	G	C420G	0	1	0	1	1	0	1	4
rs1407807826	3	179201500	A	G	D258G	1	0	1	1	1	0	1	5
rs1334051055	3	179219686	A	T	K621I	1	0	1	1	1	0	1	5
rs761766361	3	179203770	A	T	N347I	1	0	1	0	1	1	1	5
rs758563093	3	179199875	C	G	H180D	1	0	1	1	1	0	1	5
rs371049193	3	179225998	G	A	R818H	1	0	1	1	1	0	1	5
rs771524333	3	179224736	G	C	R777S	1	0	1	1	1	1	0	5
rs371049193	3	179225998	G	T	R818L	1	0	1	1	1	0	1	5
rs1323640980	3	179201509	T	A	F261Y	1	0	1	1	0	1	1	5
rs1064797300	3	179198973	T	C	F50L	1	0	1	1	1	1	0	5
rs1223709697	3	179199765	T	C	I143T	1	0	1	1	1	1	0	5
rs1227389466	3	179203548	T	C	I273T	1	0	1	1	0	1	1	5
rs989785573	3	179209621	T	C	I391T	1	0	1	1	0	1	1	5
rs1057519937	3	179234285	T	C	M1043T	1	0	1	1	0	1	1	5
rs1272870037	3	179234105	T	A	M983K	1	1	1	1	1	0	0	5
rs959926480	3	179210451	G	T	L475F	1	1	1	1	0	1	0	5
rs1434775922	3	179229426	A	G	K884E	1	1	1	1	0	0	1	5
rs1302938521	3	179218250	A	G	D527G	1	1	1	1	0	0	1	5
rs3908109	3	179219700	G	A	D626N	1	1	1	1	0	0	1	5
rs1258808931	3	179219949	G	A	V638I	1	1	1	0	0	1	1	5
rs745884068	3	179219648	T	A	D608E	1	1	1	0	1	1	0	5
rs150606403	3	179203551	G	A	R274K	1	1	0	1	0	1	1	5
rs778096620	3	179219616	G	A	A598T	1	1	0	1	0	1	1	5
rs1360085333	3	179225985	C	G	L814V	1	1	0	1	0	1	1	5
rs1242872065	3	179224183	C	G	L764V	1	1	0	1	0	1	1	5
rs996189594	3	179219227	C	T	P566S	1	1	0	1	0	1	1	5
rs1022286541	3	179219245	G	A	V572I	1	1	0	1	0	1	1	5
rs1057519935	3	179199157	A	G	K111R	1	1	0	1	0	1	1	5
rs1182102297	3	179201309	C	G	I194M	1	1	1	1	0	0	1	5
rs1347509342	3	179229431	C	G	N885K	1	1	0	1	1	1	0	5
rs1242945375	3	179234261	C	T	A1035V	1	1	0	1	0	1	1	5
rs1368278109	3	179209648	C	T	A400V	1	1	1	0	0	1	1	5
rs1416078027	3	179219706	C	T	L628F	1	1	0	1	0	1	1	5
rs780572147	3	179203658	C	T	R310C	1	1	1	0	1	0	1	5
rs1060500032	3	179201491	G	A	C255Y	1	1	1	0	1	0	1	5
rs104886000	3	179218334	G	A	R555K	1	1	1	1	0	1	0	5
rs1476951881	3	179220994	T	C	M675T	1	1	0	1	0	1	1	5
rs373295359	3	179234138	A	G	H994R	0	1	0	1	1	1	1	5
rs1482313267	3	179201415	C	G	R230G	0	1	1	1	1	0	1	5
rs758142827	3	179201523	C	T	P266S	0	1	0	1	1	1	1	5
rs752056112	3	179230366	G	A	E976K	0	0	1	1	1	1	1	5
rs1365628884	3	179226040	G	A	R832Q	0	1	1	1	1	1	0	5
rs767952819	3	179234116	G	T	A987S	0	1	1	1	0	1	1	5
rs776503460	3	179219673	C	T	R617W	1	1	1	1	1	0	1	6
rs863225460	3	179199160	T	A	I112N	1	1	1	1	1	0	1	6
rs1235701540	3	179203713	G	C	W328S	1	1	1	1	1	0	1	6
rs1057519941	3	179203761	T	C	V344A	1	1	1	1	0	1	1	6
rs121913274	3	179218304	A	T	E545V	1	1	1	0	1	1	1	6
rs754044428	3	179199701	G	A	G122S	1	1	0	1	1	1	1	6
rs3729687	3	179221089	G	A	E707K	1	1	0	1	1	1	1	6
rs985791383	3	179230029	A	G	T898A	1	1	1	1	0	1	1	6
rs765898315	3	179219716	A	G	Y631C	1	1	1	0	1	1	1	6
rs1365836230	3	179210240	C	G	L436V	1	1	1	1	0	1	1	6
rs753064641	3	179234117	C	T	A987V	1	1	1	1	0	1	1	6
rs1470180843	3	179198875	C	T	P17L	1	1	1	1	1	0	1	6
rs1060500029	3	179221047	C	T	R693C	1	1	0	1	1	1	1	6
rs1448523337	3	179230041	G	A	A902T	1	1	1	1	0	1	1	6
rs778888233	3	179234182	G	A	G1009R	1	1	1	1	1	1	0	6
rs1463675604	3	179226027	G	A	G828S	1	1	0	1	1	1	1	6
rs1336500564	3	179221048	G	A	R693H	1	1	1	1	0	1	1	6
rs780837825	3	179225968	G	A	R808Q	1	1	1	1	0	1	1	6
rs140888424	3	179199108	T	C	F95L	1	1	1	1	1	1	0	6
rs748139041	3	179220025	T	C	I663T	1	1	1	1	0	1	1	6
rs776202229	3	179210270	T	C	W446R	1	1	1	1	1	1	0	6
rs17849072	3	179219967	T	C	Y644H	1	1	1	1	0	1	1	6
rs200765393	3	179201533	A	G	Q269R	0	1	1	1	1	1	1	6
rs865861691	3	179204516	C	A	T358K	1	1	1	1	1	1	1	7
rs756193341	3	179210214	T	A	I427K	1	1	1	1	1	1	1	7
rs778550145	3	179229322	A	G	E849G	1	1	1	1	1	1	1	7
rs1397054832	3	179204528	A	G	H362R	1	1	1	1	1	1	1	7
rs1064795304	3	179230095	A	G	N920D	1	1	1	1	1	1	1	7
rs749415085	3	179198937	C	A	R38S	1	1	1	1	1	1	1	7
rs781381096	3	179209638	C	G	P397A	1	1	1	1	1	1	1	7
rs749415085	3	179198937	C	G	R38G	1	1	1	1	1	1	1	7
rs1223886939	3	179201376	C	T	P217S	1	1	1	1	1	1	1	7
rs1278986760	3	179210280	C	T	P449L	1	1	1	1	1	1	1	7
rs749415085	3	179198937	C	T	R38C	1	1	1	1	1	1	1	7
rs1401795892	3	179209641	C	T	R398C	1	1	1	1	1	1	1	7
rs200671228	3	179225967	C	T	R808W	1	1	1	1	1	1	1	7
rs1216178660	3	179230032	C	T	R899C	1	1	1	1	1	1	1	7
rs587777791	3	179199740	G	A	E135K	1	1	1	1	1	1	1	7
rs1371836681	3	179229321	G	A	E849K	1	1	1	1	1	1	1	7
rs1382877640	3	179199756	G	A	R140Q	1	1	1	1	1	1	1	7
rs772110575	3	179198938	G	A	R38H	1	1	1	1	1	1	1	7
rs1164194300	3	179201494	G	C	G256A	1	1	1	1	1	1	1	7
rs759188876	3	179204531	G	T	G363V	1	1	1	1	1	1	1	7
rs772110575	3	179198938	G	T	R38L	1	1	1	1	1	1	1	7
rs777956032	3	179198931	T	C	C36R	1	1	1	1	1	1	1	7
rs1260738276	3	179198974	T	G	F50C	1	1	1	1	1	1	1	7
rs1261983174	3	179224807	T	G	F801C	1	1	1	1	1	1	1	7
rs150075806	3	179199175	T	G	I117S	1	1	1	1	1	1	1	7
rs1221372660	3	179229310	T	G	V845G	1	1	1	1	1	1	1	7
						130	164	123	297	130	181	210

## Sheet: PTEN
id	chrom	position	ref	alt	Mutation	SIFT	PolyPhen	SNAP2	I_MUT	PHD_SNP	Level	CGI	Score	cBio	Count
rs202004587	10	87931071	G	A	A79T	0	0	0	1	0	0	0	1	TCGA-B	1
rs1221700050	10	87957880	A	G	K221R	0	1	0	1	0	0	0	2	TCGA-B	1
rs587782360	10	87933162	A	G	I135V	0	1	0	1	0	1	0	3	TCGA-B	2
rs779530981	10	87933035	C	A	D92E	1	1	1	0	0	1	0	4	TCGA-B	3
rs1064794096	10	87864514	A	C	R15S	1	0	1	1	1	1	0	5	TCGA-B	1
rs797044910	10	87864540	A	G	D24G	1	0	1	1	1	1	0	5	TCGA-B	1
rs1114167676	10	87933161	G	T	M134I	1	1	1	1	0	1	0	5	TCGA-B	1
rs905615413	10	87957898	C	T	S227F	1	1	1	0	0	1	1	5	TCGA-B	2
rs886041877	10	87894025	A	G	Y27C	0	1	1	1	1	1	0	5	TCGA-B	2
rs1114167645	10	87933143	G	C	K128N	1	1	1	0	1	1	0	5	TCGA-B	4
rs1114167623	10	87933034	A	C	D92A	1	1	1	1	0	1	1	6	TCGA-B	1
rs876659443	10	87894048	A	G	M35V	1	1	1	1	0	1	1	6	TCGA-B	1
rs1060500126	10	87933223	A	G	Y155C	1	1	1	0	1	1	1	6	TCGA-B	1
rs587782343	10	87933073	G	A	C105Y	1	1	1	0	1	1	1	6	TCGA-B	1
rs398123322	10	87933139	G	A	G127E	1	1	1	0	1	1	1	6	TCGA-B	1
rs398123314	10	87961118	G	C	K342N	1	1	1	1	1	1	0	6	TCGA-B	1
rs786201995	10	87864539	G	A	D24N	1	0	1	1	1	1	1	6	TCGA-B	4
rs121909238	10	87933037	A	G	H93R	1	1	1	1	0	1	1	6	TCGA-B	5
rs786204865	10	87952137	A	G	Q171R	1	1	1	1	1	1	1	7	TCGA-B	1
rs121909222	10	87933127	A	G	H123R	1	1	1	1	1	1	1	7	TCGA-B	1
rs786204858	10	87933079	A	T	D107V	1	1	1	1	1	1	1	7	TCGA-B	1
rs786204931	10	87933126	C	T	H123Y	1	1	1	1	1	1	1	7	TCGA-B	1
rs786204859	10	87933166	G	A	C136Y	1	1	1	1	1	1	1	7	TCGA-B	1
rs1060500117	10	87957868	T	G	V217G	1	1	1	1	1	1	1	7	TCGA-B	1
rs1064793325	10	87894081	T	G	Y46D	1	1	1	1	1	1	1	7	TCGA-B	1
rs786204927	10	87933036	C	G	H93D	1	1	1	1	1	1	1	7	TCGA-B	2
rs121909218	10	87933145	G	A	G129E	1	1	1	1	1	1	1	7	TCGA-B	2
rs786204931	10	87933126	C	G	H123D	1	1	1	1	1	1	1	7	TCGA-B	3
rs121909223	10	87933129	T	G	C124G	1	1	1	1	1	1	1	7	TCGA-B	3
rs398123316	10	87925530	A	G	H61R	1	1	1	1	1	1	1	7	TCGA-B	4
rs121909224	10	87933147	C	G	R130G	1	1	1	1	1	1	1	7	TCGA-B	4
rs1114167656	10	87933136	C	T	A126V	1	1	1	1	1	1	1	7	TCGA-B	4
rs370795352	10	87933163	T	A	I135K	1	1	1	1	1	1	1	7	TCGA-B	4
rs786201044	10	87933165	T	C	C136R	1	1	1	1	1	1	1	7	TCGA-B	5
rs121909229	10	87933148	G	C	R130P	1	1	1	1	1	1	1	7	TCGA-B	6
rs121909229	10	87933148	G	A	R130Q	1	1	1	1	1	1	1	7	TCGA-B	15
rs1114167651	10	87933107	C	A	D116E	0	0	0	0	0	0	0	0
rs587782345	10	87965326	A	T	N356Y	1	0	0	0	0	0	0	1
rs1283349882	10	87965342	G	T	S361I	1	0	0	0	0	0	0	1
rs1064796017	10	87965466	A	C	K402N	0	0	0	0	0	1	0	1
rs754821870	10	87965447	A	G	Q396R	0	0	0	1	0	0	0	1
rs786203911	10	87965431	C	T	P391S	0	0	0	1	0	0	0	1
rs1171478249	10	87961033	A	C	E314A	0	0	0	1	0	0	0	1
rs1472028496	10	87965341	A	C	S361R	0	0	0	1	0	0	0	1
rs1114167660	10	87960999	A	G	I303V	0	0	0	1	0	0	0	1
rs757087471	10	87933199	A	G	K147R	0	0	0	0	0	0	1	1
rs562015640	10	87960957	A	G	K289E	0	0	0	1	0	0	0	1
rs776763121	10	87952238	A	G	M205V	0	0	0	1	0	0	0	1
rs551221430	10	87933109	A	G	N117S	0	0	0	1	0	0	0	1
rs748240670	10	87957901	A	G	N228S	0	0	0	1	0	0	0	1
rs763784377	10	87958003	A	G	N262S	0	0	0	0	0	0	1	1
rs587782345	10	87965326	A	G	N356D	0	0	0	1	0	0	0	1
rs1064793242	10	87931080	A	G	N82D	0	0	0	1	0	0	0	1
rs765416558	10	87965347	A	G	T363A	0	0	0	1	0	0	0	1
rs786204944	10	87952229	A	T	T202S	0	1	0	0	0	0	0	1
rs398123328	10	87960896	C	A	D268E	0	0	0	1	0	0	0	1
rs375709098	10	87965321	C	A	P354Q	0	0	0	1	0	0	0	1
rs876661264	10	87965329	C	A	P357T	0	0	0	1	0	0	0	1
rs750585255	10	87965348	C	A	T363N	0	0	0	1	0	0	0	1
rs777640028	10	87931069	C	A	T78N	0	0	0	1	0	0	0	1
rs375709098	10	87965321	C	G	P354R	0	0	0	1	0	0	0	1
rs1114167629	10	87933087	C	G	Q110E	0	0	0	0	0	0	1	1
rs371387815	10	87960984	C	G	Q298E	0	0	0	0	0	0	1	1
rs876658988	10	87960939	C	T	P283S	0	0	0	1	0	0	0	1
rs375709098	10	87965321	C	T	P354L	0	0	0	1	0	0	0	1
rs750585255	10	87965348	C	T	T363I	0	0	0	1	0	0	0	1
rs1175543698	10	87960973	G	A	S294N	0	0	0	1	0	0	0	1
rs745638189	10	87960997	G	A	S302N	0	0	0	1	0	0	0	1
rs587780007	10	87961006	G	A	S305N	0	0	0	1	0	0	0	1
rs876658630	10	87961041	G	A	V317I	0	0	0	1	0	0	0	1
rs758542021	10	87965353	G	A	V365I	0	0	0	1	0	0	0	1
rs587782224	10	87965365	G	A	V369I	0	0	0	1	0	0	0	1
rs746930141	10	87961011	G	C	E307Q	0	0	0	1	0	0	0	1
rs876659464	10	87965334	G	C	E358D	0	0	0	1	0	0	0	1
rs1060500130	10	87952196	G	C	V191L	0	0	0	1	0	0	0	1
rs35600253	10	87960960	G	C	V290L	0	0	0	1	0	0	0	1
rs202004587	10	87931071	G	T	A79S	0	0	0	1	0	0	0	1
rs562164491	10	87961031	G	T	K313N	0	0	0	1	0	0	0	1
rs1195369834	10	87960902	G	T	M270I	0	0	0	1	0	0	0	1
rs35979531	10	87965364	T	A	D368E	0	1	0	0	0	0	0	1
rs587781998	10	87957903	T	A	S229T	0	0	0	1	0	0	0	1
rs587781538	10	87952221	T	C	M199T	0	0	0	1	0	0	0	1
rs1185592373	10	87952239	T	C	M205T	0	0	0	1	0	0	0	1
rs876661234	10	87960961	T	C	V290A	0	0	0	1	0	0	0	1
rs876659433	10	87957891	T	C	Y225H	0	0	0	1	0	0	0	1
rs876661021	10	87965450	A	G	H397R	0	0	0	1	0	1	0	2
rs587782345	10	87965326	A	C	N356H	1	0	0	1	0	0	0	2
rs1060500109	10	87864482	A	G	I5V	1	0	0	1	0	0	0	2
rs587781895	10	87952176	A	T	N184I	1	0	0	0	1	0	0	2
rs143335584	10	87960974	T	G	S294R	1	0	0	1	0	0	0	2
rs863224665	10	87965458	A	G	I400V	0	0	0	1	0	1	0	2
rs771310592	10	87933108	A	C	N117H	0	1	0	1	0	0	0	2
rs1085308044	10	87864504	A	C	N12T	0	0	0	0	1	1	0	2
rs786204943	10	87952185	A	G	D187G	0	0	0	1	1	0	0	2
rs863224667	10	87961027	A	G	D312G	0	0	0	1	1	0	0	2
rs878853932	10	87965318	A	G	E353G	0	1	0	1	0	0	0	2
rs1474354667	10	87960930	A	G	I280V	0	0	0	1	0	1	0	2
rs1060500125	10	87957997	A	G	K260R	0	1	0	0	0	0	1	2
rs786201758	10	87957933	A	G	M239V	0	0	0	1	0	0	1	2
rs1370349057	10	87965375	A	G	N372S	0	0	0	1	0	1	0	2
rs992385562	10	87894091	A	G	N49S	0	0	0	1	0	1	0	2
rs1250521901	10	87894065	A	T	E40D	0	0	0	1	0	1	0	2
rs1164665914	10	87965351	C	A	S364Y	0	1	0	0	0	0	1	2
rs786204872	10	87958011	C	G	L265V	0	0	0	1	0	0	1	2
rs1114167639	10	87965293	C	G	L345V	0	0	0	1	0	1	0	2
rs750705904	10	87960933	C	G	P281A	0	1	0	1	0	0	0	2
rs876660906	10	87960998	C	G	S302R	0	0	0	1	1	0	0	2
rs1064794675	10	87957948	C	T	P244S	0	1	0	1	0	0	0	2
rs1064794436	10	87961014	C	T	R308C	0	0	0	1	1	0	0	2
rs1214965807	10	87957904	C	T	S229L	0	0	0	1	1	0	0	2
rs1060500121	10	87960979	G	A	C296Y	0	0	0	1	1	0	0	2
rs145124907	10	87933102	G	A	D115N	0	0	0	1	0	1	0	2
rs758644748	10	87960993	G	A	D301N	0	0	0	1	1	0	0	2
rs878853946	10	87961026	G	A	D312N	0	0	0	1	1	0	0	2
rs747072478	10	87952219	G	A	M198I	0	0	0	1	0	1	0	2
rs786201507	10	87961015	G	A	R308H	0	0	0	1	1	0	0	2
rs121909234	10	87957867	G	A	V217I	0	0	0	1	0	1	0	2
rs878853943	10	87957882	G	A	V222M	0	1	0	1	0	0	0	2
rs1410198544	10	87960915	G	A	V275I	0	0	0	1	0	1	0	2
rs786204916	10	87894105	G	A	V54I	0	1	0	1	0	0	0	2
rs9651492	10	87933216	G	C	D153H	0	0	0	1	0	0	1	2
rs864622594	10	87965335	G	T	A359S	0	1	0	1	0	0	0	2
rs876659227	10	87952174	G	T	K183N	0	0	0	1	1	0	0	2
rs878853943	10	87957882	G	T	V222L	0	1	0	1	0	0	0	2
rs587781538	10	87952221	T	A	M199K	0	0	0	1	1	0	0	2
rs786202207	10	87960978	T	C	C296R	0	0	0	1	1	0	0	2
rs786204871	10	87957934	T	C	M239T	0	0	0	1	0	0	1	2
rs17849090	10	87957941	T	G	F241L	0	0	0	1	1	0	0	2
rs772018727	10	87961000	T	G	I303S	0	0	0	1	1	0	0	2
rs945979997	10	87965366	T	A	V369D	1	0	0	1	1	0	0	3
rs587781273	10	87965338	A	G	S360G	1	1	0	1	0	0	0	3
rs751286806	10	87965390	A	T	Y377F	0	1	0	1	0	1	0	3
rs1057518538	10	87957952	A	C	Q245P	0	0	0	1	1	0	1	3
rs1085308051	10	87933229	A	G	E157G	0	1	0	1	1	0	0	3
rs786202740	10	87933123	A	G	I122V	0	0	0	1	0	1	1	3
rs786204946	10	87957890	A	G	I224M	0	1	1	1	0	0	0	3
rs786202753	10	87933247	A	G	K163R	0	1	0	1	0	0	1	3
rs759852661	10	87961110	A	G	N340D	0	1	0	1	0	1	0	3
rs587781957	10	87864505	C	G	N12K	0	0	0	1	1	1	0	3
rs587782350	10	87957955	C	T	P246L	0	0	1	1	1	0	0	3
rs1085308053	10	87952230	C	T	T202I	0	1	1	1	0	0	0	3
rs761350690	10	87961048	C	T	T319I	0	1	0	1	0	1	0	3
rs57374291	10	87933078	G	A	D107N	0	1	0	0	0	1	1	3
rs1060500127	10	87965339	G	C	S360T	0	1	0	1	0	0	1	3
rs1335033900	10	87958012	T	G	L265R	0	0	0	1	1	0	1	3
rs1414611362	10	87864507	A	C	K13T	1	0	1	1	0	1	0	4
rs869312775	10	87933103	A	G	D115G	1	0	0	1	1	1	0	4
rs572685299	10	87864497	A	G	S10G	1	0	1	1	0	1	0	4
rs765433422	10	87952250	G	A	G209R	1	0	1	1	1	0	0	4
rs398123324	10	87864513	G	A	R15K	1	0	1	1	0	1	0	4
rs370064195	10	87960981	G	T	D297Y	1	0	0	1	1	0	1	4
rs587782473	10	87952223	T	G	F200V	1	0	1	1	1	0	0	4
rs869312777	10	87933245	C	G	D162E	1	1	1	0	0	1	0	4
rs587781254	10	87933097	G	T	S113I	1	1	0	0	1	0	1	4
rs1164665914	10	87965351	C	G	S364C	1	1	0	1	0	0	1	4
rs370064195	10	87960981	G	C	D297H	1	1	0	1	1	0	0	4
rs778528056	10	87957886	A	T	K223M	1	1	1	0	0	0	1	4
rs146629065	10	87933251	G	C	K164N	1	1	1	0	0	1	0	4
rs786202944	10	87933063	A	C	K102Q	0	1	0	1	0	1	1	4
rs1283085830	10	87894031	A	T	Y29F	0	1	0	1	0	1	1	4
rs761350690	10	87961048	C	A	T319N	0	1	0	1	0	1	1	4
rs786201730	10	87957918	C	T	R234W	0	1	1	1	1	0	0	4
rs876660321	10	87933201	G	A	A148T	0	1	0	1	0	1	1	4
rs9651492	10	87933216	G	A	D153N	0	1	0	1	1	0	1	4
rs121909233	10	87864524	G	A	D19N	0	1	1	1	0	1	0	4
rs786202047	10	87933187	G	A	G143D	0	1	0	1	1	0	1	4
rs770025422	10	87957916	G	A	R233Q	0	0	1	1	1	0	1	4
rs1382752324	10	87894078	G	A	V45I	0	1	0	1	0	1	1	4
rs980089360	10	87894102	G	A	V53I	0	1	0	1	0	1	1	4
rs121909240	10	87957940	T	C	F241S	0	0	1	1	1	0	1	4
rs141373793	10	87957877	T	C	L220P	0	1	0	1	1	0	1	4
rs1064796078	10	87864515	T	C	Y16H	0	0	1	1	1	1	0	4
rs540063602	10	87864526	T	G	D19E	0	1	1	1	0	1	0	4
rs886041877	10	87894025	A	C	Y27S	1	0	1	1	1	1	0	5
rs1085308047	10	87864509	A	G	R14G	1	0	1	1	1	1	0	5
rs398123324	10	87864513	G	T	R15I	1	0	1	1	0	1	1	5
rs746128825	10	87864548	T	A	Y27N	1	0	1	1	1	1	0	5
rs398123326	10	87864542	T	G	L25V	1	0	1	1	0	1	1	5
rs1114167654	10	87961066	T	G	L325R	1	0	1	1	1	1	0	5
rs786204868	10	87952235	C	G	P204A	1	1	1	1	0	0	1	5
rs139767111	10	87933114	G	C	V119L	1	1	1	0	0	1	1	5
rs759852661	10	87961110	A	C	N340H	1	1	1	1	0	1	0	5
rs786204858	10	87933079	A	G	D107G	1	1	1	0	0	1	1	5
rs1206321984	10	87961093	A	G	N334S	1	1	0	1	0	1	1	5
rs876660634	10	87925551	A	G	Y68C	1	1	1	0	1	1	0	5
rs786204932	10	87933150	A	T	T131S	1	1	1	1	0	1	0	5
rs1156887945	10	87957856	C	A	P213H	1	1	1	1	0	0	1	5
rs1060500120	10	87965287	G	A	V343M	1	1	0	1	0	1	1	5
rs876660507	10	87952134	G	T	S170I	1	1	1	0	0	1	1	5
rs980089360	10	87894102	G	T	V53L	1	1	1	1	0	1	0	5
rs1363895668	10	87933174	T	A	L139I	1	1	0	1	0	1	1	5
rs1057519368	10	87957958	T	C	L247S	1	1	1	1	0	0	1	5
rs1060500118	10	87925523	T	C	S59P	1	1	0	1	1	0	1	5
rs794727243	10	87894033	C	A	P30T	0	1	1	1	1	0	1	5
rs1060500111	10	87933067	C	G	P103R	0	1	1	1	1	0	1	5
rs753630034	10	87933184	G	A	R142Q	0	1	0	1	1	1	1	5
rs121909235	10	87957919	G	A	R234Q	0	1	1	1	1	0	1	5
rs121913294	10	87952143	G	T	R173L	0	0	1	1	1	1	1	5
rs876661010	10	87864545	A	C	T26P	1	0	1	1	1	1	1	6
rs786204853	10	87864546	C	T	T26I	1	0	1	1	1	1	1	6
rs398123329	10	87960922	C	T	T277I	1	0	1	1	1	1	1	6
rs1085308040	10	87961096	G	A	R335Q	1	0	1	1	1	1	1	6
rs398123324	10	87864513	G	C	R15T	1	0	1	1	1	1	1	6
rs786204912	10	87864543	T	C	L25S	1	0	1	1	1	1	1	6
rs1064796078	10	87864515	T	G	Y16D	1	0	1	1	1	1	1	6
rs398123321	10	87933090	T	C	W111R	1	1	1	1	1	1	0	6
rs867171992	10	87960926	C	G	F278L	1	1	1	1	1	1	0	6
rs786204867	10	87952224	T	C	F200S	1	1	1	1	1	0	1	6
rs780943695	10	87952121	G	A	V166I	1	1	1	1	0	1	1	6
rs1210737543	10	87952124	A	G	T167A	1	1	1	1	0	1	1	6
rs863224666	10	87933181	A	C	H141P	1	1	1	0	1	1	1	6
rs1114167633	10	87957979	A	C	K254T	1	1	1	1	0	1	1	6
rs1064794080	10	87961117	A	C	K342T	1	1	1	1	0	1	1	6
rs786204925	10	87931074	A	C	K80Q	1	1	1	1	0	1	1	6
rs863224666	10	87933181	A	G	H141R	1	1	1	1	0	1	1	6
rs786204922	10	87925554	A	G	N69S	1	1	1	1	0	1	1	6
rs398123316	10	87925530	A	T	H61L	1	1	1	0	1	1	1	6
rs786204857	10	87933060	A	T	I101F	1	1	1	1	0	1	1	6
rs397514559	10	87952125	C	A	T167N	1	1	1	1	0	1	1	6
rs398123329	10	87960922	C	A	T277K	1	1	1	1	0	1	1	6
rs121909237	10	87933121	C	G	A121G	1	1	1	1	0	1	1	6
rs121909232	10	87952258	C	G	C211W	1	1	1	1	1	0	1	6
rs1085308045	10	87933128	C	G	H123Q	1	1	1	1	1	1	0	6
rs762518389	10	87894089	C	G	N48K	1	1	1	1	1	1	0	6
rs759560822	10	87957961	C	G	P248R	1	1	1	1	1	0	1	6
rs398123320	10	87933045	C	G	P96A	1	1	1	1	0	1	1	6
rs398123329	10	87960922	C	G	T277R	1	1	1	0	1	1	1	6
rs587781535	10	87925538	C	T	H64Y	1	1	1	0	1	1	1	6
rs794727480	10	87925556	C	T	L70F	1	1	1	1	1	1	0	6
rs587783059	10	87933024	C	T	P89S	1	1	1	1	0	1	1	6
rs786204856	10	87933043	C	T	P95L	1	1	1	1	0	1	1	6
rs398123320	10	87933045	C	T	P96S	1	1	1	1	0	1	1	6
rs786204930	10	87933117	G	A	A120T	1	1	1	1	0	1	1	6
rs587781255	10	87933138	G	A	G127R	1	1	1	1	1	1	0	6
rs786204929	10	87933144	G	A	G129R	1	1	1	1	1	1	0	6
rs587782603	10	87952118	G	A	G165R	1	1	1	1	1	1	0	6
rs1085308042	10	87894076	G	A	G44D	1	1	1	1	1	0	1	6
rs1057518425	10	87894085	G	A	R47K	1	1	1	1	0	1	1	6
rs786204854	10	87894051	G	C	G36R	1	1	1	1	1	1	0	6
rs1057519724	10	87933236	G	T	R159S	1	1	1	1	1	1	0	6
rs878853938	10	87933168	GCA	T	A137F	1	1	1	1	1	1	0	6
rs121909221	10	87952135	T	A	S170R	1	1	1	1	1	1	0	6
rs1313989099	10	87933220	T	C	F154S	1	1	1	1	1	0	1	6
rs1339631701	10	87933061	T	C	I101T	1	1	1	1	0	1	1	6
rs1355570425	10	87894028	T	C	I28T	1	1	1	1	0	1	1	6
rs1057518329	10	87894040	T	C	I32T	1	1	1	1	0	1	1	6
rs1064793345	10	87961039	T	C	L316P	1	1	1	1	1	0	1	6
rs121909226	10	87925557	T	C	L70P	1	1	1	1	1	1	0	6
rs1085308046	10	87933160	T	C	M134T	1	1	1	1	0	1	1	6
rs121909225	10	87894049	T	C	M35T	1	1	1	1	0	1	1	6
rs398123325	10	87933222	T	C	Y155H	1	1	1	1	0	1	1	6
rs398123317	10	87925550	T	C	Y68H	1	1	1	1	0	1	1	6
rs1114167658	10	87933013	T	G	V85G	1	1	1	1	1	1	0	6
rs746152219	10	87933183	C	G	R142G	0	1	1	1	1	1	1	6
rs753630034	10	87933184	G	C	R142P	0	1	1	1	1	1	1	6
rs1203217529	10	87894030	T	A	Y29N	0	1	1	1	1	1	1	6
rs786201995	10	87864539	G	C	D24H	1	1	1	1	1	1	1	7
rs786201995	10	87864539	G	T	D24Y	1	1	1	1	1	1	1	7
rs121909239	10	87957973	A	G	D252G	1	1	1	1	1	1	1	7
rs587782316	10	87952145	T	A	Y174N	1	1	1	1	1	1	1	7
rs1064795967	10	87864528	G	A	G20E	1	1	1	1	1	1	1	7
rs1064795967	10	87864528	G	T	G20V	1	1	1	1	1	1	1	7
rs876660420	10	87864533	G	C	D22H	1	1	1	1	1	1	1	7
rs1114167654	10	87961066	T	C	L325P	1	1	1	1	1	1	1	7
rs794727244	10	87894067	G	T	R41I	1	1	1	1	1	1	1	7
rs794729664	10	87952170	T	C	L182S	1	1	1	1	1	1	1	7
rs1114167648	10	87960907	A	C	H272P	1	1	1	1	1	1	1	7
rs1060500128	10	87933237	A	C	T160P	1	1	1	1	1	1	1	7
rs1131691885	10	87925521	A	G	D58G	1	1	1	1	1	1	1	7
rs747865777	10	87931066	A	G	D77G	1	1	1	1	1	1	1	7
rs786202688	10	87933234	A	G	R159G	1	1	1	1	1	1	1	7
rs786204855	10	87894084	A	G	R47G	1	1	1	1	1	1	1	7
rs864622341	10	87952146	A	G	Y174C	1	1	1	1	1	1	1	7
rs786204866	10	87952158	A	G	Y178C	1	1	1	1	1	1	1	7
rs786204915	10	87894082	A	G	Y46C	1	1	1	1	1	1	1	7
rs1114167647	10	87933118	C	A	A120E	1	1	1	1	1	1	1	7
rs587780004	10	87894057	C	A	P38T	1	1	1	1	1	1	1	7
rs1114167630	10	87933042	C	A	P95T	1	1	1	1	1	1	1	7
rs121913293	10	87952142	C	A	R173S	1	1	1	1	1	1	1	7
rs1060500129	10	87933180	C	G	H141D	1	1	1	1	1	1	1	7
rs121909236	10	87925529	C	G	H61D	1	1	1	1	1	1	1	7
rs1064796886	10	87894058	C	G	P38R	1	1	1	1	1	1	1	7
rs587780004	10	87894057	C	T	P38S	1	1	1	1	1	1	1	7
rs746152219	10	87933183	C	T	R142W	1	1	1	1	1	1	1	7
rs121913293	10	87952142	C	T	R173C	1	1	1	1	1	1	1	7
rs397514560	10	87933151	C	T	T131I	1	1	1	1	1	1	1	7
rs876660535	10	87933130	G	A	C124Y	1	1	1	1	1	1	1	7
rs121909241	10	87933154	G	A	G132D	1	1	1	1	1	1	1	7
rs121913294	10	87952143	G	A	R173H	1	1	1	1	1	1	1	7
rs121913294	10	87952143	G	C	R173P	1	1	1	1	1	1	1	7
rs1373782343	10	87961062	G	T	D324Y	1	1	1	1	1	1	1	7
rs398123322	10	87933139	G	T	G127V	1	1	1	1	1	1	1	7
rs121909241	10	87933154	G	T	G132V	1	1	1	1	1	1	1	7
rs786204863	10	87952119	G	T	G165V	1	1	1	1	1	1	1	7
rs121909229	10	87933148	G	T	R130L	1	1	1	1	1	1	1	7
rs1114167673	10	87933235	G	T	R159M	1	1	1	1	1	1	1	7
rs139767111	10	87933114	G	T	V119F	1	1	1	1	1	1	1	7
rs786204875	10	87960913	G	T	W274L	1	1	1	1	1	1	1	7
rs1114167664	10	87957970	GT	G	G251V	1	1	1	1	1	1	1	7
rs786203375	10	87894103	T	A	V53E	1	1	1	1	1	1	1	7
rs398123325	10	87933222	T	A	Y155N	1	1	1	1	1	1	1	7
rs398123317	10	87925550	T	A	Y68N	1	1	1	1	1	1	1	7
rs121909223	10	87933129	T	C	C124R	1	1	1	1	1	1	1	7
rs370795352	10	87933163	T	C	I135T	1	1	1	1	1	1	1	7
rs1064793243	10	87933082	T	C	L108P	1	1	1	1	1	1	1	7
rs121909230	10	87933094	T	C	L112P	1	1	1	1	1	1	1	7
rs1303165645	10	87933072	T	G	C105G	1	1	1	1	1	1	1	7
rs869312776	10	87933167	T	G	C136W	1	1	1	1	1	1	1	7
rs748031178	10	87925515	T	G	F56C	1	1	1	1	1	1	1	7
rs876661177	10	87931078	T	G	F81C	1	1	1	1	1	1	1	7
rs786202398	10	87925518	T	G	L57W	1	1	1	1	1	1	1	7
rs781647403	10	87933052	T	G	L98R	1	1	1	1	1	1	1	7
rs121909225	10	87894049	T	G	M35R	1	1	1	1	1	1	1	7
rs587780005	10	87925541	T	G	Y65D	1	1	1	1	1	1	1	7
						187	199	187	283	166	197	176

## Sheet: TP53
id	chrom	position	ref	alt	Mutation	SIFT	PolyPhen	SNAP2	I_MUT	PHD_SNP	Level	CGI	Score	cBio	Count
rs587781307	17	7676119	C	T	A84T	0	0	0	1	0	0	0	1	TCGA-B	1
rs1159579789	17	7673578	T	C	Q317R	0	0	0	1	0	0	0	1	TCGA-B	1
rs922736614	17	7676399	G	A	P27S	0	0	0	1	0	0	0	1	TCGA-B	3
rs776167460	17	7675053	C	T	G187S	0	0	0	1	0	0	0	1	TCGA-B	5
rs11575996	17	7673535	C	A	Q331H	0	0	0	1	1	0	0	2	TCGA-B	1
rs754332870	17	7676240	C	G	L43F	0	1	0	1	0	0	0	2	TCGA-B	1
rs748891343	17	7673759	C	G	E287D	0	0	0	1	0	1	0	2	TCGA-B	6
rs267605076	17	7674859	C	A	E224D	0	0	1	1	0	1	0	3	TCGA-B	3
rs11540654	17	7676040	C	T	R110H	0	0	0	1	1	0	1	3	TCGA-B	3
rs11540654	17	7676040	C	A	R110L	1	0	0	1	1	0	1	4	TCGA-B	1
rs201382018	17	7676564	C	G	E11Q	1	1	1	1	0	0	0	4	TCGA-B	1
rs72661117	17	7675062	C	T	D184N	0	0	1	1	0	1	1	4	TCGA-B	2
rs1057519991	17	7675076	T	A	H179L	0	0	1	0	1	1	1	4	TCGA-B	2
rs587782447	17	7676049	T	C	Y107C	0	0	1	1	1	0	1	4	TCGA-B	2
rs1057519984	17	7673777	G	C	D281E	1	1	1	0	0	1	0	4	TCGA-B	5
rs876660754	17	7675095	C	A	V173L	1	1	1	0	0	1	0	4	TCGA-B	10
rs587780070	17	7675077	G	A	H179Y	1	1	1	0	0	1	0	4	TCGA-B	12
rs1131691023	17	7675142	A	G	V157A	1	1	1	1	0	0	1	5	TCGA-B	1
rs786204041	17	7674942	C	T	V197M	1	1	0	1	0	1	1	5	TCGA-B	1
rs758781593	17	7675204	T	G	Q136H	1	1	1	1	0	1	0	5	TCGA-B	1
rs137852789	17	7675152	C	T	G154S	0	1	0	1	1	1	1	5	TCGA-B	1
rs587782144	17	7675139	C	T	R158H	0	1	1	1	0	1	1	5	TCGA-B	1
rs121912664	17	7670699	C	T	R337H	0	1	0	1	1	1	1	5	TCGA-B	1
rs138983188	17	7674863	G	A	P223L	0	1	1	1	0	1	1	5	TCGA-B	1
rs587782596	17	7675071	G	A	R181C	0	0	1	1	1	1	1	5	TCGA-B	1
rs201382018	17	7676564	C	T	E11K	1	1	1	1	0	0	1	5	TCGA-B	2
rs587782289	17	7674257	A	G	Y236H	1	1	1	1	0	0	1	5	TCGA-B	2
rs730882025	17	7674885	C	A	V216L	1	1	1	1	0	1	0	5	TCGA-B	2
rs587782620	17	7675185	C	T	V143M	1	1	0	1	0	1	1	5	TCGA-B	2
rs55832599	17	7673821	G	A	R267W	0	1	1	1	1	1	0	5	TCGA-B	2
rs1057520001	17	7674886	A	C	S215R	1	1	1	0	1	1	0	5	TCGA-B	3
rs267605077	17	7675212	A	G	F134L	1	1	1	1	0	1	0	5	TCGA-B	3
rs121912657	17	7673806	C	A	V272L	1	1	1	1	0	1	0	5	TCGA-B	3
rs1057520005	17	7673800	C	G	V274L	1	0	1	1	0	1	1	5	TCGA-B	5
rs876660821	17	7675075	A	C	H179Q	1	1	1	1	0	1	0	5	TCGA-B	5
rs1019340046	17	7674225	C	T	M246I	1	1	1	1	0	1	0	5	TCGA-B	6
rs730881999	17	7675232	G	A	S127F	1	1	1	0	0	1	1	5	TCGA-B	8
rs483352695	17	7674227	T	A	M246L	1	1	1	1	0	1	0	5	TCGA-B	9
rs11540654	17	7676040	C	G	R110P	1	1	1	0	1	0	1	5	TCGA-B	10
rs587782529	17	7670700	G	A	R337C	0	0	1	1	1	1	1	5	TCGA-B	14
rs876658468	17	7674954	G	A	H193Y	1	1	1	0	0	1	1	5	TCGA-B	16
rs587782664	17	7674252	C	A	M237I	1	1	1	1	0	1	0	5	TCGA-B	17
rs121912657	17	7673806	C	T	V272M	1	1	1	1	0	1	0	5	TCGA-B	18
rs864622237	17	7674263	A	C	Y234D	1	0	1	1	1	1	1	6	TCGA-B	1
rs1060501198	17	7674900	T	C	T211A	1	1	1	1	0	1	1	6	TCGA-B	1
rs28934874	17	7675161	G	A	P151S	1	1	1	1	0	1	1	6	TCGA-B	1
rs876660254	17	7674963	G	T	P190T	1	1	1	1	0	1	1	6	TCGA-B	1
rs28934874	17	7675161	G	T	P151T	1	1	1	1	0	1	1	6	TCGA-B	1
rs867114783	17	7675109	T	C	H168R	1	1	1	1	0	1	1	6	TCGA-B	1
rs750600586	17	7675199	G	A	A138V	1	1	1	1	0	1	1	6	TCGA-B	1
rs587781589	17	7674268	A	G	I232T	1	1	1	1	0	1	1	6	TCGA-B	1
rs1057519991	17	7675076	T	G	H179P	1	1	1	0	1	1	1	6	TCGA-B	1
rs1057520002	17	7674242	A	C	S241A	1	1	1	1	0	1	1	6	TCGA-B	1
rs876660333	17	7673805	A	C	V272G	1	1	1	1	1	1	0	6	TCGA-B	1
rs786203436	17	7675125	A	C	Y163D	1	1	1	0	1	1	1	6	TCGA-B	1
rs121912662	17	7670678	A	G	L344P	1	1	1	1	1	1	0	6	TCGA-B	1
rs587782329	17	7674217	C	T	R249K	1	1	1	1	0	1	1	6	TCGA-B	1
rs1420675064	17	7674875	G	A	P219L	1	1	1	1	0	1	1	6	TCGA-B	1
rs1057522275	17	7674246	G	C	N239K	1	1	1	1	1	1	0	6	TCGA-B	1
rs1057520000	17	7675160	G	C	P151R	1	1	1	1	0	1	1	6	TCGA-B	1
rs1057520007	17	7674917	T	A	Y205F	1	1	1	1	0	1	1	6	TCGA-B	1
rs886039484	17	7674888	T	C	S215G	1	1	1	1	0	1	1	6	TCGA-B	1
rs730882026	17	7674256	T	G	Y236S	1	1	1	1	1	0	1	6	TCGA-B	1
rs587782705	17	7675157	G	A	P152L	0	1	1	1	1	1	1	6	TCGA-B	1
rs587782329	17	7674217	C	A	R249M	1	1	1	1	0	1	1	6	TCGA-B	2
rs587782289	17	7674257	A	C	Y236D	1	1	1	1	1	0	1	6	TCGA-B	2
rs967461896	17	7675086	A	T	C176S	1	1	1	1	1	1	0	6	TCGA-B	2
rs587780075	17	7673820	C	G	R267P	1	1	1	1	1	1	0	6	TCGA-B	2
rs764146326	17	7673779	C	T	D281N	1	1	1	0	1	1	1	6	TCGA-B	2
rs1057519985	17	7673763	T	A	E286V	1	1	1	0	1	1	1	6	TCGA-B	2
rs1131691037	17	7675220	T	A	N131I	1	1	1	0	1	1	1	6	TCGA-B	2
rs1057519985	17	7673763	T	C	E286G	1	1	1	1	0	1	1	6	TCGA-B	2
rs121912658	17	7676011	T	C	K120E	1	1	1	1	0	1	1	6	TCGA-B	2
rs483352697	17	7674944	C	T	R196Q	0	1	1	1	1	1	1	6	TCGA-B	2
rs1057519986	17	7673811	A	C	F270C	1	1	0	1	1	1	1	6	TCGA-B	3
rs876659675	17	7674199	A	G	I255T	1	1	1	1	0	1	1	6	TCGA-B	3
rs1057520006	17	7673799	A	G	V274A	1	1	1	1	0	1	1	6	TCGA-B	3
rs1057519982	17	7674239	A	T	C242S	1	1	1	1	1	1	0	6	TCGA-B	3
rs28934573	17	7674241	G	T	S241Y	1	1	1	0	1	1	1	6	TCGA-B	3
rs587781525	17	7673778	T	A	D281V	1	1	1	0	1	1	1	6	TCGA-B	3
rs786201762	17	7674223	T	A	N247I	1	1	1	0	1	1	1	6	TCGA-B	3
rs1057519996	17	7675217	T	G	K132T	1	1	1	1	0	1	1	6	TCGA-B	3
rs786202752	17	7675148	G	T	T155N	1	1	1	1	0	1	1	6	TCGA-B	4
rs530941076	17	7674873	A	G	Y220H	1	1	1	1	0	1	1	6	TCGA-B	4
rs864622237	17	7674263	A	G	Y234H	1	1	1	1	0	1	1	6	TCGA-B	4
rs121912660	17	7673781	C	A	R280I	1	1	1	1	0	1	1	6	TCGA-B	4
rs121912664	17	7670699	C	A	R337L	1	1	1	1	1	1	0	6	TCGA-B	4
rs730882000	17	7675137	C	G	A159P	1	1	1	0	1	1	1	6	TCGA-B	4
rs786201059	17	7673764	C	G	E286Q	1	1	1	1	0	1	1	6	TCGA-B	4
rs587782177	17	7674887	C	G	S215T	1	1	1	1	0	1	1	6	TCGA-B	4
rs863224683	17	7675224	G	C	L130V	1	1	1	1	0	1	1	6	TCGA-B	4
rs786201057	17	7675995	G	T	T125K	1	1	1	1	0	1	1	6	TCGA-B	4
rs1057519996	17	7675217	T	C	K132R	1	1	1	1	0	1	1	6	TCGA-B	4
rs1057519985	17	7673763	T	G	E286A	1	1	1	1	0	1	1	6	TCGA-B	4
rs764146326	17	7673779	C	G	D281H	0	1	1	1	1	1	1	6	TCGA-B	4
rs1131691029	17	7673794	C	G	A276P	1	1	1	0	1	1	1	6	TCGA-B	5
rs1057519987	17	7673810	A	C	F270L	1	1	1	1	1	1	0	6	TCGA-B	5
rs1057520008	17	7674918	A	T	Y205N	1	1	1	1	1	1	0	6	TCGA-B	5
rs764146326	17	7673779	C	A	D281Y	1	1	1	0	1	1	1	6	TCGA-B	5
rs587782177	17	7674887	C	A	S215I	1	1	1	0	1	1	1	6	TCGA-B	5
rs730882005	17	7674250	C	G	C238S	1	1	1	1	1	1	0	6	TCGA-B	6
rs193920817	17	7675131	C	T	A161T	1	1	1	1	0	1	1	6	TCGA-B	6
rs863224451	17	7673796	C	T	C275Y	1	1	1	1	1	1	0	6	TCGA-B	6
rs1057520000	17	7675160	G	T	P151H	1	1	1	1	0	1	1	6	TCGA-B	7
rs28934874	17	7675161	G	C	P151A	1	1	1	1	0	1	1	6	TCGA-B	8
rs28934571	17	7674216	C	A	R249S	1	1	1	1	1	1	0	6	TCGA-B	9
rs1057519990	17	7673824	C	G	G266R	1	1	1	1	1	1	0	6	TCGA-B	10
rs786201838	17	7674953	T	A	H193L	1	1	1	0	1	1	1	6	TCGA-B	10
rs747342068	17	7675218	T	C	K132E	1	1	1	1	0	1	1	6	TCGA-B	10
rs121912654	17	7675143	C	A	V157F	1	1	1	1	1	0	1	6	TCGA-B	11
rs375338359	17	7670684	C	G	R342P	1	1	1	1	1	1	0	6	TCGA-B	13
rs28934573	17	7674241	G	C	S241C	1	1	1	1	0	1	1	6	TCGA-B	14
rs786201059	17	7673764	C	T	E286K	1	1	1	1	0	1	1	6	TCGA-B	16
rs876660754	17	7675095	C	T	V173M	1	1	1	1	0	1	1	6	TCGA-B	16
rs730882025	17	7674885	C	T	V216M	1	1	1	1	0	1	1	6	TCGA-B	16
rs28934573	17	7674241	G	A	S241F	1	1	1	0	1	1	1	6	TCGA-B	17
rs121912660	17	7673781	C	T	R280K	1	1	1	1	0	1	1	6	TCGA-B	20
rs866775781	17	7675216	C	A	K132N	1	1	1	1	1	1	0	6	TCGA-B	21
rs730882026	17	7674256	T	C	Y236C	1	1	1	1	1	0	1	6	TCGA-B	21
rs148924904	17	7675124	T	C	Y163C	1	1	1	0	1	1	1	6	TCGA-B	29
rs1057519991	17	7675076	T	C	H179R	1	1	1	1	0	1	1	6	TCGA-B	36
rs786201838	17	7674953	T	C	H193R	1	1	1	1	0	1	1	6	TCGA-B	45
rs28934576	17	7673802	C	T	R273H	0	1	1	1	1	1	1	6	TCGA-B	85
rs587782082	17	7674218	T	A	R249W	1	1	1	1	1	1	1	7	TCGA-B	1
rs193920789	17	7674249	A	C	C238W	1	1	1	1	1	1	1	7	TCGA-B	1
rs730882027	17	7674211	A	C	I251S	1	1	1	1	1	1	1	7	TCGA-B	1
rs1330865474	17	7674202	A	C	I254S	1	1	1	1	1	1	1	7	TCGA-B	1
rs1057519747	17	7675094	A	C	V173G	1	1	1	1	1	1	1	7	TCGA-B	1
rs1057520004	17	7674884	A	C	V216G	1	1	1	1	1	1	1	7	TCGA-B	1
rs886039483	17	7675236	A	C	Y126D	1	1	1	1	1	1	1	7	TCGA-B	1
rs1064796722	17	7676043	A	G	F109S	1	1	1	1	1	1	1	7	TCGA-B	1
rs587780074	17	7674226	A	G	M246T	1	1	1	1	1	1	1	7	TCGA-B	1
rs1057519998	17	7674950	A	T	L194H	1	1	1	1	1	1	1	7	TCGA-B	1
rs863224451	17	7673796	C	A	C275F	1	1	1	1	1	1	1	7	TCGA-B	1
rs762846821	17	7675151	C	A	G154V	1	1	1	1	1	1	1	7	TCGA-B	1
rs730882008	17	7673775	C	G	R282P	1	1	1	1	1	1	1	7	TCGA-B	1
rs375874539	17	7674237	G	C	C242W	1	1	1	1	1	1	1	7	TCGA-B	1
rs786202082	17	7673793	G	T	A276D	1	1	1	1	1	1	1	7	TCGA-B	1
rs587781525	17	7673778	T	G	D281A	1	1	1	1	1	1	1	7	TCGA-B	1
rs751477326	17	7675082	G	C	P177R	1	1	1	1	1	1	1	7	TCGA-B	2
rs1057520007	17	7674917	T	G	Y205S	1	1	1	1	1	1	1	7	TCGA-B	2
rs864622237	17	7674263	A	T	Y234N	1	1	1	1	1	1	1	7	TCGA-B	2
rs587780074	17	7674226	A	C	M246R	1	1	1	1	1	1	1	7	TCGA-B	2
rs786203436	17	7675125	A	G	Y163H	1	1	1	1	1	1	1	7	TCGA-B	2
rs28934577	17	7674193	A	T	L257Q	1	1	1	1	1	1	1	7	TCGA-B	2
rs1057520004	17	7674884	A	T	V216E	1	1	1	1	1	1	1	7	TCGA-B	2
rs1057520006	17	7673799	A	T	V274D	1	1	1	1	1	1	1	7	TCGA-B	2
rs11540652	17	7674220	C	A	R248L	1	1	1	1	1	1	1	7	TCGA-B	2
rs1057519989	17	7674233	C	G	G244R	1	1	1	1	1	1	1	7	TCGA-B	2
rs11540652	17	7674220	C	G	R248P	1	1	1	1	1	1	1	7	TCGA-B	2
rs587782329	17	7674217	C	G	R249T	1	1	1	1	1	1	1	7	TCGA-B	2
rs1057519989	17	7674233	C	T	G244S	1	1	1	1	1	1	1	7	TCGA-B	2
rs1057519977	17	7675189	G	C	C141W	1	1	1	1	1	1	1	7	TCGA-B	2
rs587780070	17	7675077	G	C	H179D	1	1	1	1	1	1	1	7	TCGA-B	2
rs397516435	17	7674945	G	C	R196G	1	1	1	1	1	1	1	7	TCGA-B	2
rs1064795691	17	7675130	G	T	A161D	1	1	1	1	1	1	1	7	TCGA-B	2
rs587781525	17	7673778	T	C	D281G	1	1	1	1	1	1	1	7	TCGA-B	2
rs879254249	17	7675122	T	C	K164E	1	1	1	1	1	1	1	7	TCGA-B	2
rs587782082	17	7674218	T	C	R249G	1	1	1	1	1	1	1	7	TCGA-B	2
rs28934574	17	7673776	G	C	R282G	1	1	1	1	1	1	1	7	TCGA-B	3
rs1057519981	17	7674251	A	C	C238G	1	1	1	1	1	1	1	7	TCGA-B	3
rs1057519982	17	7674239	A	C	C242G	1	1	1	1	1	1	1	7	TCGA-B	3
rs760043106	17	7674947	A	C	I195S	1	1	1	1	1	1	1	7	TCGA-B	3
rs28934577	17	7674193	A	C	L257R	1	1	1	1	1	1	1	7	TCGA-B	3
rs1057520008	17	7674918	A	C	Y205D	1	1	1	1	1	1	1	7	TCGA-B	3
rs1057519981	17	7674251	A	G	C238R	1	1	1	1	1	1	1	7	TCGA-B	3
rs1057519983	17	7673797	A	G	C275R	1	1	1	1	1	1	1	7	TCGA-B	3
rs760043106	17	7674947	A	T	I195N	1	1	1	1	1	1	1	7	TCGA-B	3
rs1057519997	17	7676037	A	T	L111Q	1	1	1	1	1	1	1	7	TCGA-B	3
rs985033810	17	7674232	C	A	G244V	1	1	1	1	1	1	1	7	TCGA-B	3
rs28934875	17	7675200	C	G	A138P	1	1	1	1	1	1	1	7	TCGA-B	3
rs121912652	17	7674191	C	T	E258K	1	1	1	1	1	1	1	7	TCGA-B	3
rs1057519980	17	7675084	G	C	C176W	1	1	1	1	1	1	1	7	TCGA-B	3
rs942158624	17	7674948	T	A	I195F	1	1	1	1	1	1	1	7	TCGA-B	3
rs1060501201	17	7674190	T	C	E258G	1	1	1	1	1	1	1	7	TCGA-B	3
rs1057519992	17	7674890	T	C	H214R	1	1	1	1	1	1	1	7	TCGA-B	3
rs1057519999	17	7674247	T	C	N239S	1	1	1	1	1	1	1	7	TCGA-B	4
rs864622115	17	7675092	T	C	R174G	1	1	1	1	1	1	1	7	TCGA-B	4
rs121912653	17	7674208	A	G	L252P	1	1	1	1	1	1	1	7	TCGA-B	4
rs1057519988	17	7673812	A	T	F270I	1	1	1	1	1	1	1	7	TCGA-B	4
rs886039483	17	7675236	A	T	Y126N	1	1	1	1	1	1	1	7	TCGA-B	4
rs121912655	17	7674238	C	A	C242F	1	1	1	1	1	1	1	7	TCGA-B	4
rs1057519989	17	7674233	C	A	G244C	1	1	1	1	1	1	1	7	TCGA-B	4
rs1131691043	17	7675098	C	A	V172F	1	1	1	1	1	1	1	7	TCGA-B	4
rs138729528	17	7675089	G	C	R175G	1	1	1	1	1	1	1	7	TCGA-B	4
rs1057519995	17	7674200	T	A	I255F	1	1	1	1	1	1	1	7	TCGA-B	4
rs483352695	17	7674227	T	C	M246V	1	1	1	1	1	1	1	7	TCGA-B	4
rs1057520005	17	7673800	C	A	V274F	1	1	1	1	1	1	1	7	TCGA-B	5
rs780442292	17	7675211	A	C	F134C	1	1	1	1	1	1	1	7	TCGA-B	5
rs876659675	17	7674199	A	C	I255S	1	1	1	1	1	1	1	7	TCGA-B	5
rs879253942	17	7673826	A	G	L265P	1	1	1	1	1	1	1	7	TCGA-B	5
rs876659675	17	7674199	A	T	I255N	1	1	1	1	1	1	1	7	TCGA-B	5
rs28934575	17	7674230	C	A	G245C	1	1	1	1	1	1	1	7	TCGA-B	5
rs193920774	17	7673823	C	A	G266V	1	1	1	1	1	1	1	7	TCGA-B	5
rs28934576	17	7673802	C	G	R273P	1	1	1	1	1	1	1	7	TCGA-B	5
rs879253911	17	7675074	C	T	E180K	1	1	1	1	1	1	1	7	TCGA-B	5
rs1064794311	17	7674214	G	A	P250L	1	1	1	1	1	1	1	7	TCGA-B	5
rs1057519975	17	7675209	A	G	C135R	1	1	1	1	1	1	1	7	TCGA-B	6
rs1057519978	17	7675191	A	G	C141R	1	1	1	1	1	1	1	7	TCGA-B	6
rs1057519986	17	7673811	A	G	F270S	1	1	1	1	1	1	1	7	TCGA-B	6
rs587781991	17	7675208	C	A	C135F	1	1	1	1	1	1	1	7	TCGA-B	6
rs1060501191	17	7673809	C	T	E271K	1	1	1	1	1	1	1	7	TCGA-B	6
rs17849781	17	7673788	G	C	P278A	1	1	1	1	1	1	1	7	TCGA-B	6
rs121912651	17	7674221	G	C	R248G	1	1	1	1	1	1	1	7	TCGA-B	7
rs1057520006	17	7673799	A	C	V274G	1	1	1	1	1	1	1	7	TCGA-B	7
rs1131691025	17	7673835	C	A	G262V	1	1	1	1	1	1	1	7	TCGA-B	7
rs1064793881	17	7673784	C	T	G279E	1	1	1	1	1	1	1	7	TCGA-B	7
rs876659802	17	7673787	G	A	P278L	1	1	1	1	1	1	1	7	TCGA-B	7
rs876659802	17	7673787	G	C	P278R	1	1	1	1	1	1	1	7	TCGA-B	7
rs753660142	17	7673782	T	C	R280G	1	1	1	1	1	1	1	7	TCGA-B	7
rs587781642	17	7676032	A	C	F113V	1	1	1	1	1	1	1	7	TCGA-B	8
rs730882005	17	7674250	C	A	C238F	1	1	1	1	1	1	1	7	TCGA-B	8
rs1464727668	17	7674908	T	A	D208V	1	1	1	1	1	1	1	7	TCGA-B	8
rs763098116	17	7673790	C	A	C277F	1	1	1	1	1	1	1	7	TCGA-B	9
rs121912655	17	7674238	C	T	C242Y	1	1	1	1	1	1	1	7	TCGA-B	9
rs1057520007	17	7674917	T	C	Y205C	1	1	1	1	1	1	1	7	TCGA-B	9
rs121912666	17	7674872	T	G	Y220S	1	1	1	1	1	1	1	7	TCGA-B	9
rs1057519998	17	7674950	A	G	L194P	1	1	1	1	1	1	1	7	TCGA-B	10
rs1057519976	17	7675207	G	C	C135W	1	1	1	1	1	1	1	7	TCGA-B	10
rs121912656	17	7674229	C	A	G245V	1	1	1	1	1	1	1	7	TCGA-B	11
rs17849781	17	7673788	G	T	P278T	1	1	1	1	1	1	1	7	TCGA-B	11
rs587781991	17	7675208	C	T	C135Y	1	1	1	1	1	1	1	7	TCGA-B	13
rs17849781	17	7673788	G	A	P278S	1	1	1	1	1	1	1	7	TCGA-B	13
rs1057519997	17	7676037	A	G	L111P	1	1	1	1	1	1	1	7	TCGA-B	14
rs876660807	17	7674248	T	C	N239D	1	1	1	1	1	1	1	7	TCGA-B	14
rs786202962	17	7675085	C	T	C176Y	1	1	1	1	1	1	1	7	TCGA-B	15
rs587780073	17	7674262	T	C	Y234C	1	1	1	1	1	1	1	7	TCGA-B	15
rs28934576	17	7673802	C	A	R273L	1	1	1	1	1	1	1	7	TCGA-B	17
rs730882005	17	7674250	C	T	C238Y	1	1	1	1	1	1	1	7	TCGA-B	17
rs193920774	17	7673823	C	T	G266E	1	1	1	1	1	1	1	7	TCGA-B	17
rs121912660	17	7673781	C	G	R280T	1	1	1	1	1	1	1	7	TCGA-B	18
rs121912656	17	7674229	C	T	G245D	1	1	1	1	1	1	1	7	TCGA-B	18
rs786202962	17	7675085	C	A	C176F	1	1	1	1	1	1	1	7	TCGA-B	23
rs587781288	17	7675190	C	T	C141Y	1	1	1	1	1	1	1	7	TCGA-B	24
rs28934575	17	7674230	C	T	G245S	1	1	1	1	1	1	1	7	TCGA-B	27
rs1057519998	17	7674950	A	C	L194R	1	1	1	1	1	1	1	7	TCGA-B	28
rs28934574	17	7673776	G	A	R282W	1	1	1	1	1	1	1	7	TCGA-B	29
rs760043106	17	7674947	A	G	I195T	1	1	1	1	1	1	1	7	TCGA-B	38
rs112431538	17	7673767	C	T	E285K	1	1	1	1	1	1	1	7	TCGA-B	50
rs121912666	17	7674872	T	C	Y220C	1	1	1	1	1	1	1	7	TCGA-B	53
rs121913343	17	7673803	G	A	R273C	1	1	1	1	1	1	1	7	TCGA-B	62
rs121912651	17	7674221	G	A	R248W	1	1	1	1	1	1	1	7	TCGA-B	81
rs11540652	17	7674220	C	T	R248Q	1	1	1	1	1	1	1	7	TCGA-B	90
rs876659913	17	7676537	A	G	S20P	0	0	0	0	0	0	0	0
rs762620193	17	7673585	A	T	S315T	0	0	0	0	0	0	0	0
rs35993958	17	7670630	C	A	G360V	0	0	0	0	0	0	0	0
rs535274413	17	7676567	C	G	V10L	0	0	0	0	0	0	0	0
rs1060501202	17	7673715	C	T	G302E	0	0	0	0	0	0	0	0
rs768803947	17	7670624	C	T	S362N	0	0	0	0	0	0	0	0
rs749150541	17	7670609	C	T	S367N	0	0	0	0	0	0	0	0
rs1457582183	17	7673608	G	A	A307V	0	0	0	0	0	0	0	0
rs1353016807	17	7676253	G	A	A39V	0	0	0	0	0	0	0	0
rs372201428	17	7676181	G	A	A63V	0	0	0	0	0	0	0	0
rs756233241	17	7676163	G	A	A69V	0	0	0	0	0	0	0	0
rs587781832	17	7676148	G	A	A74V	0	0	0	0	0	0	0	0
rs201717599	17	7676121	G	A	A83V	0	0	0	0	0	0	0	0
rs1483922249	17	7670633	G	A	P359L	0	0	0	0	0	0	0	0
rs878854064	17	7676584	G	A	P4L	0	0	0	0	0	0	0	0
rs534447939	17	7676124	G	A	P82L	0	0	0	0	0	0	0	0
rs876659415	17	7676572	G	A	P8L	0	0	0	0	0	0	0	0
rs749061599	17	7669656	G	A	R379C	0	0	0	0	0	0	0	0
rs876658527	17	7676136	G	C	A78G	0	0	0	0	0	0	0	0
rs1800369	17	7676532	G	C	D21E	0	0	0	0	0	0	0	0
rs878854065	17	7676157	G	C	P71R	0	0	0	0	0	0	0	0
rs1042522	17	7676154	G	C	P72R	0	0	0	0	0	0	0	0
rs1235781676	17	7676142	G	T	A76E	0	0	0	0	0	0	0	0
rs201717599	17	7676121	G	T	A83E	0	0	0	0	0	0	0	0
rs764735889	17	7673579	G	T	Q317K	0	0	0	0	0	0	0	0
rs755394212	17	7670649	G	T	Q354K	0	0	0	0	0	0	0	0
rs1367492395	17	7673589	G	T	S313R	0	0	0	0	0	0	0	0
rs730882014	17	7676154	GG	A	P72C	0	0	0	0	0	0	0	0
rs786202289	17	7676395	T	A	E28V	0	0	0	0	0	0	0	0
rs1460793472	17	7676187	T	C	D61G	0	0	0	0	0	0	0	0
rs773553186	17	7670636	T	A	E358V	1	0	0	0	0	0	0	1
rs17881470	17	7670613	A	C	S366A	0	0	0	1	0	0	0	1
rs587782877	17	7676250	A	G	M40T	0	0	0	1	0	0	0	1
rs80184930	17	7669659	A	G	S378P	0	0	0	0	0	1	0	1
rs876659630	17	7676233	A	G	S46P	0	0	0	0	1	0	0	1
rs587781277	17	7676574	A	T	D7E	0	0	0	0	0	1	0	1
rs1060501211	17	7676266	A	T	L35M	0	0	0	1	0	0	0	1
rs587780076	17	7673743	C	A	G293W	0	0	0	1	0	0	0	1
rs730882024	17	7674928	C	A	L201F	0	0	0	1	0	0	0	1
rs121912661	17	7676264	C	A	L35F	0	0	0	1	0	0	0	1
rs1463722976	17	7670689	C	A	M340I	0	0	0	1	0	0	0	1
rs863224682	17	7669655	C	A	R379L	0	0	0	1	0	0	0	1
rs768803947	17	7670624	C	A	S362I	0	0	1	0	0	0	0	1
rs201753350	17	7676387	C	A	V31F	0	0	0	1	0	0	0	1
rs1305324490	17	7673738	C	G	E294D	0	0	0	1	0	0	0	1
rs375573770	17	7670682	C	G	E343Q	0	0	0	1	0	0	0	1
rs1390502714	17	7676034	C	G	G112A	0	1	0	0	0	0	0	1
rs863224686	17	7673716	C	G	G302R	0	0	0	1	0	0	0	1
rs766786605	17	7670643	C	G	G356R	0	0	0	1	0	0	0	1
rs786203396	17	7674181	C	G	S261T	0	0	0	1	0	0	0	1
rs1157427821	17	7670646	C	T	A355T	0	0	0	1	0	0	0	1
rs876658902	17	7676182	C	T	A63T	0	0	0	1	0	0	0	1
rs587782148	17	7676113	C	T	A86T	0	0	0	1	0	0	0	1
rs756847009	17	7676245	C	T	D42N	0	0	0	1	0	0	0	1
rs587780728	17	7676224	C	T	D49N	0	0	0	1	0	0	0	1
rs587780076	17	7673743	C	T	G293R	0	0	0	1	0	0	0	1
rs786203298	17	7670631	C	T	G360R	0	0	0	1	0	0	0	1
rs587781858	17	7669671	C	T	G374S	0	0	0	1	0	0	0	1
rs587783064	17	7669626	C	T	G389R	0	0	0	1	0	0	0	1
rs863224682	17	7669655	C	T	R379H	0	0	0	1	0	0	0	1
rs876658714	17	7673712	C	T	S303N	0	0	0	1	0	0	0	1
rs535274413	17	7676567	C	T	V10I	0	0	0	1	0	0	0	1
rs201753350	17	7676387	C	T	V31I	0	0	0	1	0	0	0	1
rs587782423	17	7676152	C	T	V73M	0	0	0	1	0	0	0	1
rs672601296	17	7673734	G	A	H296Y	0	0	0	0	0	0	1	1
rs863224687	17	7673564	G	A	P322S	0	0	0	1	0	0	0	1
rs730881993	17	7676263	G	A	P36S	0	0	0	1	0	0	0	1
rs1800371	17	7676230	G	A	P47S	0	0	0	1	0	0	0	1
rs587782769	17	7676155	G	A	P72S	0	0	0	1	0	0	0	1
rs1060501204	17	7676131	G	A	P80S	0	0	0	1	0	0	0	1
rs730881994	17	7676103	G	A	P89L	0	0	0	1	0	0	0	1
rs372201428	17	7676181	G	C	A63G	0	0	0	1	0	0	0	1
rs756233241	17	7676163	G	C	A69G	0	0	0	1	0	0	0	1
rs1432281680	17	7673561	G	C	L323V	0	0	0	1	0	0	0	1
rs1011445550	17	7676391	G	C	N29K	0	0	0	1	0	0	0	1
rs876660829	17	7673598	G	C	N310K	0	0	0	1	0	0	0	1
rs1322947350	17	7676268	G	C	P34R	0	0	0	1	0	0	0	1
rs757282628	17	7676568	G	C	S9R	0	1	0	0	0	0	0	1
rs145151284	17	7673593	G	C	T312S	0	0	0	1	0	0	0	1
rs772773208	17	7673582	G	T	P316T	0	0	0	1	0	0	0	1
rs863224687	17	7673564	G	T	P322T	0	0	0	1	0	0	0	1
rs587781866	17	7676262	G	T	P36Q	0	0	0	1	0	0	0	1
rs1356004172	17	7676585	G	T	P4T	0	0	0	1	0	0	0	1
rs1042522	17	7676154	G	T	P72H	0	0	0	1	0	0	0	1
rs749061599	17	7669656	G	T	R379S	0	0	0	1	0	0	0	1
rs587781767	17	7676244	T	C	D42G	0	0	0	1	0	0	0	1
rs730881996	17	7676025	T	C	H115R	0	0	0	1	0	0	0	1
rs763426446	17	7670639	T	C	K357R	0	0	0	1	0	0	0	1
rs1064795056	17	7673536	T	C	Q331R	0	0	0	1	0	0	0	1
rs752142489	17	7670648	T	C	Q354R	0	0	0	1	0	0	0	1
rs774656101	17	7676214	T	C	Q52R	0	0	0	1	0	0	0	1
rs781595324	17	7676581	T	C	Q5R	0	0	0	1	0	0	0	1
rs587782391	17	7673713	T	C	S303G	0	0	0	1	0	0	0	1
rs876659459	17	7670610	T	C	S367G	0	0	0	1	0	0	0	1
rs375275361	17	7675054	A	T	D186E	1	0	0	0	0	1	0	2
rs909643864	17	7673721	G	A	P300L	1	0	0	1	0	0	0	2
rs878854064	17	7676584	G	C	P4R	1	0	0	1	0	0	0	2
rs587781386	17	7674889	A	C	H214Q	0	0	0	1	0	1	0	2
rs1418778734	17	7676566	A	C	V10G	0	0	1	1	0	0	0	2
rs1060501196	17	7669640	A	G	M384T	0	0	1	1	0	0	0	2
rs1357147493	17	7676579	A	G	S6P	0	1	0	0	0	1	0	2
rs368771578	17	7676050	A	G	Y107H	0	0	0	1	0	0	1	2
rs370502517	17	7676220	A	T	I50N	0	0	0	1	1	0	0	2
rs121912659	17	7673554	C	A	G325V	0	0	0	1	1	0	0	2
rs1237722021	17	7676194	C	A	G59C	0	0	0	1	1	0	0	2
rs1060501199	17	7673577	C	A	Q317H	0	1	0	1	0	0	0	2
rs201744589	17	7673728	C	G	E298Q	0	0	0	1	0	0	1	2
rs587781858	17	7669671	C	G	G374R	0	0	1	1	0	0	0	2
rs746504075	17	7674290	C	G	V225L	0	0	0	1	0	1	0	2
rs201744589	17	7673728	C	T	E298K	0	0	0	1	0	0	1	2
rs587782237	17	7670637	C	T	E358K	0	0	1	1	0	0	0	2
rs1064795841	17	7674971	C	T	G187D	0	0	0	1	1	0	0	2
rs772354334	17	7675132	C	T	M160I	0	0	0	1	0	1	0	2
rs1048095040	17	7673703	C	T	R306Q	0	0	0	1	0	0	1	2
rs876660285	17	7670621	C	T	R363K	0	0	0	1	0	1	0	2
rs267605075	17	7670616	G	A	H365Y	0	1	0	0	0	1	0	2
rs768046010	17	7670661	G	A	L350F	0	1	0	1	0	0	0	2
rs1064795860	17	7675155	G	A	P153S	0	0	0	1	0	0	1	2
rs146340390	17	7674866	G	A	P222L	0	0	0	1	0	0	1	2
rs1060501203	17	7674867	G	A	P222S	0	0	0	1	0	0	1	2
rs969930693	17	7673542	G	A	T329I	0	0	0	1	1	0	0	2
rs786204227	17	7669689	G	C	H368D	0	0	1	1	0	0	0	2
rs751713111	17	7673736	G	C	P295R	0	0	0	1	0	0	1	2
rs144386518	17	7676196	G	C	P58R	0	0	1	1	0	0	0	2
rs786202752	17	7675148	G	C	T155S	0	0	0	1	0	1	0	2
rs922736614	17	7676399	G	T	P27T	0	1	0	1	0	0	0	2
rs1800371	17	7676230	G	T	P47T	0	0	0	1	1	0	0	2
rs587781371	17	7676041	G	T	R110S	0	0	0	1	0	0	1	2
rs878854069	17	7676066	T	A	K101N	0	0	0	1	0	1	0	2
rs1287887419	17	7670625	T	A	S362C	0	1	0	1	0	0	0	2
rs774269719	17	7669662	T	A	T377S	0	0	0	1	0	1	0	2
rs759728549	17	7676223	T	C	D49G	0	0	0	1	1	0	0	2
rs1373046761	17	7676068	T	C	K101E	0	0	0	1	0	1	0	2
rs121912663	17	7673745	T	C	K292R	0	0	0	1	0	0	1	2
rs876658876	17	7669676	T	C	K372R	0	0	0	1	0	1	0	2
rs72661119	17	7673833	T	C	N263D	0	0	0	1	0	0	1	2
rs587782694	17	7669662	T	G	T377P	0	0	0	1	0	1	0	2
rs587782006	17	7673761	C	T	E287K	1	0	0	1	0	1	0	3
rs1210700121	17	7676094	G	A	P92L	1	0	1	1	0	0	0	3
rs751440465	17	7673587	G	A	S314F	1	0	1	0	0	0	1	3
rs730882009	17	7669641	T	C	M384V	1	0	1	1	0	0	0	3
rs587781858	17	7669671	C	A	G374C	1	1	0	1	0	0	0	3
rs587780728	17	7676224	C	G	D49H	1	1	0	0	1	0	0	3
rs768046010	17	7670661	G	C	L350V	1	1	0	1	0	0	0	3
rs1199893366	17	7674968	A	G	L188P	0	0	0	1	1	0	1	3
rs1064795766	17	7674897	A	T	F212I	0	0	0	1	1	0	1	3
rs587778719	17	7674926	C	A	R202L	0	0	0	1	1	0	1	3
rs587782620	17	7675185	C	A	V143L	0	1	0	1	0	1	0	3
rs372613518	17	7673747	C	G	K291N	0	0	1	1	0	1	0	3
rs1064793603	17	7674277	C	T	C229Y	0	0	1	1	1	0	0	3
rs1064794810	17	7673558	C	T	D324N	0	1	1	1	0	0	0	3
rs17882252	17	7670694	C	T	E339K	0	0	0	1	1	1	0	3
rs1423803759	17	7676035	C	T	G112S	0	1	0	1	1	0	0	3
rs1064796681	17	7675091	C	T	R174K	0	0	0	1	0	1	1	3
rs587778719	17	7674926	C	T	R202H	0	0	0	1	1	0	1	3
rs573154688	17	7670711	C	T	R333H	0	0	0	1	1	0	1	3
rs375338359	17	7670684	C	T	R342Q	0	0	0	1	0	1	1	3
rs150607408	17	7675058	C	T	S185N	0	0	0	1	0	1	1	3
rs121912654	17	7675143	C	T	V157I	0	1	0	1	0	0	1	3
rs121912665	17	7674965	G	A	A189V	0	1	0	0	0	1	1	3
rs587781371	17	7676041	G	A	R110C	0	0	0	1	1	0	1	3
rs587780072	17	7674927	G	A	R202C	0	0	0	1	1	0	1	3
rs779000871	17	7675103	G	A	T170M	0	0	0	1	0	1	1	3
rs1482497533	17	7676560	G	C	P12R	0	1	1	1	0	0	0	3
rs587778718	17	7674959	G	C	P191R	0	0	0	1	0	1	1	3
rs377274728	17	7675134	T	C	M160V	0	0	0	1	0	1	1	3
rs772683278	17	7675149	T	C	T155A	0	0	0	1	0	1	1	3
rs587780729	17	7675104	T	C	T170A	0	0	0	1	0	1	1	3
rs1046611742	17	7675169	T	G	D148A	0	0	0	1	1	0	1	3
rs1000256867	17	7673550	T	G	E326D	0	1	0	1	0	1	0	3
rs769884991	17	7676591	C	T	E2K	0	1	0	1	0	1	1	4
rs879254066	17	7676235	A	G	L45P	1	0	1	1	1	0	0	4
rs587782461	17	7676047	C	T	G108S	1	0	1	1	1	0	0	4
rs1064795139	17	7675213	C	T	M133I	1	0	1	1	0	1	0	4
rs121912663	17	7673745	T	A	K292I	1	0	0	1	1	0	1	4
rs1060501200	17	7674903	T	A	N210Y	1	0	0	1	1	0	1	4
rs1260903787	17	7674920	T	C	E204G	1	0	1	1	0	0	1	4
rs745751553	17	7670622	T	C	R363G	1	0	1	1	0	1	0	4
rs150842067	17	7669644	G	A	L383F	1	1	1	1	0	0	0	4
rs786203938	17	7676587	T	C	E3G	1	1	1	1	0	0	0	4
rs150293825	17	7670695	G	C	F338L	1	1	1	1	0	0	0	4
rs876658916	17	7674184	G	T	S260Y	1	1	1	0	0	0	1	4
rs770374782	17	7673752	G	A	R290C	1	1	0	1	0	0	1	4
rs786201419	17	7675180	C	A	Q144H	1	1	0	1	0	1	0	4
rs1064794810	17	7673558	C	G	D324H	1	1	1	1	0	0	0	4
rs17882252	17	7670694	C	G	E339Q	1	1	0	1	0	1	0	4
rs1177881399	17	7673557	T	C	D324G	1	1	1	1	0	0	0	4
rs786203064	17	7675176	A	C	W146G	0	0	1	1	1	0	1	4
rs587782197	17	7675178	A	G	L145P	0	0	1	1	1	0	1	4
rs730881997	17	7675999	A	T	C124S	0	0	1	1	1	1	0	4
rs730882000	17	7675137	C	T	A159T	0	1	0	1	0	1	1	4
rs1060501206	17	7675056	C	T	D186N	0	1	0	1	0	1	1	4
rs923100890	17	7674912	C	T	D207N	0	0	1	1	0	1	1	4
rs868590738	17	7674960	G	A	P191S	0	1	0	1	0	1	1	4
rs563378859	17	7675146	G	A	R156C	0	0	1	1	1	0	1	4
rs587782596	17	7675071	G	T	R181S	0	0	1	1	0	1	1	4
rs1057519996	17	7675217	T	A	K132M	0	1	1	0	0	1	1	4
rs786203071	17	7675181	T	A	Q144L	0	1	0	1	0	1	1	4
rs1204379654	17	7673770	T	A	T284S	0	1	0	1	0	1	1	4
rs1060501209	17	7675061	T	C	D184G	0	0	1	1	0	1	1	4
rs144340710	17	7674259	T	C	N235S	0	0	0	1	1	1	1	4
rs730882002	17	7674956	T	C	Q192R	0	1	0	1	0	1	1	4
rs28934873	17	7675214	A	G	M133T	1	0	1	1	0	1	1	5
rs762846821	17	7675151	C	T	G154D	1	0	0	1	1	1	1	5
rs730882003	17	7674924	C	T	V203M	1	0	1	1	0	1	1	5
rs587780072	17	7674927	G	C	R202G	1	0	1	1	1	0	1	5
rs587781736	17	7669628	T	G	E388A	1	1	1	1	0	1	0	5
rs587783064	17	7669626	C	A	G389W	1	1	1	1	0	0	1	5
rs35163653	17	7674882	C	T	V217M	1	1	1	1	0	0	1	5
rs786204041	17	7674942	C	A	V197L	1	1	1	1	0	1	0	5
rs397516434	17	7670669	G	A	A347V	1	1	1	0	0	1	1	5
rs1237829645	17	7670693	T	A	E339V	1	1	1	0	1	1	0	5
rs989692988	17	7676023	A	C	S116A	1	1	0	1	0	1	1	5
rs781490101	17	7673748	T	C	K291R	1	1	0	1	0	1	1	5
rs1057519994	17	7674946	G	C	I195M	1	1	0	1	0	1	1	5
rs1192921623	17	7669614	C	T	D393N	1	1	0	1	0	1	1	5
rs1060501193	17	7670667	A	C	L348V	1	1	1	1	0	1	0	5
rs1192921623	17	7669614	C	A	D393Y	1	1	1	0	0	1	1	5
rs587782646	17	7676576	C	G	D7H	1	1	1	1	0	1	0	5
rs1131691034	17	7675120	C	G	K164N	1	1	1	0	1	1	0	5
rs730882023	17	7676080	C	T	V97I	1	1	1	1	0	1	0	5
rs1060501208	17	7676558	G	A	P13S	1	1	1	1	0	1	0	5
rs587778718	17	7674959	G	A	P191L	1	1	0	1	0	1	1	5
rs878854074	17	7674210	G	C	I251M	1	1	0	1	0	1	1	5
rs786203117	17	7674236	T	A	M243L	1	1	1	1	0	1	0	5
rs1212996409	17	7675197	T	C	K139E	1	1	1	0	0	1	1	5
rs747342068	17	7675218	T	G	K132Q	1	1	1	0	0	1	1	5
rs1064794312	17	7674278	A	G	C229R	0	1	1	1	1	0	1	5
rs781724995	17	7676028	A	G	L114S	0	1	0	1	1	1	1	5
rs1057519978	17	7675191	A	T	C141S	0	1	1	1	1	1	0	5
rs371524413	17	7675145	C	T	R156H	0	1	1	1	1	0	1	5
rs771939956	17	7670705	C	T	R335H	0	0	1	1	1	1	1	5
rs149633775	17	7673773	G	A	R283C	0	0	1	1	1	1	1	5
rs149633775	17	7673773	G	T	R283S	0	0	1	1	1	1	1	5
rs745425759	17	7674187	T	C	D259G	0	0	1	1	1	1	1	5
rs786202717	17	7676064	G	A	T102I	1	1	1	1	1	1	0	6
rs587782447	17	7676049	T	G	Y107S	1	1	1	1	1	0	1	6
rs769934890	17	7670712	G	C	R333G	1	1	1	1	1	0	1	6
rs1064796401	17	7670696	A	G	F338S	1	1	1	1	1	0	1	6
rs1064796257	17	7675066	G	C	C182W	1	1	1	1	1	0	1	6
rs1131691007	17	7675170	C	A	D148Y	1	1	1	1	1	0	1	6
rs1131691028	17	7674860	T	G	E224A	1	1	1	1	0	1	1	6
rs371409680	17	7673772	C	T	R283H	1	1	1	1	0	1	1	6
rs587781495	17	7676005	C	T	V122M	1	1	1	1	0	1	1	6
rs876660825	17	7674962	G	A	P190L	1	1	1	1	0	1	1	6
rs878854070	17	7676557	G	A	P13L	1	1	1	1	0	1	1	6
rs746601313	17	7674203	T	C	I254V	1	1	1	1	0	1	1	6
rs1057520002	17	7674242	A	G	S241P	1	1	1	0	1	1	1	6
rs1057519747	17	7675094	A	G	V173A	1	1	1	1	0	1	1	6
rs1057519975	17	7675209	A	T	C135S	1	1	1	1	1	1	0	6
rs730881995	17	7676079	A	T	V97D	1	1	1	1	0	1	1	6
rs368771578	17	7676050	A	T	Y107N	1	1	1	1	1	0	1	6
rs587782289	17	7674257	A	T	Y236N	1	1	1	1	1	0	1	6
rs587781288	17	7675190	C	A	C141F	1	1	1	0	1	1	1	6
rs587782461	17	7676047	C	A	G108C	1	1	1	1	1	0	1	6
rs730882028	17	7670709	C	A	G334W	1	1	1	1	1	1	0	6
rs730882008	17	7673775	C	A	R282L	1	1	0	1	1	1	1	6
rs863224451	17	7673796	C	G	C275S	1	1	1	1	1	1	0	6
rs755238756	17	7676019	C	G	G117A	1	1	1	1	0	1	1	6
rs985033810	17	7674232	C	G	G244A	1	1	1	1	0	1	1	6
rs730882028	17	7670709	C	G	G334R	1	1	1	1	1	1	0	6
rs121912664	17	7670699	C	G	R337P	1	1	1	1	1	1	0	6
rs730882023	17	7676080	C	G	V97L	1	1	1	1	0	1	1	6
rs786201592	17	7674870	C	T	E221K	1	1	1	1	0	1	1	6
rs755238756	17	7676019	C	T	G117E	1	1	1	0	1	1	1	6
rs200579969	17	7673836	C	T	G262S	1	1	1	1	0	1	1	6
rs1286563734	17	7670708	C	T	G334E	1	1	1	0	1	1	1	6
rs397514495	17	7675070	C	T	R181H	1	1	1	1	0	1	1	6
rs587780075	17	7673820	C	T	R267Q	1	1	1	1	1	1	0	6
rs587782177	17	7674887	C	T	S215N	1	1	1	1	0	1	1	6
rs878854072	17	7674879	C	T	V218M	1	1	1	1	0	1	1	6
rs863224683	17	7675224	G	A	L130F	1	1	1	1	0	1	1	6
rs587780071	17	7674951	G	A	L194F	1	1	1	1	0	1	1	6
rs779196500	17	7675187	G	A	P142L	1	1	1	1	0	1	1	6
rs767328513	17	7675158	G	A	P152S	1	1	1	1	0	1	1	6
rs147002414	17	7675083	G	A	P177S	1	1	1	1	0	1	1	6
rs879253894	17	7674876	G	A	P219S	1	1	1	1	0	1	1	6
rs1245723119	17	7676076	G	A	P98L	1	1	1	1	0	1	1	6
rs769934890	17	7670712	G	A	R333C	1	1	1	1	1	0	1	6
rs1064794141	17	7676016	G	A	T118I	1	1	1	1	0	1	1	6
rs786201057	17	7675995	G	A	T125M	1	1	1	1	0	1	1	6
rs863224685	17	7673769	G	A	T284I	1	1	1	1	0	1	1	6
rs786202082	17	7673793	G	C	A276G	1	1	1	1	0	1	1	6
rs876660825	17	7674962	G	C	P190R	1	1	1	1	0	1	1	6
rs587782529	17	7670700	G	C	R337G	1	1	1	1	1	1	0	6
rs730881999	17	7675232	G	C	S127C	1	1	1	1	0	1	1	6
rs1064795203	17	7675080	G	T	H178N	1	1	1	1	0	1	1	6
rs587780070	17	7675077	G	T	H179N	1	1	1	1	0	1	1	6
rs876658468	17	7674954	G	T	H193N	1	1	1	1	0	1	1	6
rs876658466	17	7674891	G	T	H214N	1	1	1	1	0	1	1	6
rs769270327	17	7675219	G	T	N131K	1	1	1	1	1	1	0	6
rs587778718	17	7674959	G	T	P191H	1	1	1	1	0	1	1	6
rs138983188	17	7674863	G	T	P223H	1	1	1	1	0	1	1	6
rs876659802	17	7673787	G	T	P278H	1	1	1	1	0	1	1	6
rs786202561	17	7675193	G	T	T140N	1	1	1	1	0	1	1	6
rs121912667	17	7673766	T	A	E285V	1	1	1	0	1	1	1	6
rs1057519992	17	7674890	T	A	H214L	1	1	1	0	1	1	1	6
rs587782160	17	7675221	T	A	N131Y	1	1	1	0	1	1	1	6
rs144340710	17	7674259	T	A	N235I	1	1	1	0	1	1	1	6
rs730882004	17	7674254	T	C	M237V	1	1	1	1	0	1	1	6
rs587781433	17	7674197	T	C	T256A	1	1	1	1	0	1	1	6
rs786201838	17	7674953	T	G	H193P	1	1	1	0	1	1	1	6
rs1057519992	17	7674890	T	G	H214P	1	1	1	0	1	1	1	6
rs730882007	17	7674212	T	G	I251L	1	1	1	1	0	1	1	6
rs121912658	17	7676011	T	G	K120Q	1	1	1	1	0	1	1	6
rs1057519999	17	7674247	T	G	N239T	1	1	1	0	1	1	1	6
rs786203071	17	7675181	T	G	Q144P	1	1	1	1	0	1	1	6
rs1204379654	17	7673770	T	G	T284P	1	1	1	1	0	1	1	6
rs1060501195	17	7676056	C	T	G105S	0	1	1	1	1	1	1	6
rs779000871	17	7675103	G	C	T170R	1	1	1	1	1	1	1	7
rs970212462	17	7674286	C	A	G226V	1	1	1	1	1	1	1	7
rs879254233	17	7674265	T	C	H233R	1	1	1	1	1	1	1	7
rs1057520008	17	7674918	A	G	Y205H	1	1	1	1	1	1	1	7
rs1064795369	17	7673791	A	C	C277G	1	1	1	1	1	1	1	7
rs1319163924	17	7675112	T	G	Q167P	1	1	1	1	1	1	1	7
rs730881997	17	7675999	A	C	C124G	1	1	1	1	1	1	1	7
rs587780073	17	7674262	T	G	Y234S	1	1	1	1	1	1	1	7
rs397514495	17	7675070	C	A	R181L	1	1	1	1	1	1	1	7
rs587781845	17	7675101	C	T	E171K	1	1	1	1	1	1	1	7
rs1057519975	17	7675209	A	C	C135G	1	1	1	1	1	1	1	7
rs1057519978	17	7675191	A	C	C141G	1	1	1	1	1	1	1	7
rs1057523496	17	7676044	A	C	F109V	1	1	1	1	1	1	1	7
rs1057519988	17	7673812	A	C	F270V	1	1	1	1	1	1	1	7
rs587780069	17	7675127	A	C	I162S	1	1	1	1	1	1	1	7
rs1057519997	17	7676037	A	C	L111R	1	1	1	1	1	1	1	7
rs765848205	17	7674253	A	C	M237R	1	1	1	1	1	1	1	7
rs1453167097	17	7675172	A	C	V147G	1	1	1	1	1	1	1	7
rs1131691021	17	7675097	A	C	V172G	1	1	1	1	1	1	1	7
rs530941076	17	7674873	A	C	Y220D	1	1	1	1	1	1	1	7
rs1064795369	17	7673791	A	G	C277R	1	1	1	1	1	1	1	7
rs1131691013	17	7675223	A	G	L130P	1	1	1	1	1	1	1	7
rs730882006	17	7674235	A	G	M243T	1	1	1	1	1	1	1	7
rs765848205	17	7674253	A	T	M237K	1	1	1	1	1	1	1	7
rs1057519747	17	7675094	A	T	V173E	1	1	1	1	1	1	1	7
rs876660333	17	7673805	A	T	V272E	1	1	1	1	1	1	1	7
rs786203436	17	7675125	A	T	Y163N	1	1	1	1	1	1	1	7
rs530941076	17	7674873	A	T	Y220N	1	1	1	1	1	1	1	7
rs200579969	17	7673836	C	A	G262C	1	1	1	1	1	1	1	7
rs483352697	17	7674944	C	A	R196L	1	1	1	1	1	1	1	7
rs587778720	17	7674893	C	A	R213L	1	1	1	1	1	1	1	7
rs1060501195	17	7676056	C	G	G105R	1	1	1	1	1	1	1	7
rs121912656	17	7674229	C	G	G245A	1	1	1	1	1	1	1	7
rs28934575	17	7674230	C	G	G245R	1	1	1	1	1	1	1	7
rs587782144	17	7675139	C	G	R158P	1	1	1	1	1	1	1	7
rs483352697	17	7674944	C	G	R196P	1	1	1	1	1	1	1	7
rs587778720	17	7674893	C	G	R213P	1	1	1	1	1	1	1	7
rs763098116	17	7673790	C	T	C277Y	1	1	1	1	1	1	1	7
rs587781504	17	7676055	C	T	G105D	1	1	1	1	1	1	1	7
rs985033810	17	7674232	C	T	G244D	1	1	1	1	1	1	1	7
rs587778720	17	7674893	C	T	R213Q	1	1	1	1	1	1	1	7
rs730882008	17	7673775	C	T	R282Q	1	1	1	1	1	1	1	7
rs751477326	17	7675082	G	A	P177L	1	1	1	1	1	1	1	7
rs587780068	17	7675140	G	A	R158C	1	1	1	1	1	1	1	7
rs138729528	17	7675089	G	A	R175C	1	1	1	1	1	1	1	7
rs375444154	17	7670706	G	A	R335C	1	1	1	1	1	1	1	7
rs876658468	17	7674954	G	C	H193D	1	1	1	1	1	1	1	7
rs397516436	17	7674894	G	C	R213G	1	1	1	1	1	1	1	7
rs786201057	17	7675995	G	C	T125R	1	1	1	1	1	1	1	7
rs397516434	17	7670669	G	T	A347D	1	1	1	1	1	1	1	7
rs121913343	17	7673803	G	T	R273S	1	1	1	1	1	1	1	7
rs730882022	17	7675136	GC	A	A159F	1	1	1	1	1	1	1	7
rs786204145	17	7674260	T	A	N235Y	1	1	1	1	1	1	1	7
rs786203117	17	7674236	T	C	M243V	1	1	1	1	1	1	1	7
rs1452189221	17	7674224	T	C	N247D	1	1	1	1	1	1	1	7
rs786201762	17	7674223	T	C	N247S	1	1	1	1	1	1	1	7
rs1057520003	17	7675996	T	G	T125P	1	1	1	1	1	1	1	7
						415	431	430	537	307	434	401
